# Supplementary material
Source: PubMed Central journal article supplement (PMC9257887)
Supplement: mmc1.pdf [file mmc1.pdf]

# Pharmacotherapeutic impact on nonalcoholic steatohepatitis histology: a systematic review and network meta-analysis

Alexander J. Kovalic, MD

## Supplementary Materials

|                                                                                                                           |           |
|---------------------------------------------------------------------------------------------------------------------------|-----------|
| <b>Appendix 1: References of studies included in network meta-analysis</b> .....                                          | <b>4</b>  |
| <b>Appendix 2: Individual characteristics of included studies included in the network meta-analysis</b> .....             | <b>7</b>  |
| <b>Appendix 3: Network plots of treatment comparisons</b> .....                                                           | <b>10</b> |
| e-Figure 1: $\geq 2$ -point decrease in NAFLD Activity Score [NAS] .....                                                  | 10        |
| e-Figure 2: NASH resolution without worsening fibrosis .....                                                              | 11        |
| e-Figure 3: Fibrosis improvement without worsening NASH .....                                                             | 12        |
| e-Figure 4: Fibrosis improvement regardless of NASH progression .....                                                     | 13        |
| e-Figure 5: Mean change in NAFLD Activity Score [NAS] .....                                                               | 14        |
| e-Figure 6: Mean change in steatosis.....                                                                                 | 15        |
| e-Figure 7: Mean change in lobular inflammation .....                                                                     | 16        |
| e-Figure 8: Mean change in hepatocellular ballooning.....                                                                 | 17        |
| e-Figure 9: Mean change in fibrosis .....                                                                                 | 18        |
| <b>Appendix 4: Network meta-analysis results characterized by network league tables</b> .....                             | <b>19</b> |
| e-Table 1: $\geq 2$ -point decrease in NAFLD Activity Score [NAS].....                                                    | 19        |
| e-Table 2: NASH resolution without worsening fibrosis .....                                                               | 20        |
| e-Table 3: Fibrosis improvement without worsening NASH .....                                                              | 21        |
| e-Table 4: Fibrosis improvement regardless of NASH progression .....                                                      | 22        |
| e-Table 5: Mean change in NAFLD Activity Score [NAS] .....                                                                | 23        |
| e-Table 6: Mean change in steatosis.....                                                                                  | 24        |
| e-Table 7: Mean change in lobular inflammation.....                                                                       | 25        |
| e-Table 8: Mean change in hepatocellular ballooning.....                                                                  | 26        |
| e-Table 9: Mean change in fibrosis .....                                                                                  | 27        |
| <b>Appendix 5: Forest plots of individual outcomes of network meta-analysis in order of relative treatment rank</b> ..... | <b>28</b> |
| e-Figure 10: $\geq 2$ -point decrease in NAFLD Activity Score [NAS].....                                                  | 28        |
| e-Figure 11: NASH resolution without worsening fibrosis .....                                                             | 29        |
| e-Figure 12: Fibrosis improvement without worsening NASH .....                                                            | 30        |
| e-Figure 13: Fibrosis improvement regardless of NASH progression .....                                                    | 31        |
| e-Figure 14: Mean change in NAFLD Activity Score [NAS] .....                                                              | 32        |
| e-Figure 15: Mean change in steatosis.....                                                                                | 33        |
| e-Figure 16: Mean change in lobular inflammation.....                                                                     | 34        |
| e-Figure 17: Mean change in hepatocellular ballooning.....                                                                | 35        |

|                                                                                                                                                |           |
|------------------------------------------------------------------------------------------------------------------------------------------------|-----------|
| e-Figure 18: Mean change in fibrosis .....                                                                                                     | 36        |
| <b>Appendix 6: Risk of bias assessment of included randomized controlled trials using the revised Cochrane Risk of Bias tool [RoB 2] .....</b> | <b>37</b> |
| <b>Appendix 7: Assessment of global inconsistency across networks.....</b>                                                                     | <b>39</b> |
| <b>Appendix 8: Visualization of inconsistency within the network using network heat plots .....</b>                                            | <b>40</b> |
| e-Figure 19: $\geq 2$ -point decrease in NAFLD Activity Score [NAS].....                                                                       | 40        |
| e-Figure 20: NASH resolution without worsening fibrosis .....                                                                                  | 41        |
| e-Figure 21: Fibrosis improvement without worsening NASH .....                                                                                 | 42        |
| e-Figure 22: Fibrosis improvement regardless of NASH progression .....                                                                         | 42        |
| e-Figure 23: Mean change in NAFLD Activity Score [NAS] .....                                                                                   | 42        |
| e-Figure 24: Mean change in steatosis.....                                                                                                     | 43        |
| e-Figure 25: Mean change in lobular inflammation.....                                                                                          | 44        |
| e-Figure 26: Mean change in hepatocellular ballooning.....                                                                                     | 45        |
| e-Figure 27: Mean change in fibrosis .....                                                                                                     | 46        |
| <b>Appendix 9: Visualization of inconsistency within networks via forest plots of node splitting .....</b>                                     | <b>47</b> |
| e-Figure 28: $\geq 2$ -point decrease in NAFLD Activity Score [NAS].....                                                                       | 47        |
| e-Figure 29: NASH resolution without worsening fibrosis .....                                                                                  | 48        |
| e-Figure 30: Fibrosis improvement without worsening NASH .....                                                                                 | 49        |
| e-Figure 31: Fibrosis improvement regardless of NASH progression .....                                                                         | 50        |
| e-Figure 32: Mean change in NAFLD Activity Score [NAS] .....                                                                                   | 51        |
| e-Figure 33: Mean change in steatosis.....                                                                                                     | 52        |
| e-Figure 34: Mean change in lobular inflammation.....                                                                                          | 53        |
| e-Figure 35: Mean change in hepatocellular ballooning.....                                                                                     | 54        |
| e-Figure 36: Mean change in fibrosis .....                                                                                                     | 55        |
| <b>Appendix 10: Assessment of inconsistency within the closed loops of each network.....</b>                                                   | <b>56</b> |
| <b>Appendix 11: Comparison-adjusted funnel plots for each network .....</b>                                                                    | <b>59</b> |
| e-Figure 37: $\geq 2$ -point decrease in NAFLD Activity Score [NAS].....                                                                       | 59        |
| e-Figure 38: NASH resolution without worsening fibrosis .....                                                                                  | 60        |
| e-Figure 39: Fibrosis improvement without worsening NASH .....                                                                                 | 61        |
| e-Figure 40: Fibrosis improvement regardless of NASH progression .....                                                                         | 62        |
| e-Figure 41: Mean change in NAFLD Activity Score [NAS] .....                                                                                   | 63        |
| e-Figure 42: Mean change in steatosis.....                                                                                                     | 64        |
| e-Figure 43: Mean change in lobular inflammation.....                                                                                          | 65        |
| e-Figure 44: Mean change in hepatocellular ballooning.....                                                                                     | 66        |
| e-Figure 45: Mean change in fibrosis .....                                                                                                     | 67        |
| <b>Appendix 12: GRADE assessments and summary of evidence .....</b>                                                                            | <b>68</b> |

|                                                                                                                                             |            |
|---------------------------------------------------------------------------------------------------------------------------------------------|------------|
| <b>Appendix 13: NMA subgroup analysis after removal of clinical studies reporting all patients with cirrhosis at baseline .....</b>         | <b>171</b> |
| e-Figure 46: $\geq$ 2-point decrease in NAFLD Activity Score [NAS].....                                                                     | 171        |
| e-Figure 47: NASH resolution without worsening fibrosis .....                                                                               | 172        |
| e-Figure 48: Fibrosis improvement without worsening NASH .....                                                                              | 173        |
| e-Figure 49: Fibrosis improvement regardless of NASH progression.....                                                                       | 174        |
| e-Figure 50: Mean change in NAFLD Activity Score [NAS] .....                                                                                | 175        |
| e-Figure 51: Mean change in steatosis .....                                                                                                 | 176        |
| e-Figure 52: Mean change in lobular inflammation.....                                                                                       | 177        |
| e-Figure 53: Mean change in hepatocellular ballooning.....                                                                                  | 178        |
| e-Figure 54: Mean change in fibrosis .....                                                                                                  | 179        |
| <b>Appendix 14: NMA subgroup analysis after removal of clinical studies reporting all patients with diabetes mellitus at baseline .....</b> | <b>180</b> |
| e-Figure 55: $\geq$ 2-point decrease in NAFLD Activity Score [NAS].....                                                                     | 180        |
| e-Figure 56: NASH resolution without worsening fibrosis .....                                                                               | 181        |
| e-Figure 57: Fibrosis improvement without worsening NASH .....                                                                              | 182        |
| e-Figure 58: Fibrosis improvement regardless of NASH progression.....                                                                       | 183        |
| e-Figure 59: Mean change in NAFLD Activity Score [NAS] .....                                                                                | 184        |
| e-Figure 60: Mean change in steatosis .....                                                                                                 | 185        |
| e-Figure 61: Mean change in lobular inflammation.....                                                                                       | 186        |
| e-Figure 62: Mean change in hepatocellular ballooning.....                                                                                  | 187        |
| e-Figure 63: Mean change in fibrosis .....                                                                                                  | 188        |
| <b>Appendix 15: NMA subgroup analysis after removal of clinical studies reporting length of treatment of six months or less.....</b>        | <b>189</b> |
| e-Figure 64: $\geq$ 2-point decrease in NAFLD Activity Score [NAS].....                                                                     | 189        |
| e-Figure 65: NASH resolution without worsening fibrosis .....                                                                               | 190        |
| e-Figure 66: Fibrosis improvement without worsening NASH .....                                                                              | 191        |
| e-Figure 67: Fibrosis improvement regardless of NASH progression.....                                                                       | 192        |
| e-Figure 68: Mean change in NAFLD Activity Score [NAS] .....                                                                                | 193        |
| e-Figure 69: Mean change in steatosis .....                                                                                                 | 194        |
| e-Figure 70: Mean change in lobular inflammation.....                                                                                       | 195        |
| e-Figure 71: Mean change in hepatocellular ballooning.....                                                                                  | 196        |
| e-Figure 72: Mean change in fibrosis .....                                                                                                  | 197        |
| <b>Appendix 16: PRISMA checklist for reporting a systematic review and network meta-analysis.....</b>                                       | <b>198</b> |

## Appendix 1: References of studies included in network meta-analysis

1. **Ratziu V, Sanyal A**, Harrison SA, et al. Cenicriviroc Treatment for Adults With Nonalcoholic Steatohepatitis and Fibrosis: Final Analysis of the Phase 2b CENTAUR Study. *Hepatology* 2020;72:892-905.
2. Harrison SA, Neff G, Guy CD, et al. Efficacy and Safety of Aldafermin, an Engineered FGF19 Analog, in a Randomized, Double-Blind, Placebo-Controlled Trial of Patients With Nonalcoholic Steatohepatitis. *Gastroenterology* 2021;160:219-231.e1.
3. Newsome PN, Palmer M, Freilich B, et al. Volixibat in adults with non-alcoholic steatohepatitis: 24-week interim analysis from a randomized, phase II study. *J Hepatol* 2020;73:231-240.
4. Harrison SA, Wong VW, Okanoue T, et al. Selonsertib for patients with bridging fibrosis or compensated cirrhosis due to NASH: Results from randomized phase III STELLAR trials. *J Hepatol* 2020;73:26-39.
5. Harrison SA, Alkhoury N, Davison BA, et al. Insulin sensitizer MSDC-0602K in non-alcoholic steatohepatitis: A randomized, double-blind, placebo-controlled phase IIb study. *J Hepatol* 2020;72:613-626.
6. Chalasani N, Abdelmalek MF, Garcia-Tsao G, et al. Effects of Belapectin, an Inhibitor of Galectin-3, in Patients With Nonalcoholic Steatohepatitis With Cirrhosis and Portal Hypertension. *Gastroenterology* 2020;158:1334-1345.e5.
7. Harrison SA, Goodman Z, Jabbar A, et al. A randomized, placebo-controlled trial of emricasan in patients with NASH and F1-F3 fibrosis. *J Hepatol* 2020;72:816-827.
8. Alam S, Abrar M, Islam S, et al. Effect of telmisartan and vitamin E on liver histopathology with non-alcoholic steatohepatitis: A randomized, open-label, noninferiority trial. *JGH Open* 2020;4:663-669.
9. Sarin SK, Sharma M, Koradia P, et al. A prospective, multi-center, double-blind, randomized trial of Saroglitazar 4 mg compared to placebo in patients with nonalcoholic steatohepatitis. *Hepatology International* 2020;14:S326-S327.
10. **Younossi ZM, Ratziu V**, Loomba R, et al. Obeticholic acid for the treatment of non-alcoholic steatohepatitis: interim analysis from a multicentre, randomised, placebo-controlled phase 3 trial. *Lancet* 2019;394:2184-2196.
11. Bril F, Biernacki DM, Kalavalapalli S, et al. Role of Vitamin E for Nonalcoholic Steatohepatitis in Patients With Type 2 Diabetes: A Randomized Controlled Trial. *Diabetes Care* 2019;42:1481-1488.
12. Harrison SA, Bashir MR, Guy CD, et al. Resmetirom (MGL-3196) for the treatment of non-alcoholic steatohepatitis: a multicentre, randomised, double-blind, placebo-controlled, phase 2 trial. *Lancet* 2019;394:2012-2024.
13. **Navarro VJ, Belle SH, D'Amato M**, et al. Silymarin in non-cirrhotics with non-alcoholic steatohepatitis: A randomized, double-blind, placebo controlled trial. *PLoS One* 2019;14:e0221683.
14. Harrison SA, Abdelmalek MF, Caldwell S, et al. Simtuzumab Is Ineffective for Patients With Bridging Fibrosis or Compensated Cirrhosis Caused by Nonalcoholic Steatohepatitis. *Gastroenterology* 2018;155:1140-1153.
15. Alam S, Ghosh J, Mustafa G, et al. Effect of sitagliptin on hepatic histological activity and fibrosis of nonalcoholic steatohepatitis patients: a 1-year randomized control trial. *Hepatic Medicine: Evidence and Research* 2018;10:23-31.
16. McPherson S, Wilkinson N, Tiniakos D, et al. A randomised controlled trial of losartan as an anti-fibrotic agent in non-alcoholic steatohepatitis. *PLoS One* 2017;12:e0175717.
17. Alam S, Hasan SKMN, Mustafa G, et al. Effect of pentoxifylline on histological activity and fibrosis of nonalcoholic steatohepatitis patients: A one year randomized control trial. *Hepatology International* 2017;11:S931-S932.



18. Joy TR, McKenzie CA, Tirona RG, et al. Sitagliptin in patients with non-alcoholic steatohepatitis: A randomized, placebo-controlled trial. *World J Gastroenterol* 2017;23:141-150.
19. Armstrong MJ, Gaunt P, Aithal GP, et al. Liraglutide safety and efficacy in patients with non-alcoholic steatohepatitis (LEAN): a multicentre, double-blind, randomised, placebo-controlled phase 2 study. *Lancet* 2016;387:679-90.
20. Cusi K, Orsak B, Bril F, et al. Long-Term Pioglitazone Treatment for Patients With Nonalcoholic Steatohepatitis and Prediabetes or Type 2 Diabetes Mellitus: A Randomized Trial. *Ann Intern Med* 2016;165:305-15.
21. Nogueira MA, Oliveira CP, Ferreira Alves VA, et al. Omega-3 polyunsaturated fatty acids in treating non-alcoholic steatohepatitis: A randomized, double-blind, placebo-controlled trial. *Clin Nutr* 2016;35:578-86.
22. Alam S, Kabir J, Mustafa G, et al. Effect of telmisartan on histological activity and fibrosis of non-alcoholic steatohepatitis: A 1-year randomized control trial. *Saudi J Gastroenterol* 2016;22:69-76.
23. Ratziu V, Harrison SA, Francque S, et al. Elafibranor, an Agonist of the Peroxisome Proliferator-Activated Receptor- $\alpha$  and - $\delta$ , Induces Resolution of Nonalcoholic Steatohepatitis Without Fibrosis Worsening. *Gastroenterology* 2016;150:1147-1159e5.
24. Neuschwander-Tetri BA, Loomba R, Sanyal AJ, et al. Farnesoid X nuclear receptor ligand obeticholic acid for non-cirrhotic, non-alcoholic steatohepatitis (FLINT): a multicentre, randomised, placebo-controlled trial. *Lancet* 2015;385:956-65.
25. Loomba R, Sirlin CB, Ang B, et al. Ezetimibe for the treatment of nonalcoholic steatohepatitis: assessment by novel magnetic resonance imaging and magnetic resonance elastography in a randomized trial (MOZART trial). *Hepatology* 2015;61:1239-50.
26. Dasarathy S, Dasarathy J, Khiyami A, et al. Double-blind randomized placebo-controlled clinical trial of omega 3 fatty acids for the treatment of diabetic patients with nonalcoholic steatohepatitis. *J Clin Gastroenterol* 2015;49:137-44.
27. Argo CK, Patrie JT, Lackner C, et al. Effects of n-3 fish oil on metabolic and histological parameters in NASH: A double-blind, randomized, placebo-controlled trial. *Journal of Hepatology* 2015;62:190-197.
28. Sanyal AJ, Abdelmalek MF, Suzuki A, et al. No significant effects of ethyl-eicosapentanoic acid on histologic features of nonalcoholic steatohepatitis in a phase 2 trial. *Gastroenterology* 2014;147:377-84.e1.
29. Shenoy KT, Balakumaran LK, Mathew P, et al. Metadoxine versus placebo for the treatment of non-alcoholic steatohepatitis: A randomized controlled trial. *Journal of Clinical and Experimental Hepatology* 2014;4:94-100.
30. Sharma BC, Kumar A, Garg V, et al. A Randomized Controlled Trial Comparing Efficacy of Pentoxifylline and Pioglitazone on Metabolic Factors and Liver Histology in Patients with Non-alcoholic Steatohepatitis. *Journal of Clinical and Experimental Hepatology* 2012;2:333-337.
31. Le TA, Chen J, Changchien C, et al. Effect of colesivelam on liver fat quantified by magnetic resonance in nonalcoholic steatohepatitis: a randomized controlled trial. *Hepatology* 2012;56:922-32.
32. Torres DM, Jones FJ, Shaw JC, et al. Rosiglitazone versus rosiglitazone and metformin versus rosiglitazone and losartan in the treatment of nonalcoholic steatohepatitis in humans: a 12-month randomized, prospective, open-label trial. *Hepatology* 2011;54:1631-9.
33. Zein CO, Yerian LM, Gogate P, et al. Pentoxifylline improves nonalcoholic steatohepatitis: a randomized placebo-controlled trial. *Hepatology* 2011;54:1610-9.
34. Van Wagner LB, Koppe SW, Brunt EM, et al. Pentoxifylline for the treatment of non-alcoholic steatohepatitis: a randomized controlled trial. *Ann Hepatol* 2011;10:277-86.
35. Leuschner UF, Lindenthal B, Herrmann G, et al. High-dose ursodeoxycholic acid therapy for nonalcoholic steatohepatitis: a double-blind, randomized, placebo-controlled trial. *Hepatology* 2010;52:472-9.

36. Sanyal AJ, Chalasani N, Kowdley KV, et al. Pioglitazone, vitamin E, or placebo for nonalcoholic steatohepatitis. *N Engl J Med* 2010;362:1675-85.
37. Shields WW, Thompson KE, Grice GA, et al. The effect of metformin and standard therapy versus standard therapy alone in nondiabetic patients with insulin resistance and nonalcoholic steatohepatitis (NASH): A pilot trial. *Therapeutic Advances in Gastroenterology* 2009;2:157-163.
38. Ratziu V, Giral P, Jacqueminet S, et al. Rosiglitazone for nonalcoholic steatohepatitis: one-year results of the randomized placebo-controlled Fatty Liver Improvement with Rosiglitazone Therapy (FLIRT) Trial. *Gastroenterology* 2008;135:100-10.

**\*Author names in bold designate shared co-first authorship**

## Appendix 2: Individual characteristics of included studies included in the network meta-analysis

| Study [Reference]                                   | Clinical Trial Number(s)* | Length of treatment | Interventions                                      |                                |                      |                          | Sample Size |     |     |     | Percentage of patients with type 2 diabetes mellitus |        |        |       | Percentage of patients with cirrhosis |        |        |      |
|-----------------------------------------------------|---------------------------|---------------------|----------------------------------------------------|--------------------------------|----------------------|--------------------------|-------------|-----|-----|-----|------------------------------------------------------|--------|--------|-------|---------------------------------------|--------|--------|------|
|                                                     |                           |                     | A                                                  | B                              | C*                   | D*                       | A           | B   | C*  | D*  | A                                                    | B      | C*     | D*    | A                                     | B      | C*     | D*   |
|                                                     |                           |                     | Ratziu et al., 2020 <sup>1</sup>                   | NCT02217475                    | 2 years              | Senicriviroc 150mg daily | Placebo     | n/a | n/a | 109 | 58                                                   | n/a    | n/a    | 60.3% | 41.7%                                 | n/a    | n/a    | 0.0% |
| Harrison, Neff, et al., 2020 <sup>2</sup>           | NCT02443116               | 24 weeks            | Aldafermin 1mg SQ daily                            | Placebo                        | n/a                  | n/a                      | 52          | 25  | n/a | n/a | 60.4%                                                | 64.0%  | n/a    | n/a   | 0.0%                                  | 0.0%   | n/a    | n/a  |
| Newsome, Palmer, et al., 2020 <sup>3</sup>          | NCT02787304               | 48 weeks            | Volixibat 20mg daily                               | Volixibat 10mg daily           | Volixibat 5mg daily  | Placebo                  | 8           | 12  | 13  | 13  | n/a                                                  | n/a    | n/a    | n/a   | 0.0%                                  | 0.0%   | 0.0%   | 0.0% |
| Harrison, Wong, et al., 2020 <sup>4</sup>           | NCT03053050               | 48 weeks            | Selonsertib 18mg daily                             | Selonsertib 6mg daily          | Placebo              | n/a                      | 322         | 321 | 159 | n/a | 69.6%                                                | 69.5%  | 73.0%  | n/a   | 0.0%                                  | 0.0%   | 0.0%   | n/a  |
| Harrison, Alkhourri, et al., 2020 <sup>5</sup>      | NCT02784444               | 12 months           | MSDC0602K 250mg TID                                | MSDC0602K 125mg TID            | MSDC0602K 62.5mg TID | Placebo                  | 86          | 82  | 84  | 74  | 51.5%                                                | 52.0%  | 55.6%  | 50.0% | 0.0%                                  | 0.0%   | 0.0%   | 0.0% |
| Chalasan et al., 2020 <sup>6</sup>                  | NCT02462967               | 52 weeks            | Belaepectin 8mg kg IV biweekly                     | Belaepectin 2mg kg IV biweekly | Placebo              | n/a                      | 54          | 54  | 54  | n/a | 66.7%                                                | 59.3%  | 59.3%  | n/a   | 98.0%                                 | 100.0% | 100.0% | n/a  |
| Harrison, Wong, et al., 2020 cirrhosis <sup>4</sup> | NCT03053050               | 48 weeks            | Selonsertib 18mg daily                             | Selonsertib 6mg daily          | Placebo              | n/a                      | 354         | 351 | 172 | n/a | 76.3%                                                | 76.6%  | 78.5%  | n/a   | 100.0%                                | 100.0% | 100.0% | n/a  |
| Harrison, Goodman, et al., 2020 <sup>7</sup>        | NCT02686762               | 72 weeks            | Emricasan 50mg BID                                 | Emricasan 5mg BID              | Placebo              | n/a                      | 106         | 107 | 105 | n/a | 51.9%                                                | 51.4%  | 48.6%  | n/a   | 0.0%                                  | 0.0%   | 0.0%   | n/a  |
| Alam et al., 2020 <sup>8</sup>                      | n/a                       | 1 year              | Telmisartan 40mg daily                             | Vitamin E 800 IU daily         | n/a                  | n/a                      | 16          | 14  | n/a | n/a | 25.0%                                                | 42.9%  | n/a    | n/a   | n/a                                   | n/a    | n/a    | n/a  |
| Sarin et al., 2020 <sup>9</sup>                     | n/a                       | 52 weeks            | Saroglitazar 4mg daily                             | Placebo                        | n/a                  | n/a                      | 68          | 34  | n/a | n/a | n/a                                                  | n/a    | n/a    | n/a   | 0.0%                                  | 0.0%   | n/a    | n/a  |
| Younossi et al., 2019 <sup>10</sup>                 | NCT02548351               | 18 months           | Obeticholic acid 25mg daily                        | Obeticholic acid 10mg daily    | Placebo              | n/a                      | 308         | 312 | 311 | n/a | 55.5%                                                | 54.8%  | 56.3%  | n/a   | 0.0%                                  | 0.0%   | 0.0%   | n/a  |
| Bril et al., 2019 <sup>11</sup>                     | n/a                       | 18 months           | Vitamin E 800 IU daily and Pioglitazone 45mg daily | Vitamin E 800 IU daily         | Placebo              | n/a                      | 37          | 36  | 32  | n/a | 100.0%                                               | 100.0% | 100.0% | n/a   | n/a                                   | n/a    | n/a    | n/a  |

|                                               |                                                    |           |                                      |                                      |         |     |     |    |     |     |        |        |       |     |        |        |        |     |
|-----------------------------------------------|----------------------------------------------------|-----------|--------------------------------------|--------------------------------------|---------|-----|-----|----|-----|-----|--------|--------|-------|-----|--------|--------|--------|-----|
| Harrison et al., 2019 <sup>12</sup>           | NCT02548351, NCT02704403, NCT02912260, NCT03900429 | 36 weeks  | Resmetirom 80mg daily                | Placebo                              | n/a     | n/a | 84  | 41 | n/a | n/a | 42.9%  | 31.7%  | n/a   | n/a | 0.0%   | 0.0%   | n/a    | n/a |
| Navarro et al., 2019 <sup>13</sup>            | NCT00680407                                        | 48 weeks  | Silymarin 700mg                      | Silymarin 420mg                      | Placebo | n/a | 27  | 26 | 25  | n/a | 29.6%  | 23.1%  | 28.0% | n/a | 0.0%   | 0.0%   | 0.0%   | n/a |
| Harrison et al., 2018 cirrhosis <sup>14</sup> | NCT01672866                                        | 96 weeks  | Simtuzumab 700mg IV every other week | Simtuzumab 200mg IV every other week | Placebo | n/a | 86  | 87 | 85  | n/a | 69.8%  | 67.8%  | 70.6% | n/a | 100.0% | 100.0% | 100.0% | n/a |
| Alam et al., 2018 <sup>15</sup>               | n/a                                                | 1 year    | Sitagliptin 100mg daily              | Placebo                              | n/a     | n/a | 20  | 20 | n/a | n/a | 55.0%  | 30.0%  | n/a   | n/a | n/a    | n/a    | n/a    | n/a |
| Harrison et al., 2018 <sup>14</sup>           | NCT01672866                                        | 96 weeks  | Simtuzumab 125mg SQ weekly           | Simtuzumab 75mg SQ weekly            | Placebo | n/a | 74  | 71 | 74  | n/a | 67.6%  | 67.6%  | 66.2% | n/a | 0.0%   | 0.0%   | 0.0%   | n/a |
| McPherson et al., 2018 <sup>16</sup>          | ISRCTN57849521                                     | 96 weeks  | Losartan 50mg daily                  | Placebo                              | n/a     | n/a | 24  | 21 | n/a | n/a | 62.5%  | 57.1%  | n/a   | n/a | 6.7%   | 5.9%   | n/a    | n/a |
| Alam et al., 2017 <sup>17</sup>               | n/a                                                | 1 year    | Pentoxifylline 400mg TID             | Placebo                              | n/a     | n/a | 20  | 10 | n/a | n/a | n/a    | n/a    | n/a   | n/a | n/a    | n/a    | n/a    | n/a |
| Joy et al., 2017 <sup>18</sup>                | NCT01260246                                        | 24 weeks  | Sitagliptin 100mg daily              | Placebo                              | n/a     | n/a | 5   | 5  | n/a | n/a | 100.0% | 100.0% | n/a   | n/a | n/a    | n/a    | n/a    | n/a |
| Armstrong et al., 2016 <sup>19</sup>          | NCT01237119                                        | 48 weeks  | Liraglutide 1.8mg daily              | Placebo                              | n/a     | n/a | 23  | 22 | n/a | n/a | 34.6%  | 30.8%  | n/a   | n/a | n/a    | n/a    | n/a    | n/a |
| Cusi et al., 2016 <sup>20</sup>               | NCT00994682                                        | 18 months | Pioglitazone 45mg daily              | Placebo                              | n/a     | n/a | 50  | 51 | n/a | n/a | 48.0%  | 54.9%  | n/a   | n/a | n/a    | n/a    | n/a    | n/a |
| Nogueira et al., 2016 <sup>21</sup>           | n/a                                                | 6 months  | omega 3 PUFA (EPA 50.4mg) TID        | Placebo                              | n/a     | n/a | 27  | 23 | n/a | n/a | n/a    | n/a    | n/a   | n/a | n/a    | n/a    | n/a    | n/a |
| Alam et al., 2016 <sup>22</sup>               | n/a                                                | 1 year    | Telmisartan 40mg daily               | Placebo                              | n/a     | n/a | 20  | 10 | n/a | n/a | 35.0%  | 10.0%  | n/a   | n/a | n/a    | n/a    | n/a    | n/a |
| Ratziu et al., 2016 <sup>23</sup>             | n/a                                                | 52 weeks  | Elafibranor 120 mg daily             | Elafibranor 80 mg daily              | Placebo | n/a | 89  | 93 | 92  | n/a | 41.6%  | 39.8%  | 35.9% | n/a | 0.0%   | 0.0%   | 0.0%   | n/a |
| Neuschwander-Tetri et al., 2015 <sup>24</sup> | NCT01265498                                        | 72 weeks  | Obeticholic acid 25mg daily          | Placebo                              | n/a     | n/a | 102 | 98 | n/a | n/a | 53.2%  | 52.1%  | n/a   | n/a | 0.0%   | 0.0%   | n/a    | n/a |
| Loomba et al., 2015 <sup>25</sup>             | NCT01766713                                        | 24 weeks  | Ezetimibe 10mg daily                 | Placebo                              | n/a     | n/a | 25  | 25 | n/a | n/a | 28.0%  | 28.0%  | n/a   | n/a | n/a    | n/a    | n/a    | n/a |
| Dasarathy et al., 2015 <sup>26</sup>          | NCT00323414                                        | 48 weeks  | omega 3 PUFA (EPA 2160mg) daily      | Placebo                              | n/a     | n/a | 18  | 19 | n/a | n/a | 100.0% | 100.0% | n/a   | n/a | 0.0%   | 0.0%   | n/a    | n/a |

|                                       |             |           |                                           |                                           |                         |     |    |    |     |     |       |       |       |     |       |       |      |     |
|---------------------------------------|-------------|-----------|-------------------------------------------|-------------------------------------------|-------------------------|-----|----|----|-----|-----|-------|-------|-------|-----|-------|-------|------|-----|
| Argo et al., 2015 <sup>27</sup>       | NCT00681408 | 1 year    | omega 3 PUFA (EPA 1050mg) daily           | Placebo                                   | n/a                     | n/a | 17 | 17 | n/a | n/a | 29.4% | 35.3% | n/a   | n/a | 0.0%  | 0.0%  | n/a  | n/a |
| Sanyal et al., 2014 <sup>28</sup>     | NCT01154985 | 12 months | omega 3 PUFA (EPA 900mg) TID              | omega 3 PUFA (EPA 600mg) TID              | Placebo                 | n/a | 64 | 55 | 55  | n/a | 31.4% | 42.7% | 30.7% | n/a | 0.0%  | 0.0%  | n/a  | n/a |
| Shenoy et al., 2014 <sup>29</sup>     | n/a         | 16 weeks  | Metadoxine 500mg BID                      | Placebo                                   | n/a                     | n/a | 75 | 59 | n/a | n/a | n/a   | n/a   | n/a   | n/a | n/a   | n/a   | n/a  | n/a |
| Sharma et al., 2012 <sup>30</sup>     | n/a         | 6 months  | Pentoxifylline 400mg TID                  | Pioglitazone 30mg daily                   | n/a                     | n/a | 24 | 22 | n/a | n/a | n/a   | n/a   | n/a   | n/a | n/a   | n/a   | n/a  | n/a |
| Le et al., 2012 <sup>31</sup>         | NCT01066364 | 24 weeks  | Colesevelam 3.75g daily                   | Placebo                                   | n/a                     | n/a | 24 | 22 | n/a | n/a | 32.0% | 40.0% | n/a   | n/a | n/a   | n/a   | n/a  | n/a |
| Torres et al., 2011 <sup>32</sup>     | n/a         | 48 weeks  | Rosiglitazone 8mg and Metformin 500mg BID | Rosiglitazone 8mg and Losartan 50mg daily | Rosiglitazone 8mg daily | n/a | 28 | 35 | 26  | n/a | 16.0% | 20.0% | 13.0% | n/a | n/a   | n/a   | n/a  | n/a |
| Zein et al., 2011 <sup>33</sup>       | NCT00590161 | 1 year    | Pentoxifylline 400mg TID                  | Placebo                                   | n/a                     | n/a | 20 | 26 | n/a | n/a | 3.8%  | 13.8% | n/a   | n/a | 0.0%  | 0.0%  | n/a  | n/a |
| van Wagner et al., 2011 <sup>34</sup> | NCT00267670 | 1 year    | Pentoxifylline 400mg TID                  | Placebo                                   | n/a                     | n/a | 19 | 7  | n/a | n/a | 10.0% | 13.0% | n/a   | n/a | 24.0% | 25.0% | n/a  | n/a |
| Leuschner et al., 2010 <sup>35</sup>  | n/a         | 18 months | UDCA 23mg/kg day                          | Placebo                                   | n/a                     | n/a | 69 | 68 | n/a | n/a | 10.5% | 12.1% | n/a   | n/a | 0.0%  | 0.0%  | n/a  | n/a |
| Sanyal et al., 2010 <sup>36</sup>     | NCT00063622 | 96 weeks  | Pioglitazone 30mg daily                   | Vitamin E 800 IU daily                    | Placebo                 | n/a | 80 | 84 | 83  | n/a | 0.0%  | 0.0%  | 0.0%  | n/a | 0.0%  | 0.0%  | 0.0% | n/a |
| Shields et al., 2009 <sup>37</sup>    | n/a         | 1 year    | Metformin 500mg daily                     | Placebo                                   | n/a                     | n/a | 9  | 7  | n/a | n/a | 0.0%  | 0.0%  | n/a   | n/a | n/a   | n/a   | n/a  | n/a |
| Ratziu et al., 2008 <sup>38</sup>     | n/a         | 1 year    | Rosiglitazone 8mg daily                   | Placebo                                   | n/a                     | n/a | 32 | 31 | n/a | n/a | 28.1% | 35.5% | n/a   | n/a | 3.1%  | 3.2%  | n/a  | n/a |

\* = if applicable

## Appendix 3: Network plots of treatment comparisons

e-Figure 1:  $\geq 2$ -point decrease in NAFLD Activity Score [NAS]

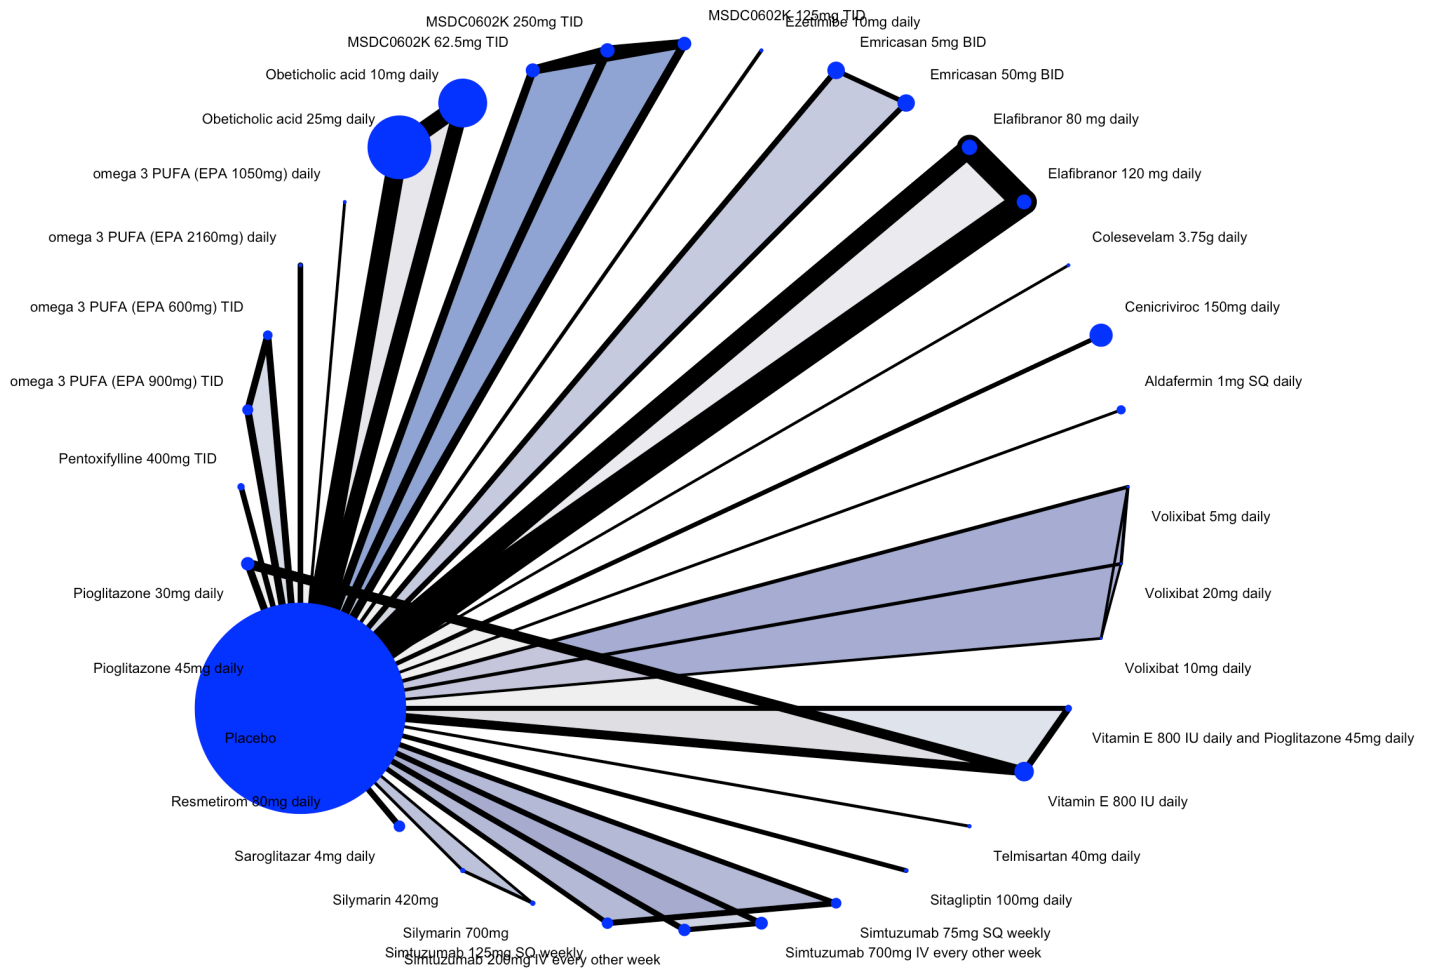

Network plot for patients achieving  $\geq 2$ -point decrease in NAFLD Activity Score [NAS]. The size of each point, or node, corresponds to the total number of patients randomized to each intervention across all studies. Line thickness corresponds to the total number of studies directly comparing the two individual treatments. Shaded areas depict study information derived from multi-arm clinical trials.

e-Figure 2: NASH resolution without worsening fibrosis

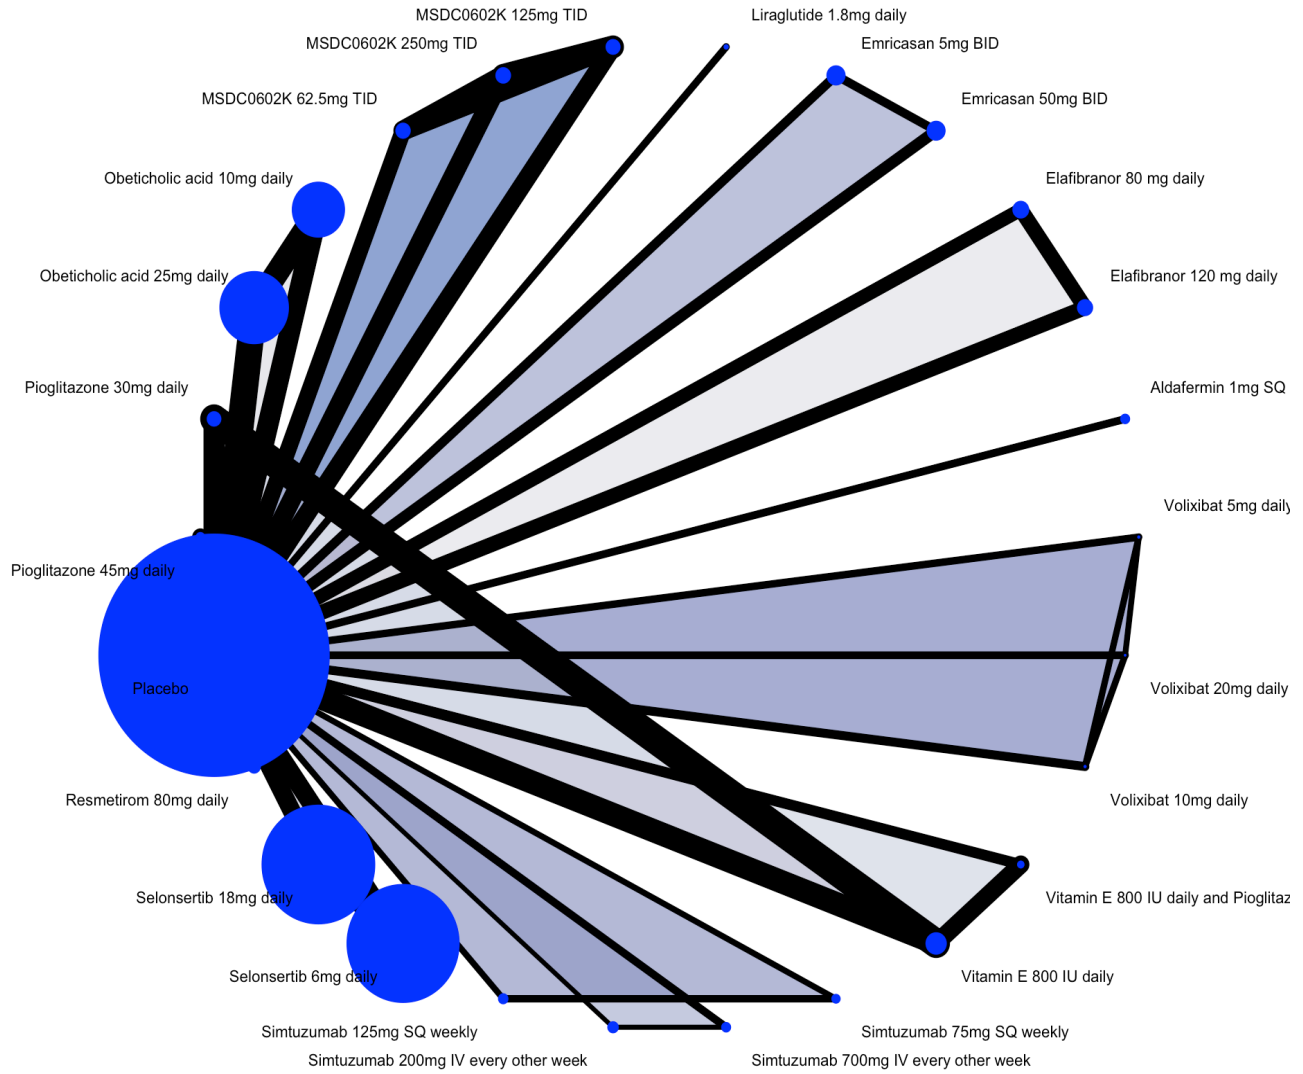

Network plot for patients achieving NASH resolution without worsening fibrosis. The size of each point, or node, corresponds to the total number of patients randomized to each intervention across all studies. Line thickness corresponds to the total number of studies directly comparing the two individual treatments. Shaded areas depict study information derived from multi-arm clinical trials.

e-Figure 3: Fibrosis improvement without worsening NASH

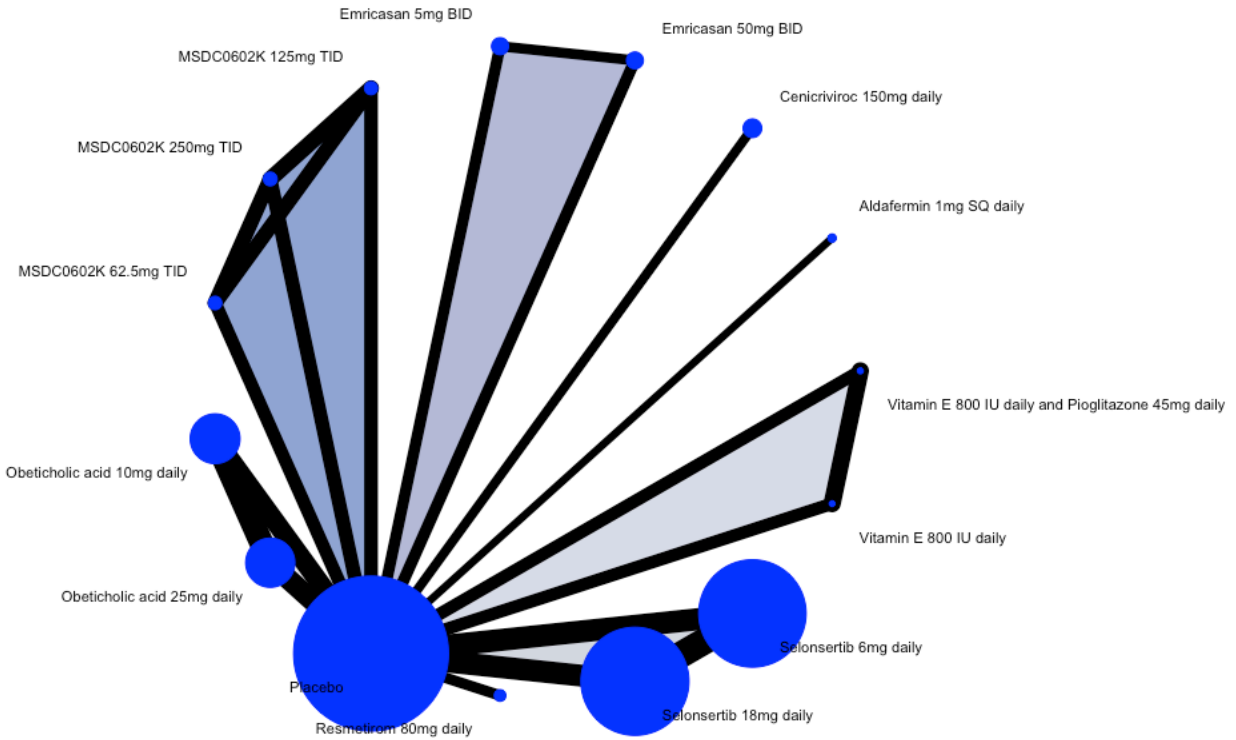

Network plot for patients achieving fibrosis improvement without worsening NASH. The size of each point, or node, corresponds to the total number of patients randomized to each intervention across all studies. Line thickness corresponds to the total number of studies directly comparing the two individual treatments. Shaded areas depict study information derived from multi-arm clinical trials.



e-Figure 4: Fibrosis improvement regardless of NASH progression

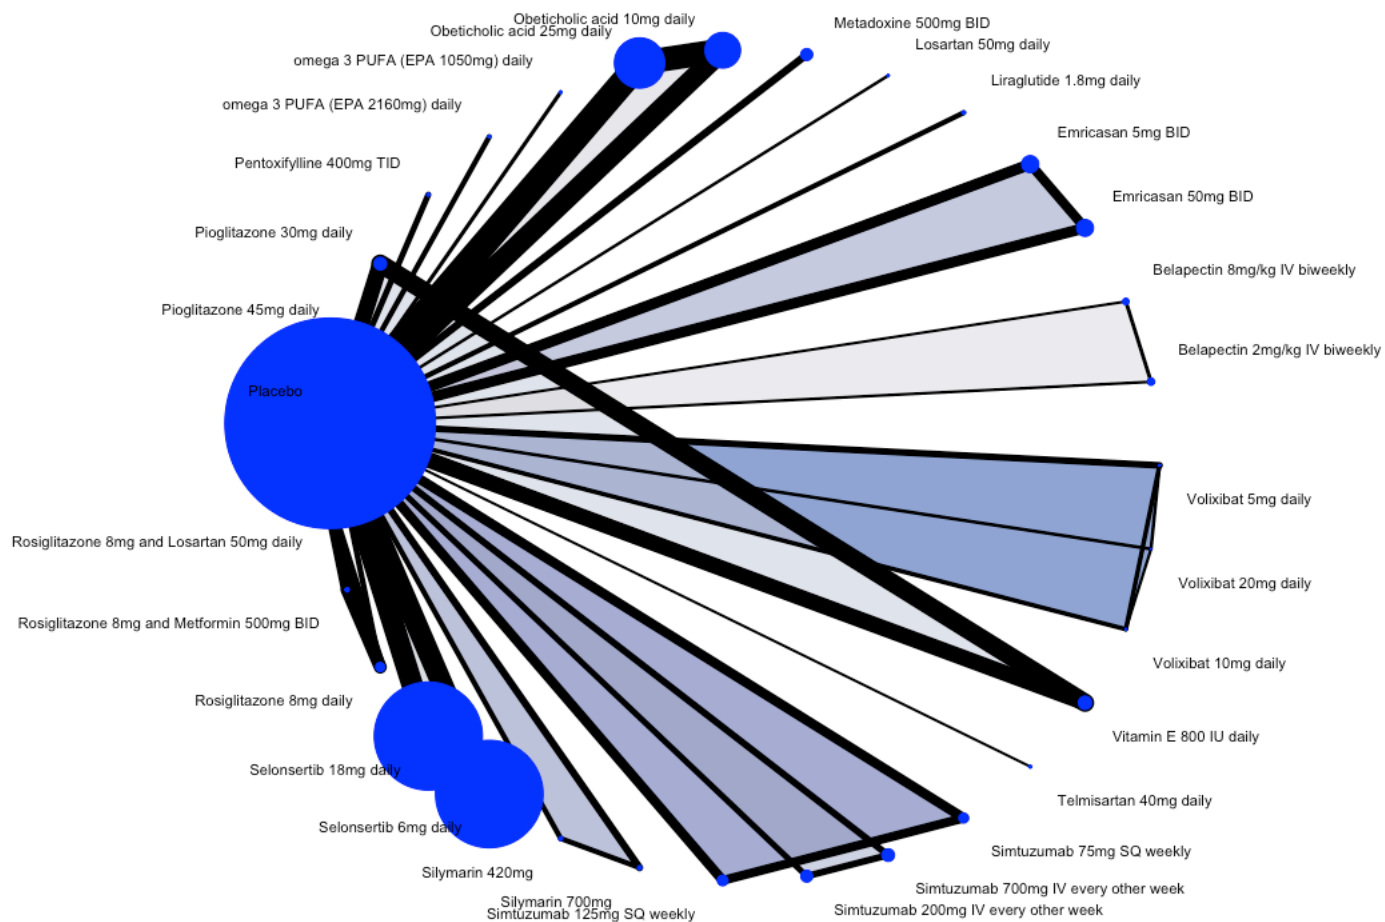

Network plot for patients achieving fibrosis improvement regardless of NASH progression. The size of each point, or node, corresponds to the total number of patients randomized to each intervention across all studies. Line thickness corresponds to the total number of studies directly comparing the two individual treatments. Shaded areas depict study information derived from multi-arm clinical trials.

e-Figure 5: Mean change in NAFLD Activity Score [NAS]

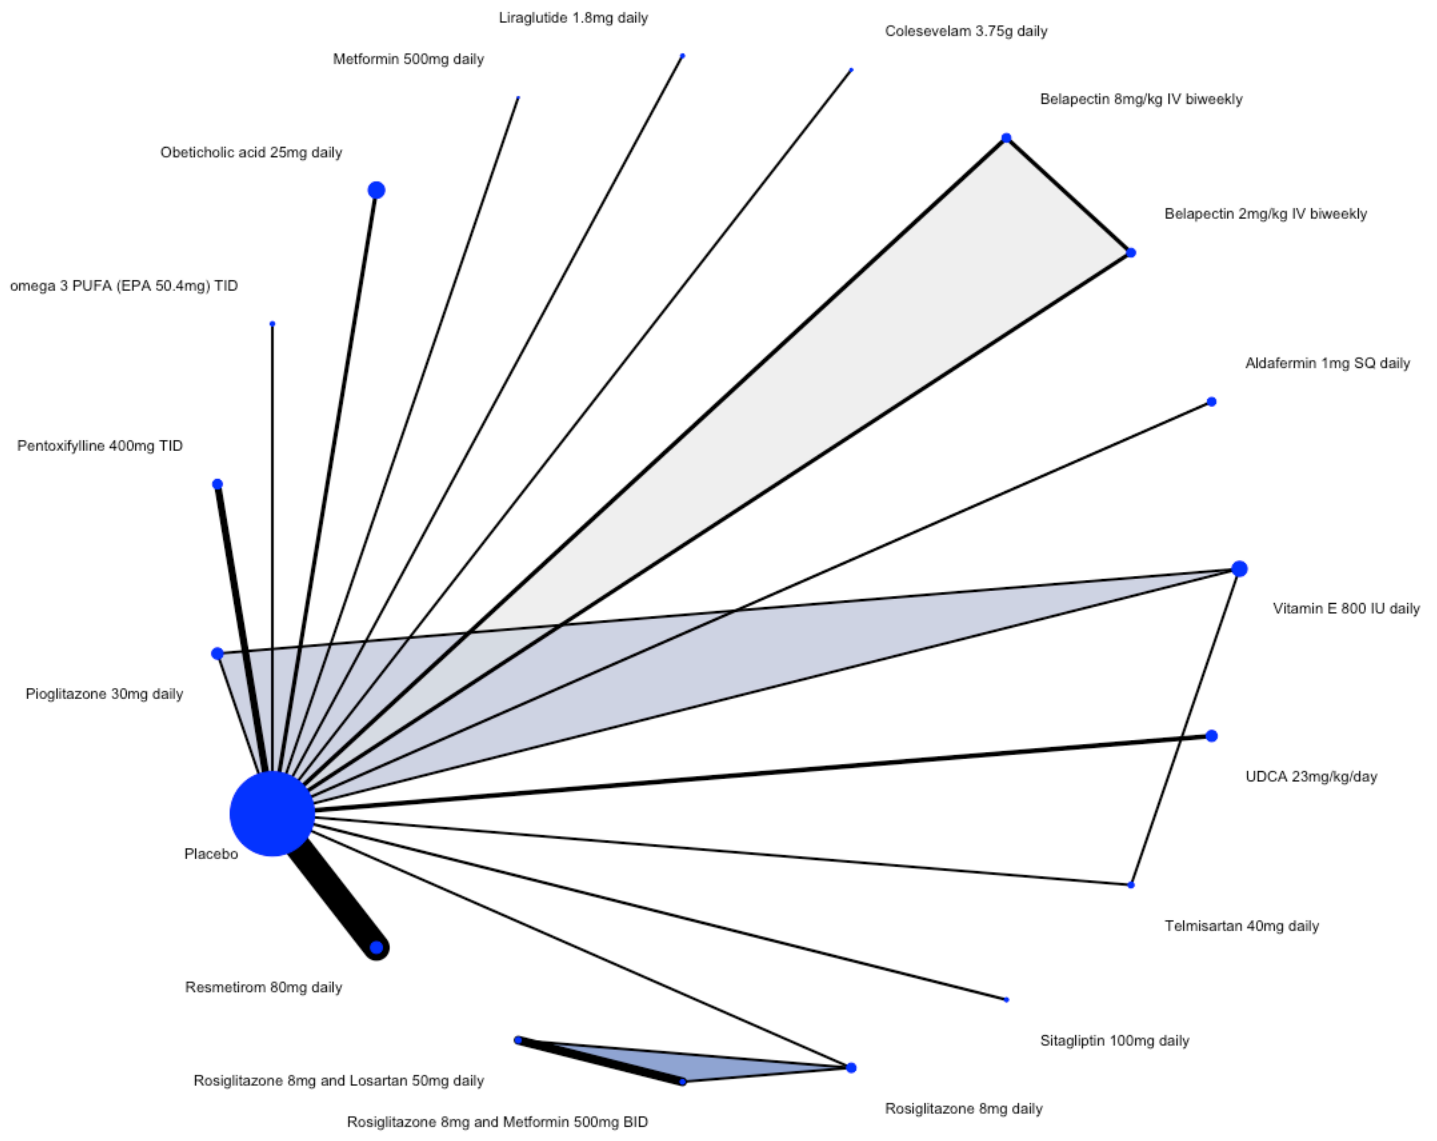

Network plot depicting the mean change in NAFLD activity score [NAS] compared from baseline to end of treatment. The size of each point, or node, corresponds to the total number of patients randomized to each intervention across all studies. Line thickness corresponds to the total number of studies directly comparing the two individual treatments. Shaded areas depict study information derived from multi-arm clinical trials.

e-Figure 6: Mean change in steatosis

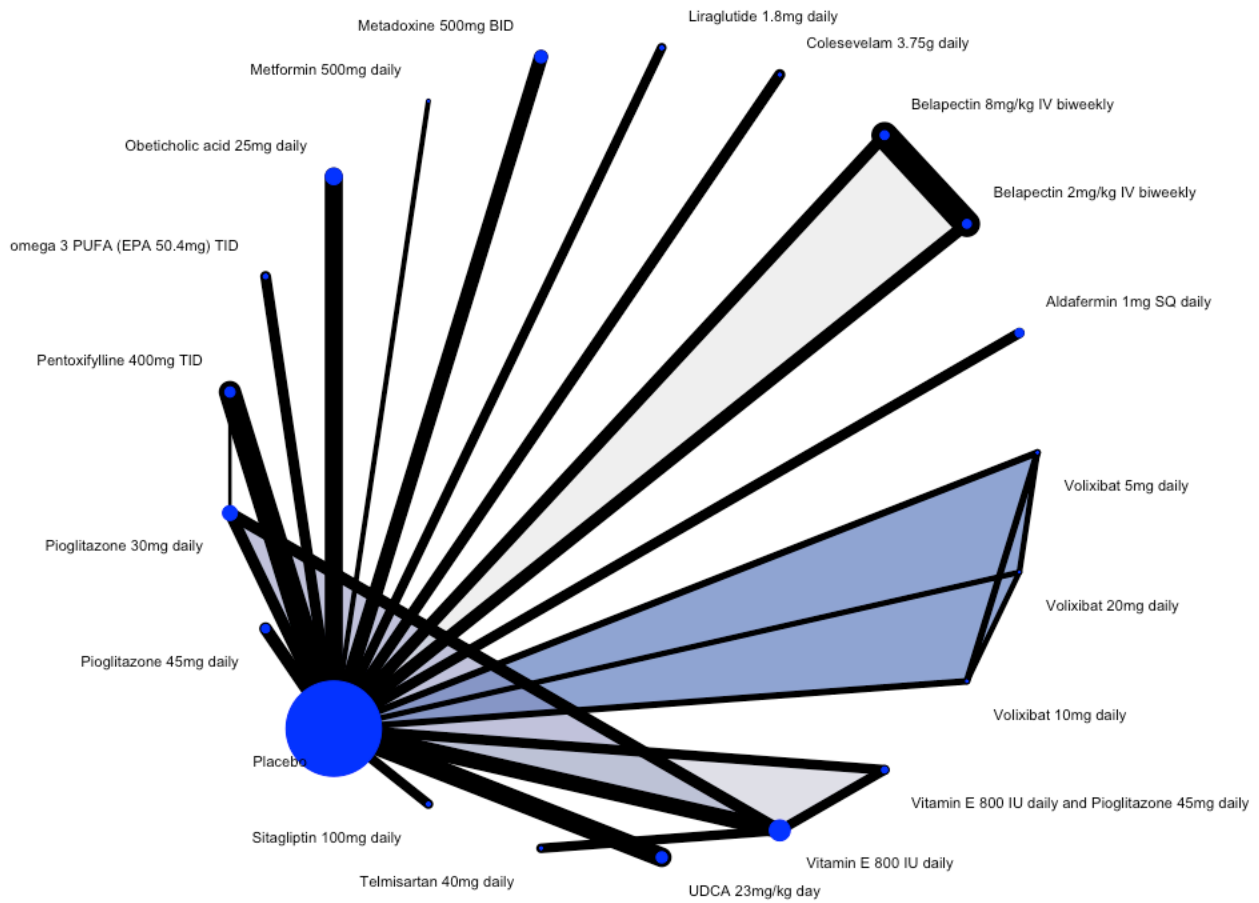

Network plot depicting the mean change in steatosis score compared from baseline to end of treatment. The size of each point, or node, corresponds to the total number of patients randomized to each intervention across all studies. Line thickness corresponds to the total number of studies directly comparing the two individual treatments. Shaded areas depict study information derived from multi-arm clinical trials.

e-Figure 7: Mean change in lobular inflammation

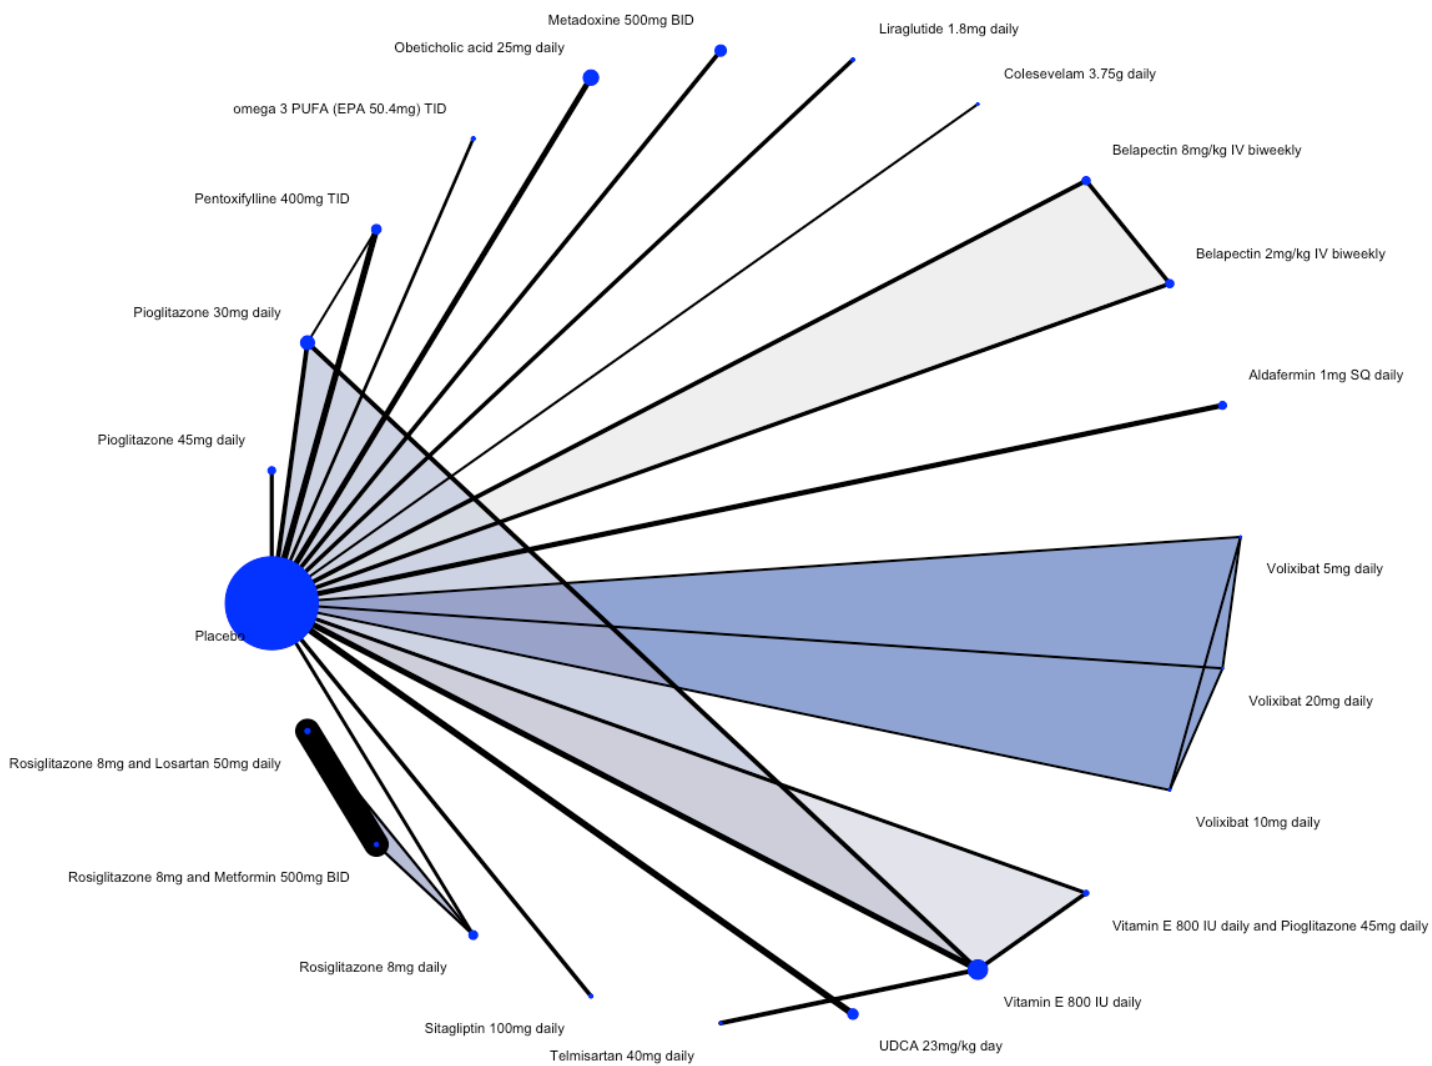

Network plot depicting the mean change in lobular inflammation score compared from baseline to end of treatment. The size of each point, or node, corresponds to the total number of patients randomized to each intervention across all studies. Line thickness corresponds to the total number of studies directly comparing the two individual treatments. Shaded areas depict study information derived from multi-arm clinical trials.

e-Figure 8: Mean change in hepatocellular ballooning

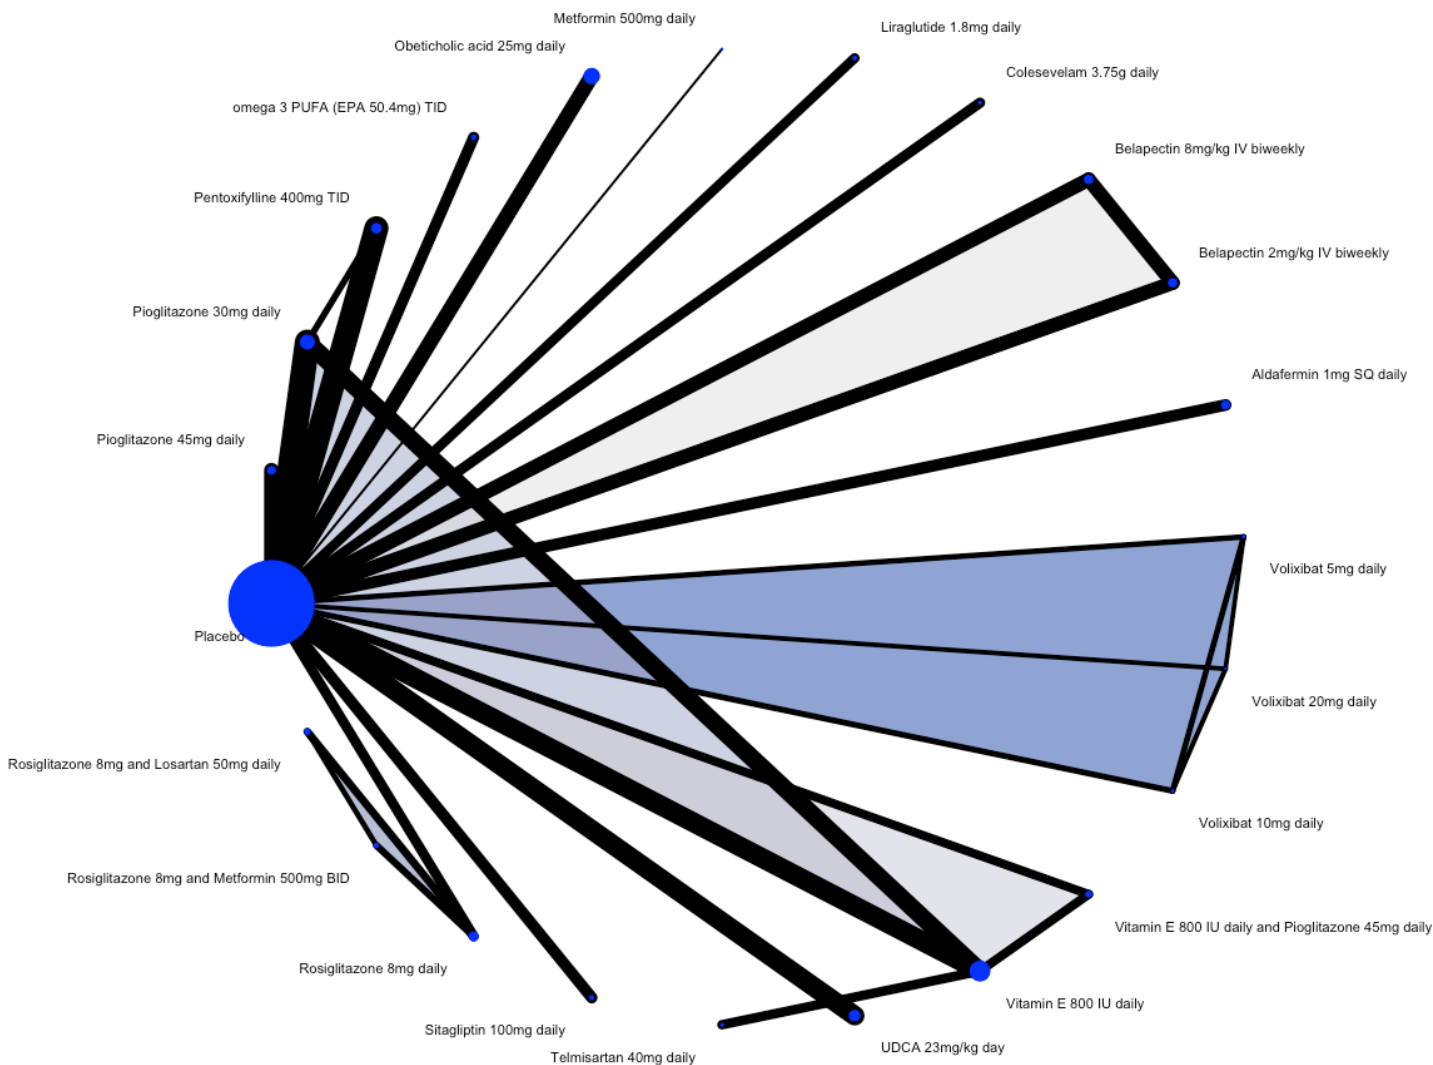

Network plot depicting the mean change in hepatocellular ballooning score compared from baseline to end of treatment. The size of each point, or node, corresponds to the total number of patients randomized to each intervention across all studies. Line thickness corresponds to the total number of studies directly comparing the two individual treatments. Shaded areas depict study information derived from multi-arm clinical trials.

e-Figure 9: Mean change in fibrosis

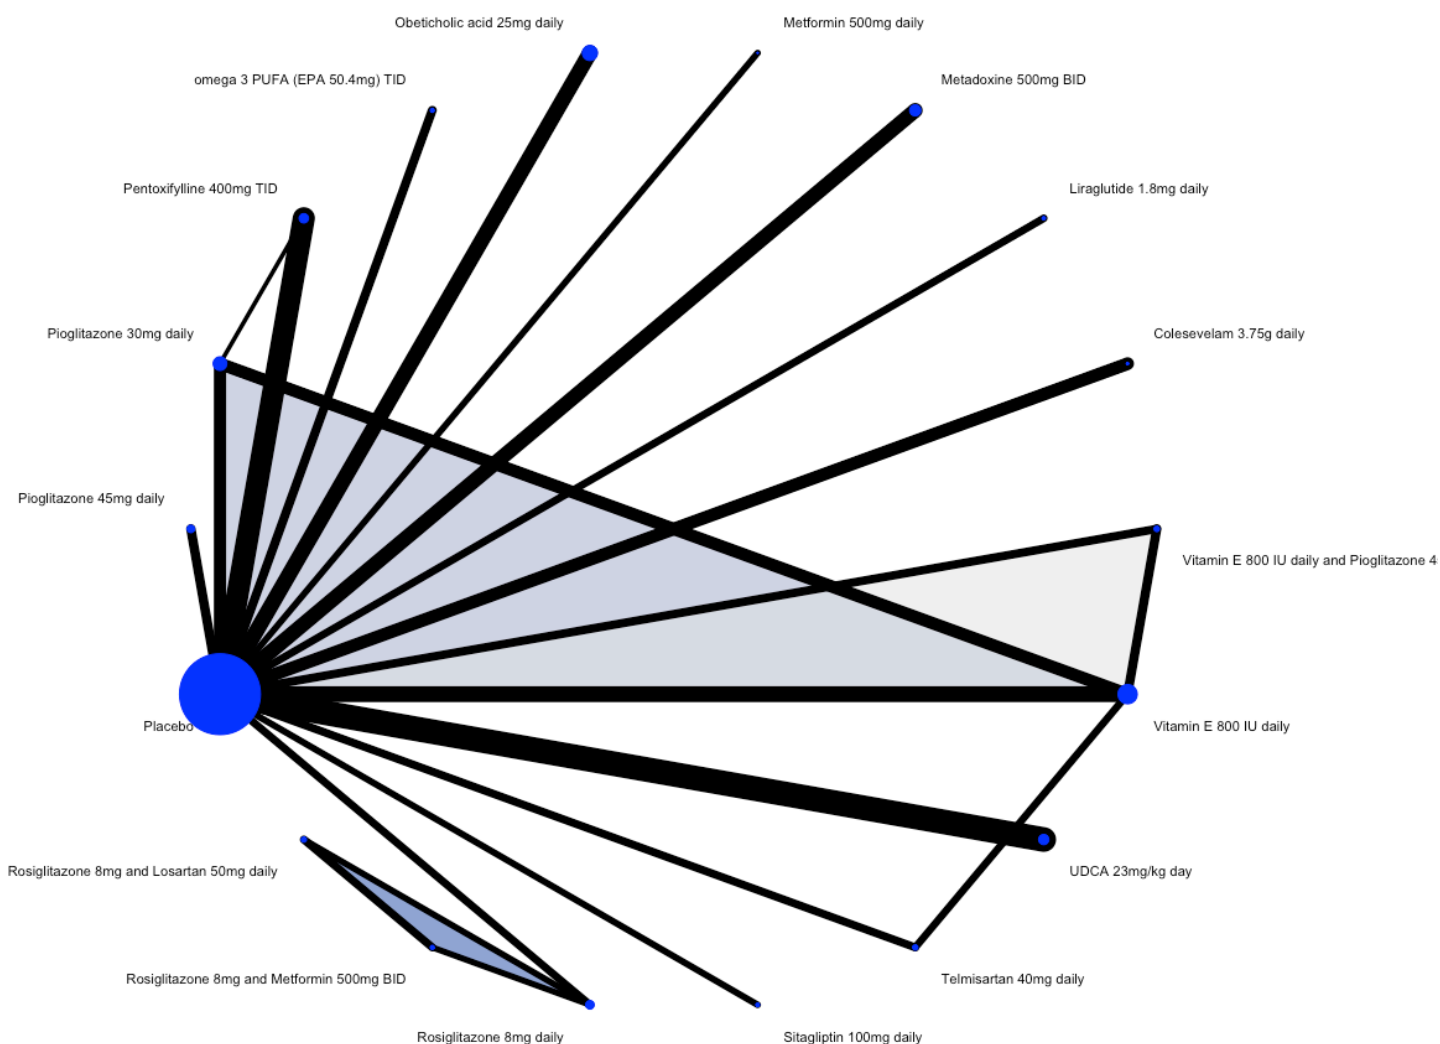

Network plot depicting the mean change in fibrosis score compared from baseline to end of treatment. The size of each point, or node, corresponds to the total number of patients randomized to each intervention across all studies. Line thickness corresponds to the total number of studies directly comparing the two individual treatments. Shaded areas depict study information derived from multi-arm clinical trials.

# Appendix 4: Network meta-analysis results characterized by network league tables

## e-Table 1: ≥ 2-point decrease in NAFLD Activity Score [NAS]

| Alcalofemim<br>1mg SQ<br>daily | Vitamin E<br>800IU daily<br>and<br>Pioglitazone<br>45mg daily | Pioglitazone<br>45mg daily | Pentoxifylin<br>e 400mg TID | Terlistantan<br>40mg daily | Stigilatin<br>500mg daily | 7.69 [2.00,<br>26.57] |
|--------------------------------|---------------------------------------------------------------|----------------------------|-----------------------------|----------------------------|---------------------------|-----------------------|
| 2.38 [0.52,<br>4.88]           | 1.77 [1.00,<br>2.54]                                          |                            |                             |                            |                           | 2.88 [1.32,<br>4.29]  |
| 2.34 [0.53,<br>10.39]          | 1.03 [0.43,<br>2.44]                                          | Pioglitazone<br>45mg daily |                             |                            |                           | 3.20 [1.74,<br>6.23]  |
| 2.71 [0.59,<br>13.35]          | 1.19 [0.48,<br>2.96]                                          | 1.16 [0.45,<br>2.98]       | Pentoxifylin<br>e 400mg TID |                            |                           | 2.84 [1.41,<br>5.73]  |
| 2.37 [0.37,<br>15.38]          | 1.04 [0.25,<br>4.53]                                          | 1.05 [0.24,<br>4.29]       | 1.07 [0.20,<br>3.70]        | Terlistantan<br>40mg daily |                           | 3.25 [0.80,<br>11.70] |
| 2.86 [0.61,<br>14.33]          | 1.50 [0.47,<br>3.57]                                          | 1.26 [0.45,<br>3.59]       | 1.09 [0.37,<br>3.73]        | 1.25 [0.27,<br>3.73]       | Stigilatin<br>500mg daily | 2.60 [1.14,<br>5.51]  |
| 2.67 [0.38,<br>18.60]          | 1.17 [0.26,<br>5.33]                                          | 1.14 [0.24,<br>5.33]       | 0.99 [0.21,<br>4.73]        | 1.13 [0.17,<br>4.59]       | 0.90 [0.18,<br>3.75]      | 2.88 [1.70,<br>4.73]  |
| 1.82 [0.77,<br>5.22]           | 1.50 [0.63,<br>3.99]                                          | 1.46 [0.59,<br>3.82]       | 1.20 [0.49,<br>3.26]        | 1.44 [0.34,<br>6.00]       | 1.18 [0.41,<br>3.26]      | 2.25 [1.16,<br>4.29]  |
| 1.74 [0.91,<br>3.61]           | 1.64 [0.97,<br>2.77]                                          | 1.60 [0.74,<br>3.40]       | 1.18 [0.61,<br>3.10]        | 1.58 [0.41,<br>3.21]       | 1.26 [0.50,<br>3.09]      | 2.06 [1.13,<br>3.53]  |
| 4.15 [0.89,<br>19.39]          | 1.83 [0.70,<br>4.72]                                          | 1.77 [0.66,<br>4.75]       | 1.13 [0.55,<br>4.28]        | 1.75 [0.40,<br>4.28]       | 1.40 [0.46,<br>4.28]      | 1.85 [0.87,<br>3.51]  |
| 4.43 [1.04,<br>18.81]          | 1.94 [0.89,<br>4.28]                                          | 1.89 [0.83,<br>4.33]       | 1.64 [0.68,<br>3.93]        | 1.87 [0.47,<br>4.48]       | 1.50 [0.56,<br>3.98]      | 1.71 [1.03,<br>2.94]  |
| 4.73 [1.21,<br>18.47]          | 2.08 [1.11,<br>3.87]                                          | 2.02 [1.03,<br>3.95]       | 1.75 [0.84,<br>3.63]        | 2.00 [0.55,<br>3.74]       | 1.60 [0.68,<br>3.73]      | 1.63 [1.12,<br>2.71]  |
| 4.66 [1.11,<br>16.63]          | 2.05 [1.09,<br>3.86]                                          | 1.99 [0.88,<br>4.48]       | 1.72 [0.73,<br>4.40]        | 1.97 [0.50,<br>4.52]       | 1.58 [0.60,<br>4.52]      | 1.75 [1.02,<br>2.86]  |
| 4.80 [1.73,<br>31.68]          | 2.13 [0.50,<br>8.99]                                          | 2.05 [0.47,<br>8.99]       | 1.77 [0.40,<br>7.92]        | 2.03 [0.32,<br>7.70]       | 1.62 [0.34,<br>7.36]      | 1.60 [0.43,<br>6.01]  |
| 5.17 [1.00,<br>24.51]          | 2.27 [0.86,<br>6.02]                                          | 2.21 [0.81,<br>6.02]       | 1.89 [0.67,<br>6.45]        | 2.18 [0.49,<br>6.45]       | 1.79 [0.46,<br>6.45]      | 1.49 [0.68,<br>3.25]  |
| 5.70 [1.47,<br>22.50]          | 2.50 [1.17,<br>4.98]                                          | 2.41 [1.10,<br>4.99]       | 2.10 [1.03,<br>4.31]        | 2.44 [0.86,<br>4.40]       | 1.93 [0.83,<br>4.40]      | 1.35 [1.15,<br>1.58]  |
| 5.78 [1.40,<br>23.83]          | 2.44 [1.22,<br>5.27]                                          | 2.47 [1.14,<br>5.36]       | 2.14 [0.94,<br>4.88]        | 2.44 [0.63,<br>4.97]       | 1.96 [0.77,<br>4.97]      | 1.33 [0.87,<br>2.06]  |
| 5.89 [1.50,<br>23.54]          | 2.39 [1.17,<br>4.88]                                          | 2.52 [1.27,<br>4.99]       | 2.18 [1.04,<br>4.58]        | 2.49 [0.68,<br>4.57]       | 1.89 [0.84,<br>4.57]      | 1.34 [0.95,<br>1.60]  |
| 5.77 [0.86,<br>38.49]          | 2.53 [0.56,<br>10.91]                                         | 2.47 [0.56,<br>10.82]      | 2.13 [0.47,<br>9.65]        | 2.44 [0.38,<br>9.38]       | 1.95 [0.41,<br>9.40]      | 1.33 [0.35,<br>5.08]  |
| 6.23 [0.90,<br>43.30]          | 2.74 [0.60,<br>12.42]                                         | 2.66 [0.57,<br>12.39]      | 2.30 [0.48,<br>10.93]       | 2.63 [0.40,<br>10.93]      | 2.11 [0.42,<br>10.93]     | 1.29 [0.31,<br>4.98]  |
| 6.95 [1.67,<br>28.89]          | 3.05 [1.44,<br>6.54]                                          | 2.97 [1.35,<br>6.54]       | 2.57 [1.11,<br>6.09]        | 3.09 [0.75,<br>6.09]       | 2.35 [0.91,<br>6.09]      | 1.11 [0.70,<br>1.77]  |
| 7.26 [1.32,<br>40.01]          | 3.19 [0.99,<br>10.99]                                         | 3.10 [0.94,<br>10.99]      | 2.68 [0.76,<br>9.46]        | 3.07 [0.59,<br>9.46]       | 2.66 [0.65,<br>9.46]      | 1.06 [0.37,<br>3.92]  |
| 7.89 [1.36,<br>45.73]          | 3.47 [0.97,<br>12.35]                                         | 3.39 [0.92,<br>12.32]      | 2.81 [0.77,<br>11.00]       | 3.33 [0.60,<br>11.00]      | 2.67 [0.66,<br>11.00]     | 0.98 [0.32,<br>3.62]  |
| 7.80 [1.58,<br>38.83]          | 3.41 [1.21,<br>9.71]                                          | 3.31 [1.14,<br>9.71]       | 2.88 [0.95,<br>8.75]        | 3.30 [0.76,<br>8.75]       | 2.88 [0.95,<br>8.75]      | 0.99 [0.42,<br>3.29]  |
| 8.14 [1.48,<br>44.63]          | 3.57 [1.08,<br>11.80]                                         | 3.48 [1.03,<br>11.79]      | 3.01 [0.86,<br>10.54]       | 3.44 [0.66,<br>10.54]      | 2.75 [0.73,<br>10.54]     | 0.95 [0.33,<br>3.60]  |
| 8.22 [1.94,<br>32.30]          | 3.81 [1.58,<br>7.20]                                          | 3.78 [1.48,<br>7.20]       | 2.84 [1.21,<br>6.44]        | 3.75 [1.03,<br>6.44]       | 2.81 [1.21,<br>6.44]      | 1.01 [0.83,<br>1.24]  |
| 7.69 [2.00,<br>29.57]          | 3.88 [1.88,<br>6.07]                                          | 3.89 [1.74,<br>6.29]       | 2.91 [1.24,<br>6.29]        | 3.75 [0.90,<br>6.29]       | 2.90 [1.14,<br>6.29]      | 1.07 [0.53,<br>3.18]  |
| 7.78 [1.96,<br>30.53]          | 3.61 [1.84,<br>6.33]                                          | 3.52 [1.70,<br>6.33]       | 2.87 [1.39,<br>6.33]        | 3.59 [0.90,<br>6.33]       | 2.87 [1.39,<br>6.33]      | 1.04 [0.43,<br>3.18]  |
| 8.21 [2.00,<br>46.88]          | 4.05 [1.79,<br>9.31]                                          | 3.94 [1.67,<br>9.31]       | 3.41 [1.38,<br>8.40]        | 3.90 [0.96,<br>8.40]       | 3.12 [1.14,<br>8.40]      | 1.09 [0.65,<br>3.18]  |
| 10.02 [2.31,<br>46.88]         | 4.17 [1.87,<br>11.15]                                         | 4.44 [1.76,<br>11.15]      | 3.81 [1.45,<br>8.40]        | 4.39 [1.03,<br>11.15]      | 3.11 [1.21,<br>8.40]      | 1.14 [0.54,<br>2.41]  |
| 11.83 [2.59,<br>53.79]         | 5.19 [2.09,<br>12.89]                                         | 5.05 [1.96,<br>12.89]      | 4.36 [1.62,<br>11.70]       | 4.99 [1.16,<br>11.70]      | 3.99 [1.36,<br>11.70]     | 1.28 [0.52,<br>2.41]  |
| 16.72 [2.28,<br>135.90]        | 7.71 [3.12,<br>19.50]                                         | 6.91 [3.05,<br>19.50]      | 6.01 [2.22,<br>19.50]       | 6.88 [1.01,<br>19.50]      | 6.10 [0.82,<br>19.50]     | 1.56 [0.32,<br>4.07]  |
| 13.54 [2.86,<br>61.94]         | 5.98 [2.56,<br>24.72]                                         | 5.90 [2.47,<br>24.81]      | 5.01 [1.87,<br>24.81]       | 5.77 [1.33,<br>24.81]      | 5.01 [1.00,<br>24.81]     | 1.47 [0.40,<br>3.99]  |
| 14.25 [3.24,<br>67.82]         | 6.89 [2.57,<br>16.46]                                         | 6.80 [2.45,<br>16.46]      | 5.85 [2.00,<br>14.85]       | 6.81 [1.45,<br>14.85]      | 4.99 [1.67,<br>14.85]     | 1.25 [0.46,<br>4.49]  |

Summary of treatment effects of network meta-analysis presented in league table for patients achieving ≥ 2-point decrease in NAFLD Activity Score [NAS]. Network estimates are derived using a random effects model and reported as relative risk [RR] with 95% confidence interval [CI]. The league table should be read between comparisons as column versus row and read left to right. Treatments are ranked from worst to best along the leading diagonal, based upon P-scores and relative treatment ranking, with treatment in top left position representing the superior rank. Estimates above the leading diagonal are based upon meta-analysis in league table comparisons, whereas estimates below the leading diagonal represent the total network estimate after indirect evidence but are not included. Estimates highlighted in green represent statistically significant findings.

e-Table 2: NASH resolution without worsening fibrosis

|  |                               |                            |                            |                                                                |                            |                       |                           |                       |                       |                       |                        |                                   |                       |                        |                           |                       |                         |                       |                                               |                       |                       |                       |                       |                       |                       |                       |                       |                      |
|--|-------------------------------|----------------------------|----------------------------|----------------------------------------------------------------|----------------------------|-----------------------|---------------------------|-----------------------|-----------------------|-----------------------|------------------------|-----------------------------------|-----------------------|------------------------|---------------------------|-----------------------|-------------------------|-----------------------|-----------------------------------------------|-----------------------|-----------------------|-----------------------|-----------------------|-----------------------|-----------------------|-----------------------|-----------------------|----------------------|
|  | Aldafermin<br>1mg SQ<br>daily |                            |                            |                                                                |                            |                       |                           |                       |                       |                       |                        |                                   |                       |                        |                           |                       |                         |                       |                                               |                       |                       | 5.77 [1.48;<br>22.51] |                       |                       |                       |                       |                       |                      |
|  | 1.34 [0.19;<br>9.56]          | Liraglutide<br>1.8mg daily |                            |                                                                |                            |                       |                           |                       |                       |                       |                        |                                   |                       |                        |                           |                       |                         |                       |                                               |                       |                       | 4.30 [1.04;<br>17.74] |                       |                       |                       |                       |                       |                      |
|  | 2.18 [0.49;<br>9.69]          | 1.62 [0.35;<br>7.61]       | Pioglitazone<br>45mg daily |                                                                |                            |                       |                           |                       |                       |                       |                        |                                   |                       |                        |                           |                       |                         |                       |                                               |                       |                       | 2.65 [1.43;<br>4.91]  |                       |                       |                       |                       |                       |                      |
|  | 2.19 [0.48;<br>9.94]          | 1.63 [0.34;<br>7.80]       | 1.01 [0.41;<br>2.49]       | Vitamin E<br>800 IU daily<br>and<br>Pioglitazone<br>45mg daily |                            |                       | 1.30 [0.72;<br>2.34]      |                       |                       |                       |                        |                                   |                       |                        |                           |                       |                         |                       |                                               |                       |                       | 3.46 [1.29;<br>9.29]  |                       |                       |                       |                       |                       |                      |
|  | 2.35 [0.56;<br>9.87]          | 1.75 [0.40;<br>7.76]       | 1.08 [0.50;<br>2.32]       | 1.07 [0.56;<br>2.05]                                           | Pioglitazone<br>30mg daily |                       | 1.33 [0.92;<br>1.92]      |                       |                       |                       |                        |                                   |                       |                        |                           |                       |                         |                       |                                               |                       |                       | 2.32 [1.43;<br>3.76]  |                       |                       |                       |                       |                       |                      |
|  | 2.73 [0.41;<br>18.33]         | 2.03 [0.29;<br>14.23]      | 1.25 [0.29;<br>5.44]       | 1.25 [0.28;<br>5.53]                                           | 1.16 [0.28;<br>4.75]       | 1.11 [0.27;<br>4.56]  | 1.01 [0.17;<br>4.94]      | 1.16 [0.27;<br>4.94]  |                       |                       |                        |                                   |                       |                        |                           |                       |                         |                       |                                               |                       |                       | 2.12 [0.56;<br>8.02]  |                       |                       |                       |                       |                       |                      |
|  | 3.04 [0.72;<br>12.79]         | 2.27 [0.51;<br>10.05]      | 1.40 [0.65;<br>3.01]       | 1.39 [0.79;<br>2.44]                                           | 1.30 [0.90;<br>1.86]       | 1.11 [0.27;<br>4.56]  | Vitamin E<br>800 IU daily |                       |                       |                       |                        |                                   |                       |                        |                           |                       |                         |                       |                                               |                       |                       | 1.90 [1.20;<br>3.00]  |                       |                       |                       |                       |                       |                      |
|  | 2.64 [0.31;<br>22.58]         | 1.97 [0.22;<br>17.46]      | 1.22 [0.21;<br>7.12]       | 1.21 [0.20;<br>7.21]                                           | 1.13 [0.20;<br>6.29]       | 0.97 [0.12;<br>8.13]  | 0.87 [0.16;<br>4.86]      | 1.16 [0.27;<br>4.94]  | 1.16 [0.27;<br>4.94]  |                       |                        |                                   |                       |                        |                           |                       |                         |                       |                                               |                       |                       | 2.18 [0.42;<br>11.45] |                       |                       |                       |                       |                       |                      |
|  | 3.08 [0.34;<br>28.22]         | 2.30 [0.24;<br>21.78]      | 1.41 [0.22;<br>9.03]       | 1.41 [0.22;<br>9.13]                                           | 1.31 [0.22;<br>7.99]       | 1.13 [0.13;<br>10.17] | 1.01 [0.17;<br>6.17]      | 1.16 [0.27;<br>4.94]  |                       |                       |                        |                                   |                       |                        |                           |                       |                         |                       |                                               |                       |                       | 1.88 [0.33;<br>10.77] |                       |                       |                       |                       |                       |                      |
|  | 3.61 [0.78;<br>16.69]         | 2.69 [0.56;<br>13.08]      | 1.66 [0.65;<br>4.22]       | 1.65 [0.63;<br>4.33]                                           | 1.54 [0.67;<br>3.55]       | 1.32 [0.29;<br>5.97]  | 1.19 [0.51;<br>2.74]      | 1.37 [0.23;<br>7.72]  | 1.17 [0.18;<br>7.72]  |                       |                        |                                   |                       |                        | 1.48 [0.75;<br>2.92]      |                       |                         |                       |                                               |                       |                       | 1.60 [0.79;<br>3.22]  |                       |                       |                       |                       |                       |                      |
|  | 3.72 [0.86;<br>16.17]         | 2.78 [0.61;<br>12.70]      | 1.71 [0.75;<br>3.91]       | 1.70 [0.72;<br>4.03]                                           | 1.59 [0.78;<br>3.24]       | 1.37 [0.32;<br>5.77]  | 1.23 [0.60;<br>2.51]      | 1.41 [0.25;<br>8.08]  | 1.21 [0.19;<br>7.57]  | 1.03 [0.42;<br>2.51]  | MSDC0602K<br>250mg TID |                                   | 1.12 [0.70;<br>1.78]  |                        | 1.55 [0.92;<br>2.63]      |                       |                         |                       |                                               |                       |                       | 1.55 [0.89;<br>2.68]  |                       |                       |                       |                       |                       |                      |
|  | 3.81 [0.92;<br>15.65]         | 2.84 [0.65;<br>12.32]      | 1.75 [0.85;<br>3.62]       | 1.74 [0.81;<br>3.74]                                           | 1.62 [0.89;<br>2.94]       | 1.40 [0.35;<br>5.99]  | 1.25 [0.69;<br>2.28]      | 1.44 [0.26;<br>7.89]  | 1.24 [0.21;<br>7.41]  | 1.05 [0.47;<br>2.34]  | 1.02 [0.52;<br>2.00]   | Obeticholic<br>acid 25mg<br>daily | 1.04 [0.67;<br>1.61]  |                        |                           |                       |                         |                       |                                               |                       |                       | 1.52 [1.03;<br>2.23]  |                       |                       |                       |                       |                       |                      |
|  | 4.03 [0.96;<br>18.24]         | 3.01 [0.68;<br>13.31]      | 1.85 [0.86;<br>3.99]       | 1.84 [0.82;<br>4.12]                                           | 1.72 [0.90;<br>3.27]       | 1.48 [0.36;<br>6.05]  | 1.33 [0.70;<br>2.53]      | 1.52 [0.27;<br>8.50]  | 1.31 [0.22;<br>7.98]  | 1.12 [0.48;<br>2.21]  | 1.08 [0.53;<br>1.61]   | Obeticholic<br>acid 10mg<br>daily |                       |                        |                           |                       |                         |                       |                                               |                       |                       | 1.40 [0.86;<br>2.27]  |                       |                       |                       |                       |                       |                      |
|  | 4.17 [0.95;<br>18.44]         | 3.11 [0.68;<br>14.32]      | 1.92 [0.83;<br>4.44]       | 1.91 [0.80;<br>4.57]                                           | 1.78 [0.86;<br>3.68]       | 1.53 [0.36;<br>6.51]  | 1.37 [0.66;<br>2.85]      | 1.58 [0.27;<br>9.10]  | 1.36 [0.22;<br>8.52]  | 1.15 [0.47;<br>2.85]  | 1.12 [0.70;<br>1.78]   | 1.10 [0.55;<br>2.18]              | 1.03 [0.50;<br>2.14]  | MSDC0602K<br>125mg TID |                           | 1.39 [0.80;<br>2.40]  |                         |                       |                                               |                       |                       | 1.38 [0.78;<br>2.45]  |                       |                       |                       |                       |                       |                      |
|  | 4.53 [0.92;<br>22.22]         | 3.38 [0.66;<br>17.38]      | 2.08 [0.74;<br>5.82]       | 2.07 [0.72;<br>5.96]                                           | 1.93 [0.75;<br>4.94]       | 1.66 [0.35;<br>7.95]  | 1.49 [0.58;<br>3.82]      | 1.71 [0.27;<br>10.90] | 1.47 [0.21;<br>10.16] | 1.25 [0.43;<br>3.69]  | 1.22 [0.45;<br>3.27]   | 1.19 [0.48;<br>2.95]              | 1.12 [0.44;<br>2.88]  | 1.09 [0.40;<br>2.95]   | Resmetirrom<br>80mg daily |                       |                         |                       |                                               |                       |                       | 1.27 [0.56;<br>2.90]  |                       |                       |                       |                       |                       |                      |
|  | 5.35 [1.12;<br>25.49]         | 3.99 [0.80;<br>19.95]      | 2.46 [0.92;<br>6.57]       | 2.44 [0.89;<br>6.73]                                           | 2.28 [0.93;<br>5.55]       | 1.96 [0.42;<br>9.12]  | 1.76 [0.72;<br>4.29]      | 2.02 [0.33;<br>12.55] | 1.74 [0.26;<br>11.72] | 1.44 [0.56;<br>2.92]  | 1.40 [0.60;<br>3.68]   | 1.33 [0.54;<br>3.31]              | 1.28 [0.49;<br>3.33]  | 1.18 [0.38;<br>3.63]   | 80 mg daily               |                       | 1.08 [0.50;<br>2.32]    |                       |                                               |                       |                       | 1.08 [0.50;<br>2.32]  |                       |                       |                       |                       |                       |                      |
|  | 5.78 [1.29;<br>25.79]         | 4.31 [0.92;<br>20.23]      | 2.66 [1.11;<br>6.37]       | 2.64 [1.07;<br>6.55]                                           | 2.46 [1.14;<br>5.32]       | 2.12 [0.49;<br>9.22]  | 1.90 [0.88;<br>4.11]      | 2.19 [0.37;<br>12.82] | 1.88 [0.19;<br>12.01] | 1.60 [0.63;<br>2.63]  | 1.55 [0.92;<br>3.15]   | 1.52 [0.73;<br>3.15]              | 1.43 [0.66;<br>3.09]  | 1.39 [0.80;<br>2.40]   | 1.28 [0.46;<br>2.90]      | 1.08 [0.40;<br>2.50]  | MSDC0602K<br>62.5mg TID | 1.00 [0.54;<br>1.86]  |                                               |                       |                       |                       |                       |                       |                       |                       |                       |                      |
|  | 5.77 [1.48;<br>22.51]         | 4.30 [1.04;<br>17.74]      | 2.65 [1.43;<br>4.91]       | 2.64 [1.36;<br>4.91]                                           | 2.46 [1.56;<br>3.88]       | 2.12 [0.56;<br>8.02]  | 1.90 [1.20;<br>11.45]     | 1.87 [0.33;<br>10.77] | 1.80 [0.33;<br>10.77] | 1.60 [0.79;<br>3.22]  | 1.55 [0.89;<br>2.68]   | 1.52 [1.03;<br>2.26]              | 1.43 [0.91;<br>2.46]  | 1.38 [0.78;<br>2.45]   | 1.27 [0.56;<br>2.90]      | 1.08 [0.50;<br>1.86]  | 1.00 [0.54;<br>1.86]    | Placebo               | 1.41 [0.43;<br>4.61]                          | 1.54 [0.39;<br>6.14]  | 1.59 [0.64;<br>3.93]  | 1.60 [0.91;<br>2.79]  | 2.12 [0.51;<br>8.84]  | 1.78 [1.01;<br>3.15]  | 3.33 [0.36;<br>31.06] | 2.80 [0.92;<br>8.52]  |                       |                      |
|  | 8.14 [1.34;<br>49.46]         | 6.07 [0.96;<br>38.48]      | 3.74 [0.98;<br>14.22]      | 3.72 [0.96;<br>14.46]                                          | 3.47 [0.97;<br>12.34]      | 2.98 [0.50;<br>17.55] | 2.68 [0.75;<br>9.53]      | 3.08 [0.40;<br>21.86] | 2.64 [0.32;<br>21.86] | 2.25 [0.57;<br>8.93]  | 2.18 [0.59;<br>8.06]   | 2.14 [0.62;<br>7.43]              | 2.02 [0.57;<br>7.18]  | 1.95 [0.52;<br>7.27]   | 1.80 [0.42;<br>7.60]      | 1.52 [0.37;<br>6.24]  | 1.41 [0.37;<br>5.36]    | 1.41 [0.43;<br>4.61]  | Volixibat<br>10mg daily                       | 1.09 [0.23;<br>5.09]  |                       |                       |                       | 1.50 [0.31;<br>7.30]  |                       |                       |                       |                      |
|  | 8.88 [1.27;<br>61.81]         | 6.62 [0.91;<br>47.95]      | 4.08 [0.90;<br>18.55]      | 4.06 [0.88;<br>18.81]                                          | 3.78 [0.88;<br>16.22]      | 3.25 [0.48;<br>22.22] | 2.92 [0.68;<br>12.53]     | 2.88 [0.31;<br>29.07] | 2.46 [0.52;<br>26.81] | 2.38 [0.54;<br>11.58] | 2.33 [0.56;<br>10.56]  | 2.20 [0.51;<br>9.80]              | 2.13 [0.48;<br>9.50]  | 1.96 [0.39;<br>9.00]   | 1.66 [0.34;<br>8.07]      | 1.54 [0.34;<br>6.99]  | 1.54 [0.39;<br>6.14]    | 1.54 [0.39;<br>5.09]  | Volixibat<br>20mg daily                       | 1.09 [0.23;<br>5.09]  |                       |                       | 1.38 [0.24;<br>7.80]  |                       |                       |                       |                       |                      |
|  | 9.15 [1.78;<br>47.02]         | 6.83 [1.27;<br>36.73]      | 4.21 [1.40;<br>12.61]      | 4.18 [1.36;<br>12.88]                                          | 3.90 [1.41;<br>10.77]      | 3.36 [0.67;<br>16.84] | 3.01 [1.09;<br>8.33]      | 2.97 [0.41;<br>22.91] | 2.53 [0.80;<br>21.34] | 2.46 [0.85;<br>7.10]  | 2.41 [0.90;<br>6.45]   | 2.27 [0.82;<br>6.27]              | 2.20 [0.75;<br>6.41]  | 2.02 [0.59;<br>6.88]   | 1.71 [0.52;<br>5.62]      | 1.58 [0.53;<br>4.76]  | 1.59 [0.64;<br>3.93]    | 1.59 [0.64;<br>5.01]  | Emricasan<br>50mg BID                         | 1.12 [0.25;<br>5.40]  |                       |                       | 1.03 [0.20;<br>4.52]  |                       |                       |                       | 1.77 [0.53;<br>5.86]  |                      |
|  | 9.03 [2.07;<br>39.34]         | 6.74 [1.47;<br>30.89]      | 4.15 [1.81;<br>9.54]       | 4.13 [1.74;<br>9.83]                                           | 3.85 [1.87;<br>7.91]       | 3.31 [0.78;<br>14.05] | 2.97 [1.44;<br>6.12]      | 3.42 [0.59;<br>19.64] | 2.94 [0.47;<br>18.40] | 2.50 [1.02;<br>6.12]  | 2.43 [1.11;<br>5.31]   | 2.37 [1.21;<br>4.67]              | 2.24 [1.09;<br>4.60]  | 2.17 [0.98;<br>4.81]   | 1.99 [0.74;<br>5.39]      | 1.69 [0.66;<br>4.36]  | 1.56 [0.68;<br>3.60]    | 1.57 [0.90;<br>2.74]  | Selonsertib<br>6mg daily                      | 1.11 [0.30;<br>4.11]  |                       |                       | 0.99 [0.34;<br>2.87]  |                       |                       |                       | 1.12 [0.65;<br>1.94]  |                      |
|  | 12.20 [1.69;<br>87.88]        | 9.11 [1.22;<br>68.13]      | 5.61 [1.18;<br>26.62]      | 5.58 [1.15;<br>26.98]                                          | 5.20 [1.16;<br>23.32]      | 4.47 [0.63;<br>31.60] | 4.01 [0.89;<br>18.02]     | 4.62 [0.52;<br>41.20] | 3.97 [0.41;<br>37.96] | 3.38 [0.69;<br>15.16] | 3.28 [0.71;<br>15.16]  | 3.21 [0.73;<br>14.10]             | 3.03 [0.68;<br>13.57] | 2.93 [0.63;<br>13.64]  | 2.69 [0.52;<br>14.03]     | 2.28 [0.45;<br>11.56] | 2.11 [0.44;<br>10.04]   | 2.12 [0.51;<br>8.84]  | Volixibat<br>5mg daily                        | 1.50 [0.31;<br>7.30]  |                       |                       | 1.37 [0.24;<br>7.26]  |                       |                       |                       |                       |                      |
|  | 10.29 [2.35;<br>44.99]        | 7.68 [1.67;<br>35.32]      | 4.73 [2.05;<br>10.94]      | 4.70 [1.96;<br>11.27]                                          | 4.38 [2.11;<br>9.09]       | 3.77 [0.89;<br>16.07] | 3.38 [1.63;<br>7.02]      | 3.89 [0.67;<br>22.44] | 3.34 [0.53;<br>21.03] | 2.85 [1.16;<br>7.02]  | 2.76 [1.25;<br>6.09]   | 2.70 [1.36;<br>5.37]              | 2.55 [1.23;<br>5.29]  | 2.47 [1.10;<br>5.52]   | 2.27 [0.84;<br>6.18]      | 1.92 [0.74;<br>4.99]  | 1.78 [0.77;<br>4.13]    | 1.78 [1.01;<br>3.15]  | Selonsertib<br>18mg daily                     | 1.26 [0.34;<br>4.71]  |                       |                       | 1.16 [0.26;<br>3.28]  |                       |                       |                       |                       |                      |
|  | 19.20 [1.40;<br>262.56]       | 14.32 [1.02;<br>201.66]    | 8.82 [0.87;<br>89.53]      | 8.78 [0.85;<br>90.19]                                          | 8.18 [0.84;<br>86.59]      | 7.04 [0.88;<br>61.74] | 6.31 [0.65;<br>51.41]     | 7.26 [0.45;<br>51.41] | 6.24 [0.37;<br>17.18] | 5.32 [0.51;<br>17.18] | 5.15 [0.52;<br>15.41]  | 5.04 [0.52;<br>14.65]             | 4.76 [0.49;<br>46.53] | 4.60 [0.46;<br>45.82]  | 4.24 [0.39;<br>33.74]     | 3.59 [0.34;<br>29.92] | 3.32 [0.33;<br>23.38]   | 3.33 [0.36;<br>21.24] | Sintuzumab<br>200mg IV<br>every other<br>week | 3.36 [0.33;<br>29.57] | 2.36 [0.19;<br>22.31] | 2.16 [0.16;<br>22.31] | 2.10 [0.19;<br>21.24] | 2.12 [0.21;<br>22.31] | 1.57 [0.11;<br>22.31] | 1.87 [0.19;<br>18.70] | 0.84 [0.07;<br>10.21] | Emricasan<br>5mg BID |
|  | 16.17 [2.79;<br>93.78]        | 12.06 [1.99;<br>73.03]     | 7.43 [2.08;<br>26.51]      | 7.39 [2.02;<br>26.98]                                          | 6.89 [2.07;<br>22.92]      | 5.93 [1.04;<br>33.64] | 5.32 [1.60;<br>17.71]     | 6.11 [0.83;<br>45.00] | 5.25 [0.66;<br>41.73] | 4.48 [1.20;<br>16.66] | 4.34 [1.26;<br>15.01]  | 4.25 [1.31;<br>13.78]             | 4.01 [1.21;<br>13.34] | 3.88 [1.11;<br>13.53]  | 3.57 [0.89;<br>14.24]     | 3.02 [0.78;<br>11.67] | 2.80 [0.78;<br>10.00]   | 2.80 [0.92;<br>8.52]  | Emricasan<br>5mg BID                          | 3.02 [0.78;<br>10.00] | 1.82 [0.31;<br>10.75] | 1.77 [0.53;<br>5.86]  | 1.79 [0.52;<br>6.21]  | 1.32 [0.22;<br>8.11]  | 1.57 [0.45;<br>5.48]  |                       |                       |                      |

Summary of treatment effects of network meta-analysis presented in league table for patients achieving NASH resolution without worsening fibrosis. Network estimates are derived using a random effects model and reported as relative risk [RR] with 95% confidence interval [CI]. The league table should be read between comparisons as column versus row and read left to right. Treatments are ranked from best to worst along the leading diagonal, based upon P-scores and relative treatment ranking, with treatment in top left position representing the superior rank. Estimates above the leading diagonal are based upon meta-analysis from direct pairwise comparisons, whereas estimates below the leading diagonal represent the total network estimate after indirect evidence has been included. Estimates highlighted in green represent statistically significant findings.



e-Table 3: Fibrosis improvement without worsening NASH

|                               |                                   |                           |                                                                |                                   |                        |                        |                              |                         |                      |                             |                          |                           |                       |                      |                      |  |  |  |  |  |                      |                      |
|-------------------------------|-----------------------------------|---------------------------|----------------------------------------------------------------|-----------------------------------|------------------------|------------------------|------------------------------|-------------------------|----------------------|-----------------------------|--------------------------|---------------------------|-----------------------|----------------------|----------------------|--|--|--|--|--|----------------------|----------------------|
| Aldafermin<br>1mg SQ<br>daily |                                   |                           |                                                                |                                   |                        |                        |                              |                         |                      |                             |                          |                           |                       |                      |                      |  |  |  |  |  | 2.40 [0.92;<br>6.29] |                      |
| 1.24 [0.44;<br>3.47]          | Obeticholic<br>acid 25mg<br>daily |                           |                                                                |                                   |                        |                        |                              |                         |                      |                             |                          |                           |                       |                      |                      |  |  |  |  |  | 1.94 [1.34;<br>2.79] |                      |
| 1.42 [0.46;<br>4.42]          | 1.15 [0.57;<br>2.32]              | Vitamin E<br>800 IU daily | 1.03 [0.66;<br>1.60]                                           |                                   |                        |                        |                              |                         |                      |                             |                          |                           |                       |                      |                      |  |  |  |  |  | 1.69 [0.93;<br>3.08] |                      |
| 1.46 [0.47;<br>4.55]          | 1.18 [0.58;<br>2.39]              | 1.03 [0.66;<br>1.60]      | Vitamin E<br>800 IU daily<br>and<br>Pioglitazone<br>45mg daily |                                   |                        |                        |                              |                         |                      |                             |                          |                           |                       |                      |                      |  |  |  |  |  | 1.64 [0.90;<br>3.00] |                      |
| 1.62 [0.58;<br>4.58]          | 1.31 [0.95;<br>1.79]              | 1.14 [0.56;<br>2.33]      | 1.11 [0.54;<br>2.27]                                           | Obeticholic<br>acid 10mg<br>daily |                        |                        |                              |                         |                      |                             |                          |                           |                       |                      |                      |  |  |  |  |  | 1.48 [1.01;<br>2.18] |                      |
| 1.79 [0.59;<br>5.41]          | 1.44 [0.75;<br>2.78]              | 1.26 [0.56;<br>2.83]      | 1.22 [0.54;<br>2.76]                                           | 1.10 [0.56;<br>2.15]              | MSDC0602K<br>250mg TID | 1.04 [0.64;<br>1.67]   |                              |                         |                      |                             |                          |                           |                       |                      |                      |  |  |  |  |  | 1.22 [0.74;<br>2.03] |                      |
| 1.85 [0.61;<br>5.63]          | 1.49 [0.77;<br>2.91]              | 1.30 [0.57;<br>2.95]      | 1.27 [0.56;<br>2.88]                                           | 1.14 [0.58;<br>2.25]              | 1.04 [0.64;<br>1.67]   | MSDC0602K<br>125mg TID |                              |                         |                      |                             |                          |                           |                       |                      |                      |  |  |  |  |  | 1.18 [0.70;<br>1.98] |                      |
| 1.97 [0.60;<br>6.49]          | 1.58 [0.72;<br>3.51]              | 1.38 [0.55;<br>3.49]      | 1.34 [0.53;<br>3.40]                                           | 1.21 [0.54;<br>2.71]              | 1.10 [0.45;<br>2.68]   | 1.06 [0.43;<br>2.61]   | Resmetiro<br>m 80mg<br>daily |                         |                      |                             |                          |                           |                       |                      |                      |  |  |  |  |  |                      | 1.22 [0.60;<br>2.48] |
| 2.18 [0.71;<br>6.71]          | 1.76 [0.89;<br>3.49]              | 1.53 [0.67;<br>3.53]      | 1.49 [0.65;<br>3.44]                                           | 1.35 [0.67;<br>2.70]              | 1.22 [0.74;<br>2.03]   | 1.18 [0.70;<br>1.98]   | 1.11 [0.45;<br>2.77]         | MSDC0602K<br>62.5mg TID | 1.10 [0.62;<br>1.97] |                             |                          |                           |                       |                      |                      |  |  |  |  |  |                      | 1.10 [0.62;<br>1.97] |
| 2.40 [0.92;<br>6.29]          | 1.94 [1.34;<br>2.79]              | 1.69 [0.93;<br>3.08]      | 1.64 [0.90;<br>3.00]                                           | 1.48 [1.01;<br>2.18]              | 1.34 [0.78;<br>2.32]   | 1.30 [0.74;<br>2.26]   | 1.22 [0.60;<br>2.48]         | 1.10 [0.62;<br>1.97]    | 1.10 [0.62;<br>1.97] | Placebo                     | 1.09 [0.49;<br>2.43]     | 1.04 [0.74;<br>1.47]      | 1.08 [0.76;<br>1.53]  | 1.55 [0.82;<br>2.96] | 1.70 [0.87;<br>3.30] |  |  |  |  |  |                      |                      |
| 2.63 [0.75;<br>9.19]          | 2.12 [0.88;<br>5.10]              | 1.85 [0.68;<br>5.02]      | 1.80 [0.66;<br>4.89]                                           | 1.62 [0.67;<br>3.94]              | 1.47 [0.56;<br>3.87]   | 1.42 [0.54;<br>3.76]   | 1.34 [0.46;<br>3.88]         | 1.21 [0.45;<br>3.23]    | 1.09 [0.49;<br>2.43] | Cenicriviroc<br>150mg daily |                          |                           |                       |                      |                      |  |  |  |  |  |                      |                      |
| 2.51 [0.90;<br>6.97]          | 2.02 [1.22;<br>3.34]              | 1.76 [0.88;<br>3.52]      | 1.71 [0.86;<br>3.43]                                           | 1.55 [0.92;<br>2.60]              | 1.40 [0.74;<br>2.68]   | 1.35 [0.70;<br>2.60]   | 1.28 [0.58;<br>2.80]         | 1.15 [0.59;<br>2.25]    | 1.04 [0.74;<br>1.47] | 0.95 [0.40;<br>2.27]        | Selonsertib<br>6mg daily | 1.03 [0.77;<br>1.37]      |                       |                      |                      |  |  |  |  |  |                      |                      |
| 2.56 [0.92;<br>7.13]          | 2.07 [1.25;<br>3.42]              | 1.80 [0.90;<br>3.60]      | 1.75 [0.87;<br>3.51]                                           | 1.58 [0.94;<br>2.66]              | 1.43 [0.75;<br>2.74]   | 1.38 [0.72;<br>2.67]   | 1.30 [0.59;<br>2.86]         | 1.17 [0.60;<br>2.31]    | 1.07 [0.75;<br>1.51] | 0.97 [0.41;<br>2.33]        | 1.02 [0.77;<br>1.36]     | Selonsertib<br>18mg daily |                       |                      |                      |  |  |  |  |  |                      |                      |
| 3.73 [1.17;<br>11.89]         | 3.01 [1.43;<br>6.32]              | 2.62 [1.09;<br>6.33]      | 2.55 [1.06;<br>6.17]                                           | 2.30 [1.08;<br>4.88]              | 2.09 [0.90;<br>4.86]   | 2.01 [0.86;<br>4.72]   | 1.90 [0.73;<br>4.94]         | 1.71 [0.72;<br>4.07]    | 1.55 [0.82;<br>2.96] | 1.42 [0.51;<br>3.96]        | 1.49 [0.72;<br>3.09]     | 1.46 [0.70;<br>3.03]      | Emricasan<br>50mg BID | 1.09 [0.52;<br>2.29] |                      |  |  |  |  |  |                      |                      |
| 4.08 [1.27;<br>13.14]         | 3.29 [1.54;<br>7.02]              | 2.87 [1.17;<br>7.02]      | 2.79 [1.14;<br>6.84]                                           | 2.52 [1.17;<br>5.43]              | 2.28 [0.97;<br>5.39]   | 2.20 [0.93;<br>5.24]   | 2.08 [0.79;<br>5.47]         | 1.87 [0.78;<br>4.51]    | 1.70 [0.87;<br>3.30] | 1.55 [0.55;<br>4.38]        | 1.63 [0.77;<br>3.44]     | 1.59 [0.75;<br>3.37]      | 1.09 [0.52;<br>2.29]  | Emricasan<br>5mg BID |                      |  |  |  |  |  |                      |                      |

Summary of treatment effects of network meta-analysis presented in league table for patients achieving fibrosis improvement without worsening NASH. Network estimates are derived using a random effects model and reported as relative risk [RR] with 95% confidence interval [CI]. The league table should be read between comparisons as column versus row and read left to right. Treatments are ranked from best to worst along the leading diagonal, based upon P-scores and relative treatment ranking, with treatment in top left position representing the superior rank. Estimates above the leading diagonal are based upon meta-analysis from direct pairwise comparisons, whereas estimates below the leading diagonal represent the total network estimate after indirect evidence has been included. Estimates highlighted in green represent statistically significant findings.











e-Table 9: Mean change in fibrosis

|                           |                             |                            |                            |                        |                           |                        |                                |                        |                            |                        |                         |                        |                        |                            |                                                    |                        |                        |                            |                                                    |                        |   |                        |                          |   |
|---------------------------|-----------------------------|----------------------------|----------------------------|------------------------|---------------------------|------------------------|--------------------------------|------------------------|----------------------------|------------------------|-------------------------|------------------------|------------------------|----------------------------|----------------------------------------------------|------------------------|------------------------|----------------------------|----------------------------------------------------|------------------------|---|------------------------|--------------------------|---|
| Telmisartan<br>40mg daily | .                           | .                          | .                          | .                      | 0.00 [-0.58;<br>0.58]     | .                      | .                              | .                      | .                          | .                      | .                       | .                      | .                      | .                          | .                                                  | .                      | .                      | .                          | .                                                  | .                      | . | .                      | -0.95 [-1.49; -<br>0.41] |   |
| -0.11 [-0.59;<br>0.37]    | Pentoxifylline<br>400mg TID | .                          | 0.54 [-0.41;<br>1.49]      | .                      | .                         | .                      | .                              | .                      | .                          | .                      | .                       | .                      | .                      | .                          | .                                                  | .                      | .                      | .                          | .                                                  | .                      | . | .                      | -0.60 [-0.85; -<br>0.35] |   |
| -0.17 [-0.80;<br>0.46]    | -0.06 [-0.59;<br>0.47]      | Pioglitazone<br>45mg daily | .                          | .                      | .                         | .                      | .                              | .                      | .                          | .                      | .                       | .                      | .                      | .                          | .                                                  | .                      | .                      | .                          | .                                                  | .                      | . | .                      | -0.50 [-0.97; -<br>0.03] |   |
| -0.21 [-0.72;<br>0.30]    | -0.10 [-0.50;<br>0.31]      | -0.10 [-0.63;<br>0.55]     | Pioglitazone<br>30mg daily | .                      | -0.10 [-0.48;<br>0.28]    | .                      | .                              | .                      | .                          | .                      | .                       | .                      | .                      | .                          | .                                                  | .                      | .                      | .                          | .                                                  | .                      | . | .                      | -0.30 [-0.69;<br>0.09]   |   |
| -0.27 [-0.97;<br>0.43]    | -0.16 [-0.77;<br>0.46]      | -0.10 [-0.84;<br>0.64]     | Liraglutide<br>1.8mg daily | .                      | -0.06 [-0.72;<br>0.60]    | .                      | .                              | .                      | .                          | .                      | .                       | .                      | .                      | .                          | .                                                  | .                      | .                      | .                          | .                                                  | .                      | . | .                      | -0.40 [-0.97;<br>0.17]   |   |
| -0.32 [-0.74;<br>0.10]    | -0.21 [-0.57;<br>0.15]      | -0.15 [-0.70;<br>0.40]     | -0.11 [-0.46;<br>0.24]     | -0.05 [-0.68;<br>0.58] | Vitamin E 800<br>IU daily | 0.00 [-0.48;<br>0.48]  | .                              | .                      | .                          | .                      | .                       | .                      | .                      | .                          | .                                                  | .                      | .                      | .                          | .                                                  | .                      | . | .                      | -0.23 [-0.53;<br>0.07]   |   |
| .                         | .                           | .                          | .                          | .                      | .                         | .                      | .                              | .                      | .                          | .                      | .                       | .                      | .                      | .                          | .                                                  | .                      | .                      | .                          | .                                                  | .                      | . | .                      | .                        |   |
| -0.34 [-0.92;<br>0.24]    | -0.23 [-0.73;<br>0.28]      | -0.17 [-0.82;<br>0.48]     | -0.13 [-0.66;<br>0.40]     | -0.07 [-0.79;<br>0.65] | -0.02 [-0.46;<br>0.41]    | .                      | .                              | .                      | .                          | .                      | .                       | .                      | .                      | .                          | .                                                  | .                      | .                      | .                          | .                                                  | .                      | . | .                      | -0.30 [-0.82;<br>0.22]   |   |
| -0.37 [-0.90;<br>0.16]    | -0.26 [-0.66;<br>0.15]      | -0.20 [-0.78;<br>0.38]     | -0.16 [-0.64;<br>0.32]     | -0.10 [-0.76;<br>0.56] | -0.05 [-0.48;<br>0.38]    | -0.03 [-0.58;<br>0.53] | Obeticholic acid<br>25mg daily | .                      | .                          | .                      | .                       | .                      | .                      | .                          | .                                                  | .                      | .                      | .                          | .                                                  | .                      | . | .                      | -0.30 [-0.63;<br>0.03]   |   |
| -0.42 [-1.19;<br>0.36]    | -0.31 [-1.00;<br>0.39]      | -0.25 [-1.06;<br>0.56]     | -0.21 [-0.95;<br>0.53]     | -0.15 [-1.01;<br>0.71] | -0.10 [-0.81;<br>0.61]    | -0.08 [-0.87;<br>0.71] | Metformin<br>500mg daily       | .                      | .                          | .                      | .                       | .                      | .                      | .                          | .                                                  | .                      | .                      | .                          | .                                                  | .                      | . | .                      | -0.25 [-0.90;<br>0.40]   |   |
| -0.47 [-1.03;<br>0.09]    | -0.36 [-0.80;<br>0.09]      | -0.30 [-0.90;<br>0.30]     | -0.26 [-0.77;<br>0.25]     | -0.20 [-0.88;<br>0.48] | -0.15 [-0.62;<br>0.32]    | -0.13 [-0.71;<br>0.46] | -0.10 [-0.60;<br>0.40]         | -0.05 [-0.80;<br>0.70] | Colesevelam<br>3.75g daily | .                      | .                       | .                      | .                      | .                          | .                                                  | .                      | .                      | .                          | .                                                  | .                      | . | .                      | -0.20 [-0.58;<br>0.18]   |   |
| -0.67 [-1.31;<br>0.02]    | -0.56 [-1.11; -<br>0.01]    | -0.50 [-1.19;<br>0.19]     | -0.46 [-1.06;<br>0.14]     | -0.40 [-1.15;<br>0.35] | -0.35 [-0.92;<br>0.22]    | -0.33 [-0.99;<br>0.34] | -0.30 [-0.89;<br>0.29]         | -0.25 [-1.07;<br>0.57] | -0.20 [-0.82;<br>0.42]     | (EPA 50.4mg)<br>TID    | 0.00 [-0.49;<br>0.49]   | .                      | .                      | .                          | .                                                  | .                      | .                      | .                          | .                                                  | .                      | . | .                      | 0.00 [-0.49;<br>0.49]    |   |
| -0.67 [-1.08; -<br>0.25]  | -0.56 [-0.80; -<br>0.32]    | -0.50 [-0.97; -<br>0.03]   | -0.46 [-0.81; -<br>0.11]   | -0.40 [-0.97;<br>0.17] | -0.35 [-0.63; -<br>0.07]  | -0.33 [-0.78;<br>0.12] | -0.30 [-0.63;<br>0.03]         | -0.25 [-0.90;<br>0.40] | -0.20 [-0.58;<br>0.18]     | 0.00 [-0.49;<br>0.49]  | Placebo                 | -0.02 [-0.36;<br>0.32] | -0.08 [-0.34;<br>0.18] | -0.21 [-0.77;<br>0.35]     | .                                                  | .                      | .                      | .                          | .                                                  | .                      | . | .                      | -0.26 [-0.88;<br>0.37]   |   |
| -0.69 [-1.23; -<br>0.15]  | -0.58 [-0.99; -<br>0.16]    | -0.52 [-1.10;<br>0.06]     | -0.48 [-0.96;<br>0.01]     | -0.42 [-1.08;<br>0.24] | -0.37 [-0.81;<br>0.07]    | -0.35 [-0.91;<br>0.21] | -0.32 [-0.79;<br>0.15]         | -0.27 [-1.01;<br>0.47] | -0.22 [-0.73;<br>0.29]     | -0.02 [-0.62;<br>0.58] | Metadoxine<br>500mg BID | -0.02 [-0.36;<br>0.32] | -0.08 [-0.49;<br>0.37] | -0.08 [-0.34;<br>0.18]     | UDCA 23mg/kg<br>day                                | .                      | .                      | .                          | .                                                  | .                      | . | .                      | .                        | . |
| -0.75 [-1.24; -<br>0.26]  | -0.64 [-0.99; -<br>0.28]    | -0.58 [-1.12; -<br>0.04]   | -0.54 [-0.97; -<br>0.11]   | -0.48 [-1.10;<br>0.14] | -0.43 [-0.81; -<br>0.05]  | -0.41 [-0.92;<br>0.11] | -0.38 [-0.80;<br>0.04]         | -0.33 [-1.03;<br>0.37] | -0.28 [-0.74;<br>0.18]     | -0.08 [-0.64;<br>0.48] | -0.08 [-0.34;<br>0.18]  | -0.06 [-0.49;<br>0.37] | -0.06 [-0.49;<br>0.37] | -0.08 [-0.34;<br>0.18]     | Rosiglitazone<br>8mg daily                         | -0.11 [-0.80;<br>0.58] | -0.19 [-0.84;<br>0.46] | -0.13 [-0.74;<br>0.48]     | Rosiglitazone<br>8mg daily                         | -0.11 [-0.80;<br>0.58] | . | .                      | -0.38 [-1.05;<br>0.29]   |   |
| -0.88 [-1.57; -<br>0.18]  | -0.77 [-1.37; -<br>0.16]    | -0.71 [-1.44;<br>0.02]     | -0.67 [-1.32; -<br>0.02]   | -0.61 [-1.40;<br>0.18] | -0.56 [-1.18;<br>0.06]    | -0.54 [-1.25;<br>0.18] | -0.51 [-1.16;<br>0.14]         | -0.46 [-1.32;<br>0.40] | -0.41 [-1.08;<br>0.26]     | -0.21 [-0.95;<br>0.53] | -0.21 [-0.77;<br>0.35]  | -0.19 [-0.84;<br>0.46] | -0.13 [-0.74;<br>0.48] | Rosiglitazone<br>8mg daily | -0.11 [-0.80;<br>0.58]                             | -0.19 [-0.84;<br>0.46] | -0.13 [-0.74;<br>0.48] | Rosiglitazone<br>8mg daily | -0.11 [-0.80;<br>0.58]                             | .                      | . | -0.38 [-1.05;<br>0.29] |                          |   |
| -0.99 [-1.97; -<br>0.01]  | -0.88 [-1.79;<br>0.04]      | -0.82 [-1.82;<br>0.18]     | -0.78 [-1.73;<br>0.17]     | -0.72 [-1.77;<br>0.33] | -0.67 [-1.60;<br>0.26]    | -0.65 [-1.64;<br>0.34] | -0.62 [-1.57;<br>0.33]         | -0.57 [-1.67;<br>0.53] | -0.52 [-1.48;<br>0.44]     | -0.32 [-1.33;<br>0.69] | -0.32 [-1.21;<br>0.57]  | -0.30 [-1.25;<br>0.65] | -0.24 [-1.16;<br>0.68] | -0.11 [-0.80;<br>0.58]     | Rosiglitazone<br>8mg and<br>Metformin<br>500mg BID | -0.11 [-0.80;<br>0.58] | -0.19 [-0.84;<br>0.46] | -0.13 [-0.74;<br>0.48]     | Rosiglitazone<br>8mg and<br>Metformin<br>500mg BID | -0.11 [-0.80;<br>0.58] | . | .                      | -0.27 [-0.81;<br>0.27]   |   |
| -0.92 [-1.68; -<br>0.17]  | -0.81 [-1.49; -<br>0.14]    | -0.76 [-1.54;<br>0.03]     | -0.72 [-1.43;<br>0.00]     | -0.66 [-1.50;<br>0.19] | -0.60 [-1.29;<br>0.08]    | -0.58 [-1.36;<br>0.19] | -0.56 [-1.27;<br>0.16]         | -0.51 [-1.41;<br>0.40] | -0.46 [-1.19;<br>0.28]     | -0.26 [-1.06;<br>0.54] | -0.26 [-0.88;<br>0.37]  | -0.24 [-0.95;<br>0.48] | -0.18 [-0.86;<br>0.50] | -0.05 [-0.89;<br>0.79]     | Sitagliptin<br>100mg daily                         | -0.06 [-1.02;<br>1.15] | -0.18 [-0.89;<br>0.79] | -0.05 [-0.89;<br>0.79]     | Sitagliptin<br>100mg daily                         | -0.06 [-1.02;<br>1.15] | . | .                      | .                        |   |
| -1.26 [-2.22; -<br>0.29]  | -1.15 [-2.05; -<br>0.24]    | -1.09 [-2.08; -<br>0.10]   | -1.05 [-1.99; -<br>0.11]   | -0.99 [-2.03;<br>0.05] | -0.94 [-1.85; -<br>0.03]  | -0.92 [-1.90;<br>0.06] | -0.89 [-1.82;<br>0.04]         | -0.84 [-1.93;<br>0.25] | -0.79 [-1.74;<br>0.16]     | -0.59 [-1.59;<br>0.41] | -0.59 [-1.46;<br>0.28]  | -0.57 [-1.50;<br>0.36] | -0.51 [-1.42;<br>0.40] | -0.38 [-1.05;<br>0.29]     | Rosiglitazone<br>8mg and<br>Losartan<br>50mg daily | -0.27 [-0.81;<br>0.27] | -0.38 [-1.05;<br>0.29] | -0.38 [-1.05;<br>0.29]     | Rosiglitazone<br>8mg and<br>Losartan<br>50mg daily | -0.27 [-0.81;<br>0.27] | . | .                      | -0.33 [-1.41;<br>0.74]   |   |

Summary of treatment effects of network meta-analysis presented in league table for the mean change in fibrosis score compared from baseline to end of treatment. Network estimates are derived using a random effects model and reported as mean difference [MD] with 95% confidence interval [CI]. The league table should be read between comparisons as column versus row and read left to right. Treatments are ranked from best to worst along the leading diagonal, based upon P-scores and relative treatment ranking, with treatment in top left position representing the superior rank. Estimates above the leading diagonal are based upon meta-analysis from direct pairwise comparisons, whereas estimates below the leading diagonal represent the total network estimate after indirect evidence has been included. Estimates highlighted in green represent statistically significant findings.



## Appendix 5: Forest plots of individual outcomes of network meta-analysis in order of relative treatment rank

e-Figure 10:  $\geq 2$ -point decrease in NAFLD Activity Score [NAS]

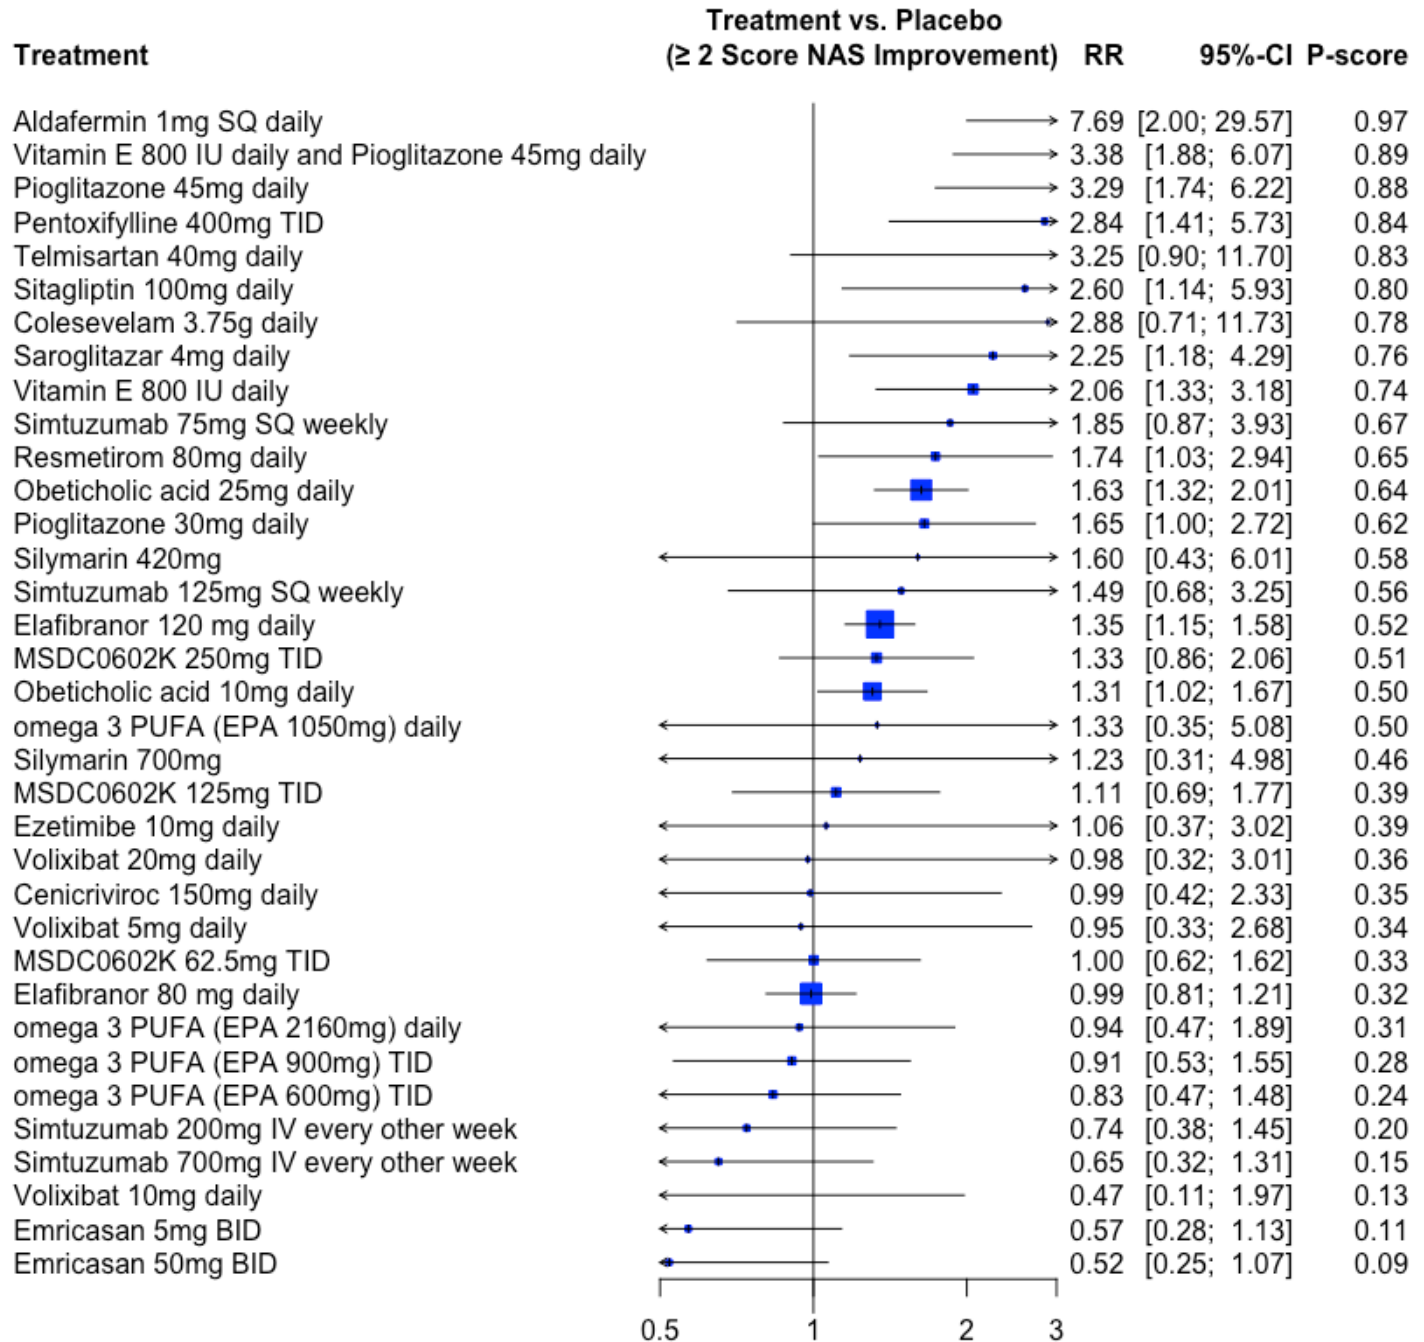

Forest plot for patients achieving  $\geq 2$ -point decrease in NAFLD Activity Score [NAS]. All treatments are reported in comparison to placebo and sorted in order of relative treatment rank. Relative treatment rank is derived from the P-score, which ranges from 1 (best) to 0 (worst). In other words, a P-score closer to 1 indicates a greater probability of achieving the highest ranking, whereas a P-score approaching 0 would indicate a greater probability of achieving the worst ranking.



e-Figure 11: NASH resolution without worsening fibrosis

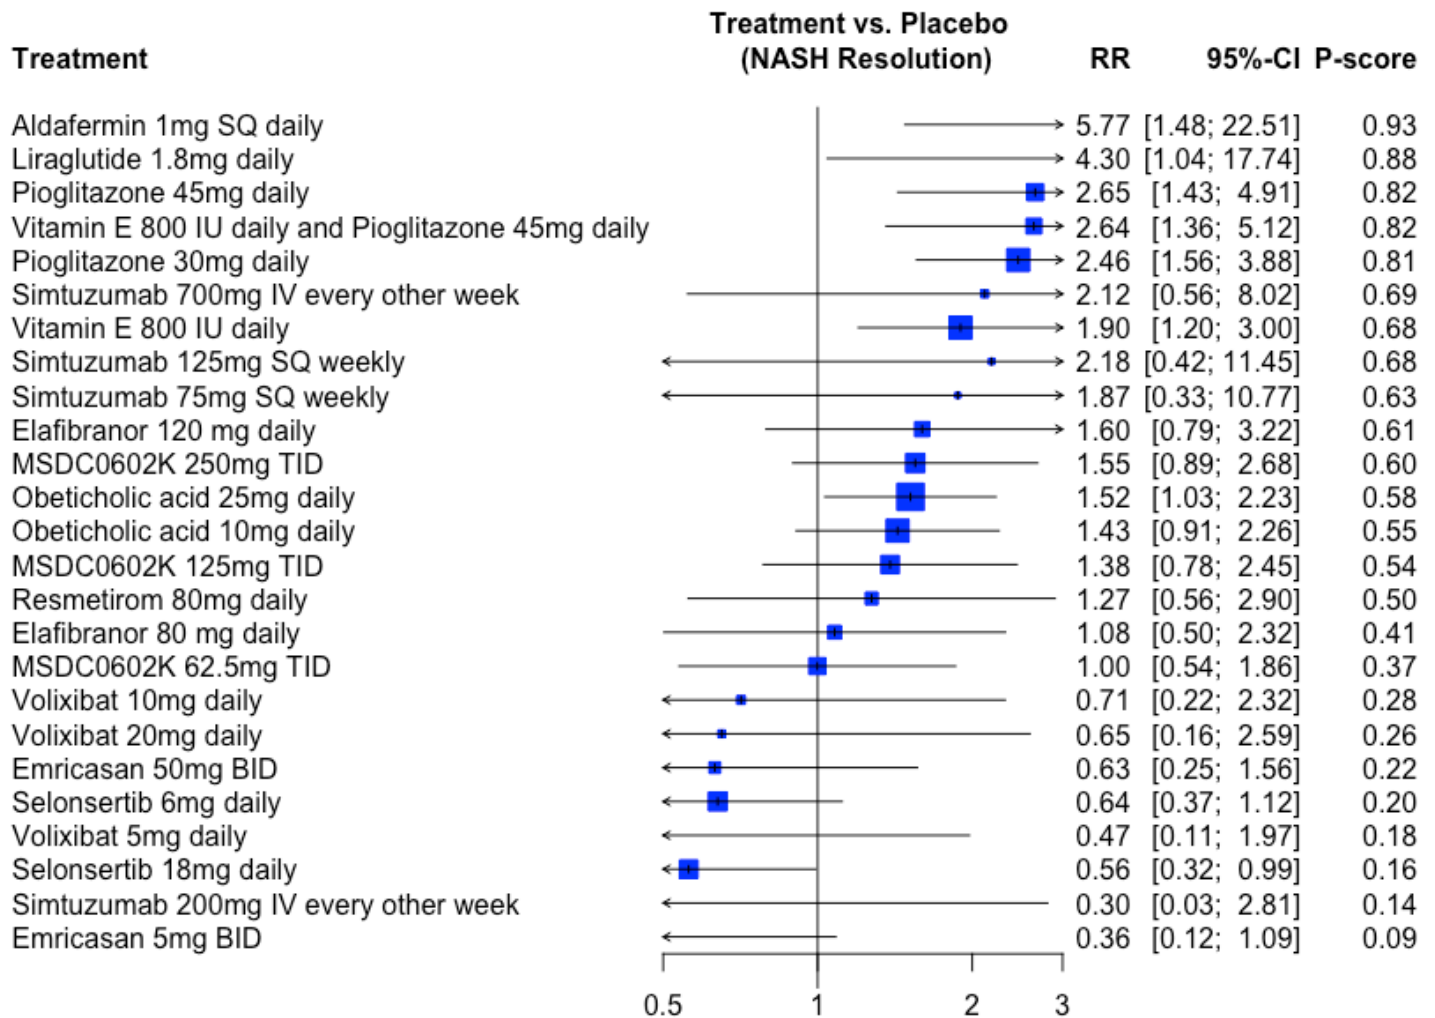

Forest plot for patients achieving NASH resolution without worsening fibrosis. All treatments are reported in comparison to placebo and sorted in order of relative treatment rank. Relative treatment rank is derived from the P-score, which ranges from 1 (best) to 0 (worst). In other words, a P-score closer to 1 indicates a greater probability of achieving the highest ranking, whereas a P-score approaching 0 would indicate a greater probability of achieving the worst ranking.

e-Figure 12: Fibrosis improvement without worsening NASH

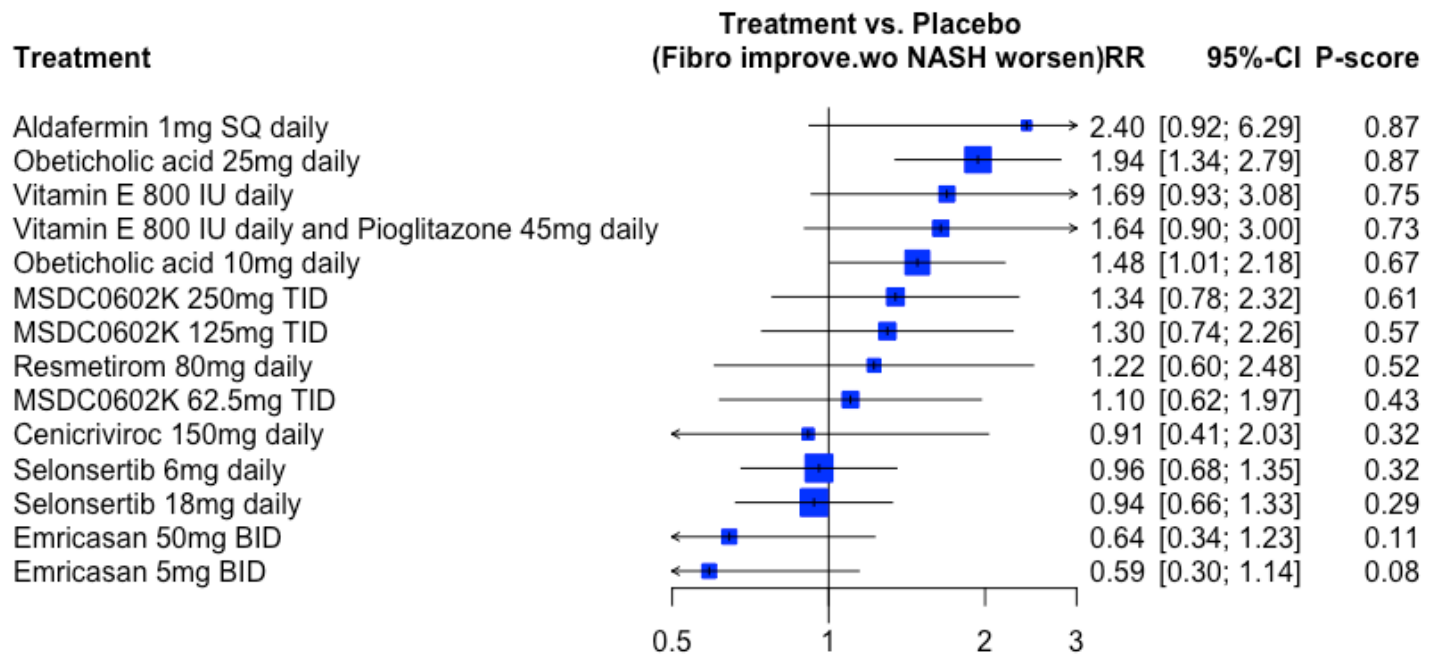

Forest plot for patients achieving fibrosis improvement without worsening NASH. All treatments are reported in comparison to placebo and sorted in order of relative treatment rank. Relative treatment rank is derived from the P-score, which ranges from 1 (best) to 0 (worst). In other words, a P-score closer to 1 indicates a greater probability of achieving the highest ranking, whereas a P-score approaching 0 would indicate a greater probability of achieving the worst ranking.

e-Figure 13: Fibrosis improvement regardless of NASH progression

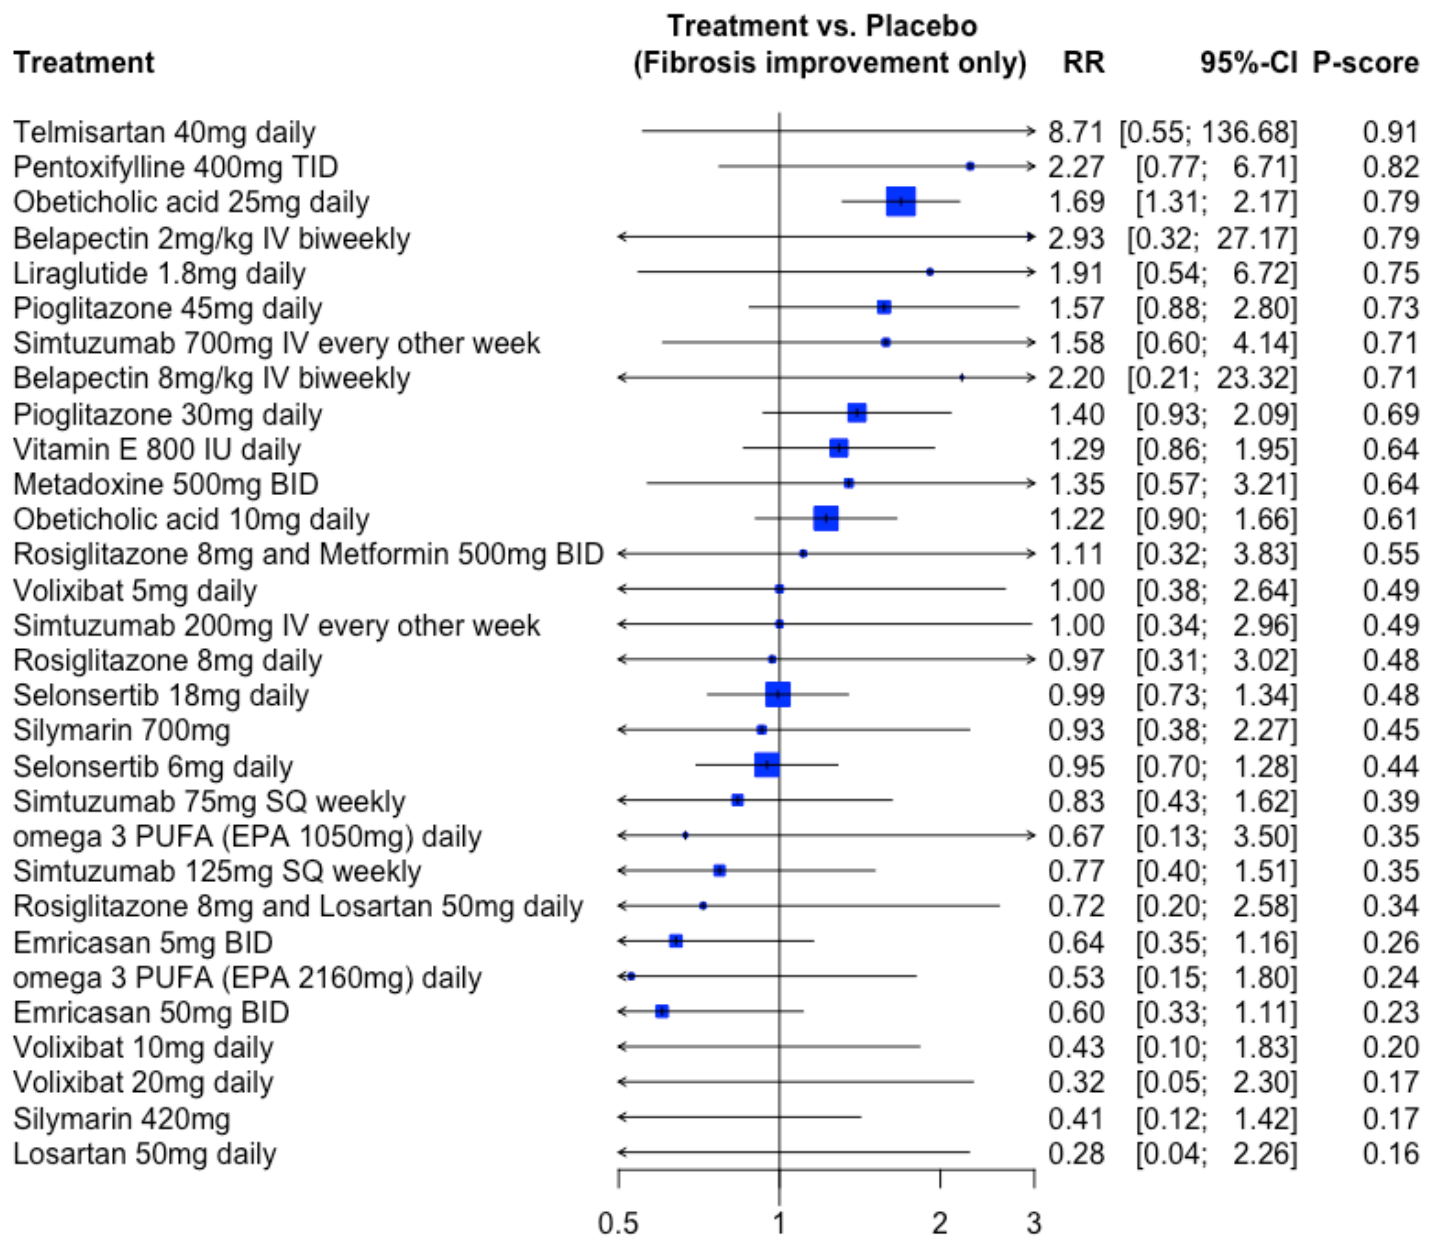

Forest plot for patients achieving fibrosis improvement regardless of NASH progression. All treatments are reported in comparison to placebo and sorted in order of relative treatment rank. Relative treatment rank is derived from the P-score, which ranges from 1 (best) to 0 (worst). In other words, a P-score closer to 1 indicates a greater probability of achieving the highest ranking, whereas a P-score approaching 0 would indicate a greater probability of achieving the worst ranking.

e-Figure 14: Mean change in NAFLD Activity Score [NAS]

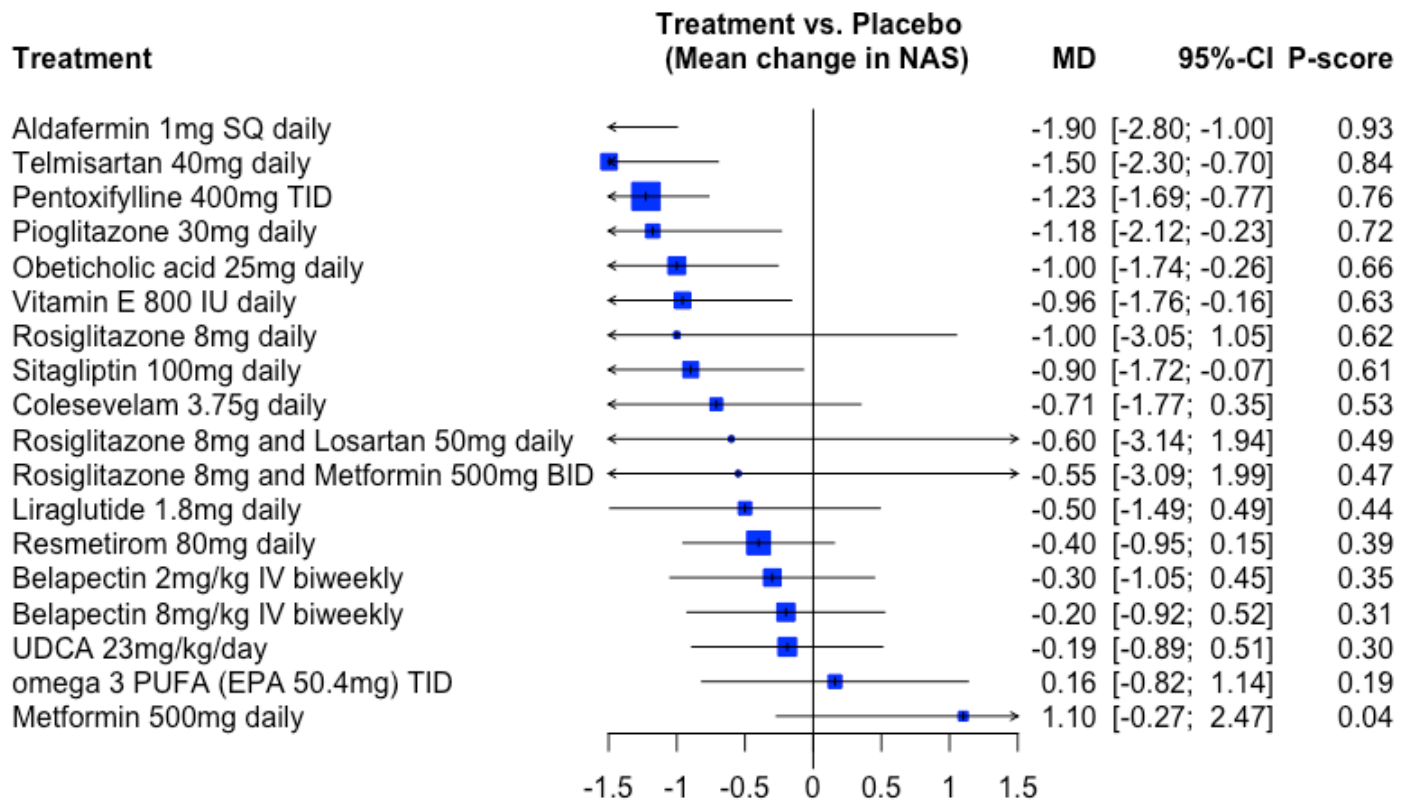

Forest plot for the mean change in NAFLD activity score [NAS] compared from baseline to end of treatment. All treatments are reported in comparison to placebo and sorted in order of relative treatment rank. Relative treatment rank is derived from the P-score, which ranges from 1 (best) to 0 (worst). In other words, a P-score closer to 1 indicates a greater probability of achieving the highest ranking, whereas a P-score approaching 0 would indicate a greater probability of achieving the worst ranking.

e-Figure 15: Mean change in steatosis

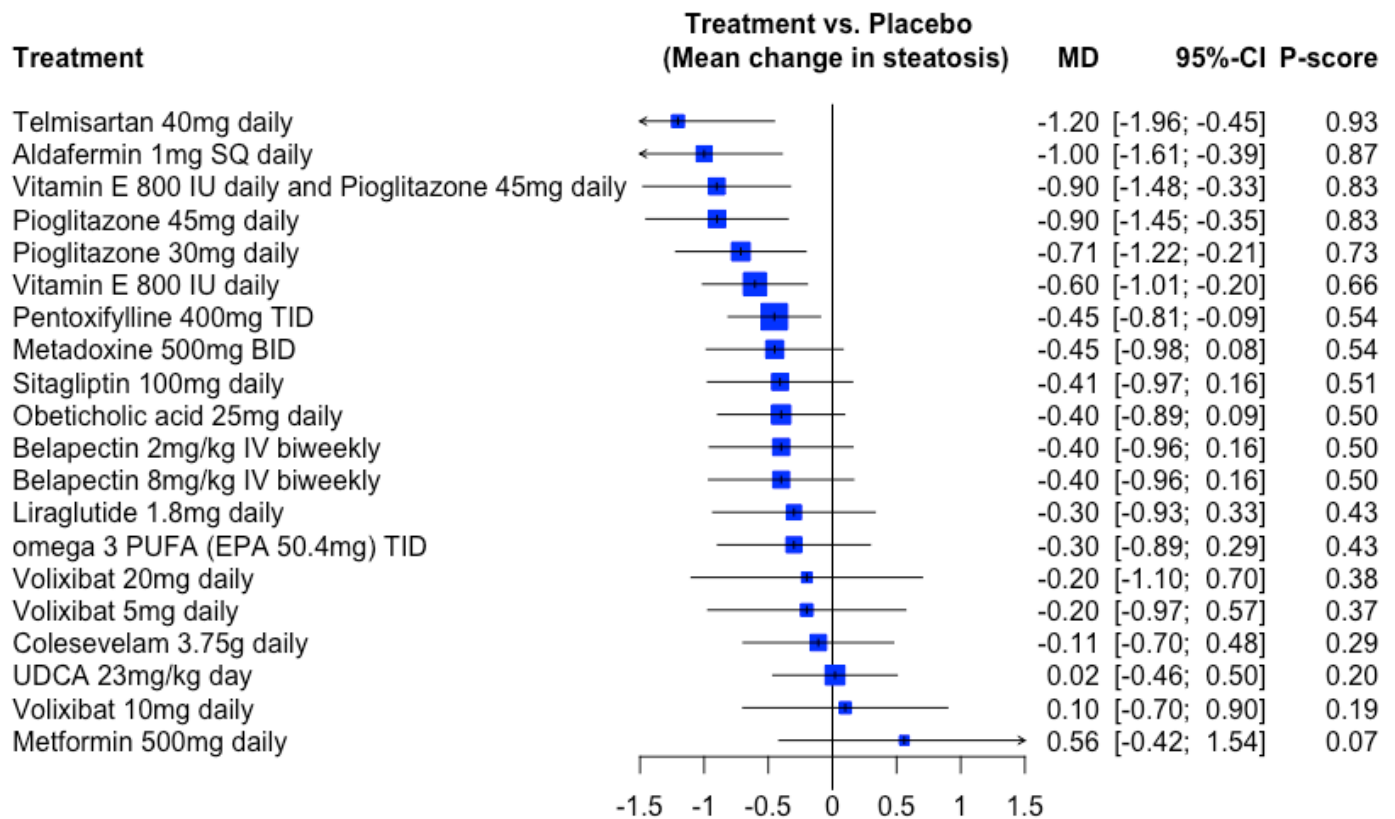

Forest plot for the mean change in steatosis score compared from baseline to end of treatment. All treatments are reported in comparison to placebo and sorted in order of relative treatment rank. Relative treatment rank is derived from the P-score, which ranges from 1 (best) to 0 (worst). In other words, a P-score closer to 1 indicates a greater probability of achieving the highest ranking, whereas a P-score approaching 0 would indicate a greater probability of achieving the worst ranking.

e-Figure 16: Mean change in lobular inflammation

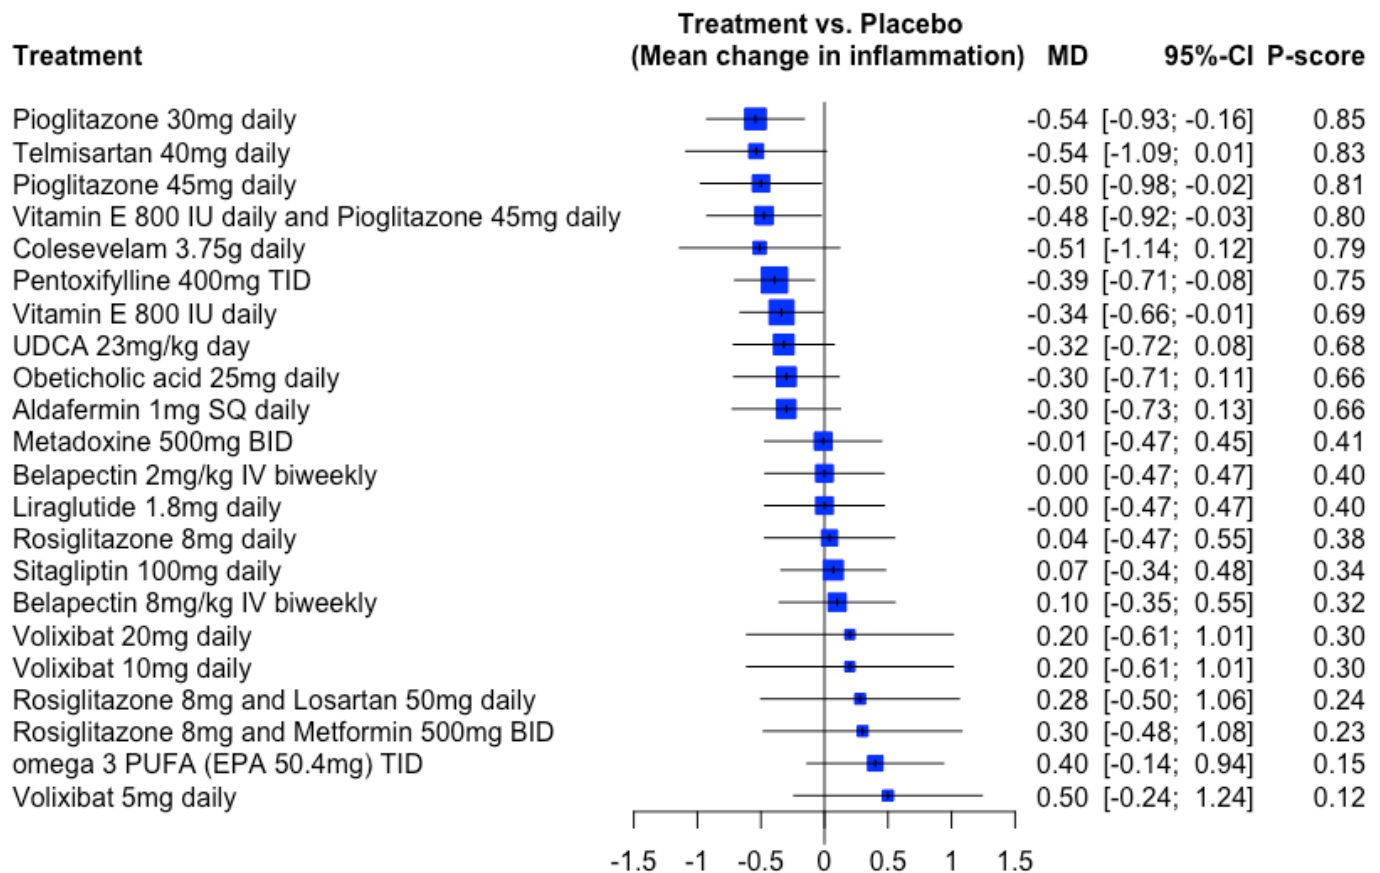

Forest plot for the mean change in lobular inflammation score compared from baseline to end of treatment. All treatments are reported in comparison to placebo and sorted in order of relative treatment rank. Relative treatment rank is derived from the P-score, which ranges from 1 (best) to 0 (worst). In other words, a P-score closer to 1 indicates a greater probability of achieving the highest ranking, whereas a P-score approaching 0 would indicate a greater probability of achieving the worst ranking.



e-Figure 17: Mean change in hepatocellular ballooning

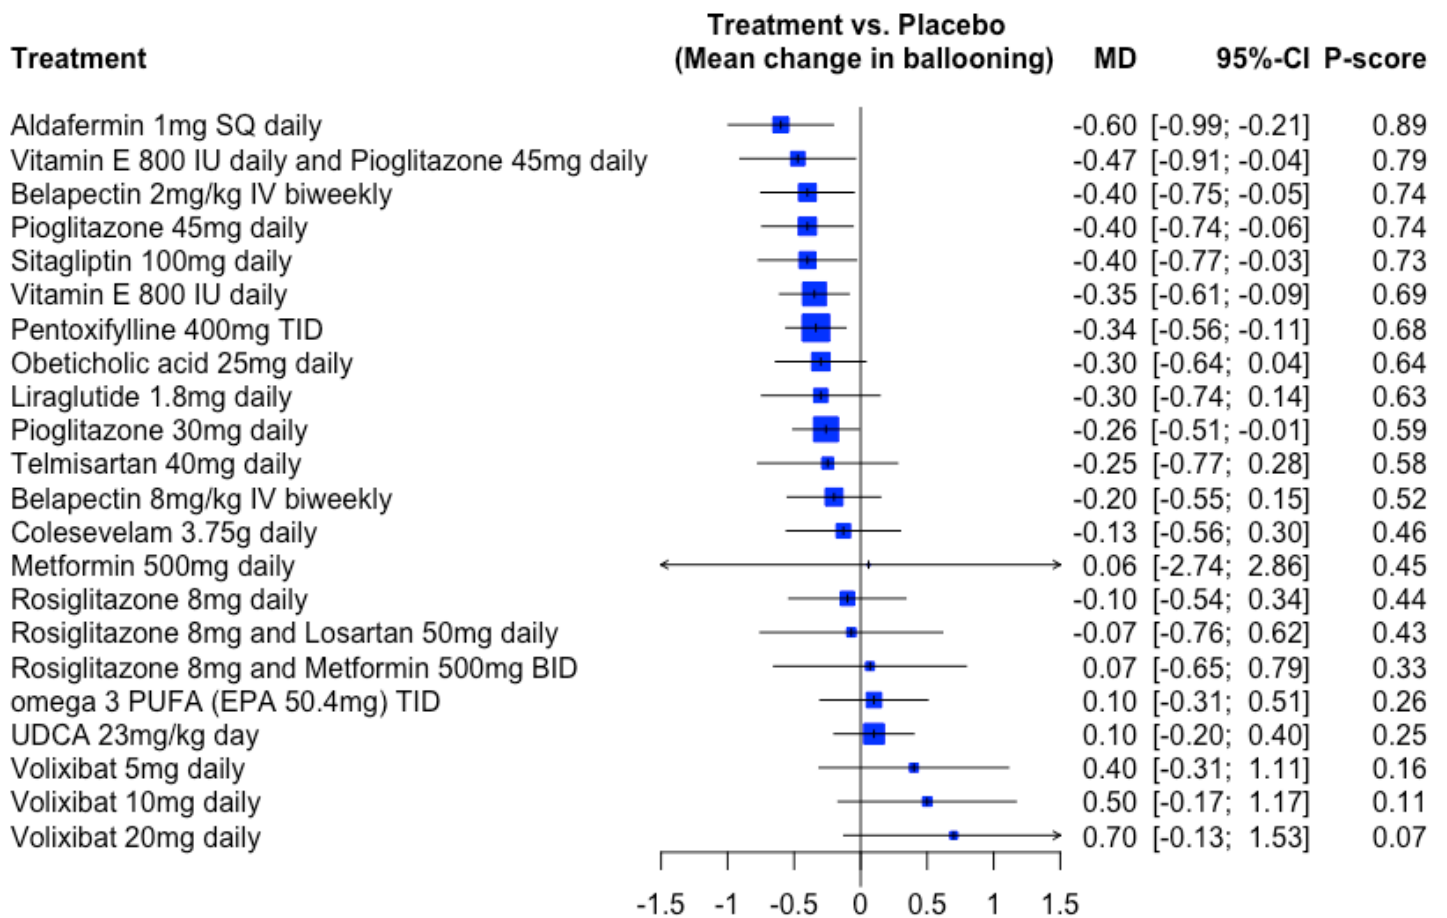

Forest plot for the mean change in hepatocellular ballooning score compared from baseline to end of treatment. All treatments are reported in comparison to placebo and sorted in order of relative treatment rank. Relative treatment rank is derived from the P-score, which ranges from 1 (best) to 0 (worst). In other words, a P-score closer to 1 indicates a greater probability of achieving the highest ranking, whereas a P-score approaching 0 would indicate a greater probability of achieving the worst ranking.

e-Figure 18: Mean change in fibrosis

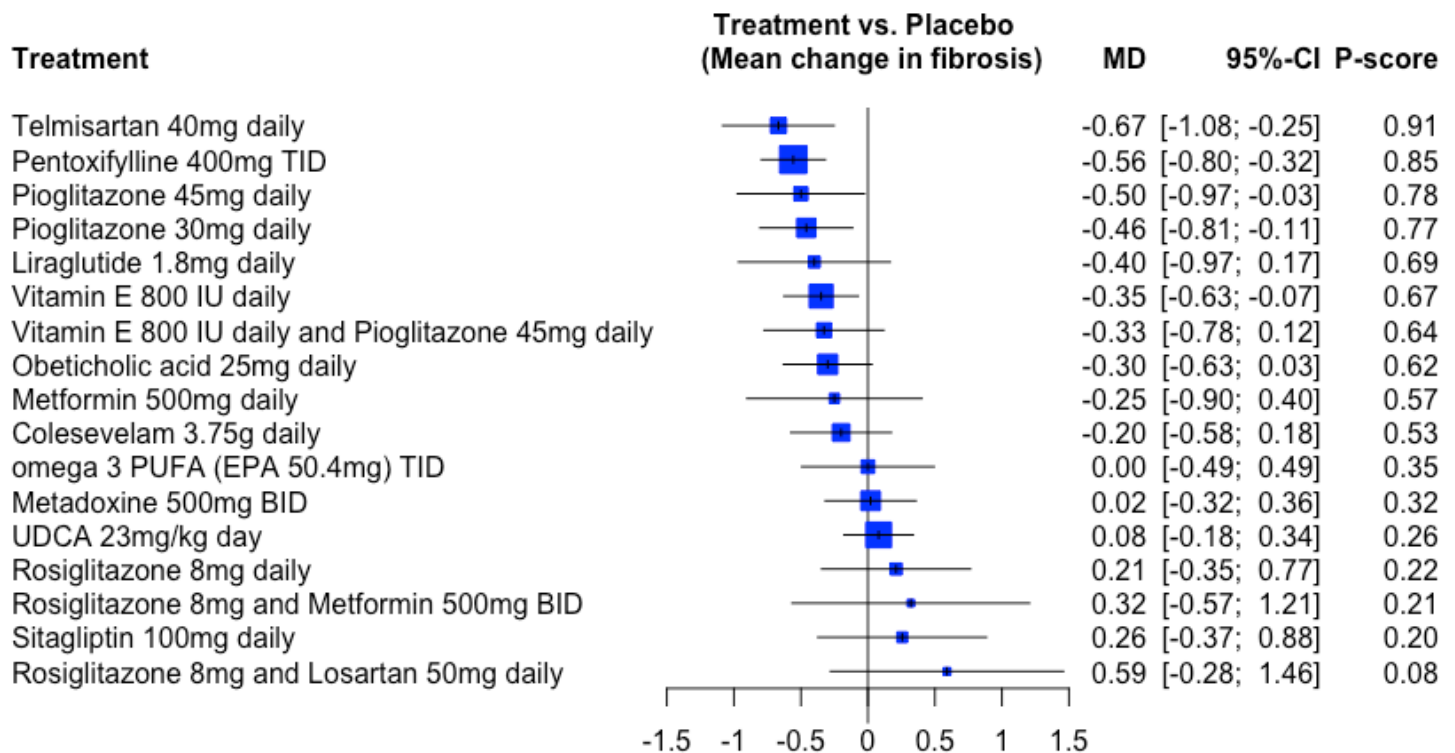

Forest plot for the mean change in fibrosis score compared from baseline to end of treatment. All treatments are reported in comparison to placebo and sorted in order of relative treatment rank. Relative treatment rank is derived from the P-score, which ranges from 1 (best) to 0 (worst). In other words, a P-score closer to 1 indicates a greater probability of achieving the highest ranking, whereas a P-score approaching 0 would indicate a greater probability of achieving the worst ranking.



## Appendix 6: Risk of bias assessment of included randomized controlled trials using the revised Cochrane Risk of Bias tool [RoB 2]

| Study                                  | <u>Bias arising from the randomization process</u> | <u>Bias due to deviations from intended interventions</u> | <u>Bias due to missing outcome data</u> | <u>Bias in the measurement of the outcome</u> | <u>Bias in selection of the reported result</u> | Overall risk of bias |
|----------------------------------------|----------------------------------------------------|-----------------------------------------------------------|-----------------------------------------|-----------------------------------------------|-------------------------------------------------|----------------------|
| Ratziu et al., 2020                    | Low risk                                           | Low risk                                                  | Low risk                                | High risk                                     | Low risk                                        | Some concern         |
| Harrison, Neff, et al., 2020           | Low risk                                           | Low risk                                                  | Low risk                                | Low risk                                      | Low risk                                        | Low risk             |
| Newsome, Palmer, et al., 2020          | Low risk                                           | Low risk                                                  | Low risk                                | Low risk                                      | Low risk                                        | Low risk             |
| Harrison, Wong, et al., 2020           | Low risk                                           | Low risk                                                  | Low risk                                | Low risk                                      | Low risk                                        | Low risk             |
| Harrison, Alkhouri, et al., 2020       | Low risk                                           | Low risk                                                  | Low risk                                | Low risk                                      | Low risk                                        | Low risk             |
| Chalasanani et al., 2020               | Low risk                                           | Low risk                                                  | Some concern                            | Low risk                                      | Low risk                                        | Low risk             |
| Ratziu et al., 2016                    | Low risk                                           | Low risk                                                  | Some concern                            | Low risk                                      | Low risk                                        | Low risk             |
| Younossi et al., 2019                  | Low risk                                           | Low risk                                                  | Low risk                                | Low risk                                      | Low risk                                        | Low risk             |
| Bril et al., 2019                      | Low risk                                           | Low risk                                                  | Low risk                                | Low risk                                      | Low risk                                        | Low risk             |
| Armstrong et al., 2016                 | Low risk                                           | Low risk                                                  | Some concern                            | Low risk                                      | Low risk                                        | Low risk             |
| Neuschwander-Tetri et al., 2015        | Low risk                                           | Low risk                                                  | Low risk                                | Low risk                                      | Low risk                                        | Low risk             |
| Sanyal et al., 2014                    | Low risk                                           | Low risk                                                  | Low risk                                | Low risk                                      | Low risk                                        | Low risk             |
| Shenoy et al., 2014                    | Some concern                                       | Low risk                                                  | Low risk                                | Some concern                                  | Low risk                                        | Some concern         |
| Leuschner et al., 2010                 | Some concern                                       | Low risk                                                  | Some concern                            | Low risk                                      | Low risk                                        | Some concern         |
| Sanyal et al., 2010                    | Low risk                                           | Low risk                                                  | Low risk                                | Low risk                                      | Low risk                                        | Low risk             |
| Harrison, Wong, et al., 2020 cirrhosis | Low risk                                           | Low risk                                                  | Low risk                                | Low risk                                      | Low risk                                        | Low risk             |
| Harrison et al., 2018 cirrhosis        | Some concern                                       | Low risk                                                  | Some concern                            | Low risk                                      | Low risk                                        | Some concern         |
| Harrison, Goodman, et al., 2020        | Low risk                                           | Low risk                                                  | Low risk                                | Low risk                                      | Low risk                                        | Low risk             |
| Alam et al., 2020                      | High risk                                          | High risk                                                 | Low risk                                | Low risk                                      | Low risk                                        | High risk            |
| Sarin et al., 2020                     | High risk                                          | High risk                                                 | Low risk                                | Some concern                                  | Low risk                                        | High risk            |
| Harrison et al., 2019                  | Low risk                                           | Low risk                                                  | Some concern                            | Low risk                                      | Low risk                                        | Low risk             |
| Navarro et al., 2019                   | Low risk                                           | Low risk                                                  | Some concern                            | Low risk                                      | Low risk                                        | Low risk             |
| Alam et al., 2018                      | High risk                                          | High risk                                                 | Low risk                                | Low risk                                      | Low risk                                        | High risk            |
| McPherson et al., 2018                 | Low risk                                           | Low risk                                                  | Some concern                            | Low risk                                      | Low risk                                        | Low risk             |

|                         |              |           |              |              |          |              |
|-------------------------|--------------|-----------|--------------|--------------|----------|--------------|
| Alam et al., 2017       | High risk    | High risk | Low risk     | Low risk     | Low risk | High risk    |
| Joy et al., 2017        | Low risk     | Low risk  | Low risk     | Some concern | Low risk | Low risk     |
| Cusi et al., 2016       | Low risk     | Low risk  | Low risk     | Low risk     | Low risk | Low risk     |
| Nogueira et al., 2016   | Low risk     | Low risk  | Some concern | Low risk     | Low risk | Low risk     |
| Alam et al., 2016       | Some concern | High risk | Some concern | Low risk     | Low risk | High risk    |
| Loomba et al., 2015     | Low risk     | Low risk  | Some concern | Low risk     | Low risk | Low risk     |
| Dasarathy et al., 2015  | Some concern | Low risk  | Low risk     | Low risk     | Low risk | Low risk     |
| Argo et al., 2015       | Some concern | Low risk  | Low risk     | Low risk     | Low risk | Low risk     |
| Sharma et al., 2012     | Some concern | High risk | Low risk     | Low risk     | Low risk | High risk    |
| Le et al., 2012         | Low risk     | Low risk  | Low risk     | Low risk     | Low risk | Low risk     |
| Torres et al., 2011     | Low risk     | High risk | Some concern | Low risk     | Low risk | High risk    |
| Zein et al., 2011       | Some concern | Low risk  | Low risk     | Low risk     | Low risk | Low risk     |
| van Wagner et al., 2011 | Low risk     | Low risk  | Some concern | Low risk     | Low risk | Low risk     |
| Shields et al., 2009    | Some concern | Low risk  | Some concern | Low risk     | Low risk | Some concern |
| Ratziu et al., 2008     | Low risk     | Low risk  | Low risk     | Low risk     | Low risk | Low risk     |
| Harrison et al., 2018   | Some concern | Low risk  | Some concern | Low risk     | Low risk | Some concern |

Reference: Sterne JAC, Savović J, Page MJ, et al. RoB 2: a revised tool for assessing risk of bias in randomised trials. *Bmj* 2019;366:l4898.

## Appendix 7: Assessment of global inconsistency across networks

| Network Outcome                                     | Chi-square | P value* |
|-----------------------------------------------------|------------|----------|
| ≥ 2-point decrease in NAFLD Activity Score [NAS]    | 2.31       | 0.32     |
| NASH resolution without worsening fibrosis          | 0.60       | 0.74     |
| Fibrosis improvement without worsening NASH         | 2.01       | 0.37     |
| Fibrosis improvement regardless of NASH progression | 0.13       | 0.72     |
| Mean change in NAS                                  | 3.53       | 0.06     |
| Mean change in steatosis                            | 0.02       | 0.99     |
| Mean change in lobular inflammation                 | 0.95       | 0.62     |
| Mean change in hepatocellular ballooning            | 0.73       | 0.70     |
| Mean change in fibrosis                             | 5.77       | 0.12     |

\*P value is calculated in order to test of global inconsistency using the "design by treatment" interaction model. Abbreviations: NAS, NAFLD Activity Score; NASH, nonalcoholic steatohepatitis

## Appendix 8: Visualization of inconsistency within the network using network heat plots

e-Figure 19:  $\geq 2$ -point decrease in NAFLD Activity Score [NAS]

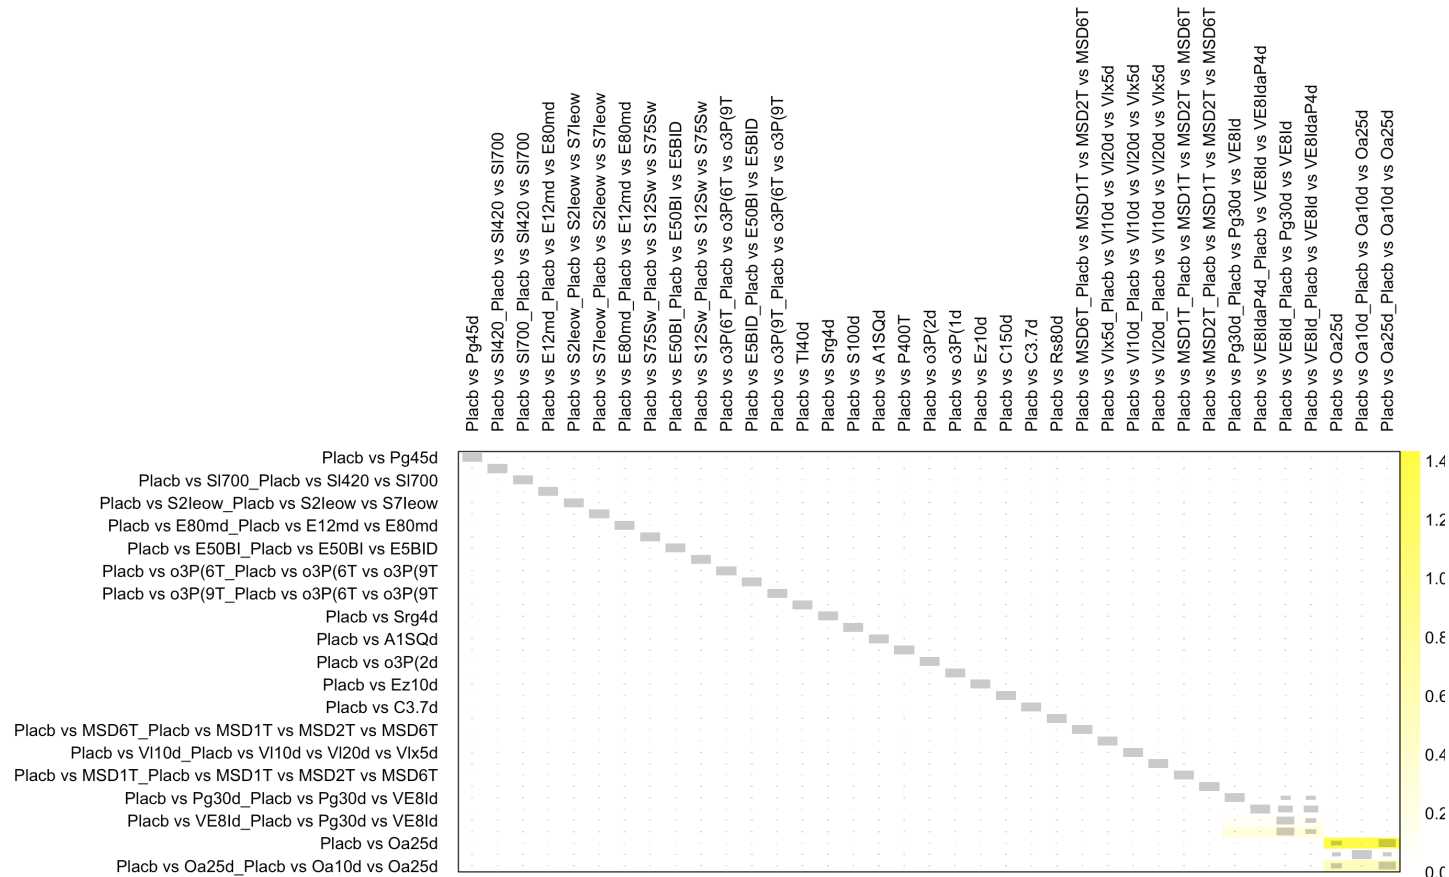

Net heat plot for patients achieving  $\geq 2$ -point decrease in NAFLD Activity Score [NAS]. Studies reporting both direct and indirect evidence are assessed here for inconsistency using a random effects model, with rows and columns representing study designs rather than treatment comparisons. Each grey box is a direct correlate of the magnitude of the direct evidence contributing towards the overall network estimate. Boxes are also illustrated with a colored background, which ranges from blue to red. The color of the box signifies the inconsistency of a particular comparison in a row with respect to the design in a column, with red representing the highest degree of inconsistency and blue the least. Inconsistency is calculated as the difference between direct and indirect evidence within the network estimate. If present, studies with the highest level of inconsistency will be demonstrated in the upper-left corner in red.

e-Figure 20: NASH resolution without worsening fibrosis

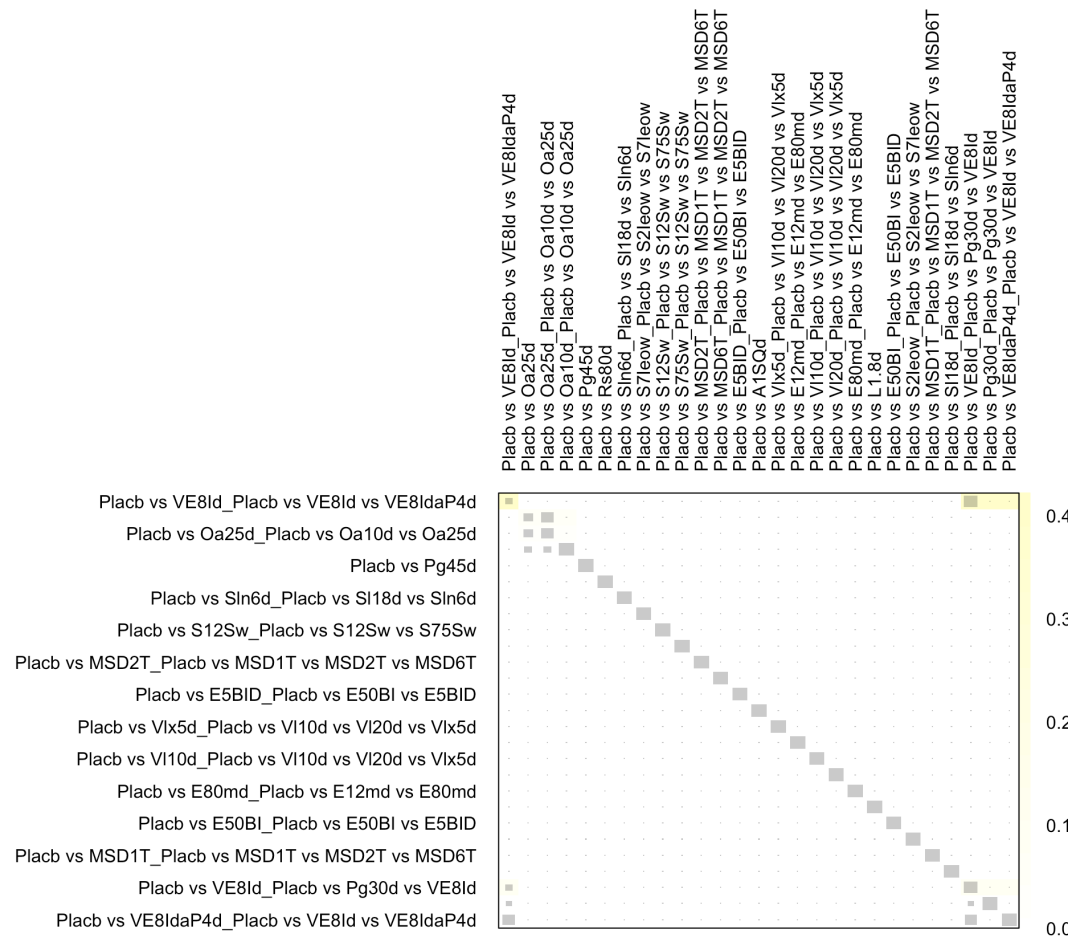

Net heat plot for patients achieving NASH resolution without worsening fibrosis. Studies reporting both direct and indirect evidence are assessed here for inconsistency using a random effects model, with rows and columns representing study designs rather than treatment comparisons. Each grey box is a direct correlate of the magnitude of the direct evidence contributing towards the overall network estimate. Boxes are also illustrated with a colored background, which ranges from blue to red. The color of the box signifies the inconsistency of a particular comparison in a row with respect to the design in a column, with red representing the highest degree of inconsistency and blue the least. Inconsistency is calculated as the difference between direct and indirect evidence within the network estimate. If present, studies with the highest level of inconsistency will be demonstrated in the upper-left corner in red.

e-Figure 21: Fibrosis improvement without worsening NASH

Net heat plot not available because the network does not contain any loop along more than one design.

e-Figure 22: Fibrosis improvement regardless of NASH progression

Net heat plot not available because the network does not contain any loop along more than one design.

e-Figure 23: Mean change in NAFLD Activity Score [NAS]

Net heat plot not available because detaching single designs leads to a network without loops.

e-Figure 24: Mean change in steatosis

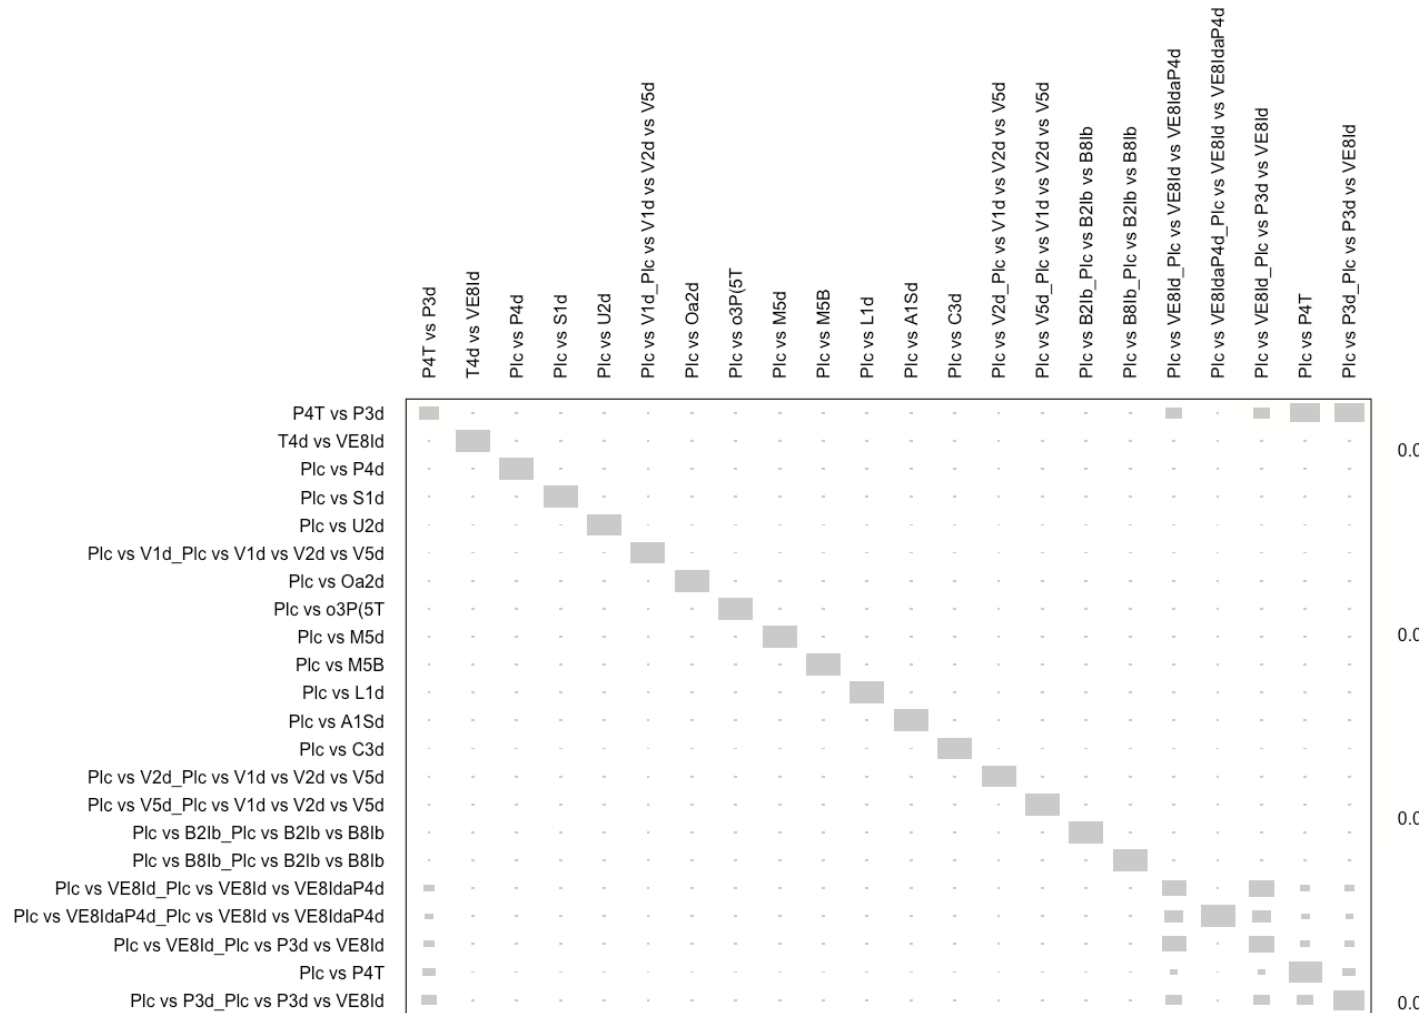

Net heat plot for the mean change in steatosis score compared from baseline to end of treatment. Studies reporting both direct and indirect evidence are assessed here for inconsistency using a random effects model, with rows and columns representing study designs rather than treatment comparisons. Each grey box is a direct correlate of the magnitude of the direct evidence contributing towards the overall network estimate. Boxes are also illustrated with a colored background, which ranges from blue to red. The color of the box signifies the inconsistency of a particular comparison in a row with respect to the design in a column, with red representing the highest degree of inconsistency and blue the least. Inconsistency is calculated as the difference between direct and indirect evidence within the network estimate. If present, studies with the highest level of inconsistency will be demonstrated in the upper-left corner in red.

e-Figure 25: Mean change in lobular inflammation

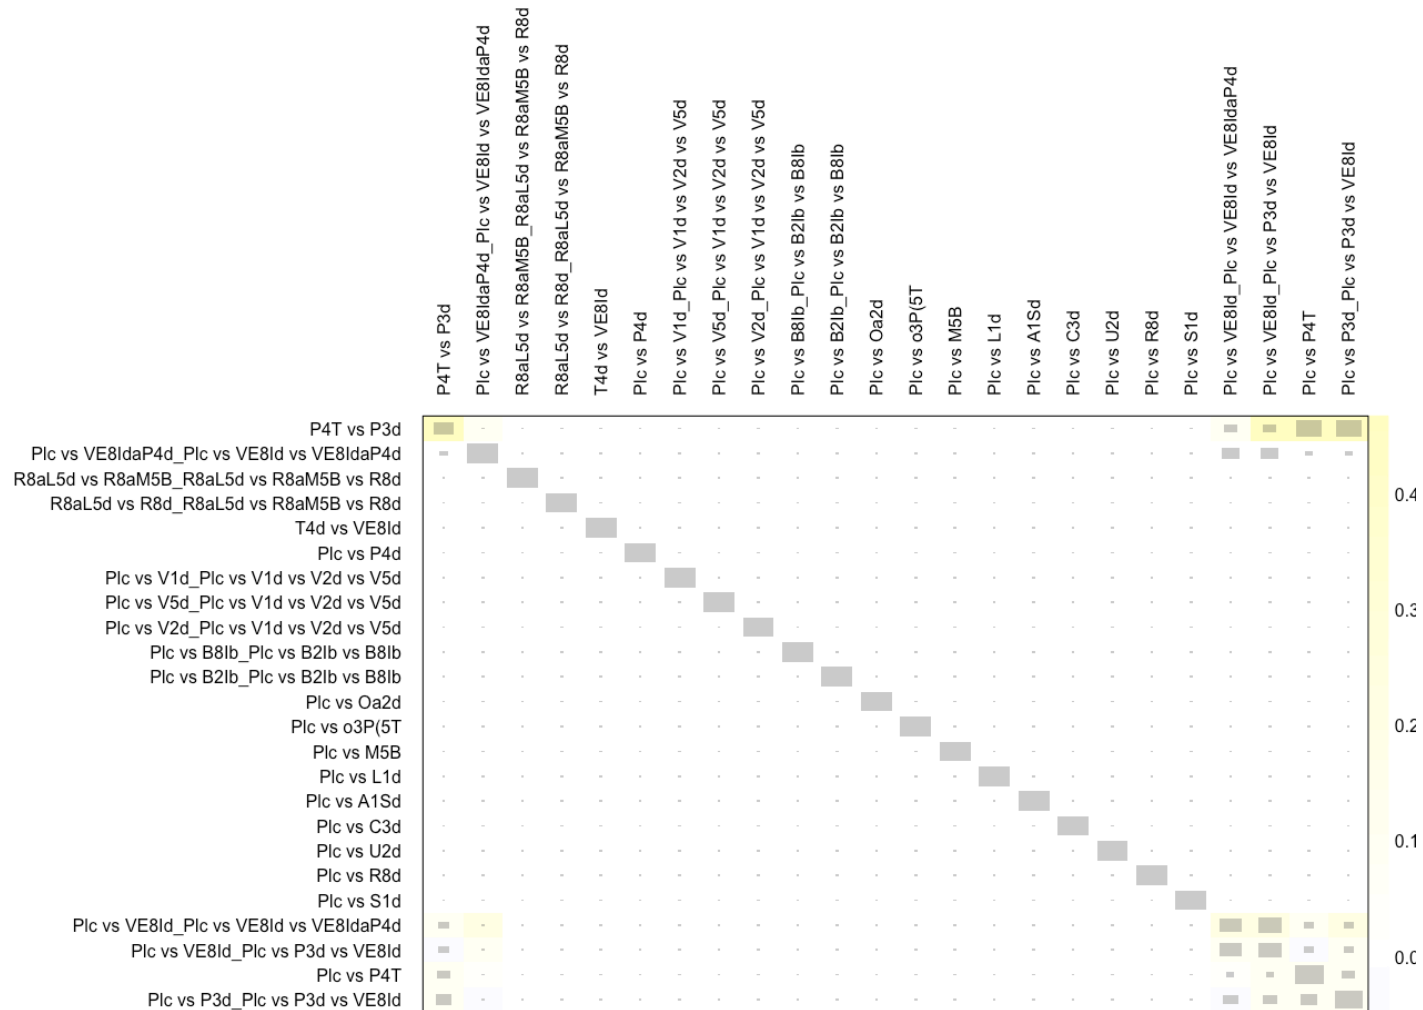

Net heat plot for the mean change in lobular inflammation score compared from baseline to end of treatment. Studies reporting both direct and indirect evidence are assessed here for inconsistency using a random effects model, with rows and columns representing study designs rather than treatment comparisons. Each grey box is a direct correlate of the magnitude of the direct evidence contributing towards the overall network estimate. Boxes are also illustrated with a colored background, which ranges from blue to red. The color of the box signifies the inconsistency of a particular comparison in a row with respect to the design in a column, with red representing the highest degree of inconsistency and blue the least. Inconsistency is calculated as the difference between direct and indirect evidence within the network estimate. If present, studies with the highest level of inconsistency will be demonstrated in the upper-left corner in red.



e-Figure 26: Mean change in hepatocellular ballooning

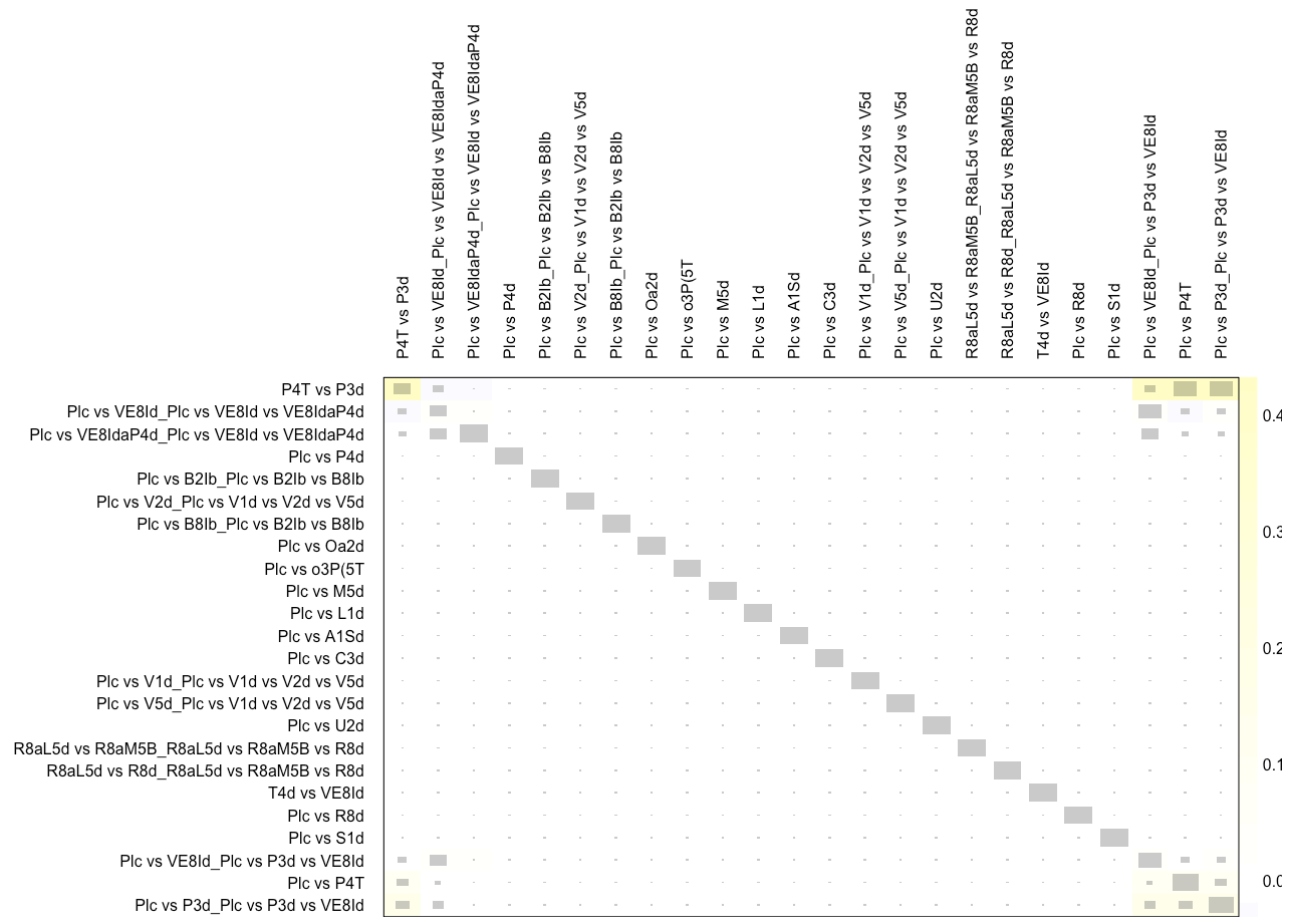

Net heat plot for the mean change in hepatocellular ballooning score compared from baseline to end of treatment. Studies reporting both direct and indirect evidence are assessed here for inconsistency using a random effects model, with rows and columns representing study designs rather than treatment comparisons. Each grey box is a direct correlate of the magnitude of the direct evidence contributing towards the overall network estimate. Boxes are also illustrated with a colored background, which ranges from blue to red. The color of the box signifies the inconsistency of a particular comparison in a row with respect to the design in a column, with red representing the highest degree of inconsistency and blue the least. Inconsistency is calculated as the difference between direct and indirect evidence within the network estimate. If present, studies with the highest level of inconsistency will be demonstrated in the upper-left corner in red.

e-Figure 27: Mean change in fibrosis

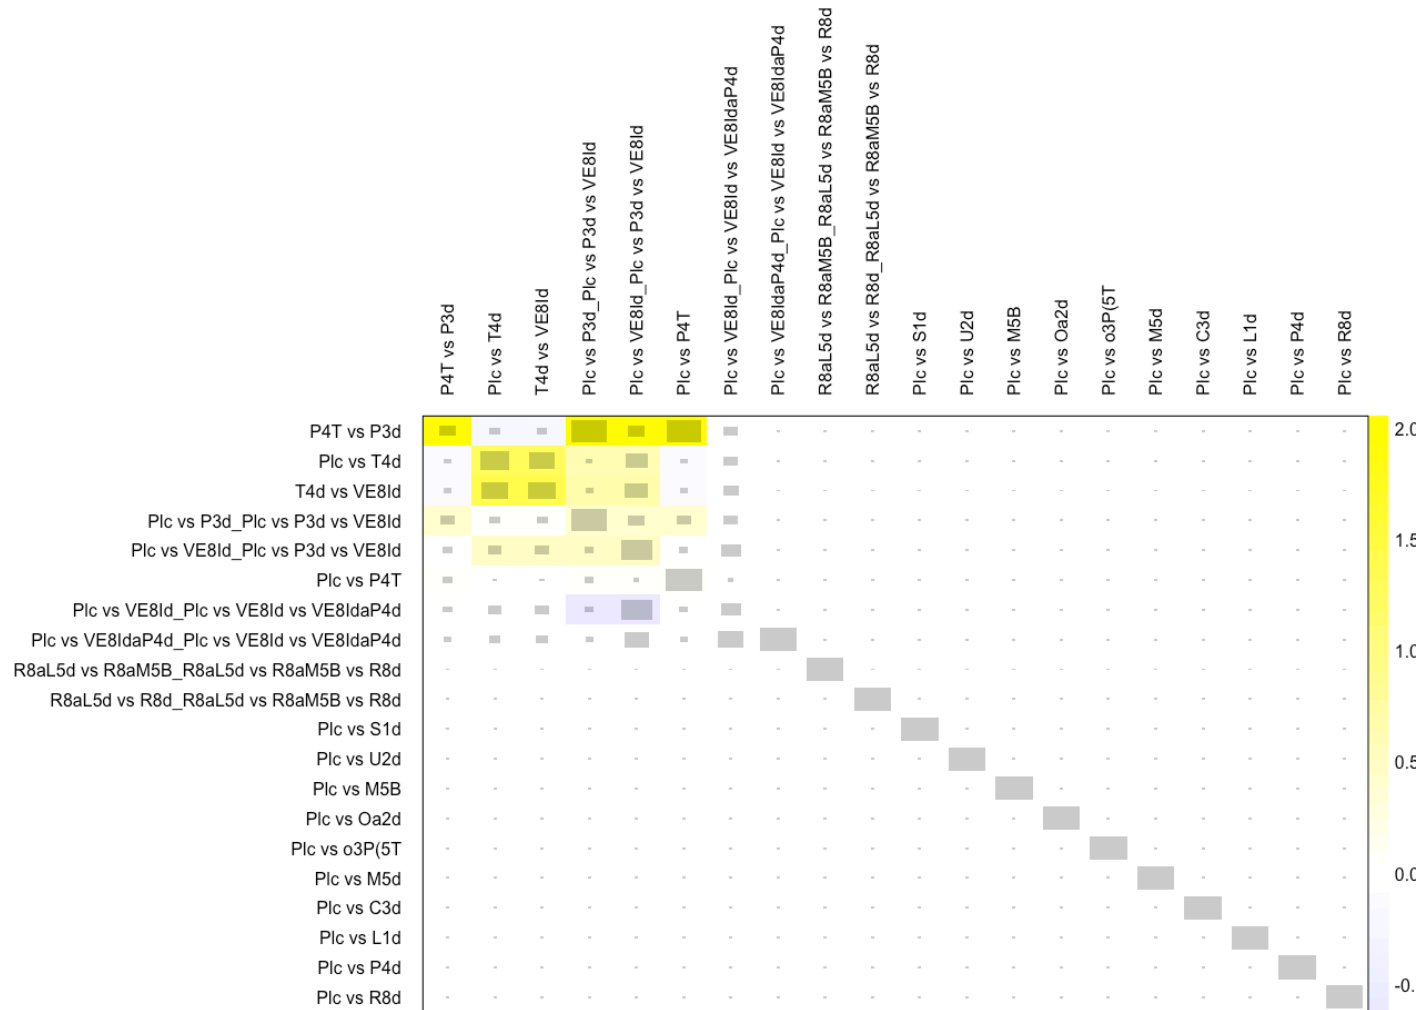

Net heat plot for the mean change in fibrosis score compared from baseline to end of treatment. Studies reporting both direct and indirect evidence are assessed here for inconsistency using a random effects model, with rows and columns representing study designs rather than treatment comparisons. Each grey box is a direct correlate of the magnitude of the direct evidence contributing towards the overall network estimate. Boxes are also illustrated with a colored background, which ranges from blue to red. The color of the box signifies the inconsistency of a particular comparison in a row with respect to the design in a column, with red representing the highest degree of inconsistency and blue the least. Inconsistency is calculated as the difference between direct and indirect evidence within the network estimate. If present, studies with the highest level of inconsistency will be demonstrated in the upper-left corner in red.

## Appendix 9: Visualization of inconsistency within networks via forest plots of node splitting

e-Figure 28:  $\geq 2$ -point decrease in NAFLD Activity Score [NAS]

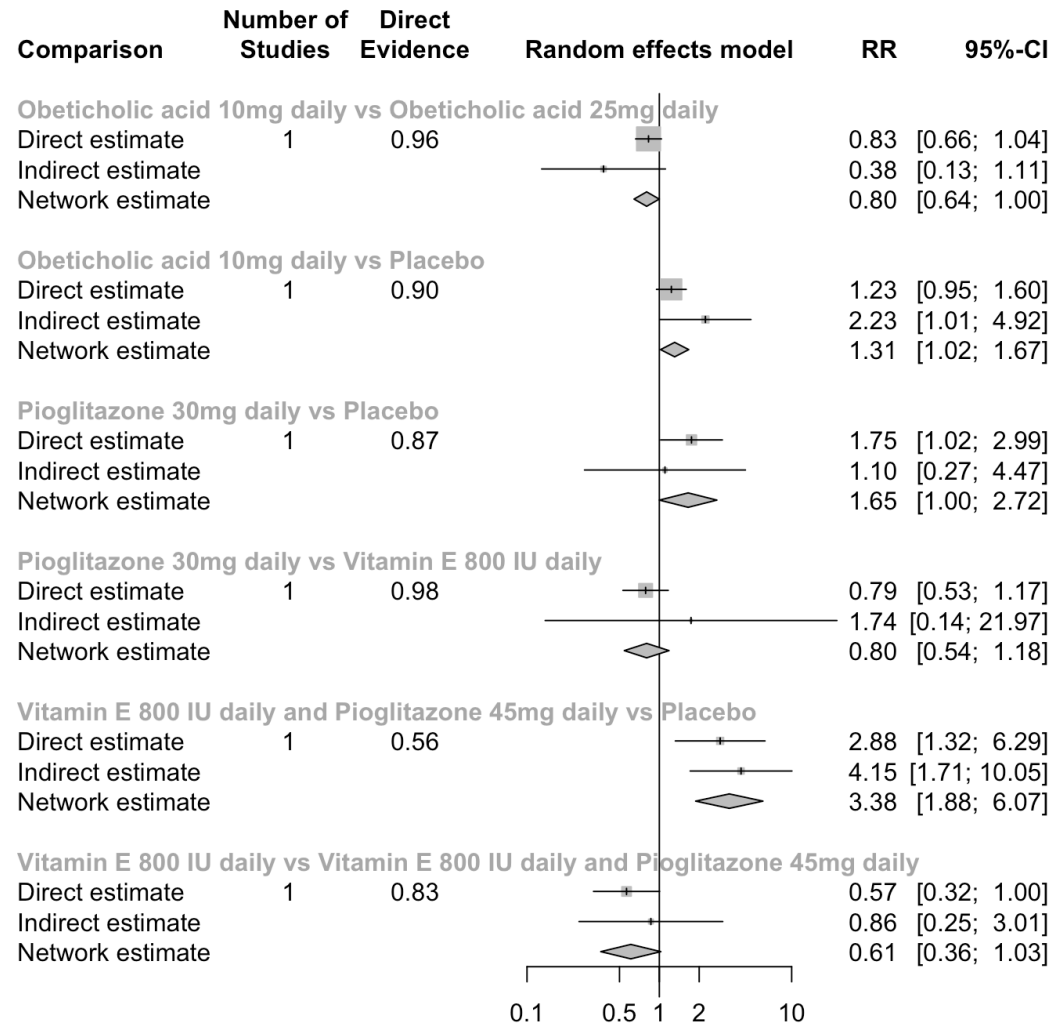

Forest plot of net split results for patients achieving  $\geq 2$ -point decrease in NAFLD Activity Score [NAS]. Net split results are a function of splitting network estimates based upon their contribution of direct and indirect evidence in order to assess local inconsistency in the network. Two functions are utilized via the random effects model in order to obtain the indirect estimates, which are the Separate Indirect from Direct Evidence (SIDE) using a back-calculation method, in addition to the Separate Indirect from Direct Design Evidence (SIDDE).

e-Figure 29: NASH resolution without worsening fibrosis

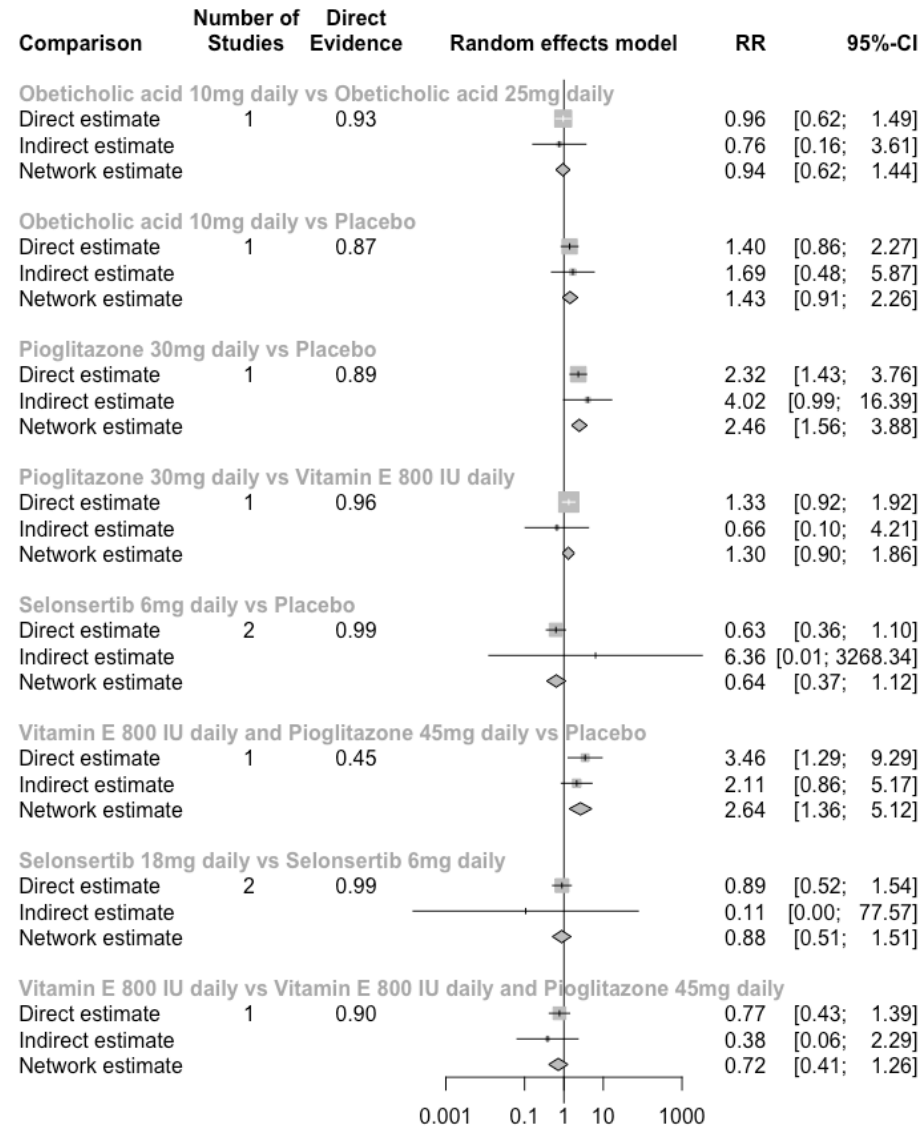

Forest plot of net split results for patients achieving NASH resolution without worsening fibrosis. Net split results are a function of splitting network estimates based upon their contribution of direct and indirect evidence in order to assess local inconsistency in the network. Two functions are utilized via the random effects model in order to obtain the indirect estimates, which are the Separate Indirect from Direct Evidence (SIDE) using a back-calculation method, in addition to the Separate Indirect from Direct Design Evidence (SIDDE).

e-Figure 30: Fibrosis improvement without worsening NASH

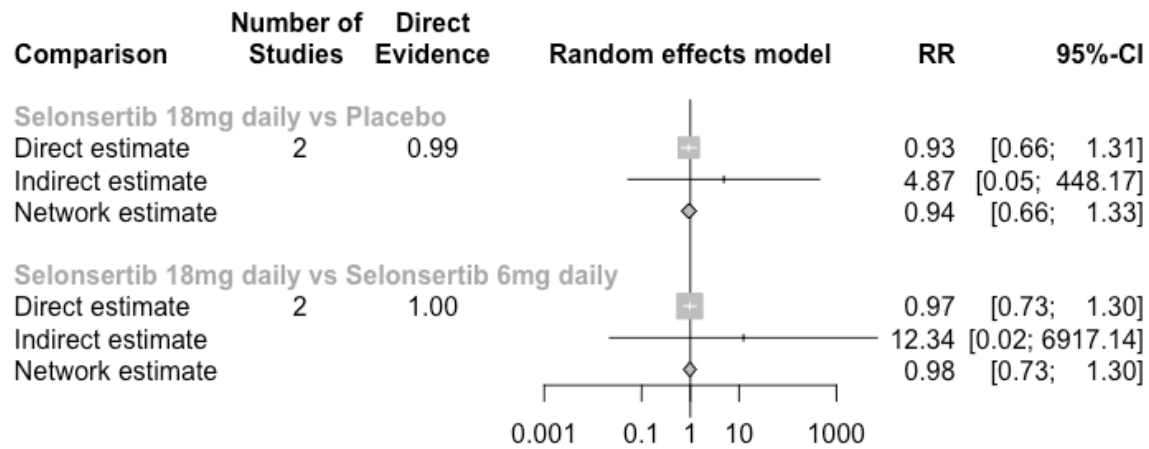

Forest plot of net split results for patients achieving fibrosis improvement without worsening NASH. Net split results are a function of splitting network estimates based upon their contribution of direct and indirect evidence in order to assess local inconsistency in the network. Two functions are utilized via the random effects model in order to obtain the indirect estimates, which are the Separate Indirect from Direct Evidence (SIDE) using a back-calculation method, in addition to the Separate Indirect from Direct Design Evidence (SIDDE).

e-Figure 31: Fibrosis improvement regardless of NASH progression

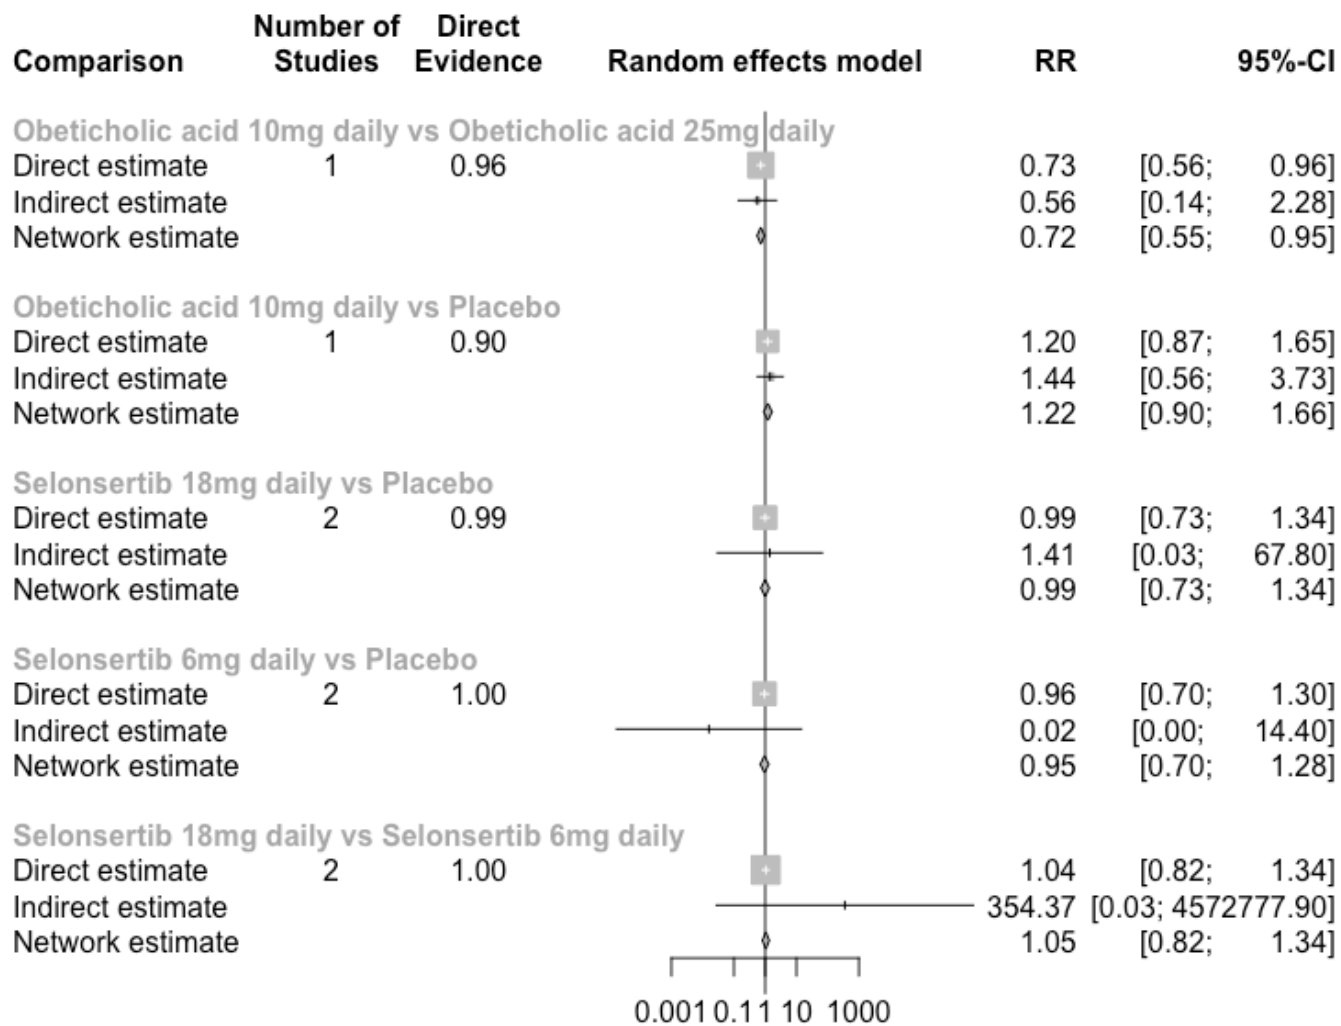

Forest plot of net split results for patients achieving fibrosis improvement regardless of NASH progression. Net split results are a function of splitting network estimates based upon their contribution of direct and indirect evidence in order to assess local inconsistency in the network. Two functions are utilized via the random effects model in order to obtain the indirect estimates, which are the Separate Indirect from Direct Evidence (SIDE) using a back-calculation method, in addition to the Separate Indirect from Direct Design Evidence (SIDDE).

e-Figure 32: Mean change in NAFLD Activity Score [NAS]

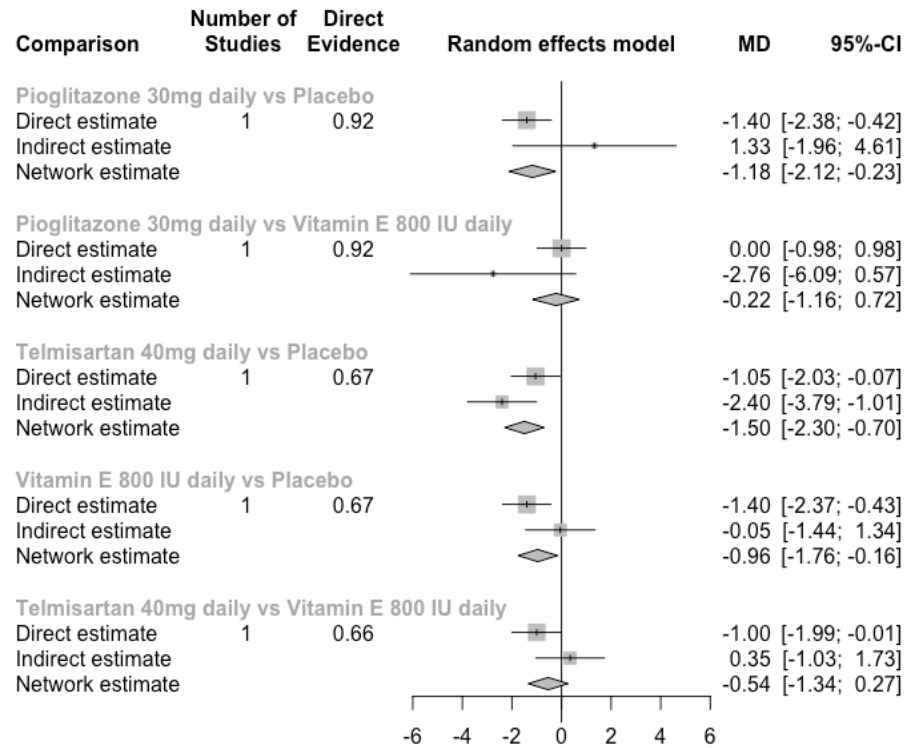

Forest plot of net split results for the mean change in NAFLD activity score [NAS] compared from baseline to end of treatment. Net split results are a function of splitting network estimates based upon their contribution of direct and indirect evidence in order to assess local inconsistency in the network. Two functions are utilized via the random effects model in order to obtain the indirect estimates, which are the Separate Indirect from Direct Evidence (SIDE) using a back-calculation method, in addition to the Separate Indirect from Direct Design Evidence (SIDDE).

e-Figure 33: Mean change in steatosis

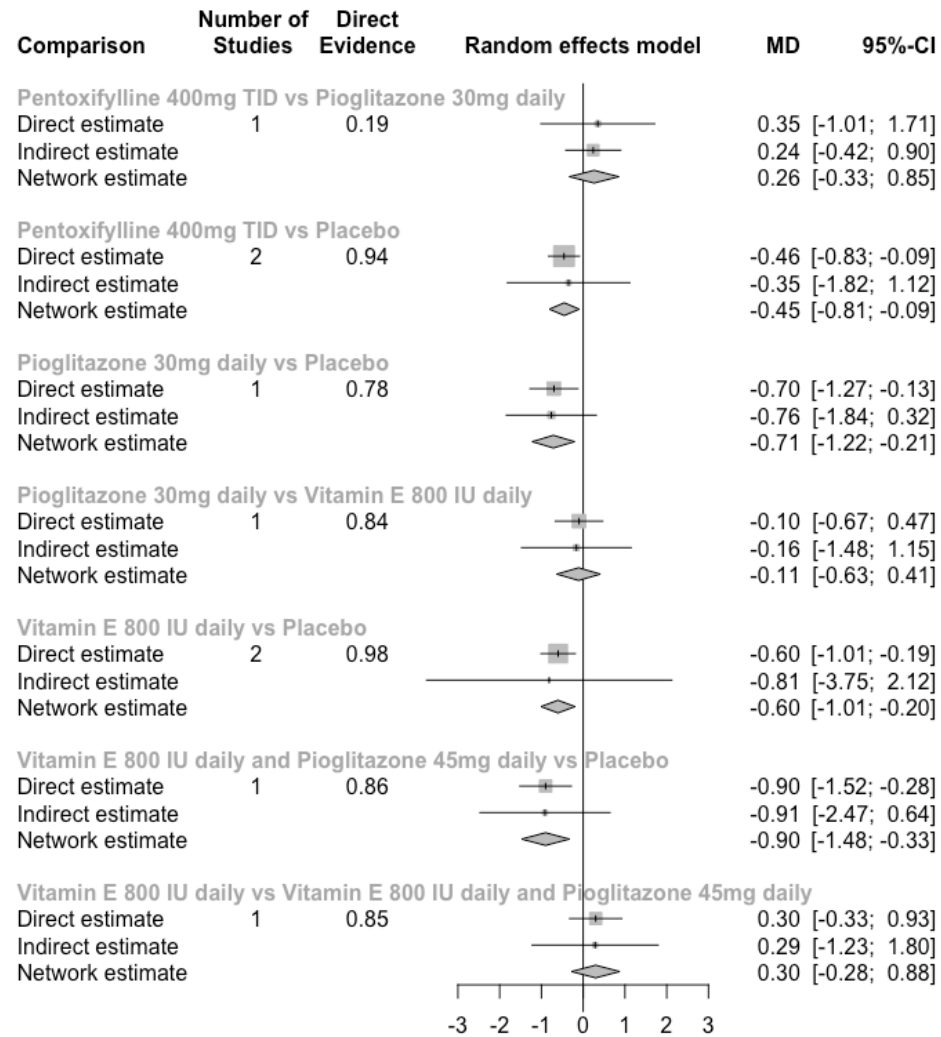

Forest plot of net split results for the mean change in steatosis score compared from baseline to end of treatment. Net split results are a function of splitting network estimates based upon their contribution of direct and indirect evidence in order to assess local inconsistency in the network. Two functions are utilized via the random effects model in order to obtain the indirect estimates, which are the Separate Indirect from Direct Evidence (SIDE) using a back-calculation method, in addition to the Separate Indirect from Direct Design Evidence (SIDDE).



e-Figure 34: Mean change in lobular inflammation

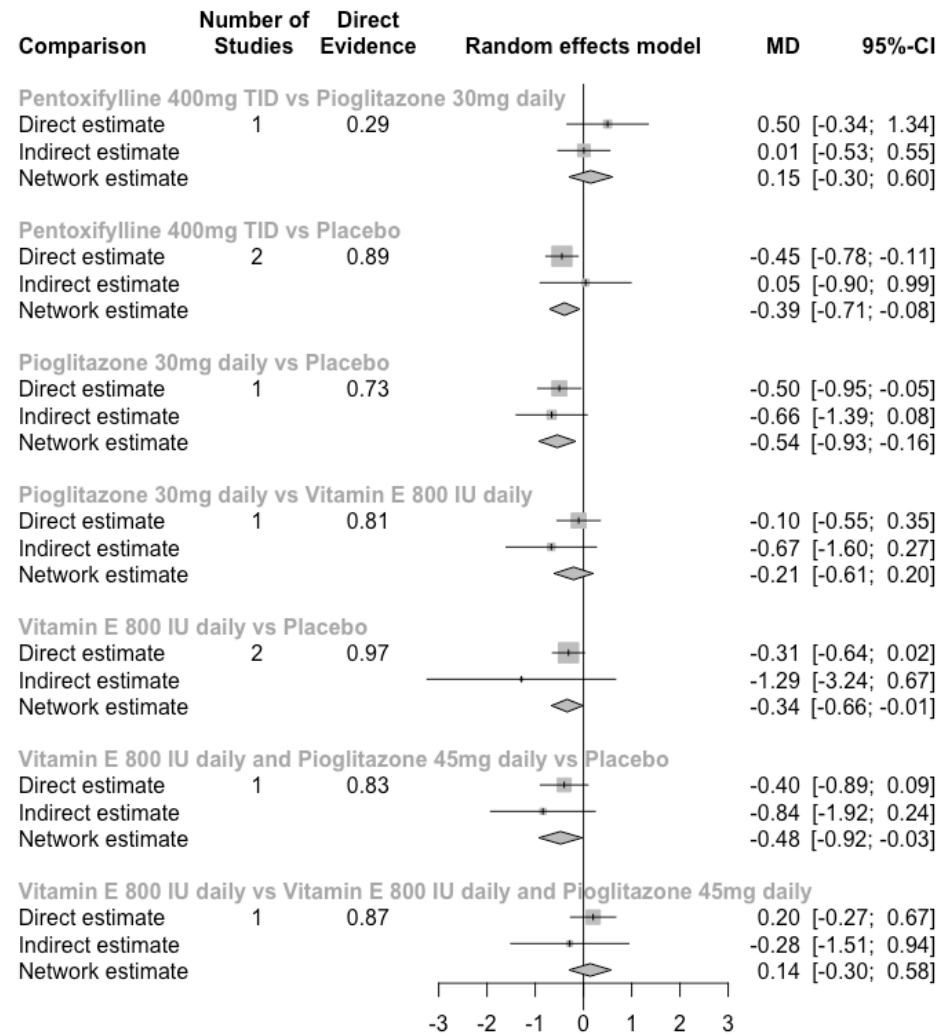

Forest plot of net split results for the mean change in lobular inflammation score compared from baseline to end of treatment. Net split results are a function of splitting network estimates based upon their contribution of direct and indirect evidence in order to assess local inconsistency in the network. Two functions are utilized via the random effects model in order to obtain the indirect estimates, which are the Separate Indirect from Direct Evidence (SIDE) using a back-calculation method, in addition to the Separate Indirect from Direct Design Evidence (SIDDE).

e-Figure 35: Mean change in hepatocellular ballooning

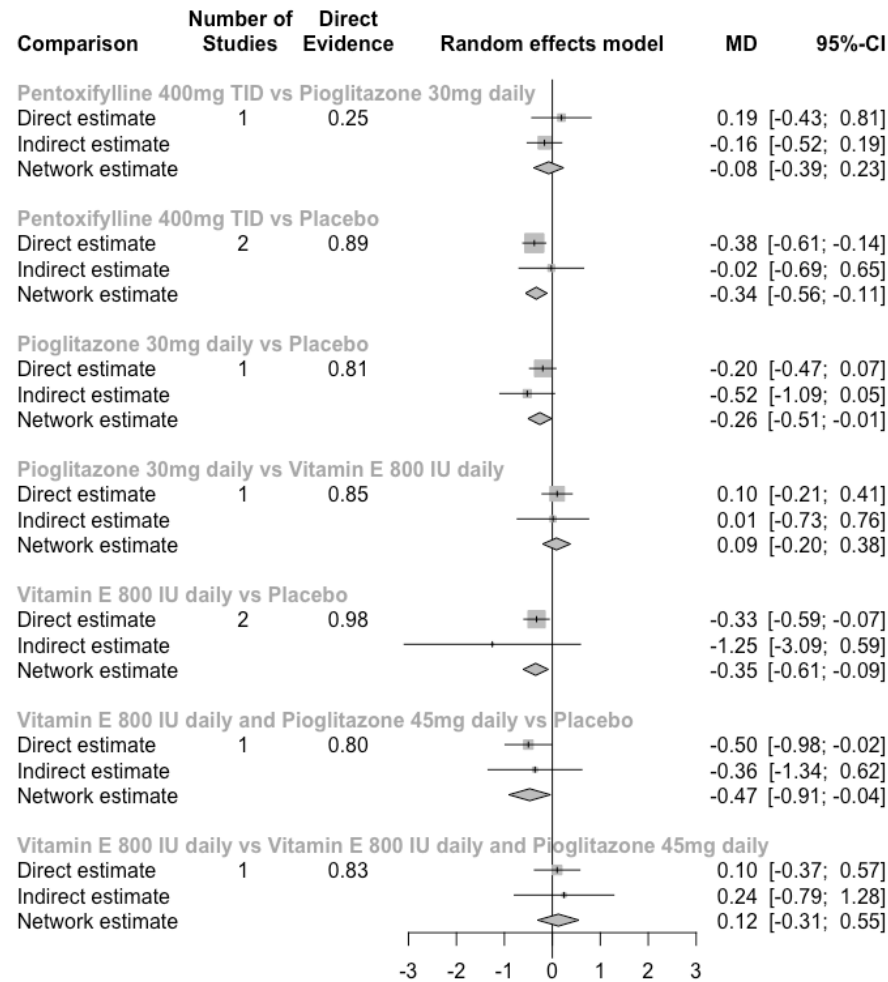

Forest plot of net split results for the mean change in hepatocellular ballooning score compared from baseline to end of treatment. Net split results are a function of splitting network estimates based upon their contribution of direct and indirect evidence in order to assess local inconsistency in the network. Two functions are utilized via the random effects model in order to obtain the indirect estimates, which are the Separate Indirect from Direct Evidence (SIDE) using a back-calculation method, in addition to the Separate Indirect from Direct Design Evidence (SIDDE).

e-Figure 36: Mean change in fibrosis

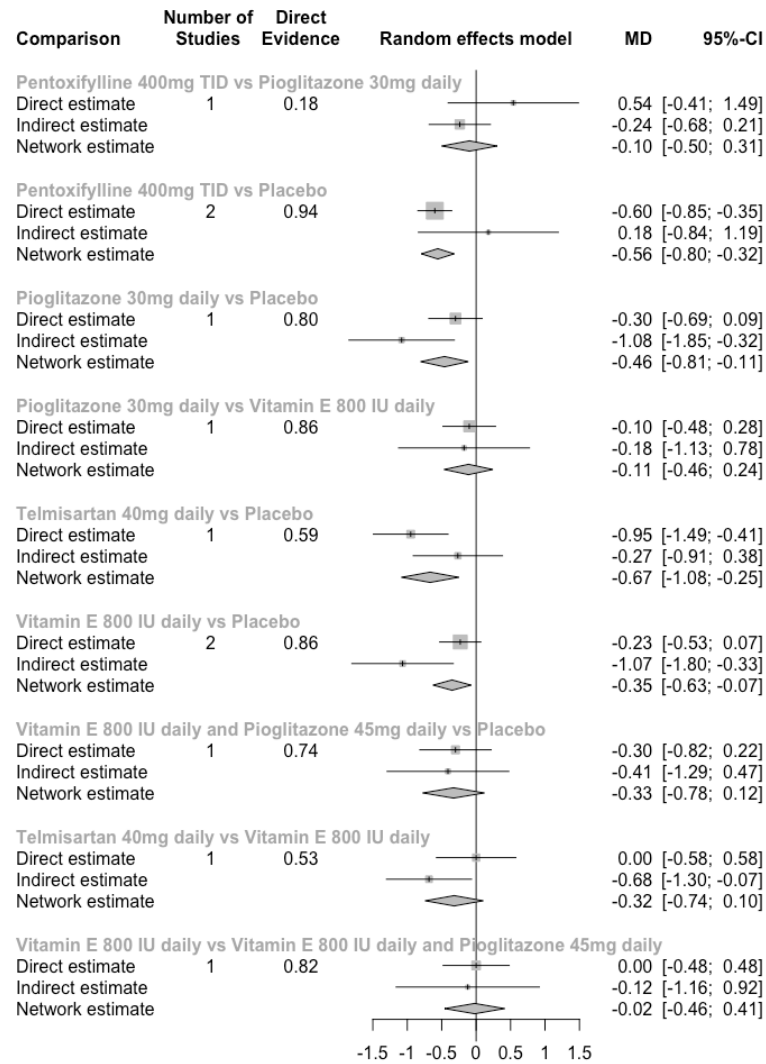

Forest plot of net split results for the mean change in fibrosis score compared from baseline to end of treatment. Net split results are a function of splitting network estimates based upon their contribution of direct and indirect evidence in order to assess local inconsistency in the network. Two functions are utilized via the random effects model in order to obtain the indirect estimates, which are the Separate Indirect from Direct Evidence (SIDE) using a back-calculation method, in addition to the Separate Indirect from Direct Design Evidence (SIDDE).

## Appendix 10: Assessment of inconsistency within the closed loops of each network

| <b>≥ 2-point decrease in NAFLD Activity Score [NAS]</b>                      |                   |                               |                  |                |                 |                |                   |                    |            |                  |         |
|------------------------------------------------------------------------------|-------------------|-------------------------------|------------------|----------------|-----------------|----------------|-------------------|--------------------|------------|------------------|---------|
| Treatment Comparison                                                         | Number of studies | Proportion of direct evidence | Network Estimate | 95% CI         | Direct Estimate | 95% CI         | Indirect Estimate | 95% CI             | RoR        | 95% CI           | p-value |
| Obeticholic acid 10mg daily vs Obeticholic acid 25mg daily                   | 1                 | 0.96                          | 0.80             | [0.64; 1.00]   | 0.83            | [0.66; 1.04]   | 0.38              | [0.13; 1.11]       | 2.19       | [0.73; 6.57]     | 0.16    |
| Obeticholic acid 10mg daily vs Placebo                                       | 1                 | 0.90                          | 1.31             | [1.02; 1.67]   | 1.23            | [0.95; 1.60]   | 2.23              | [1.01; 4.92]       | 0.55       | [0.24; 1.27]     | 0.16    |
| Pioglitazone 30mg daily vs Placebo                                           | 1                 | 0.87                          | 1.65             | [1.00; 2.72]   | 1.75            | [1.02; 2.99]   | 1.10              | [0.27; 4.47]       | 1.59       | [0.35; 7.11]     | 0.55    |
| Pioglitazone 30mg daily vs Vitamin E 800 IU daily                            | 1                 | 0.98                          | 0.80             | [0.54; 1.18]   | 0.79            | [0.53; 1.17]   | 1.74              | [0.14; 21.97]      | 0.45       | [0.03; 5.91]     | 0.55    |
| Vitamin E 800 IU daily and Pioglitazone 45mg daily vs Placebo                | 1                 | 0.56                          | 3.38             | [1.88; 6.07]   | 2.88            | [1.32; 6.29]   | 4.15              | [1.71; 10.05]      | 0.70       | [0.21; 2.26]     | 0.55    |
| Vitamin E 800 IU daily vs Vitamin E 800 IU daily and Pioglitazone 45mg daily | 1                 | 0.83                          | 0.61             | [0.36; 1.03]   | 0.57            | [0.32; 1.00]   | 0.86              | [0.25; 3.01]       | 0.65       | [0.17; 2.59]     | 0.55    |
| <b>NASH resolution without worsening fibrosis</b>                            |                   |                               |                  |                |                 |                |                   |                    |            |                  |         |
| Treatment Comparison                                                         | Number of studies | Proportion of direct evidence | Network Estimate | 95% CI         | Direct Estimate | 95% CI         | Indirect Estimate | 95% CI             | RoR        | 95% CI           | p-value |
| Obeticholic acid 10mg daily vs Obeticholic acid 25mg daily                   | 1                 | 0.93                          | 0.94             | [0.62; 1.44]   | 0.96            | [0.62; 1.49]   | 0.76              | [0.16; 3.61]       | 1.26       | [0.25; 6.30]     | 0.78    |
| Obeticholic acid 10mg daily vs Placebo                                       | 1                 | 0.87                          | 1.43             | [0.91; 2.26]   | 1.40            | [0.86; 2.27]   | 1.69              | [0.48; 5.87]       | 0.83       | [0.22; 3.16]     | 0.78    |
| Pioglitazone 30mg daily vs Placebo                                           | 1                 | 0.89                          | 2.46             | [1.56; 3.88]   | 2.32            | [1.43; 3.76]   | 4.02              | [0.99; 16.39]      | 0.58       | [0.13; 2.55]     | 0.47    |
| Pioglitazone 30mg daily vs Vitamin E 800 IU daily                            | 1                 | 0.96                          | 1.30             | [0.90; 1.86]   | 1.33            | [0.92; 1.92]   | 0.66              | [0.10; 4.21]       | 2.01       | [0.30; 13.27]    | 0.47    |
| Selonsertib 6mg daily vs Placebo                                             | 2                 | 0.99                          | 0.64             | [0.37; 1.12]   | 0.63            | [0.36; 1.10]   | 6.36              | [0.01; 3268.34]    | 0.10       | [0.00; 51.95]    | 0.47    |
| Vitamin E 800 IU daily and Pioglitazone 45mg daily vs Placebo                | 1                 | 0.45                          | 2.64             | [1.36; 5.12]   | 3.46            | [1.29; 9.29]   | 2.11              | [0.86; 5.17]       | 1.64       | [0.43; 6.21]     | 0.47    |
| Selonsertib 18mg daily vs Selonsertib 6mg daily                              | 2                 | 0.99                          | 0.88             | [0.51; 1.51]   | 0.89            | [0.52; 1.54]   | 0.11              | [0.00; 77.57]      | 8.33       | [0.01; 6181.86]  | 0.53    |
| Vitamin E 800 IU daily vs Vitamin E 800 IU daily and Pioglitazone 45mg daily | 1                 | 0.90                          | 0.72             | [0.41; 1.26]   | 0.77            | [0.43; 1.39]   | 0.38              | [0.06; 2.29]       | 2.01       | [0.31; 13.14]    | 0.47    |
| <b>Fibrosis improvement without worsening NASH</b>                           |                   |                               |                  |                |                 |                |                   |                    |            |                  |         |
| Treatment Comparison                                                         | Number of studies | Proportion of direct evidence | Network Estimate | 95% CI         | Direct Estimate | 95% CI         | Indirect Estimate | 95% CI             | RoR        | 95% CI           | p-value |
| Selonsertib 18mg daily vs Placebo                                            | 2                 | 0.99                          | 0.94             | [0.66; 1.33]   | 0.93            | [0.66; 1.31]   | 4.87              | [0.05; 448.17]     | 0.19       | [0; 17.79]       | 0.47    |
| Selonsertib 18mg daily vs Selonsertib 6mg daily                              | 2                 | 1.00                          | 0.98             | [0.73; 1.30]   | 0.97            | [0.73; 1.30]   | 12.34             | [0.02; 6917.14]    | 0.08       | [0; 44.48]       | 0.43    |
| <b>Fibrosis improvement regardless of NASH progression</b>                   |                   |                               |                  |                |                 |                |                   |                    |            |                  |         |
| Treatment Comparison                                                         | Number of studies | Proportion of direct evidence | Network Estimate | 95% CI         | Direct Estimate | 95% CI         | Indirect Estimate | 95% CI             | RoR        | 95% CI           | p-value |
| Obeticholic acid 10mg daily vs Obeticholic acid 25mg daily                   | 1                 | 0.96                          | 0.72             | [0.55; 0.95]   | 0.73            | [0.56; 0.96]   | 0.56              | [0.14; 2.28]       | 1.30       | [0.31; 5.41]     | 0.72    |
| Obeticholic acid 10mg daily vs Placebo                                       | 1                 | 0.90                          | 1.22             | [0.90; 1.66]   | 1.20            | [0.87; 1.65]   | 1.44              | [0.56; 3.73]       | 0.83       | [0.31; 2.26]     | 0.72    |
| Selonsertib 18mg daily vs Placebo                                            | 2                 | 0.99                          | 0.99             | [0.73; 1.34]   | 0.99            | [0.73; 1.34]   | 1.41              | [0.03; 67.80]      | 0.70       | [0.01; 34.40]    | 0.86    |
| Selonsertib 6mg daily vs Placebo                                             | 2                 | 1.00                          | 0.95             | [0.70; 1.28]   | 0.96            | [0.70; 1.30]   | 0.02              | [0.00; 14.40]      | 60.45      | [0.07; 55453.59] | 0.24    |
| Selonsertib 18mg daily vs Selonsertib 6mg daily                              | 2                 | 1.00                          | 1.05             | [0.82; 1.34]   | 1.04            | [0.82; 1.34]   | 354.37            | [0.03; 4572777.90] | 0.00       | [0.00; 38.16]    | 0.23    |
| <b>Mean change in NAS</b>                                                    |                   |                               |                  |                |                 |                |                   |                    |            |                  |         |
| Treatment Comparison                                                         | Number of studies | Proportion of direct evidence | Network Estimate | 95% CI         | Direct Estimate | 95% CI         | Indirect Estimate | 95% CI             | Difference | 95% CI           | p-value |
| Pioglitazone 30mg daily vs Placebo                                           | 1                 | 0.92                          | -1.18            | [-2.12; -0.23] | -1.40           | [-2.38; -0.42] | 1.33              | [-1.96; 4.61]      | -2.73      | [-6.16; 0.71]    | 0.12    |

|                                                   |   |      |       |                |       |                |       |                |       |               |      |
|---------------------------------------------------|---|------|-------|----------------|-------|----------------|-------|----------------|-------|---------------|------|
| Pioglitazone 30mg daily vs Vitamin E 800 IU daily | 1 | 0.92 | -0.22 | [-1.16; 0.72]  | 0.00  | [-0.98; 0.98]  | -2.76 | [-6.09; 0.57]  | 2.76  | [-0.71; 6.23] | 0.12 |
| Telmisartan 40mg daily vs Placebo                 | 1 | 0.67 | -1.50 | [-2.30; -0.70] | -1.05 | [-2.03; -0.07] | -2.40 | [-3.79; -1.01] | 1.35  | [-0.35; 3.05] | 0.12 |
| Vitamin E 800 IU daily vs Placebo                 | 1 | 0.67 | -0.96 | [-1.76; -0.16] | -1.40 | [-2.37; -0.43] | -0.05 | [-1.44; 1.34]  | -1.35 | [-3.05; 0.35] | 0.12 |
| Telmisartan 40mg daily vs Vitamin E 800 IU daily  | 1 | 0.66 | -0.54 | [-1.34; 0.27]  | -1.00 | [-1.99; -0.01] | 0.35  | [-1.03; 1.73]  | -1.35 | [-3.05; 0.35] | 0.12 |

#### Mean change in steatosis

| Treatment Comparison                                                         | Number of studies | Proportion of direct evidence | Network Estimate | 95% CI         | Direct Estimate | 95% CI         | Indirect Estimate | 95% CI        | Difference | 95% CI        | p-value |
|------------------------------------------------------------------------------|-------------------|-------------------------------|------------------|----------------|-----------------|----------------|-------------------|---------------|------------|---------------|---------|
| Pentoxifylline 400mg TID vs Pioglitazone 30mg daily                          | 1                 | 0.19                          | 0.26             | [-0.33; 0.85]  | 0.35            | [-1.01; 1.71]  | 0.24              | [-0.42; 0.90] | 0.11       | [-1.40; 1.62] | 0.89    |
| Pentoxifylline 400mg TID vs Placebo                                          | 2                 | 0.94                          | -0.45            | [-0.81; -0.09] | -0.46           | [-0.83; -0.09] | -0.35             | [-1.82; 1.12] | -0.11      | [-1.62; 1.40] | 0.89    |
| Pioglitazone 30mg daily vs Placebo                                           | 1                 | 0.78                          | -0.71            | [-1.22; -0.21] | -0.70           | [-1.27; -0.13] | -0.76             | [-1.84; 0.32] | 0.06       | [-1.16; 1.29] | 0.92    |
| Pioglitazone 30mg daily vs Vitamin E 800 IU daily                            | 1                 | 0.84                          | -0.11            | [-0.63; 0.41]  | -0.10           | [-0.67; 0.47]  | -0.16             | [-1.48; 1.15] | 0.06       | [-1.37; 1.50] | 0.93    |
| Vitamin E 800 IU daily vs Placebo                                            | 2                 | 0.98                          | -0.60            | [-1.01; -0.20] | -0.60           | [-1.01; -0.19] | -0.81             | [-3.75; 2.12] | 0.21       | [-2.75; 3.18] | 0.89    |
| Vitamin E 800 IU daily and Pioglitazone 45mg daily vs Placebo                | 1                 | 0.86                          | -0.90            | [-1.48; -0.33] | -0.90           | [-1.52; -0.28] | -0.91             | [-2.47; 0.64] | 0.01       | [-1.66; 1.69] | 0.99    |
| Vitamin E 800 IU daily vs Vitamin E 800 IU daily and Pioglitazone 45mg daily | 1                 | 0.85                          | 0.30             | [-0.28; 0.88]  | 0.30            | [-0.33; 0.93]  | 0.29              | [-1.23; 1.80] | 0.01       | [-1.62; 1.65] | 0.99    |

#### Mean change in lobular inflammation

| Treatment Comparison                                                         | Number of studies | Proportion of direct evidence | Network Estimate | 95% CI         | Direct Estimate | 95% CI         | Indirect Estimate | 95% CI        | Difference | 95% CI        | p-value |
|------------------------------------------------------------------------------|-------------------|-------------------------------|------------------|----------------|-----------------|----------------|-------------------|---------------|------------|---------------|---------|
| Pentoxifylline 400mg TID vs Pioglitazone 30mg daily                          | 1                 | 0.29                          | 0.15             | [-0.30; 0.60]  | 0.50            | [-0.34; 1.34]  | 0.01              | [-0.53; 0.55] | 0.49       | [-0.51; 1.49] | 0.33    |
| Pentoxifylline 400mg TID vs Placebo                                          | 2                 | 0.89                          | -0.39            | [-0.71; -0.08] | -0.45           | [-0.78; -0.11] | 0.05              | [-0.90; 0.99] | -0.49      | [-1.49; 0.51] | 0.33    |
| Pioglitazone 30mg daily vs Placebo                                           | 1                 | 0.73                          | -0.54            | [-0.93; -0.16] | -0.50           | [-0.95; -0.05] | -0.66             | [-1.39; 0.08] | 0.16       | [-0.70; 1.02] | 0.72    |
| Pioglitazone 30mg daily vs Vitamin E 800 IU daily                            | 1                 | 0.81                          | -0.21            | [-0.61; 0.20]  | -0.10           | [-0.55; 0.35]  | -0.67             | [-1.60; 0.27] | 0.57       | [-0.47; 1.60] | 0.28    |
| Vitamin E 800 IU daily vs Placebo                                            | 2                 | 0.97                          | -0.34            | [-0.66; -0.01] | -0.31           | [-0.64; 0.02]  | -1.29             | [-3.24; 0.67] | 0.98       | [-1.00; 2.96] | 0.33    |
| Vitamin E 800 IU daily and Pioglitazone 45mg daily vs Placebo                | 1                 | 0.83                          | -0.48            | [-0.92; -0.03] | -0.40           | [-0.89; 0.09]  | -0.84             | [-1.92; 0.24] | 0.44       | [-0.75; 1.63] | 0.47    |
| Vitamin E 800 IU daily vs Vitamin E 800 IU daily and Pioglitazone 45mg daily | 1                 | 0.87                          | 0.14             | [-0.30; 0.58]  | 0.20            | [-0.27; 0.67]  | -0.28             | [-1.51; 0.94] | 0.48       | [-0.82; 1.79] | 0.47    |

#### Mean change in hepatocellular ballooning

| Treatment Comparison                                                         | Number of studies | Proportion of direct evidence | Network Estimate | 95% CI         | Direct Estimate | 95% CI         | Indirect Estimate | 95% CI        | Difference | 95% CI        | p-value |
|------------------------------------------------------------------------------|-------------------|-------------------------------|------------------|----------------|-----------------|----------------|-------------------|---------------|------------|---------------|---------|
| Pentoxifylline 400mg TID vs Pioglitazone 30mg daily                          | 1                 | 0.25                          | -0.08            | [-0.39; 0.23]  | 0.19            | [-0.43; 0.81]  | -0.16             | [-0.52; 0.19] | 0.35       | [-0.36; 1.07] | 0.33    |
| Pentoxifylline 400mg TID vs Placebo                                          | 2                 | 0.89                          | -0.34            | [-0.56; -0.11] | -0.38           | [-0.61; -0.14] | -0.02             | [-0.69; 0.65] | -0.35      | [-1.07; 0.36] | 0.33    |
| Pioglitazone 30mg daily vs Placebo                                           | 1                 | 0.81                          | -0.26            | [-0.51; -0.01] | -0.20           | [-0.47; 0.07]  | -0.52             | [-1.09; 0.05] | 0.32       | [-0.31; 0.96] | 0.32    |
| Pioglitazone 30mg daily vs Vitamin E 800 IU daily                            | 1                 | 0.85                          | 0.09             | [-0.20; 0.38]  | 0.10            | [-0.21; 0.41]  | 0.01              | [-0.73; 0.76] | 0.09       | [-0.72; 0.89] | 0.83    |
| Vitamin E 800 IU daily vs Placebo                                            | 2                 | 0.98                          | -0.35            | [-0.61; -0.09] | -0.33           | [-0.59; -0.07] | -1.25             | [-3.09; 0.59] | 0.92       | [-0.93; 2.78] | 0.33    |
| Vitamin E 800 IU daily and Pioglitazone 45mg daily vs Placebo                | 1                 | 0.80                          | -0.47            | [-0.91; -0.04] | -0.50           | [-0.98; -0.02] | -0.36             | [-1.34; 0.62] | -0.14      | [-1.23; 0.95] | 0.80    |
| Vitamin E 800 IU daily vs Vitamin E 800 IU daily and Pioglitazone 45mg daily | 1                 | 0.83                          | 0.12             | [-0.31; 0.55]  | 0.10            | [-0.37; 0.57]  | 0.24              | [-0.79; 1.28] | -0.14      | [-1.28; 0.99] | 0.80    |

#### Mean change in fibrosis

| Treatment Comparison                                | Number of studies | Proportion of direct evidence | Network Estimate | 95% CI         | Direct Estimate | 95% CI         | Indirect Estimate | 95% CI         | Difference | 95% CI        | p-value |
|-----------------------------------------------------|-------------------|-------------------------------|------------------|----------------|-----------------|----------------|-------------------|----------------|------------|---------------|---------|
| Pentoxifylline 400mg TID vs Pioglitazone 30mg daily | 1                 | 0.18                          | -0.10            | [-0.50; 0.31]  | 0.54            | [-0.41; 1.49]  | -0.24             | [-0.68; 0.21]  | 0.78       | [-0.27; 1.82] | 0.15    |
| Pentoxifylline 400mg TID vs Placebo                 | 2                 | 0.94                          | -0.56            | [-0.80; -0.32] | -0.60           | [-0.85; -0.35] | 0.18              | [-0.84; 1.19]  | -0.78      | [-1.82; 0.27] | 0.15    |
| Pioglitazone 30mg daily vs Placebo                  | 1                 | 0.80                          | -0.46            | [-0.81; -0.11] | -0.30           | [-0.69; 0.09]  | -1.08             | [-1.85; -0.32] | 0.78       | [-0.08; 1.64] | 0.07    |
| Pioglitazone 30mg daily vs Vitamin E 800 IU daily   | 1                 | 0.86                          | -0.11            | [-0.46; 0.24]  | -0.10           | [-0.48; 0.28]  | -0.18             | [-1.13; 0.78]  | 0.08       | [-0.95; 1.10] | 0.89    |

|                                                                              |   |      |       |                |       |                |       |                |       |               |      |
|------------------------------------------------------------------------------|---|------|-------|----------------|-------|----------------|-------|----------------|-------|---------------|------|
| Telmisartan 40mg daily vs Placebo                                            | 1 | 0.59 | -0.67 | [-1.08; -0.25] | -0.95 | [-1.49; -0.41] | -0.27 | [-0.91; 0.38]  | -0.68 | [-1.53; 0.16] | 0.11 |
| Vitamin E 800 IU daily vs Placebo                                            | 2 | 0.86 | -0.35 | [-0.63; -0.07] | -0.23 | [-0.53; 0.07]  | -1.07 | [-1.80; -0.33] | 0.84  | [ 0.04; 1.63] | 0.04 |
| Vitamin E 800 IU daily and Pioglitazone 45mg daily vs Placebo                | 1 | 0.74 | -0.33 | [-0.78; 0.12]  | -0.30 | [-0.82; 0.22]  | -0.41 | [-1.29; 0.47]  | 0.11  | [-0.92; 1.13] | 0.83 |
| Telmisartan 40mg daily vs Vitamin E 800 IU daily                             | 1 | 0.53 | -0.32 | [-0.74; 0.10]  | 0.00  | [-0.58; 0.58]  | -0.68 | [-1.30; -0.07] | 0.68  | [-0.16; 1.53] | 0.11 |
| Vitamin E 800 IU daily vs Vitamin E 800 IU daily and Pioglitazone 45mg daily | 1 | 0.82 | -0.02 | [-0.46; 0.41]  | 0.00  | [-0.48; 0.48]  | -0.12 | [-1.16; 0.92]  | 0.12  | [-1.02; 1.27] | 0.83 |

## Appendix 11: Comparison-adjusted funnel plots for each network

e-Figure 37:  $\geq 2$ -point decrease in NAFLD Activity Score [NAS]

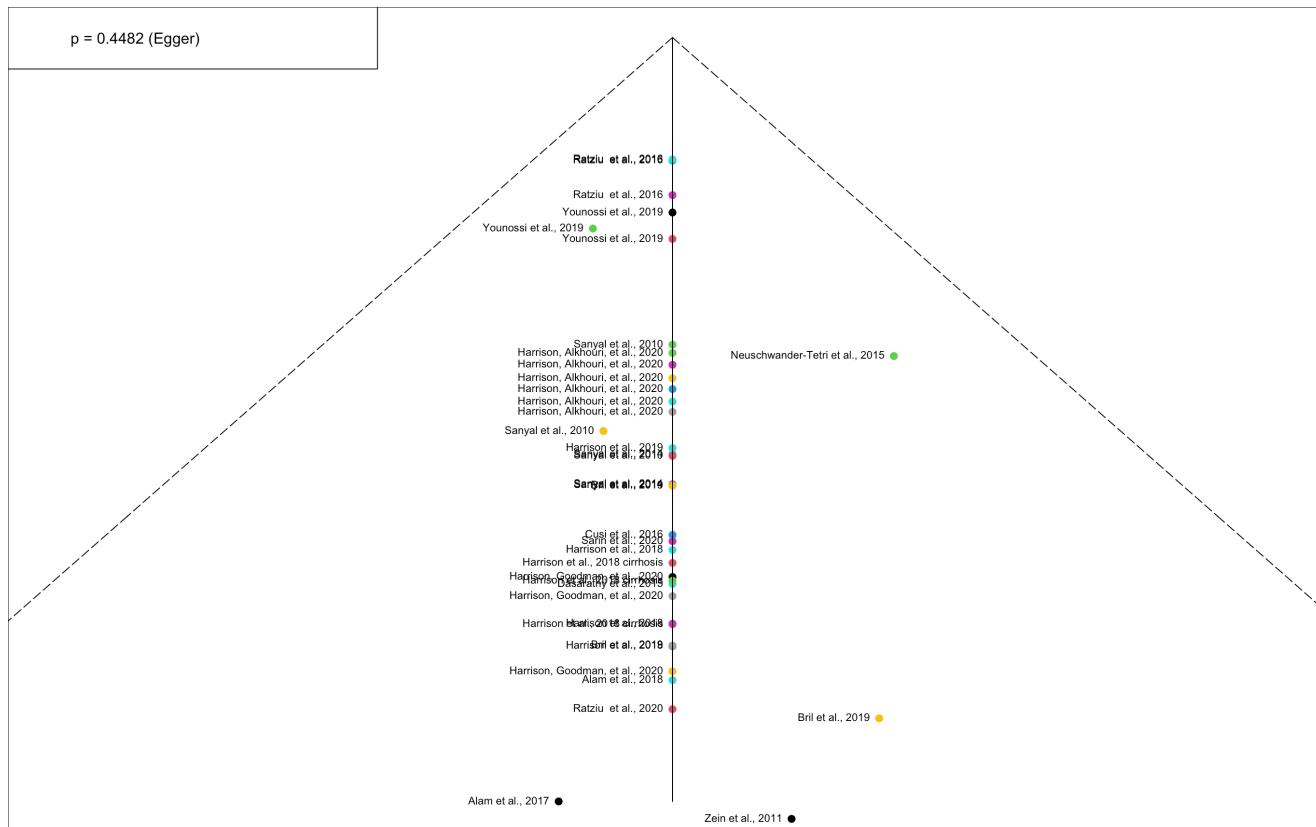

Comparison-adjusted funnel plot categorizing the network of studies analyzing the presence of  $\geq 2$ -point decrease in NAFLD Activity Score [NAS]. Funnel plot asymmetry was evaluated across the plot of standard error versus the comparison-specific treatment effect, which is relative risk [RR] for dichotomous variables and mean difference [MD] for continuous variables. The Egger test was performed in order to statistically assess the presence of small study effects.

e-Figure 38: NASH resolution without worsening fibrosis

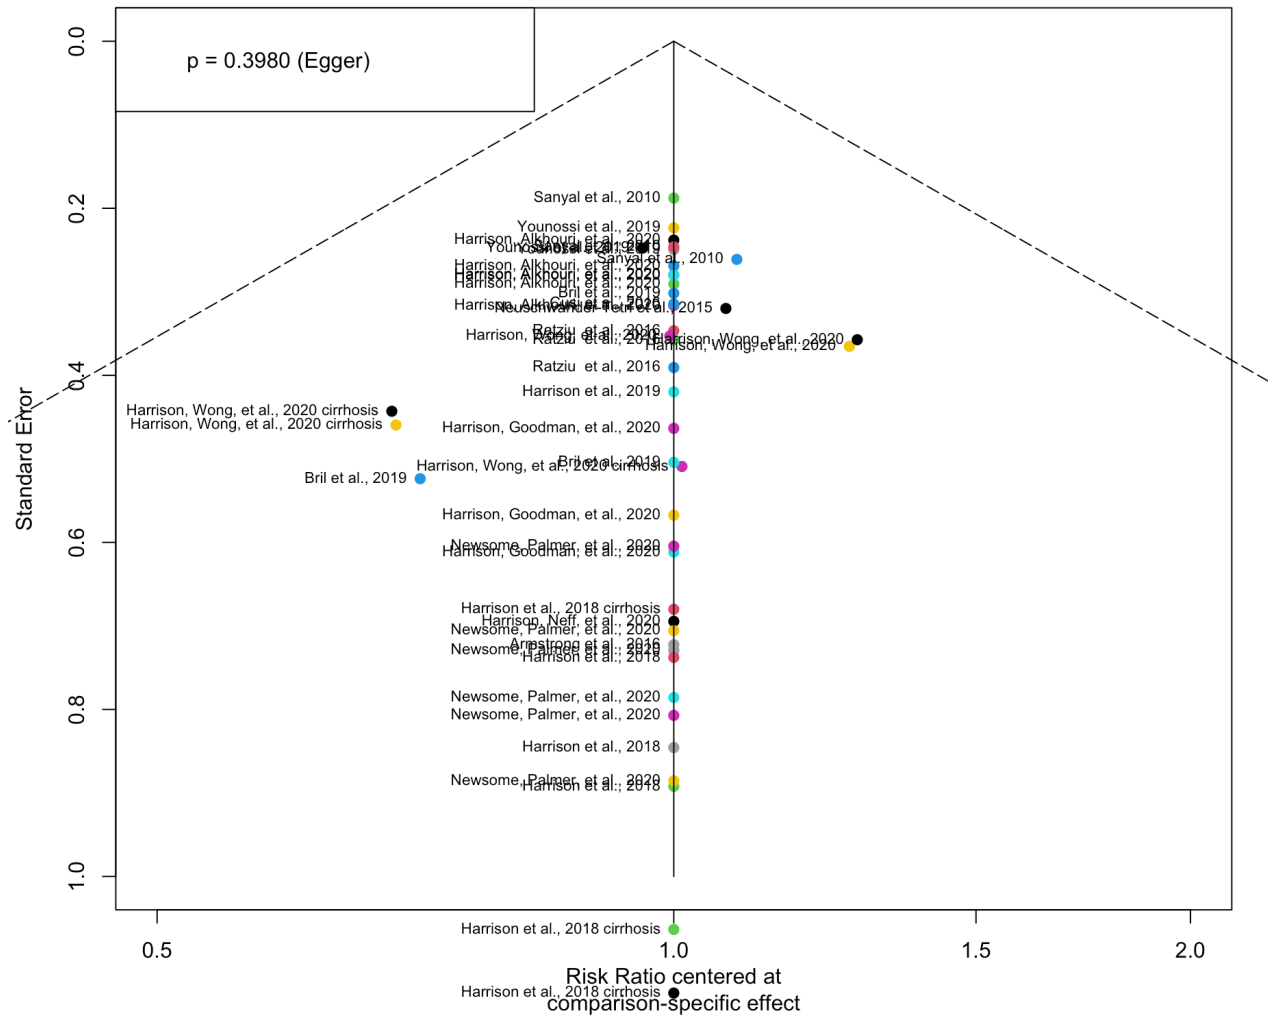

Comparison-adjusted funnel plot categorizing the network of studies analyzing the presence of NASH resolution without worsening fibrosis. Funnel plot asymmetry was evaluated across the plot of standard error versus the comparison-specific treatment effect, which is relative risk [RR] for dichotomous variables and mean difference [MD] for continuous variables. The Egger test was performed in order to statistically assess the presence of small study effects.



e-Figure 39: Fibrosis improvement without worsening NASH

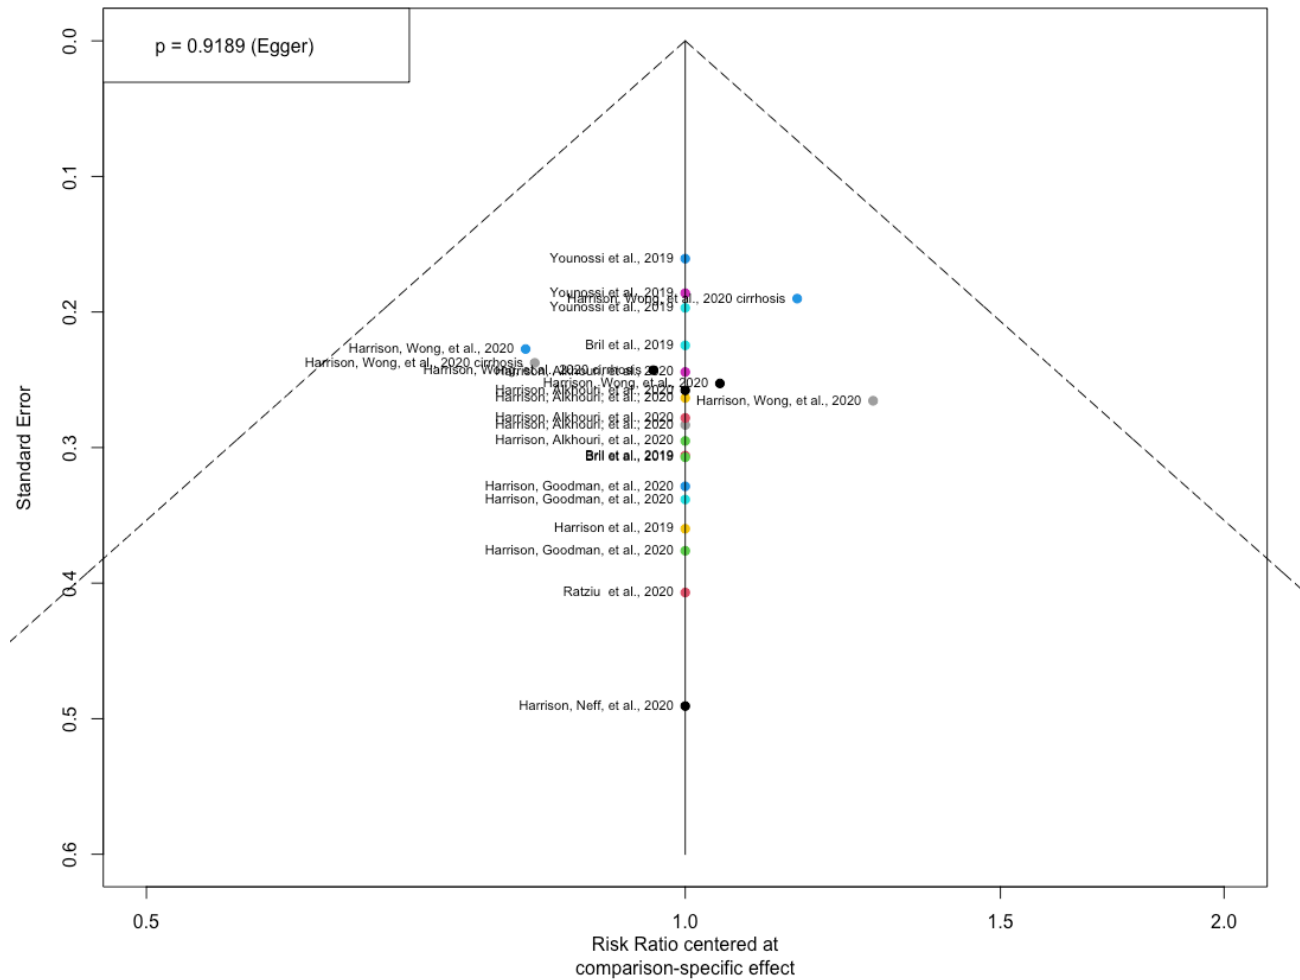

Comparison-adjusted funnel plot categorizing the network of studies analyzing the presence of fibrosis improvement without worsening NASH. Funnel plot asymmetry was evaluated across the plot of standard error versus the comparison-specific treatment effect, which is relative risk [RR] for dichotomous variables and mean difference [MD] for continuous variables. The Egger test was performed in order to statistically assess the presence of small study effects.

e-Figure 40: Fibrosis improvement regardless of NASH progression

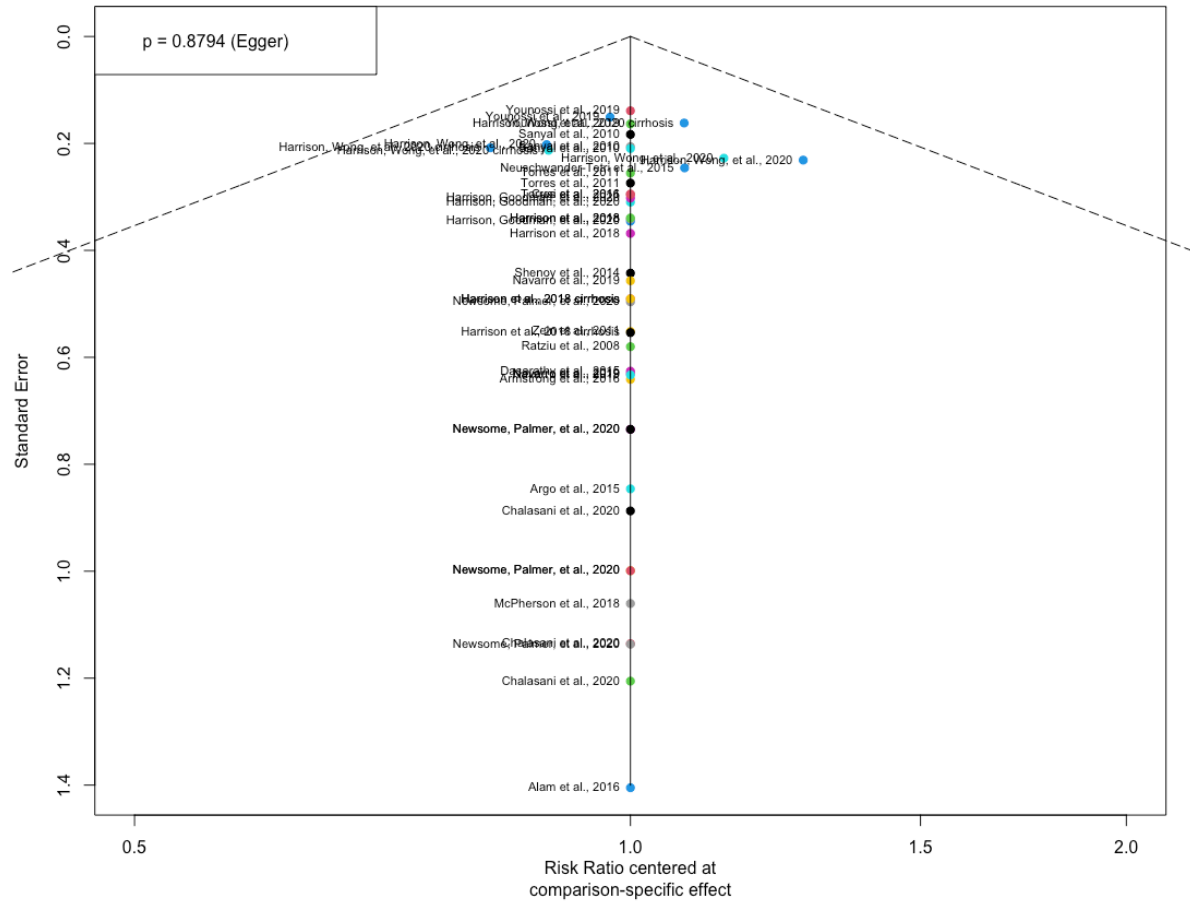

Comparison-adjusted funnel plot categorizing the network of studies analyzing the presence of fibrosis improvement regardless of NASH progression. Funnel plot asymmetry was evaluated across the plot of standard error versus the comparison-specific treatment effect, which is relative risk [RR] for dichotomous variables and mean difference [MD] for continuous variables. The Egger test was performed in order to statistically assess the presence of small study effects.

e-Figure 41: Mean change in NAFLD Activity Score [NAS]

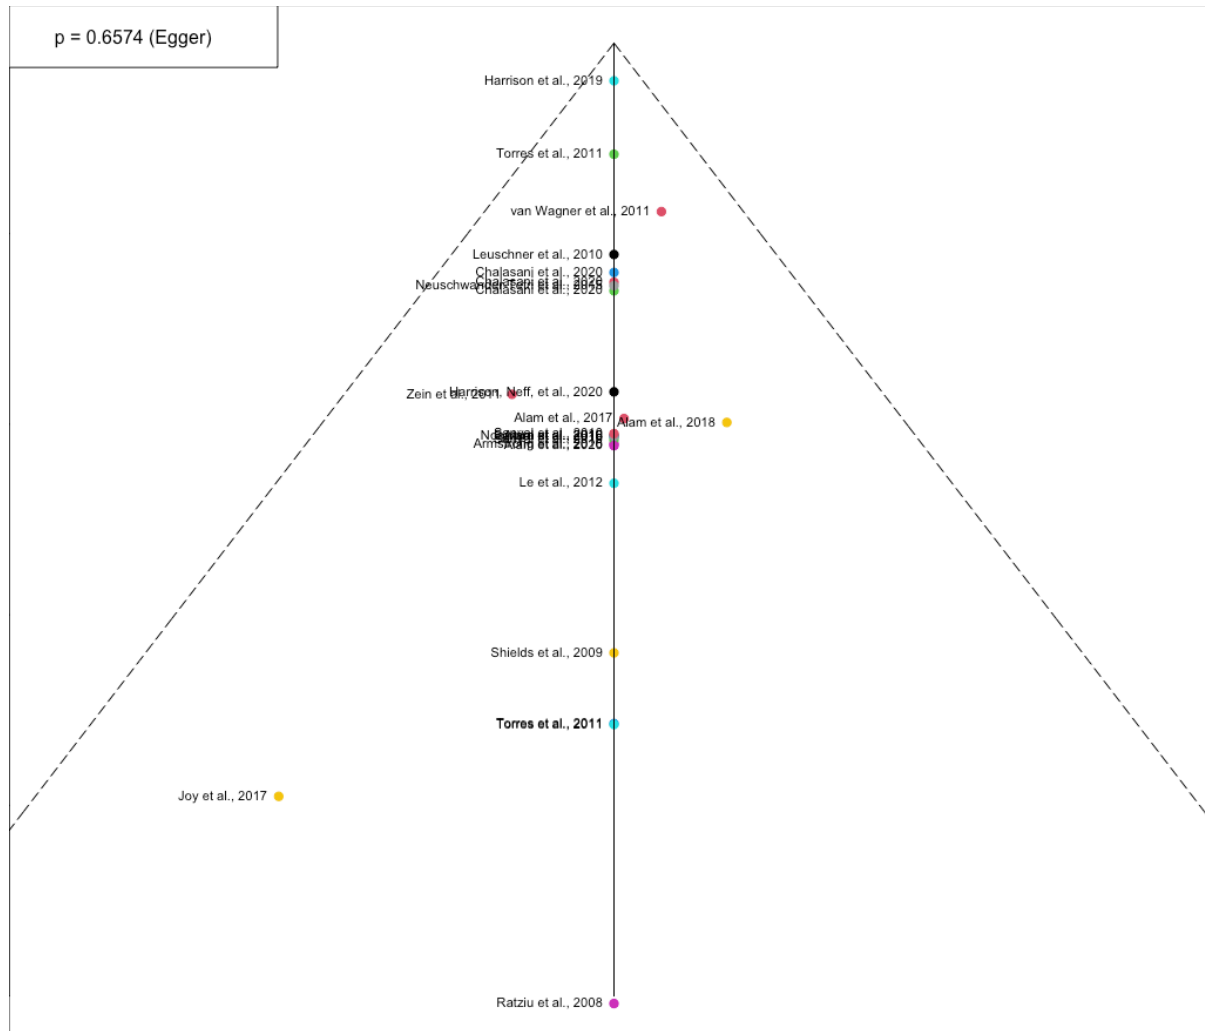

Comparison-adjusted funnel plot categorizing the network of studies analyzing the mean change in NAFLD activity score [NAS] compared from baseline to end of treatment. Funnel plot asymmetry was evaluated across the plot of standard error versus the comparison-specific treatment effect, which is relative risk [RR] for dichotomous variables and mean difference [MD] for continuous variables. The Egger test was performed in order to statistically assess the presence of small study effects.

e-Figure 42: Mean change in steatosis

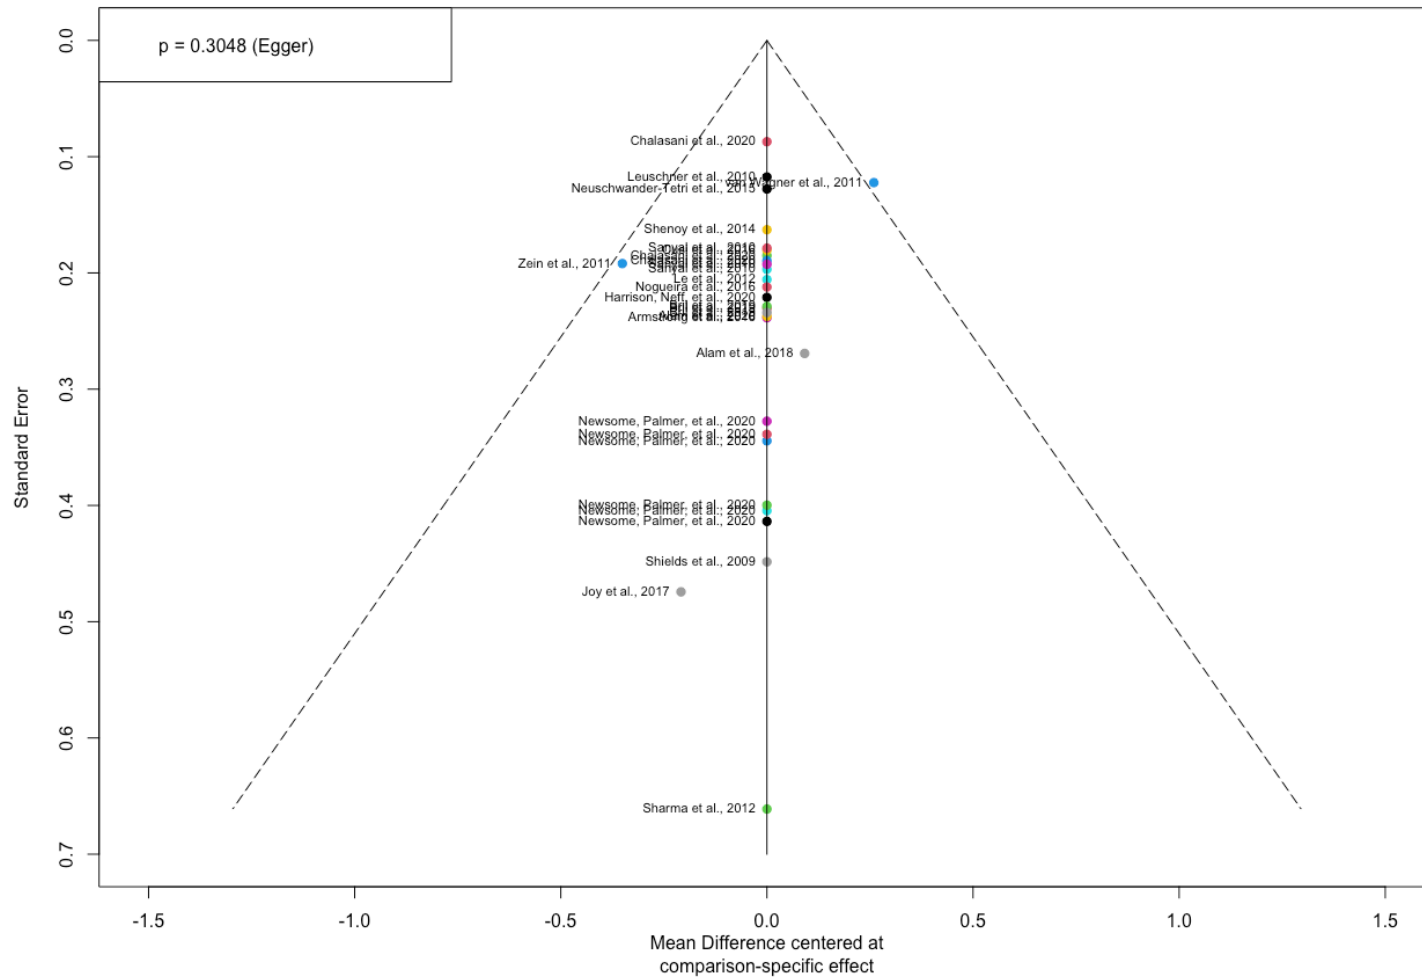

Comparison-adjusted funnel plot categorizing the network of studies analyzing the mean change in steatosis score compared from baseline to end of treatment. Funnel plot asymmetry was evaluated across the plot of standard error versus the comparison-specific treatment effect, which is relative risk [RR] for dichotomous variables and mean difference [MD] for continuous variables. The Egger test was performed in order to statistically assess the presence of small study effects.

e-Figure 43: Mean change in lobular inflammation

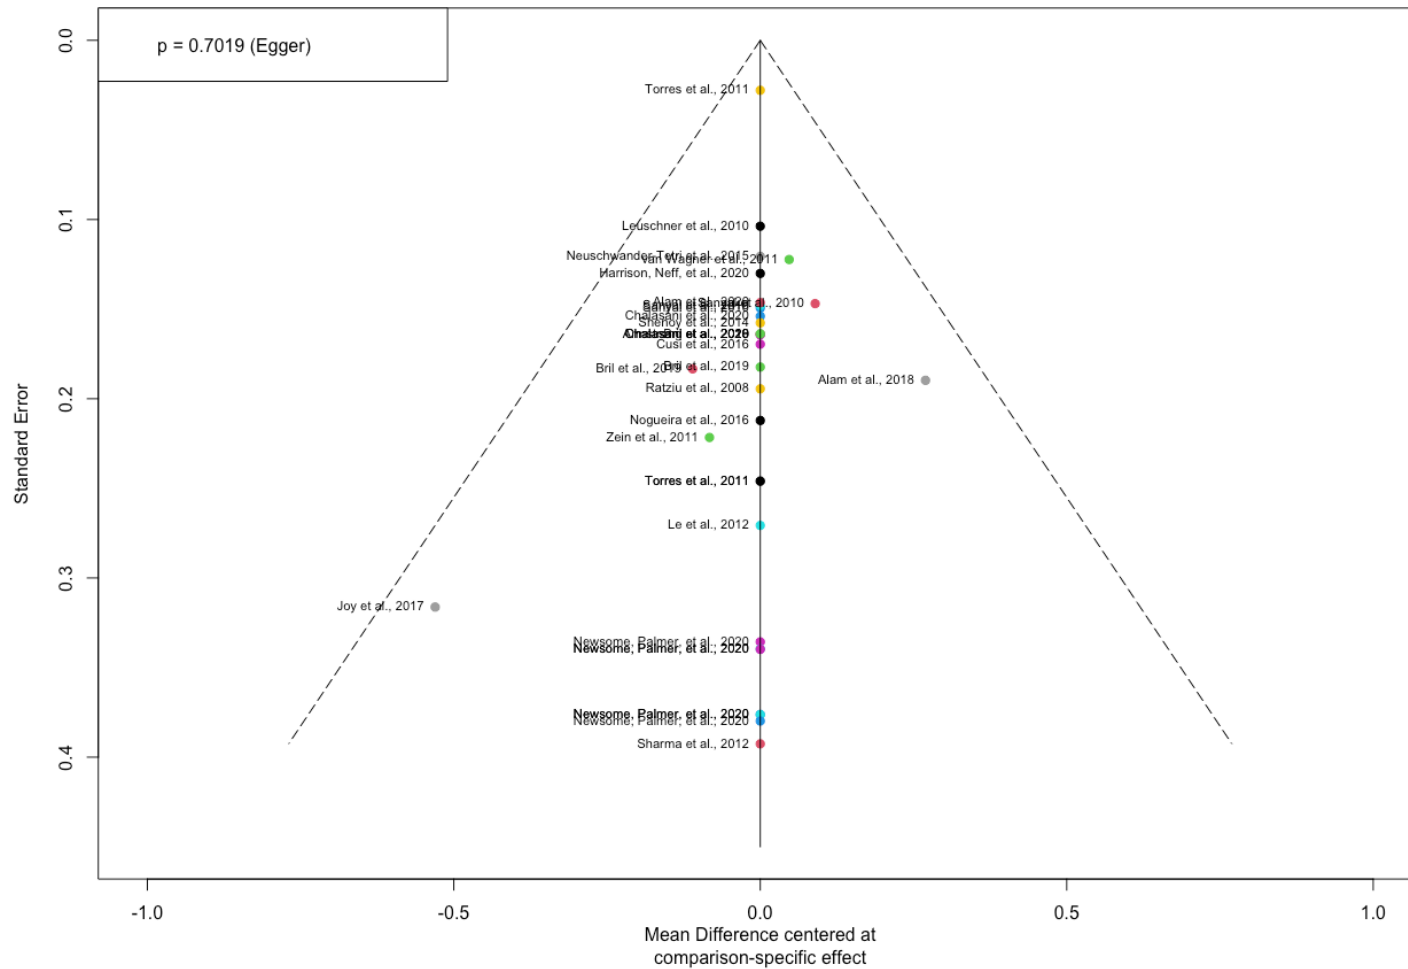

Comparison-adjusted funnel plot categorizing the network of studies analyzing the mean change in lobular inflammation score compared from baseline to end of treatment. Funnel plot asymmetry was evaluated across the plot of standard error versus the comparison-specific treatment effect, which is relative risk [RR] for dichotomous variables and mean difference [MD] for continuous variables. The Egger test was performed in order to statistically assess the presence of small study effects.

e-Figure 44: Mean change in hepatocellular ballooning

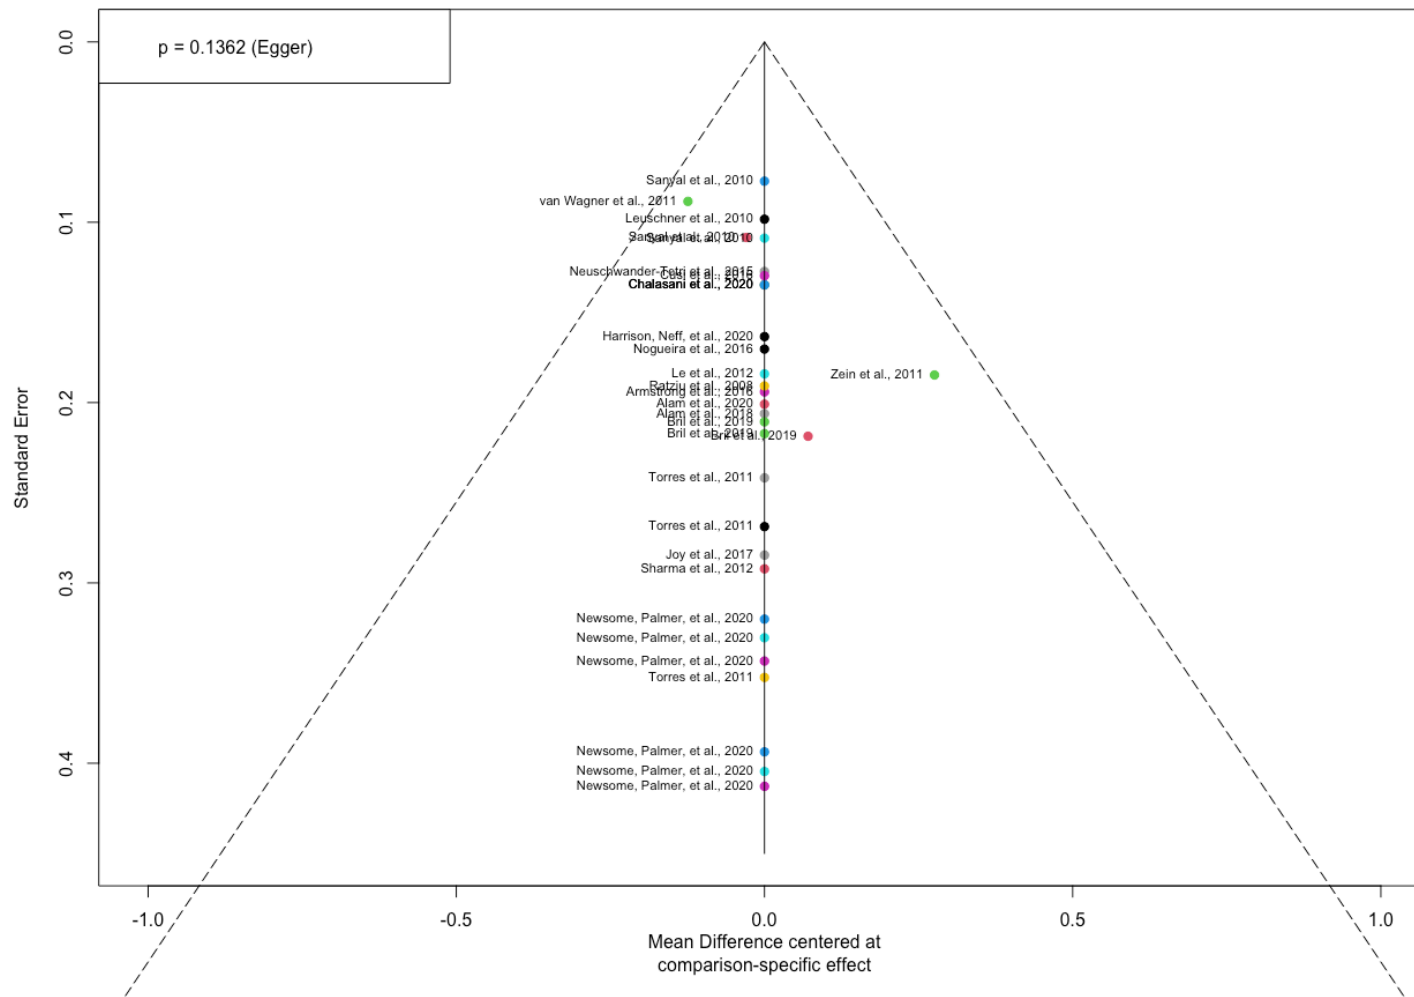

Comparison-adjusted funnel plot categorizing the network of studies analyzing the mean change in hepatocellular ballooning score compared from baseline to end of treatment. Funnel plot asymmetry was evaluated across the plot of standard error versus the comparison-specific treatment effect, which is relative risk [RR] for dichotomous variables and mean difference [MD] for continuous variables. The Egger test was performed in order to statistically assess the presence of small study effects.

e-Figure 45: Mean change in fibrosis

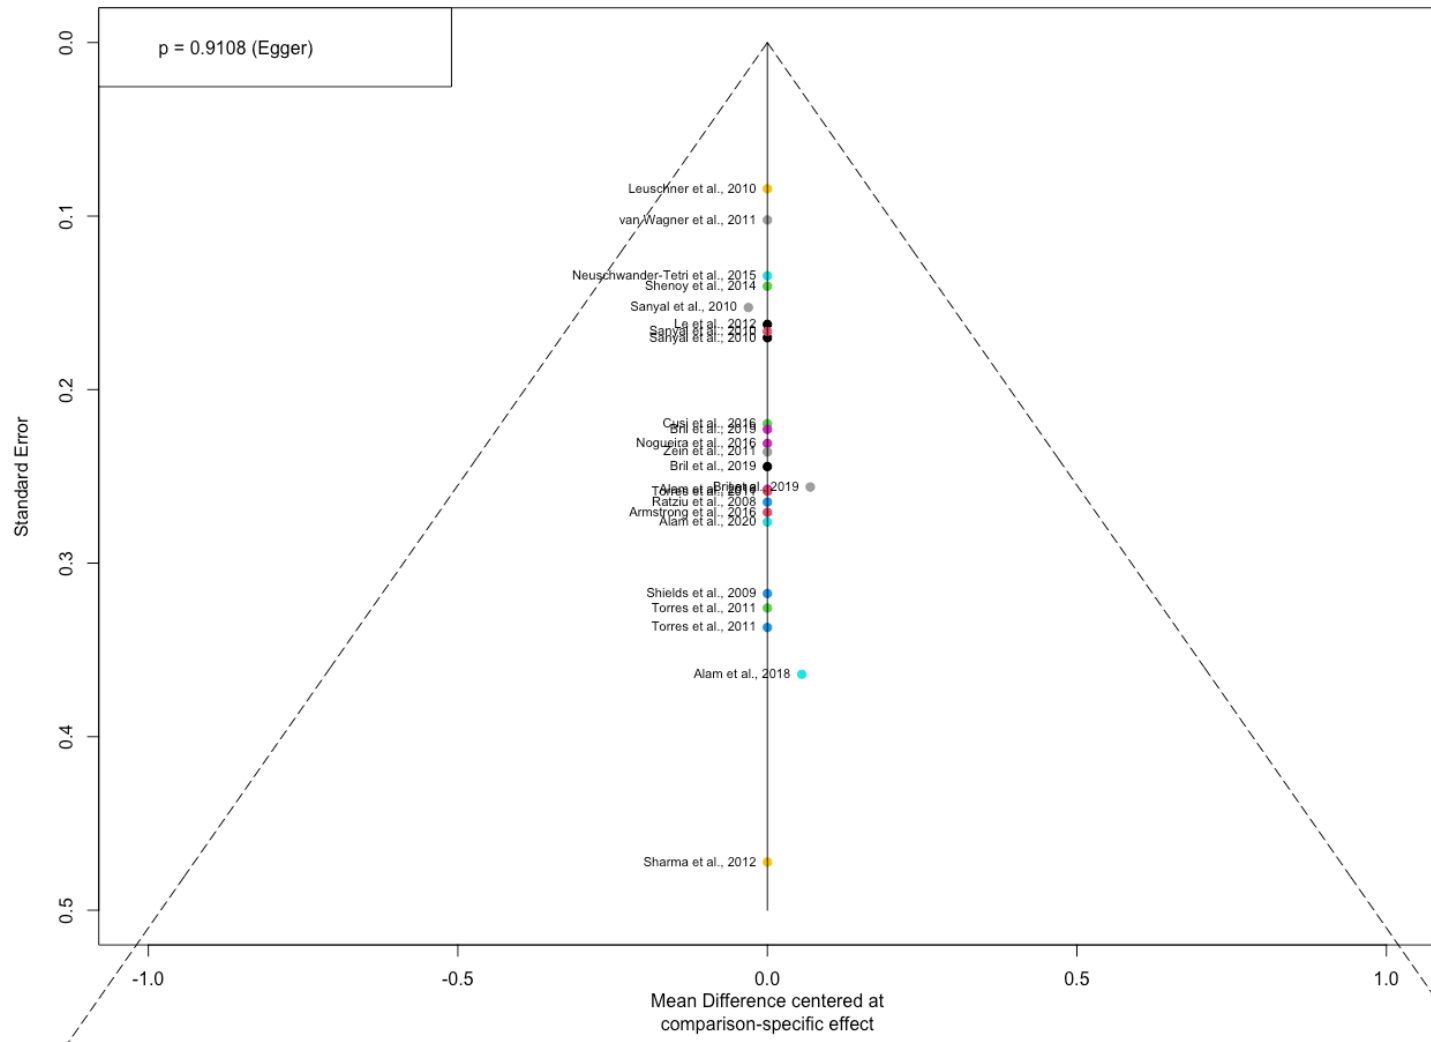

Comparison-adjusted funnel plot categorizing the network of studies analyzing the mean change in fibrosis score compared from baseline to end of treatment. Funnel plot asymmetry was evaluated across the plot of standard error versus the comparison-specific treatment effect, which is relative risk [RR] for dichotomous variables and mean difference [MD] for continuous variables. The Egger test was performed in order to statistically assess the presence of small study effects.

## Appendix 12: GRADE assessments and summary of evidence

| <u>≥ 2-point decrease in NAFLD Activity Score [NAS]</u>    |                   |                   |                |              |                |                |             |                   |
|------------------------------------------------------------|-------------------|-------------------|----------------|--------------|----------------|----------------|-------------|-------------------|
| Comparison                                                 | Number of studies | Within-study bias | Reporting bias | Indirectness | Imprecision    | Heterogeneity  | Incoherence | Confidence rating |
| Aldafermin 1mg SQ daily vs Placebo                         | 1                 | No concerns       | Undetected     | No concerns  | No concerns    | Major concerns | No concerns | High quality      |
| Cenicriviroc 150mg daily vs Placebo                        | 1                 | Some concerns     | Undetected     | No concerns  | Major concerns | No concerns    | No concerns | Moderate quality  |
| Colesevelam 3.75g daily vs Placebo                         | 1                 | No concerns       | Undetected     | No concerns  | Major concerns | No concerns    | No concerns | High quality      |
| Elafibranor 120 mg daily vs Elafibranor 80 mg daily        | 1                 | No concerns       | Suspected      | No concerns  | No concerns    | Major concerns | No concerns | Low quality       |
| Elafibranor 120 mg daily vs Placebo                        | 1                 | No concerns       | Suspected      | No concerns  | No concerns    | Major concerns | No concerns | Low quality       |
| Elafibranor 80 mg daily vs Placebo                         | 1                 | No concerns       | Suspected      | No concerns  | Major concerns | No concerns    | No concerns | Low quality       |
| Emricasan 50mg BID vs Emricasan 5mg BID                    | 1                 | No concerns       | Undetected     | No concerns  | Major concerns | No concerns    | No concerns | High quality      |
| Emricasan 50mg BID vs Placebo                              | 1                 | No concerns       | Undetected     | No concerns  | Major concerns | No concerns    | No concerns | High quality      |
| Emricasan 5mg BID vs Placebo                               | 1                 | No concerns       | Undetected     | No concerns  | Major concerns | No concerns    | No concerns | High quality      |
| Ezetimibe 10mg daily vs Placebo                            | 1                 | No concerns       | Suspected      | No concerns  | Major concerns | No concerns    | No concerns | Low quality       |
| MSDC0602K 125mg TID vs MSDC0602K 250mg TID                 | 1                 | No concerns       | Undetected     | No concerns  | Major concerns | No concerns    | No concerns | High quality      |
| MSDC0602K 125mg TID vs MSDC0602K 62.5mg TID                | 1                 | No concerns       | Undetected     | No concerns  | Major concerns | No concerns    | No concerns | High quality      |
| MSDC0602K 125mg TID vs Placebo                             | 1                 | No concerns       | Undetected     | No concerns  | Major concerns | No concerns    | No concerns | High quality      |
| MSDC0602K 250mg TID vs MSDC0602K 62.5mg TID                | 1                 | No concerns       | Undetected     | No concerns  | Major concerns | No concerns    | No concerns | High quality      |
| MSDC0602K 250mg TID vs Placebo                             | 1                 | No concerns       | Undetected     | No concerns  | Major concerns | No concerns    | No concerns | High quality      |
| MSDC0602K 62.5mg TID vs Placebo                            | 1                 | No concerns       | Undetected     | No concerns  | Major concerns | No concerns    | No concerns | High quality      |
| Obeticholic acid 10mg daily vs Obeticholic acid 25mg daily | 1                 | No concerns       | Undetected     | No concerns  | No concerns    | Major concerns | No concerns | High quality      |
| Obeticholic acid 10mg daily vs Placebo                     | 1                 | No concerns       | Undetected     | No concerns  | No concerns    | Major concerns | No concerns | High quality      |
| Obeticholic acid 25mg daily vs Placebo                     | 2                 | No concerns       | Undetected     | No concerns  | No concerns    | No concerns    | No concerns | High quality      |
| Pentoxifylline 400mg TID vs Placebo                        | 2                 | Some concerns     | Suspected      | No concerns  | No concerns    | Major concerns | No concerns | Low quality       |
| Pioglitazone 30mg daily vs Placebo                         | 1                 | No concerns       | Undetected     | No concerns  | Major concerns | No concerns    | No concerns | High quality      |
| Pioglitazone 30mg daily vs Vitamin E 800 IU daily          | 1                 | No concerns       | Undetected     | No concerns  | Major concerns | No concerns    | No concerns | High quality      |
| Pioglitazone 45mg daily vs Placebo                         | 1                 | No concerns       | Undetected     | No concerns  | No concerns    | Major concerns | No concerns | High quality      |
| Placebo vs Resmetirom 80mg daily                           | 1                 | No concerns       | Undetected     | No concerns  | No concerns    | Major concerns | No concerns | High quality      |
| Placebo vs Saroglitazar 4mg daily                          | 1                 | Major concerns    | Undetected     | No concerns  | No concerns    | Major concerns | No concerns | Low quality       |
| Placebo vs Silymarin 420mg                                 | 1                 | No concerns       | Suspected      | No concerns  | Major concerns | No concerns    | No concerns | Low quality       |
| Placebo vs Silymarin 700mg                                 | 1                 | No concerns       | Suspected      | No concerns  | Major concerns | No concerns    | No concerns | Low quality       |



|                                                                              |   |                |            |             |                |                |             |                  |
|------------------------------------------------------------------------------|---|----------------|------------|-------------|----------------|----------------|-------------|------------------|
| Placebo vs Simtuzumab 125mg SQ weekly                                        | 1 | Some concerns  | Suspected  | No concerns | Major concerns | No concerns    | No concerns | Low quality      |
| Placebo vs Simtuzumab 200mg IV every other week                              | 1 | Some concerns  | Suspected  | No concerns | Major concerns | No concerns    | No concerns | Low quality      |
| Placebo vs Simtuzumab 700mg IV every other week                              | 1 | Some concerns  | Suspected  | No concerns | Major concerns | No concerns    | No concerns | Low quality      |
| Placebo vs Simtuzumab 75mg SQ weekly                                         | 1 | Some concerns  | Suspected  | No concerns | Major concerns | No concerns    | No concerns | Low quality      |
| Placebo vs Sitagliptin 100mg daily                                           | 1 | Major concerns | Undetected | No concerns | No concerns    | Major concerns | No concerns | Low quality      |
| Placebo vs Telmisartan 40mg daily                                            | 1 | Major concerns | Suspected  | No concerns | Major concerns | No concerns    | No concerns | Very low quality |
| Placebo vs Vitamin E 800 IU daily                                            | 2 | No concerns    | Undetected | No concerns | No concerns    | Major concerns | No concerns | High quality     |
| Placebo vs Vitamin E 800 IU daily and Pioglitazone 45mg daily                | 1 | No concerns    | Undetected | No concerns | No concerns    | Major concerns | No concerns | High quality     |
| Placebo vs Volixibat 10mg daily                                              | 1 | No concerns    | Undetected | No concerns | Major concerns | No concerns    | No concerns | High quality     |
| Placebo vs Volixibat 20mg daily                                              | 1 | No concerns    | Undetected | No concerns | Major concerns | No concerns    | No concerns | High quality     |
| Placebo vs Volixibat 5mg daily                                               | 1 | No concerns    | Undetected | No concerns | Major concerns | No concerns    | No concerns | High quality     |
| omega 3 PUFA (EPA 1050mg) daily vs Placebo                                   | 1 | No concerns    | Undetected | No concerns | Major concerns | No concerns    | No concerns | High quality     |
| omega 3 PUFA (EPA 2160mg) daily vs Placebo                                   | 1 | No concerns    | Undetected | No concerns | Major concerns | No concerns    | No concerns | High quality     |
| omega 3 PUFA (EPA 600mg) TID vs Placebo                                      | 1 | No concerns    | Undetected | No concerns | Major concerns | No concerns    | No concerns | High quality     |
| omega 3 PUFA (EPA 900mg) TID vs Placebo                                      | 1 | No concerns    | Undetected | No concerns | Major concerns | No concerns    | No concerns | High quality     |
| Silymarin 420mg vs Silymarin 700mg                                           | 1 | No concerns    | Suspected  | No concerns | Major concerns | No concerns    | No concerns | Low quality      |
| Simtuzumab 125mg SQ weekly vs Simtuzumab 75mg SQ weekly                      | 1 | Some concerns  | Undetected | No concerns | Major concerns | No concerns    | No concerns | Moderate quality |
| Simtuzumab 200mg IV every other week vs Simtuzumab 700mg IV every other week | 1 | Some concerns  | Suspected  | No concerns | Major concerns | No concerns    | No concerns | Low quality      |
| Vitamin E 800 IU daily vs Vitamin E 800 IU daily and Pioglitazone 45mg daily | 1 | No concerns    | Undetected | No concerns | Major concerns | No concerns    | No concerns | High quality     |
| Volixibat 10mg daily vs Volixibat 20mg daily                                 | 1 | No concerns    | Undetected | No concerns | Major concerns | No concerns    | No concerns | High quality     |
| Volixibat 10mg daily vs Volixibat 5mg daily                                  | 1 | No concerns    | Undetected | No concerns | Major concerns | No concerns    | No concerns | High quality     |
| Volixibat 20mg daily vs Volixibat 5mg daily                                  | 1 | No concerns    | Undetected | No concerns | Major concerns | No concerns    | No concerns | High quality     |
| omega 3 PUFA (EPA 600mg) TID vs omega 3 PUFA (EPA 900mg) TID                 | 1 | No concerns    | Undetected | No concerns | Major concerns | No concerns    | No concerns | High quality     |
| Aldafermin 1mg SQ daily vs Cenicriviroc 150mg daily                          | 0 | Some concerns  | Undetected | No concerns | No concerns    | Major concerns | No concerns | Moderate quality |
| Aldafermin 1mg SQ daily vs Colesevelam 3.75g daily                           | 0 | No concerns    | Undetected | No concerns | Major concerns | No concerns    | No concerns | High quality     |
| Aldafermin 1mg SQ daily vs Elafibranor 120 mg daily                          | 0 | No concerns    | Undetected | No concerns | No concerns    | Major concerns | No concerns | High quality     |
| Aldafermin 1mg SQ daily vs Elafibranor 80 mg daily                           | 0 | No concerns    | Undetected | No concerns | No concerns    | Major concerns | No concerns | High quality     |
| Aldafermin 1mg SQ daily vs Emricasan 50mg BID                                | 0 | No concerns    | Undetected | No concerns | No concerns    | Major concerns | No concerns | High quality     |

|                                                                               |   |               |            |             |                |                |             |                  |
|-------------------------------------------------------------------------------|---|---------------|------------|-------------|----------------|----------------|-------------|------------------|
| Aldafermin 1mg SQ daily vs Emricasan 5mg BID                                  | 0 | No concerns   | Undetected | No concerns | No concerns    | Major concerns | No concerns | High quality     |
| Aldafermin 1mg SQ daily vs Ezetimibe 10mg daily                               | 0 | No concerns   | Undetected | No concerns | No concerns    | Major concerns | No concerns | High quality     |
| Aldafermin 1mg SQ daily vs MSDC0602K 125mg TID                                | 0 | No concerns   | Undetected | No concerns | No concerns    | Major concerns | No concerns | High quality     |
| Aldafermin 1mg SQ daily vs MSDC0602K 250mg TID                                | 0 | No concerns   | Undetected | No concerns | No concerns    | Major concerns | No concerns | High quality     |
| Aldafermin 1mg SQ daily vs MSDC0602K 62.5mg TID                               | 0 | No concerns   | Undetected | No concerns | No concerns    | Major concerns | No concerns | High quality     |
| Aldafermin 1mg SQ daily vs Obeticholic acid 10mg daily                        | 0 | No concerns   | Undetected | No concerns | No concerns    | Major concerns | No concerns | High quality     |
| Aldafermin 1mg SQ daily vs Obeticholic acid 25mg daily                        | 0 | No concerns   | Undetected | No concerns | No concerns    | Major concerns | No concerns | High quality     |
| Aldafermin 1mg SQ daily vs Pentoxifylline 400mg TID                           | 0 | Some concerns | Undetected | No concerns | Major concerns | No concerns    | No concerns | Moderate quality |
| Aldafermin 1mg SQ daily vs Pioglitazone 30mg daily                            | 0 | No concerns   | Undetected | No concerns | No concerns    | Major concerns | No concerns | High quality     |
| Aldafermin 1mg SQ daily vs Pioglitazone 45mg daily                            | 0 | No concerns   | Undetected | No concerns | Major concerns | No concerns    | No concerns | High quality     |
| Aldafermin 1mg SQ daily vs Resmetirom 80mg daily                              | 0 | No concerns   | Undetected | No concerns | No concerns    | Major concerns | No concerns | High quality     |
| Aldafermin 1mg SQ daily vs Saroglitazar 4mg daily                             | 0 | Some concerns | Undetected | No concerns | Major concerns | No concerns    | No concerns | Moderate quality |
| Aldafermin 1mg SQ daily vs Silymarin 420mg                                    | 0 | No concerns   | Undetected | No concerns | Major concerns | No concerns    | No concerns | High quality     |
| Aldafermin 1mg SQ daily vs Silymarin 700mg                                    | 0 | No concerns   | Undetected | No concerns | Major concerns | No concerns    | No concerns | High quality     |
| Aldafermin 1mg SQ daily vs Simtuzumab 125mg SQ weekly                         | 0 | Some concerns | Undetected | No concerns | No concerns    | Major concerns | No concerns | Moderate quality |
| Aldafermin 1mg SQ daily vs Simtuzumab 200mg IV every other week               | 0 | Some concerns | Undetected | No concerns | No concerns    | Major concerns | No concerns | Moderate quality |
| Aldafermin 1mg SQ daily vs Simtuzumab 700mg IV every other week               | 0 | Some concerns | Undetected | No concerns | No concerns    | Major concerns | No concerns | Moderate quality |
| Aldafermin 1mg SQ daily vs Simtuzumab 75mg SQ weekly                          | 0 | Some concerns | Undetected | No concerns | Major concerns | No concerns    | No concerns | Moderate quality |
| Aldafermin 1mg SQ daily vs Sitagliptin 100mg daily                            | 0 | Some concerns | Undetected | No concerns | Major concerns | No concerns    | No concerns | Moderate quality |
| Aldafermin 1mg SQ daily vs Telmisartan 40mg daily                             | 0 | Some concerns | Undetected | No concerns | Major concerns | No concerns    | No concerns | Moderate quality |
| Aldafermin 1mg SQ daily vs Vitamin E 800 IU daily                             | 0 | No concerns   | Undetected | No concerns | Major concerns | No concerns    | No concerns | High quality     |
| Aldafermin 1mg SQ daily vs Vitamin E 800 IU daily and Pioglitazone 45mg daily | 0 | No concerns   | Undetected | No concerns | Major concerns | No concerns    | No concerns | High quality     |
| Aldafermin 1mg SQ daily vs Volixibat 10mg daily                               | 0 | No concerns   | Undetected | No concerns | No concerns    | Major concerns | No concerns | High quality     |
| Aldafermin 1mg SQ daily vs Volixibat 20mg daily                               | 0 | No concerns   | Undetected | No concerns | No concerns    | Major concerns | No concerns | High quality     |
| Aldafermin 1mg SQ daily vs Volixibat 5mg daily                                | 0 | No concerns   | Undetected | No concerns | No concerns    | Major concerns | No concerns | High quality     |

|                                                                  |   |                |            |             |                |                |             |                  |
|------------------------------------------------------------------|---|----------------|------------|-------------|----------------|----------------|-------------|------------------|
| Aldafermin 1mg SQ daily vs omega 3 PUFA (EPA 1050mg) daily       | 0 | No concerns    | Undetected | No concerns | Major concerns | No concerns    | No concerns | High quality     |
| Aldafermin 1mg SQ daily vs omega 3 PUFA (EPA 2160mg) daily       | 0 | No concerns    | Undetected | No concerns | No concerns    | Major concerns | No concerns | High quality     |
| Aldafermin 1mg SQ daily vs omega 3 PUFA (EPA 600mg) TID          | 0 | No concerns    | Undetected | No concerns | No concerns    | Major concerns | No concerns | High quality     |
| Aldafermin 1mg SQ daily vs omega 3 PUFA (EPA 900mg) TID          | 0 | No concerns    | Undetected | No concerns | No concerns    | Major concerns | No concerns | High quality     |
| Cenicriviroc 150mg daily vs Colesevelam 3.75g daily              | 0 | Some concerns  | Undetected | No concerns | Major concerns | No concerns    | No concerns | Moderate quality |
| Cenicriviroc 150mg daily vs Elafibranor 120 mg daily             | 0 | No concerns    | Undetected | No concerns | Major concerns | No concerns    | No concerns | High quality     |
| Cenicriviroc 150mg daily vs Elafibranor 80 mg daily              | 0 | No concerns    | Undetected | No concerns | Major concerns | No concerns    | No concerns | High quality     |
| Cenicriviroc 150mg daily vs Emricasan 50mg BID                   | 0 | No concerns    | Undetected | No concerns | Major concerns | No concerns    | No concerns | High quality     |
| Cenicriviroc 150mg daily vs Emricasan 5mg BID                    | 0 | No concerns    | Undetected | No concerns | Major concerns | No concerns    | No concerns | High quality     |
| Cenicriviroc 150mg daily vs Ezetimibe 10mg daily                 | 0 | Some concerns  | Undetected | No concerns | Major concerns | No concerns    | No concerns | Moderate quality |
| Cenicriviroc 150mg daily vs MSDC0602K 125mg TID                  | 0 | No concerns    | Undetected | No concerns | Major concerns | No concerns    | No concerns | High quality     |
| Cenicriviroc 150mg daily vs MSDC0602K 250mg TID                  | 0 | No concerns    | Undetected | No concerns | Major concerns | No concerns    | No concerns | High quality     |
| Cenicriviroc 150mg daily vs MSDC0602K 62.5mg TID                 | 0 | No concerns    | Undetected | No concerns | Major concerns | No concerns    | No concerns | High quality     |
| Cenicriviroc 150mg daily vs Obeticholic acid 10mg daily          | 0 | No concerns    | Undetected | No concerns | Major concerns | No concerns    | No concerns | High quality     |
| Cenicriviroc 150mg daily vs Obeticholic acid 25mg daily          | 0 | No concerns    | Undetected | No concerns | Major concerns | No concerns    | No concerns | High quality     |
| Cenicriviroc 150mg daily vs Pentoxifylline 400mg TID             | 0 | Some concerns  | Undetected | No concerns | Major concerns | No concerns    | No concerns | Moderate quality |
| Cenicriviroc 150mg daily vs Pioglitazone 30mg daily              | 0 | No concerns    | Undetected | No concerns | Major concerns | No concerns    | No concerns | High quality     |
| Cenicriviroc 150mg daily vs Pioglitazone 45mg daily              | 0 | Some concerns  | Undetected | No concerns | No concerns    | Major concerns | No concerns | Moderate quality |
| Cenicriviroc 150mg daily vs Resmetirom 80mg daily                | 0 | Some concerns  | Undetected | No concerns | Major concerns | No concerns    | No concerns | Moderate quality |
| Cenicriviroc 150mg daily vs Saroglitazar 4mg daily               | 0 | Major concerns | Undetected | No concerns | Major concerns | No concerns    | No concerns | Low quality      |
| Cenicriviroc 150mg daily vs Silymarin 420mg                      | 0 | No concerns    | Undetected | No concerns | Major concerns | No concerns    | No concerns | High quality     |
| Cenicriviroc 150mg daily vs Silymarin 700mg                      | 0 | No concerns    | Undetected | No concerns | Major concerns | No concerns    | No concerns | High quality     |
| Cenicriviroc 150mg daily vs Simtuzumab 125mg SQ weekly           | 0 | Some concerns  | Undetected | No concerns | Major concerns | No concerns    | No concerns | Moderate quality |
| Cenicriviroc 150mg daily vs Simtuzumab 200mg IV every other week | 0 | Some concerns  | Undetected | No concerns | Major concerns | No concerns    | No concerns | Moderate quality |
| Cenicriviroc 150mg daily vs Simtuzumab 700mg IV every other week | 0 | Some concerns  | Undetected | No concerns | Major concerns | No concerns    | No concerns | Moderate quality |

|                                                                                |   |                |            |             |                |                |             |                  |
|--------------------------------------------------------------------------------|---|----------------|------------|-------------|----------------|----------------|-------------|------------------|
| Cenicriviroc 150mg daily vs Simtuzumab 75mg SQ weekly                          | 0 | Some concerns  | Undetected | No concerns | Major concerns | No concerns    | No concerns | Moderate quality |
| Cenicriviroc 150mg daily vs Sitagliptin 100mg daily                            | 0 | Major concerns | Undetected | No concerns | Major concerns | No concerns    | No concerns | Low quality      |
| Cenicriviroc 150mg daily vs Telmisartan 40mg daily                             | 0 | Major concerns | Undetected | No concerns | Major concerns | No concerns    | No concerns | Low quality      |
| Cenicriviroc 150mg daily vs Vitamin E 800 IU daily                             | 0 | No concerns    | Undetected | No concerns | Major concerns | No concerns    | No concerns | High quality     |
| Cenicriviroc 150mg daily vs Vitamin E 800 IU daily and Pioglitazone 45mg daily | 0 | No concerns    | Undetected | No concerns | No concerns    | Major concerns | No concerns | High quality     |
| Cenicriviroc 150mg daily vs Volixibat 10mg daily                               | 0 | No concerns    | Undetected | No concerns | Major concerns | No concerns    | No concerns | High quality     |
| Cenicriviroc 150mg daily vs Volixibat 20mg daily                               | 0 | No concerns    | Undetected | No concerns | Major concerns | No concerns    | No concerns | High quality     |
| Cenicriviroc 150mg daily vs Volixibat 5mg daily                                | 0 | No concerns    | Undetected | No concerns | Major concerns | No concerns    | No concerns | High quality     |
| Cenicriviroc 150mg daily vs omega 3 PUFA (EPA 1050mg) daily                    | 0 | Some concerns  | Undetected | No concerns | Major concerns | No concerns    | No concerns | Moderate quality |
| Cenicriviroc 150mg daily vs omega 3 PUFA (EPA 2160mg) daily                    | 0 | Some concerns  | Undetected | No concerns | Major concerns | No concerns    | No concerns | Moderate quality |
| Cenicriviroc 150mg daily vs omega 3 PUFA (EPA 600mg) TID                       | 0 | No concerns    | Undetected | No concerns | Major concerns | No concerns    | No concerns | High quality     |
| Cenicriviroc 150mg daily vs omega 3 PUFA (EPA 900mg) TID                       | 0 | No concerns    | Undetected | No concerns | Major concerns | No concerns    | No concerns | High quality     |
| Colesevelam 3.75g daily vs Elafibranol 120 mg daily                            | 0 | No concerns    | Undetected | No concerns | Major concerns | No concerns    | No concerns | High quality     |
| Colesevelam 3.75g daily vs Elafibranol 80 mg daily                             | 0 | No concerns    | Undetected | No concerns | Major concerns | No concerns    | No concerns | High quality     |
| Colesevelam 3.75g daily vs Emricasan 50mg BID                                  | 0 | No concerns    | Undetected | No concerns | No concerns    | Major concerns | No concerns | High quality     |
| Colesevelam 3.75g daily vs Emricasan 5mg BID                                   | 0 | No concerns    | Undetected | No concerns | No concerns    | Major concerns | No concerns | High quality     |
| Colesevelam 3.75g daily vs Ezetimibe 10mg daily                                | 0 | No concerns    | Undetected | No concerns | Major concerns | No concerns    | No concerns | High quality     |
| Colesevelam 3.75g daily vs MSDC0602K 125mg TID                                 | 0 | No concerns    | Undetected | No concerns | Major concerns | No concerns    | No concerns | High quality     |
| Colesevelam 3.75g daily vs MSDC0602K 250mg TID                                 | 0 | No concerns    | Undetected | No concerns | Major concerns | No concerns    | No concerns | High quality     |
| Colesevelam 3.75g daily vs MSDC0602K 62.5mg TID                                | 0 | No concerns    | Undetected | No concerns | Major concerns | No concerns    | No concerns | High quality     |
| Colesevelam 3.75g daily vs Obeticholic acid 10mg daily                         | 0 | No concerns    | Undetected | No concerns | Major concerns | No concerns    | No concerns | High quality     |
| Colesevelam 3.75g daily vs Obeticholic acid 25mg daily                         | 0 | No concerns    | Undetected | No concerns | Major concerns | No concerns    | No concerns | High quality     |
| Colesevelam 3.75g daily vs Pentoxifylline 400mg TID                            | 0 | Some concerns  | Undetected | No concerns | Major concerns | No concerns    | No concerns | Moderate quality |
| Colesevelam 3.75g daily vs Pioglitazone 30mg daily                             | 0 | No concerns    | Undetected | No concerns | Major concerns | No concerns    | No concerns | High quality     |
| Colesevelam 3.75g daily vs Pioglitazone 45mg daily                             | 0 | No concerns    | Undetected | No concerns | Major concerns | No concerns    | No concerns | High quality     |
| Colesevelam 3.75g daily vs Resmetirom 80mg daily                               | 0 | No concerns    | Undetected | No concerns | Major concerns | No concerns    | No concerns | High quality     |

|                                                                               |   |               |            |             |                |                |             |                  |
|-------------------------------------------------------------------------------|---|---------------|------------|-------------|----------------|----------------|-------------|------------------|
| Colesevelam 3.75g daily vs Saroglitazar 4mg daily                             | 0 | Some concerns | Undetected | No concerns | Major concerns | No concerns    | No concerns | Moderate quality |
| Colesevelam 3.75g daily vs Silymarin 420mg                                    | 0 | No concerns   | Undetected | No concerns | Major concerns | No concerns    | No concerns | High quality     |
| Colesevelam 3.75g daily vs Silymarin 700mg                                    | 0 | No concerns   | Undetected | No concerns | Major concerns | No concerns    | No concerns | High quality     |
| Colesevelam 3.75g daily vs Simtuzumab 125mg SQ weekly                         | 0 | Some concerns | Undetected | No concerns | Major concerns | No concerns    | No concerns | Moderate quality |
| Colesevelam 3.75g daily vs Simtuzumab 200mg IV every other week               | 0 | Some concerns | Undetected | No concerns | Major concerns | No concerns    | No concerns | Moderate quality |
| Colesevelam 3.75g daily vs Simtuzumab 700mg IV every other week               | 0 | Some concerns | Undetected | No concerns | Major concerns | No concerns    | No concerns | Moderate quality |
| Colesevelam 3.75g daily vs Simtuzumab 75mg SQ weekly                          | 0 | Some concerns | Undetected | No concerns | Major concerns | No concerns    | No concerns | Moderate quality |
| Colesevelam 3.75g daily vs Sitagliptin 100mg daily                            | 0 | Some concerns | Undetected | No concerns | Major concerns | No concerns    | No concerns | Moderate quality |
| Colesevelam 3.75g daily vs Telmisartan 40mg daily                             | 0 | Some concerns | Undetected | No concerns | Major concerns | No concerns    | No concerns | Moderate quality |
| Colesevelam 3.75g daily vs Vitamin E 800 IU daily                             | 0 | No concerns   | Undetected | No concerns | Major concerns | No concerns    | No concerns | High quality     |
| Colesevelam 3.75g daily vs Vitamin E 800 IU daily and Pioglitazone 45mg daily | 0 | No concerns   | Undetected | No concerns | Major concerns | No concerns    | No concerns | High quality     |
| Colesevelam 3.75g daily vs Volixibat 10mg daily                               | 0 | No concerns   | Undetected | No concerns | Major concerns | No concerns    | No concerns | High quality     |
| Colesevelam 3.75g daily vs Volixibat 20mg daily                               | 0 | No concerns   | Undetected | No concerns | Major concerns | No concerns    | No concerns | High quality     |
| Colesevelam 3.75g daily vs Volixibat 5mg daily                                | 0 | No concerns   | Undetected | No concerns | Major concerns | No concerns    | No concerns | High quality     |
| Colesevelam 3.75g daily vs omega 3 PUFA (EPA 1050mg) daily                    | 0 | No concerns   | Undetected | No concerns | Major concerns | No concerns    | No concerns | High quality     |
| Colesevelam 3.75g daily vs omega 3 PUFA (EPA 2160mg) daily                    | 0 | No concerns   | Undetected | No concerns | Major concerns | No concerns    | No concerns | High quality     |
| Colesevelam 3.75g daily vs omega 3 PUFA (EPA 600mg) TID                       | 0 | No concerns   | Undetected | No concerns | Major concerns | No concerns    | No concerns | High quality     |
| Colesevelam 3.75g daily vs omega 3 PUFA (EPA 900mg) TID                       | 0 | No concerns   | Undetected | No concerns | Major concerns | No concerns    | No concerns | High quality     |
| Elafibranor 120 mg daily vs Emricasan 50mg BID                                | 0 | No concerns   | Undetected | No concerns | No concerns    | Major concerns | No concerns | High quality     |
| Elafibranor 120 mg daily vs Emricasan 5mg BID                                 | 0 | No concerns   | Undetected | No concerns | No concerns    | Major concerns | No concerns | High quality     |
| Elafibranor 120 mg daily vs Ezetimibe 10mg daily                              | 0 | No concerns   | Undetected | No concerns | Major concerns | No concerns    | No concerns | High quality     |
| Elafibranor 120 mg daily vs MSDC0602K 125mg TID                               | 0 | No concerns   | Undetected | No concerns | Major concerns | No concerns    | No concerns | High quality     |
| Elafibranor 120 mg daily vs MSDC0602K 250mg TID                               | 0 | No concerns   | Undetected | No concerns | Major concerns | No concerns    | No concerns | High quality     |
| Elafibranor 120 mg daily vs MSDC0602K 62.5mg TID                              | 0 | No concerns   | Undetected | No concerns | Major concerns | No concerns    | No concerns | High quality     |
| Elafibranor 120 mg daily vs Obeticholic acid 10mg daily                       | 0 | No concerns   | Undetected | No concerns | Major concerns | No concerns    | No concerns | High quality     |

|                                                                                |   |               |            |             |                |                |             |                  |
|--------------------------------------------------------------------------------|---|---------------|------------|-------------|----------------|----------------|-------------|------------------|
| Elafibranor 120 mg daily vs Obeticholic acid 25mg daily                        | 0 | No concerns   | Undetected | No concerns | Major concerns | No concerns    | No concerns | High quality     |
| Elafibranor 120 mg daily vs Pentoxifylline 400mg TID                           | 0 | No concerns   | Undetected | No concerns | No concerns    | Major concerns | No concerns | High quality     |
| Elafibranor 120 mg daily vs Pioglitazone 30mg daily                            | 0 | No concerns   | Undetected | No concerns | Major concerns | No concerns    | No concerns | High quality     |
| Elafibranor 120 mg daily vs Pioglitazone 45mg daily                            | 0 | No concerns   | Undetected | No concerns | No concerns    | Major concerns | No concerns | High quality     |
| Elafibranor 120 mg daily vs Resmetirom 80mg daily                              | 0 | No concerns   | Undetected | No concerns | Major concerns | No concerns    | No concerns | High quality     |
| Elafibranor 120 mg daily vs Saroglitazar 4mg daily                             | 0 | Some concerns | Undetected | No concerns | Major concerns | No concerns    | No concerns | Moderate quality |
| Elafibranor 120 mg daily vs Silymarin 420mg                                    | 0 | No concerns   | Undetected | No concerns | Major concerns | No concerns    | No concerns | High quality     |
| Elafibranor 120 mg daily vs Silymarin 700mg                                    | 0 | No concerns   | Undetected | No concerns | Major concerns | No concerns    | No concerns | High quality     |
| Elafibranor 120 mg daily vs Simtuzumab 125mg SQ weekly                         | 0 | Some concerns | Undetected | No concerns | Major concerns | No concerns    | No concerns | Moderate quality |
| Elafibranor 120 mg daily vs Simtuzumab 200mg IV every other week               | 0 | Some concerns | Undetected | No concerns | Major concerns | No concerns    | No concerns | Moderate quality |
| Elafibranor 120 mg daily vs Simtuzumab 700mg IV every other week               | 0 | Some concerns | Undetected | No concerns | No concerns    | Major concerns | No concerns | Moderate quality |
| Elafibranor 120 mg daily vs Simtuzumab 75mg SQ weekly                          | 0 | Some concerns | Undetected | No concerns | Major concerns | No concerns    | No concerns | Moderate quality |
| Elafibranor 120 mg daily vs Sitagliptin 100mg daily                            | 0 | Some concerns | Undetected | No concerns | Major concerns | No concerns    | No concerns | Moderate quality |
| Elafibranor 120 mg daily vs Telmisartan 40mg daily                             | 0 | Some concerns | Undetected | No concerns | Major concerns | No concerns    | No concerns | Moderate quality |
| Elafibranor 120 mg daily vs Vitamin E 800 IU daily                             | 0 | No concerns   | Undetected | No concerns | Major concerns | No concerns    | No concerns | High quality     |
| Elafibranor 120 mg daily vs Vitamin E 800 IU daily and Pioglitazone 45mg daily | 0 | No concerns   | Undetected | No concerns | No concerns    | Major concerns | No concerns | High quality     |
| Elafibranor 120 mg daily vs Volixibat 10mg daily                               | 0 | No concerns   | Undetected | No concerns | Major concerns | No concerns    | No concerns | High quality     |
| Elafibranor 120 mg daily vs Volixibat 20mg daily                               | 0 | No concerns   | Undetected | No concerns | Major concerns | No concerns    | No concerns | High quality     |
| Elafibranor 120 mg daily vs Volixibat 5mg daily                                | 0 | No concerns   | Undetected | No concerns | Major concerns | No concerns    | No concerns | High quality     |
| Elafibranor 120 mg daily vs omega 3 PUFA (EPA 1050mg) daily                    | 0 | No concerns   | Undetected | No concerns | Major concerns | No concerns    | No concerns | High quality     |
| Elafibranor 120 mg daily vs omega 3 PUFA (EPA 2160mg) daily                    | 0 | No concerns   | Undetected | No concerns | Major concerns | No concerns    | No concerns | High quality     |
| Elafibranor 120 mg daily vs omega 3 PUFA (EPA 600mg) TID                       | 0 | No concerns   | Undetected | No concerns | Major concerns | No concerns    | No concerns | High quality     |
| Elafibranor 120 mg daily vs omega 3 PUFA (EPA 900mg) TID                       | 0 | No concerns   | Undetected | No concerns | Major concerns | No concerns    | No concerns | High quality     |
| Elafibranor 80 mg daily vs Emricasan 50mg BID                                  | 0 | No concerns   | Undetected | No concerns | Major concerns | No concerns    | No concerns | High quality     |
| Elafibranor 80 mg daily vs Emricasan 5mg BID                                   | 0 | No concerns   | Undetected | No concerns | Major concerns | No concerns    | No concerns | High quality     |

|                                                                               |   |               |            |             |                |                |             |                  |
|-------------------------------------------------------------------------------|---|---------------|------------|-------------|----------------|----------------|-------------|------------------|
| Elafibranor 80 mg daily vs Ezetimibe 10mg daily                               | 0 | No concerns   | Undetected | No concerns | Major concerns | No concerns    | No concerns | High quality     |
| Elafibranor 80 mg daily vs MSDC0602K 125mg TID                                | 0 | No concerns   | Undetected | No concerns | Major concerns | No concerns    | No concerns | High quality     |
| Elafibranor 80 mg daily vs MSDC0602K 250mg TID                                | 0 | No concerns   | Undetected | No concerns | Major concerns | No concerns    | No concerns | High quality     |
| Elafibranor 80 mg daily vs MSDC0602K 62.5mg TID                               | 0 | No concerns   | Undetected | No concerns | Major concerns | No concerns    | No concerns | High quality     |
| Elafibranor 80 mg daily vs Obeticholic acid 10mg daily                        | 0 | No concerns   | Undetected | No concerns | Major concerns | No concerns    | No concerns | High quality     |
| Elafibranor 80 mg daily vs Obeticholic acid 25mg daily                        | 0 | No concerns   | Undetected | No concerns | No concerns    | Major concerns | No concerns | High quality     |
| Elafibranor 80 mg daily vs Pentoxifylline 400mg TID                           | 0 | No concerns   | Undetected | No concerns | No concerns    | Major concerns | No concerns | High quality     |
| Elafibranor 80 mg daily vs Pioglitazone 30mg daily                            | 0 | No concerns   | Undetected | No concerns | Major concerns | No concerns    | No concerns | High quality     |
| Elafibranor 80 mg daily vs Pioglitazone 45mg daily                            | 0 | No concerns   | Undetected | No concerns | No concerns    | Major concerns | No concerns | High quality     |
| Elafibranor 80 mg daily vs Resmetirom 80mg daily                              | 0 | No concerns   | Undetected | No concerns | Major concerns | No concerns    | No concerns | High quality     |
| Elafibranor 80 mg daily vs Saroglitazar 4mg daily                             | 0 | Some concerns | Undetected | No concerns | No concerns    | Major concerns | No concerns | Moderate quality |
| Elafibranor 80 mg daily vs Silymarin 420mg                                    | 0 | No concerns   | Undetected | No concerns | Major concerns | No concerns    | No concerns | High quality     |
| Elafibranor 80 mg daily vs Silymarin 700mg                                    | 0 | No concerns   | Undetected | No concerns | Major concerns | No concerns    | No concerns | High quality     |
| Elafibranor 80 mg daily vs Simtuzumab 125mg SQ weekly                         | 0 | No concerns   | Undetected | No concerns | Major concerns | No concerns    | No concerns | High quality     |
| Elafibranor 80 mg daily vs Simtuzumab 200mg IV every other week               | 0 | No concerns   | Undetected | No concerns | Major concerns | No concerns    | No concerns | High quality     |
| Elafibranor 80 mg daily vs Simtuzumab 700mg IV every other week               | 0 | No concerns   | Undetected | No concerns | Major concerns | No concerns    | No concerns | High quality     |
| Elafibranor 80 mg daily vs Simtuzumab 75mg SQ weekly                          | 0 | No concerns   | Undetected | No concerns | Major concerns | No concerns    | No concerns | High quality     |
| Elafibranor 80 mg daily vs Sitagliptin 100mg daily                            | 0 | Some concerns | Undetected | No concerns | No concerns    | Major concerns | No concerns | Moderate quality |
| Elafibranor 80 mg daily vs Telmisartan 40mg daily                             | 0 | Some concerns | Undetected | No concerns | Major concerns | No concerns    | No concerns | Moderate quality |
| Elafibranor 80 mg daily vs Vitamin E 800 IU daily                             | 0 | No concerns   | Undetected | No concerns | No concerns    | Major concerns | No concerns | High quality     |
| Elafibranor 80 mg daily vs Vitamin E 800 IU daily and Pioglitazone 45mg daily | 0 | No concerns   | Undetected | No concerns | No concerns    | Major concerns | No concerns | High quality     |
| Elafibranor 80 mg daily vs Volixibat 10mg daily                               | 0 | No concerns   | Undetected | No concerns | Major concerns | No concerns    | No concerns | High quality     |
| Elafibranor 80 mg daily vs Volixibat 20mg daily                               | 0 | No concerns   | Undetected | No concerns | Major concerns | No concerns    | No concerns | High quality     |
| Elafibranor 80 mg daily vs Volixibat 5mg daily                                | 0 | No concerns   | Undetected | No concerns | Major concerns | No concerns    | No concerns | High quality     |
| Elafibranor 80 mg daily vs omega 3 PUFA (EPA 1050mg) daily                    | 0 | No concerns   | Undetected | No concerns | Major concerns | No concerns    | No concerns | High quality     |
| Elafibranor 80 mg daily vs omega 3 PUFA (EPA 2160mg) daily                    | 0 | No concerns   | Undetected | No concerns | Major concerns | No concerns    | No concerns | High quality     |



|                                                                          |   |               |            |             |                |                |             |                  |
|--------------------------------------------------------------------------|---|---------------|------------|-------------|----------------|----------------|-------------|------------------|
| Elafibranor 80 mg daily vs omega 3 PUFA (EPA 600mg) TID                  | 0 | No concerns   | Undetected | No concerns | Major concerns | No concerns    | No concerns | High quality     |
| Elafibranor 80 mg daily vs omega 3 PUFA (EPA 900mg) TID                  | 0 | No concerns   | Undetected | No concerns | Major concerns | No concerns    | No concerns | High quality     |
| Emricasan 50mg BID vs Ezetimibe 10mg daily                               | 0 | No concerns   | Undetected | No concerns | Major concerns | No concerns    | No concerns | High quality     |
| Emricasan 50mg BID vs MSDC0602K 125mg TID                                | 0 | No concerns   | Undetected | No concerns | Major concerns | No concerns    | No concerns | High quality     |
| Emricasan 50mg BID vs MSDC0602K 250mg TID                                | 0 | No concerns   | Undetected | No concerns | No concerns    | Major concerns | No concerns | High quality     |
| Emricasan 50mg BID vs MSDC0602K 62.5mg TID                               | 0 | No concerns   | Undetected | No concerns | Major concerns | No concerns    | No concerns | High quality     |
| Emricasan 50mg BID vs Obeticholic acid 10mg daily                        | 0 | No concerns   | Undetected | No concerns | No concerns    | Major concerns | No concerns | High quality     |
| Emricasan 50mg BID vs Obeticholic acid 25mg daily                        | 0 | No concerns   | Undetected | No concerns | No concerns    | Major concerns | No concerns | High quality     |
| Emricasan 50mg BID vs Pentoxifylline 400mg TID                           | 0 | No concerns   | Undetected | No concerns | No concerns    | Major concerns | No concerns | High quality     |
| Emricasan 50mg BID vs Pioglitazone 30mg daily                            | 0 | No concerns   | Undetected | No concerns | No concerns    | Major concerns | No concerns | High quality     |
| Emricasan 50mg BID vs Pioglitazone 45mg daily                            | 0 | No concerns   | Undetected | No concerns | No concerns    | Major concerns | No concerns | High quality     |
| Emricasan 50mg BID vs Resmetirom 80mg daily                              | 0 | No concerns   | Undetected | No concerns | No concerns    | Major concerns | No concerns | High quality     |
| Emricasan 50mg BID vs Saroglitazar 4mg daily                             | 0 | Some concerns | Undetected | No concerns | No concerns    | Major concerns | No concerns | Moderate quality |
| Emricasan 50mg BID vs Silymarin 420mg                                    | 0 | No concerns   | Undetected | No concerns | Major concerns | No concerns    | No concerns | High quality     |
| Emricasan 50mg BID vs Silymarin 700mg                                    | 0 | No concerns   | Undetected | No concerns | Major concerns | No concerns    | No concerns | High quality     |
| Emricasan 50mg BID vs Simtuzumab 125mg SQ weekly                         | 0 | Some concerns | Undetected | No concerns | Major concerns | No concerns    | No concerns | Moderate quality |
| Emricasan 50mg BID vs Simtuzumab 200mg IV every other week               | 0 | No concerns   | Undetected | No concerns | Major concerns | No concerns    | No concerns | High quality     |
| Emricasan 50mg BID vs Simtuzumab 700mg IV every other week               | 0 | Some concerns | Undetected | No concerns | Major concerns | No concerns    | No concerns | Moderate quality |
| Emricasan 50mg BID vs Simtuzumab 75mg SQ weekly                          | 0 | Some concerns | Undetected | No concerns | No concerns    | Major concerns | No concerns | Moderate quality |
| Emricasan 50mg BID vs Sitagliptin 100mg daily                            | 0 | Some concerns | Undetected | No concerns | No concerns    | Major concerns | No concerns | Moderate quality |
| Emricasan 50mg BID vs Telmisartan 40mg daily                             | 0 | Some concerns | Undetected | No concerns | No concerns    | Major concerns | No concerns | Moderate quality |
| Emricasan 50mg BID vs Vitamin E 800 IU daily                             | 0 | No concerns   | Undetected | No concerns | No concerns    | Major concerns | No concerns | High quality     |
| Emricasan 50mg BID vs Vitamin E 800 IU daily and Pioglitazone 45mg daily | 0 | No concerns   | Undetected | No concerns | No concerns    | Major concerns | No concerns | High quality     |
| Emricasan 50mg BID vs Volixibat 10mg daily                               | 0 | No concerns   | Undetected | No concerns | Major concerns | No concerns    | No concerns | High quality     |
| Emricasan 50mg BID vs Volixibat 20mg daily                               | 0 | No concerns   | Undetected | No concerns | Major concerns | No concerns    | No concerns | High quality     |
| Emricasan 50mg BID vs Volixibat 5mg daily                                | 0 | No concerns   | Undetected | No concerns | Major concerns | No concerns    | No concerns | High quality     |



|                                                                         |   |               |            |             |                |                |             |                  |
|-------------------------------------------------------------------------|---|---------------|------------|-------------|----------------|----------------|-------------|------------------|
| Emricasan 50mg BID vs omega 3 PUFA (EPA 1050mg) daily                   | 0 | No concerns   | Undetected | No concerns | Major concerns | No concerns    | No concerns | High quality     |
| Emricasan 50mg BID vs omega 3 PUFA (EPA 2160mg) daily                   | 0 | No concerns   | Undetected | No concerns | Major concerns | No concerns    | No concerns | High quality     |
| Emricasan 50mg BID vs omega 3 PUFA (EPA 600mg) TID                      | 0 | No concerns   | Undetected | No concerns | Major concerns | No concerns    | No concerns | High quality     |
| Emricasan 50mg BID vs omega 3 PUFA (EPA 900mg) TID                      | 0 | No concerns   | Undetected | No concerns | Major concerns | No concerns    | No concerns | High quality     |
| Emricasan 5mg BID vs Ezetimibe 10mg daily                               | 0 | No concerns   | Undetected | No concerns | Major concerns | No concerns    | No concerns | High quality     |
| Emricasan 5mg BID vs MSDC0602K 125mg TID                                | 0 | No concerns   | Undetected | No concerns | Major concerns | No concerns    | No concerns | High quality     |
| Emricasan 5mg BID vs MSDC0602K 250mg TID                                | 0 | No concerns   | Undetected | No concerns | No concerns    | Major concerns | No concerns | High quality     |
| Emricasan 5mg BID vs MSDC0602K 62.5mg TID                               | 0 | No concerns   | Undetected | No concerns | Major concerns | No concerns    | No concerns | High quality     |
| Emricasan 5mg BID vs Obeticholic acid 10mg daily                        | 0 | No concerns   | Undetected | No concerns | No concerns    | Major concerns | No concerns | High quality     |
| Emricasan 5mg BID vs Obeticholic acid 25mg daily                        | 0 | No concerns   | Undetected | No concerns | No concerns    | Major concerns | No concerns | High quality     |
| Emricasan 5mg BID vs Pentoxifylline 400mg TID                           | 0 | No concerns   | Undetected | No concerns | No concerns    | Major concerns | No concerns | High quality     |
| Emricasan 5mg BID vs Pioglitazone 30mg daily                            | 0 | No concerns   | Undetected | No concerns | No concerns    | Major concerns | No concerns | High quality     |
| Emricasan 5mg BID vs Pioglitazone 45mg daily                            | 0 | No concerns   | Undetected | No concerns | No concerns    | Major concerns | No concerns | High quality     |
| Emricasan 5mg BID vs Resmetirom 80mg daily                              | 0 | No concerns   | Undetected | No concerns | No concerns    | Major concerns | No concerns | High quality     |
| Emricasan 5mg BID vs Saroglitazar 4mg daily                             | 0 | Some concerns | Undetected | No concerns | No concerns    | Major concerns | No concerns | Moderate quality |
| Emricasan 5mg BID vs Silymarin 420mg                                    | 0 | No concerns   | Undetected | No concerns | Major concerns | No concerns    | No concerns | High quality     |
| Emricasan 5mg BID vs Silymarin 700mg                                    | 0 | No concerns   | Undetected | No concerns | Major concerns | No concerns    | No concerns | High quality     |
| Emricasan 5mg BID vs Simtuzumab 125mg SQ weekly                         | 0 | Some concerns | Undetected | No concerns | Major concerns | No concerns    | No concerns | Moderate quality |
| Emricasan 5mg BID vs Simtuzumab 200mg IV every other week               | 0 | Some concerns | Undetected | No concerns | Major concerns | No concerns    | No concerns | Moderate quality |
| Emricasan 5mg BID vs Simtuzumab 700mg IV every other week               | 0 | Some concerns | Undetected | No concerns | Major concerns | No concerns    | No concerns | Moderate quality |
| Emricasan 5mg BID vs Simtuzumab 75mg SQ weekly                          | 0 | Some concerns | Undetected | No concerns | No concerns    | Major concerns | No concerns | Moderate quality |
| Emricasan 5mg BID vs Sitagliptin 100mg daily                            | 0 | Some concerns | Undetected | No concerns | No concerns    | Major concerns | No concerns | Moderate quality |
| Emricasan 5mg BID vs Telmisartan 40mg daily                             | 0 | Some concerns | Undetected | No concerns | No concerns    | Major concerns | No concerns | Moderate quality |
| Emricasan 5mg BID vs Vitamin E 800 IU daily                             | 0 | No concerns   | Undetected | No concerns | No concerns    | Major concerns | No concerns | High quality     |
| Emricasan 5mg BID vs Vitamin E 800 IU daily and Pioglitazone 45mg daily | 0 | No concerns   | Undetected | No concerns | No concerns    | Major concerns | No concerns | High quality     |
| Emricasan 5mg BID vs Volixibat 10mg daily                               | 0 | No concerns   | Undetected | No concerns | Major concerns | No concerns    | No concerns | High quality     |
| Emricasan 5mg BID vs Volixibat 20mg daily                               | 0 | No concerns   | Undetected | No concerns | Major concerns | No concerns    | No concerns | High quality     |

|                                                                            |   |               |            |             |                |             |             |                  |
|----------------------------------------------------------------------------|---|---------------|------------|-------------|----------------|-------------|-------------|------------------|
| Emricasan 5mg BID vs Volixibat 5mg daily                                   | 0 | No concerns   | Undetected | No concerns | Major concerns | No concerns | No concerns | High quality     |
| Emricasan 5mg BID vs omega 3 PUFA (EPA 1050mg) daily                       | 0 | No concerns   | Undetected | No concerns | Major concerns | No concerns | No concerns | High quality     |
| Emricasan 5mg BID vs omega 3 PUFA (EPA 2160mg) daily                       | 0 | No concerns   | Undetected | No concerns | Major concerns | No concerns | No concerns | High quality     |
| Emricasan 5mg BID vs omega 3 PUFA (EPA 600mg) TID                          | 0 | No concerns   | Undetected | No concerns | Major concerns | No concerns | No concerns | High quality     |
| Emricasan 5mg BID vs omega 3 PUFA (EPA 900mg) TID                          | 0 | No concerns   | Undetected | No concerns | Major concerns | No concerns | No concerns | High quality     |
| Ezetimibe 10mg daily vs MSDC0602K 125mg TID                                | 0 | No concerns   | Undetected | No concerns | Major concerns | No concerns | No concerns | High quality     |
| Ezetimibe 10mg daily vs MSDC0602K 250mg TID                                | 0 | No concerns   | Undetected | No concerns | Major concerns | No concerns | No concerns | High quality     |
| Ezetimibe 10mg daily vs MSDC0602K 62.5mg TID                               | 0 | No concerns   | Undetected | No concerns | Major concerns | No concerns | No concerns | High quality     |
| Ezetimibe 10mg daily vs Obeticholic acid 10mg daily                        | 0 | No concerns   | Undetected | No concerns | Major concerns | No concerns | No concerns | High quality     |
| Ezetimibe 10mg daily vs Obeticholic acid 25mg daily                        | 0 | No concerns   | Undetected | No concerns | Major concerns | No concerns | No concerns | High quality     |
| Ezetimibe 10mg daily vs Pentoxifylline 400mg TID                           | 0 | Some concerns | Undetected | No concerns | Major concerns | No concerns | No concerns | Moderate quality |
| Ezetimibe 10mg daily vs Pioglitazone 30mg daily                            | 0 | No concerns   | Undetected | No concerns | Major concerns | No concerns | No concerns | High quality     |
| Ezetimibe 10mg daily vs Pioglitazone 45mg daily                            | 0 | No concerns   | Undetected | No concerns | Major concerns | No concerns | No concerns | High quality     |
| Ezetimibe 10mg daily vs Resmetirom 80mg daily                              | 0 | No concerns   | Undetected | No concerns | Major concerns | No concerns | No concerns | High quality     |
| Ezetimibe 10mg daily vs Saroglitazar 4mg daily                             | 0 | Some concerns | Undetected | No concerns | Major concerns | No concerns | No concerns | Moderate quality |
| Ezetimibe 10mg daily vs Silymarin 420mg                                    | 0 | No concerns   | Undetected | No concerns | Major concerns | No concerns | No concerns | High quality     |
| Ezetimibe 10mg daily vs Silymarin 700mg                                    | 0 | No concerns   | Undetected | No concerns | Major concerns | No concerns | No concerns | High quality     |
| Ezetimibe 10mg daily vs Simtuzumab 125mg SQ weekly                         | 0 | Some concerns | Undetected | No concerns | Major concerns | No concerns | No concerns | Moderate quality |
| Ezetimibe 10mg daily vs Simtuzumab 200mg IV every other week               | 0 | Some concerns | Undetected | No concerns | Major concerns | No concerns | No concerns | Moderate quality |
| Ezetimibe 10mg daily vs Simtuzumab 700mg IV every other week               | 0 | Some concerns | Undetected | No concerns | Major concerns | No concerns | No concerns | Moderate quality |
| Ezetimibe 10mg daily vs Simtuzumab 75mg SQ weekly                          | 0 | Some concerns | Undetected | No concerns | Major concerns | No concerns | No concerns | Moderate quality |
| Ezetimibe 10mg daily vs Sitagliptin 100mg daily                            | 0 | Some concerns | Undetected | No concerns | Major concerns | No concerns | No concerns | Moderate quality |
| Ezetimibe 10mg daily vs Telmisartan 40mg daily                             | 0 | Some concerns | Undetected | No concerns | Major concerns | No concerns | No concerns | Moderate quality |
| Ezetimibe 10mg daily vs Vitamin E 800 IU daily                             | 0 | No concerns   | Undetected | No concerns | Major concerns | No concerns | No concerns | High quality     |
| Ezetimibe 10mg daily vs Vitamin E 800 IU daily and Pioglitazone 45mg daily | 0 | No concerns   | Undetected | No concerns | Major concerns | No concerns | No concerns | High quality     |
| Ezetimibe 10mg daily vs Volixibat 10mg daily                               | 0 | No concerns   | Undetected | No concerns | Major concerns | No concerns | No concerns | High quality     |

|                                                                           |   |               |            |             |                |                |             |                  |
|---------------------------------------------------------------------------|---|---------------|------------|-------------|----------------|----------------|-------------|------------------|
| Ezetimibe 10mg daily vs Volixibat 20mg daily                              | 0 | No concerns   | Undetected | No concerns | Major concerns | No concerns    | No concerns | High quality     |
| Ezetimibe 10mg daily vs Volixibat 5mg daily                               | 0 | No concerns   | Undetected | No concerns | Major concerns | No concerns    | No concerns | High quality     |
| Ezetimibe 10mg daily vs omega 3 PUFA (EPA 1050mg) daily                   | 0 | No concerns   | Undetected | No concerns | Major concerns | No concerns    | No concerns | High quality     |
| Ezetimibe 10mg daily vs omega 3 PUFA (EPA 2160mg) daily                   | 0 | No concerns   | Undetected | No concerns | Major concerns | No concerns    | No concerns | High quality     |
| Ezetimibe 10mg daily vs omega 3 PUFA (EPA 600mg) TID                      | 0 | No concerns   | Undetected | No concerns | Major concerns | No concerns    | No concerns | High quality     |
| Ezetimibe 10mg daily vs omega 3 PUFA (EPA 900mg) TID                      | 0 | No concerns   | Undetected | No concerns | Major concerns | No concerns    | No concerns | High quality     |
| MSDC0602K 125mg TID vs Obeticholic acid 10mg daily                        | 0 | No concerns   | Undetected | No concerns | Major concerns | No concerns    | No concerns | High quality     |
| MSDC0602K 125mg TID vs Obeticholic acid 25mg daily                        | 0 | No concerns   | Undetected | No concerns | Major concerns | No concerns    | No concerns | High quality     |
| MSDC0602K 125mg TID vs Pentoxifylline 400mg TID                           | 0 | No concerns   | Undetected | No concerns | No concerns    | Major concerns | No concerns | High quality     |
| MSDC0602K 125mg TID vs Pioglitazone 30mg daily                            | 0 | No concerns   | Undetected | No concerns | Major concerns | No concerns    | No concerns | High quality     |
| MSDC0602K 125mg TID vs Pioglitazone 45mg daily                            | 0 | No concerns   | Undetected | No concerns | No concerns    | Major concerns | No concerns | High quality     |
| MSDC0602K 125mg TID vs Resmetirom 80mg daily                              | 0 | No concerns   | Undetected | No concerns | Major concerns | No concerns    | No concerns | High quality     |
| MSDC0602K 125mg TID vs Saroglitazar 4mg daily                             | 0 | Some concerns | Undetected | No concerns | Major concerns | No concerns    | No concerns | Moderate quality |
| MSDC0602K 125mg TID vs Silymarin 420mg                                    | 0 | No concerns   | Undetected | No concerns | Major concerns | No concerns    | No concerns | High quality     |
| MSDC0602K 125mg TID vs Silymarin 700mg                                    | 0 | No concerns   | Undetected | No concerns | Major concerns | No concerns    | No concerns | High quality     |
| MSDC0602K 125mg TID vs Simtuzumab 125mg SQ weekly                         | 0 | No concerns   | Undetected | No concerns | Major concerns | No concerns    | No concerns | High quality     |
| MSDC0602K 125mg TID vs Simtuzumab 200mg IV every other week               | 0 | No concerns   | Undetected | No concerns | Major concerns | No concerns    | No concerns | High quality     |
| MSDC0602K 125mg TID vs Simtuzumab 700mg IV every other week               | 0 | No concerns   | Undetected | No concerns | Major concerns | No concerns    | No concerns | High quality     |
| MSDC0602K 125mg TID vs Simtuzumab 75mg SQ weekly                          | 0 | No concerns   | Undetected | No concerns | Major concerns | No concerns    | No concerns | High quality     |
| MSDC0602K 125mg TID vs Sitagliptin 100mg daily                            | 0 | Some concerns | Undetected | No concerns | Major concerns | No concerns    | No concerns | Moderate quality |
| MSDC0602K 125mg TID vs Telmisartan 40mg daily                             | 0 | Some concerns | Undetected | No concerns | Major concerns | No concerns    | No concerns | Moderate quality |
| MSDC0602K 125mg TID vs Vitamin E 800 IU daily                             | 0 | No concerns   | Undetected | No concerns | Major concerns | No concerns    | No concerns | High quality     |
| MSDC0602K 125mg TID vs Vitamin E 800 IU daily and Pioglitazone 45mg daily | 0 | No concerns   | Undetected | No concerns | No concerns    | Major concerns | No concerns | High quality     |
| MSDC0602K 125mg TID vs Volixibat 10mg daily                               | 0 | No concerns   | Undetected | No concerns | Major concerns | No concerns    | No concerns | High quality     |
| MSDC0602K 125mg TID vs Volixibat 20mg daily                               | 0 | No concerns   | Undetected | No concerns | Major concerns | No concerns    | No concerns | High quality     |
| MSDC0602K 125mg TID vs Volixibat 5mg daily                                | 0 | No concerns   | Undetected | No concerns | Major concerns | No concerns    | No concerns | High quality     |

|                                                                           |   |               |            |             |                |                |             |                  |
|---------------------------------------------------------------------------|---|---------------|------------|-------------|----------------|----------------|-------------|------------------|
| MSDC0602K 125mg TID vs omega 3 PUFA (EPA 1050mg) daily                    | 0 | No concerns   | Undetected | No concerns | Major concerns | No concerns    | No concerns | High quality     |
| MSDC0602K 125mg TID vs omega 3 PUFA (EPA 2160mg) daily                    | 0 | No concerns   | Undetected | No concerns | Major concerns | No concerns    | No concerns | High quality     |
| MSDC0602K 125mg TID vs omega 3 PUFA (EPA 600mg) TID                       | 0 | No concerns   | Undetected | No concerns | Major concerns | No concerns    | No concerns | High quality     |
| MSDC0602K 125mg TID vs omega 3 PUFA (EPA 900mg) TID                       | 0 | No concerns   | Undetected | No concerns | Major concerns | No concerns    | No concerns | High quality     |
| MSDC0602K 250mg TID vs Obeticholic acid 10mg daily                        | 0 | No concerns   | Undetected | No concerns | Major concerns | No concerns    | No concerns | High quality     |
| MSDC0602K 250mg TID vs Obeticholic acid 25mg daily                        | 0 | No concerns   | Undetected | No concerns | Major concerns | No concerns    | No concerns | High quality     |
| MSDC0602K 250mg TID vs Pentoxifylline 400mg TID                           | 0 | No concerns   | Undetected | No concerns | Major concerns | No concerns    | No concerns | High quality     |
| MSDC0602K 250mg TID vs Pioglitazone 30mg daily                            | 0 | No concerns   | Undetected | No concerns | Major concerns | No concerns    | No concerns | High quality     |
| MSDC0602K 250mg TID vs Pioglitazone 45mg daily                            | 0 | No concerns   | Undetected | No concerns | No concerns    | Major concerns | No concerns | High quality     |
| MSDC0602K 250mg TID vs Resmetrom 80mg daily                               | 0 | No concerns   | Undetected | No concerns | Major concerns | No concerns    | No concerns | High quality     |
| MSDC0602K 250mg TID vs Saroglitazar 4mg daily                             | 0 | Some concerns | Undetected | No concerns | Major concerns | No concerns    | No concerns | Moderate quality |
| MSDC0602K 250mg TID vs Silymarin 420mg                                    | 0 | No concerns   | Undetected | No concerns | Major concerns | No concerns    | No concerns | High quality     |
| MSDC0602K 250mg TID vs Silymarin 700mg                                    | 0 | No concerns   | Undetected | No concerns | Major concerns | No concerns    | No concerns | High quality     |
| MSDC0602K 250mg TID vs Simtuzumab 125mg SQ weekly                         | 0 | No concerns   | Undetected | No concerns | Major concerns | No concerns    | No concerns | High quality     |
| MSDC0602K 250mg TID vs Simtuzumab 200mg IV every other week               | 0 | No concerns   | Undetected | No concerns | Major concerns | No concerns    | No concerns | High quality     |
| MSDC0602K 250mg TID vs Simtuzumab 700mg IV every other week               | 0 | No concerns   | Undetected | No concerns | Major concerns | No concerns    | No concerns | High quality     |
| MSDC0602K 250mg TID vs Simtuzumab 75mg SQ weekly                          | 0 | No concerns   | Undetected | No concerns | Major concerns | No concerns    | No concerns | High quality     |
| MSDC0602K 250mg TID vs Sitagliptin 100mg daily                            | 0 | Some concerns | Undetected | No concerns | Major concerns | No concerns    | No concerns | Moderate quality |
| MSDC0602K 250mg TID vs Telmisartan 40mg daily                             | 0 | Some concerns | Undetected | No concerns | Major concerns | No concerns    | No concerns | Moderate quality |
| MSDC0602K 250mg TID vs Vitamin E 800 IU daily                             | 0 | No concerns   | Undetected | No concerns | Major concerns | No concerns    | No concerns | High quality     |
| MSDC0602K 250mg TID vs Vitamin E 800 IU daily and Pioglitazone 45mg daily | 0 | No concerns   | Undetected | No concerns | No concerns    | Major concerns | No concerns | High quality     |
| MSDC0602K 250mg TID vs Volixibat 10mg daily                               | 0 | No concerns   | Undetected | No concerns | Major concerns | No concerns    | No concerns | High quality     |
| MSDC0602K 250mg TID vs Volixibat 20mg daily                               | 0 | No concerns   | Undetected | No concerns | Major concerns | No concerns    | No concerns | High quality     |
| MSDC0602K 250mg TID vs Volixibat 5mg daily                                | 0 | No concerns   | Undetected | No concerns | Major concerns | No concerns    | No concerns | High quality     |
| MSDC0602K 250mg TID vs omega 3 PUFA (EPA 1050mg) daily                    | 0 | No concerns   | Undetected | No concerns | Major concerns | No concerns    | No concerns | High quality     |
| MSDC0602K 250mg TID vs omega 3 PUFA (EPA 2160mg) daily                    | 0 | No concerns   | Undetected | No concerns | Major concerns | No concerns    | No concerns | High quality     |

|                                                                            |   |               |            |             |                |                |             |                  |
|----------------------------------------------------------------------------|---|---------------|------------|-------------|----------------|----------------|-------------|------------------|
| MSDC0602K 250mg TID vs omega 3 PUFA (EPA 600mg) TID                        | 0 | No concerns   | Undetected | No concerns | Major concerns | No concerns    | No concerns | High quality     |
| MSDC0602K 250mg TID vs omega 3 PUFA (EPA 900mg) TID                        | 0 | No concerns   | Undetected | No concerns | Major concerns | No concerns    | No concerns | High quality     |
| MSDC0602K 62.5mg TID vs Obeticholic acid 10mg daily                        | 0 | No concerns   | Undetected | No concerns | Major concerns | No concerns    | No concerns | High quality     |
| MSDC0602K 62.5mg TID vs Obeticholic acid 25mg daily                        | 0 | No concerns   | Undetected | No concerns | Major concerns | No concerns    | No concerns | High quality     |
| MSDC0602K 62.5mg TID vs Pentoxifylline 400mg TID                           | 0 | No concerns   | Undetected | No concerns | No concerns    | Major concerns | No concerns | High quality     |
| MSDC0602K 62.5mg TID vs Pioglitazone 30mg daily                            | 0 | No concerns   | Undetected | No concerns | Major concerns | No concerns    | No concerns | High quality     |
| MSDC0602K 62.5mg TID vs Pioglitazone 45mg daily                            | 0 | No concerns   | Undetected | No concerns | No concerns    | Major concerns | No concerns | High quality     |
| MSDC0602K 62.5mg TID vs Resmetirom 80mg daily                              | 0 | No concerns   | Undetected | No concerns | Major concerns | No concerns    | No concerns | High quality     |
| MSDC0602K 62.5mg TID vs Saroglitazar 4mg daily                             | 0 | Some concerns | Undetected | No concerns | No concerns    | Major concerns | No concerns | Moderate quality |
| MSDC0602K 62.5mg TID vs Silymarin 420mg                                    | 0 | No concerns   | Undetected | No concerns | Major concerns | No concerns    | No concerns | High quality     |
| MSDC0602K 62.5mg TID vs Silymarin 700mg                                    | 0 | No concerns   | Undetected | No concerns | Major concerns | No concerns    | No concerns | High quality     |
| MSDC0602K 62.5mg TID vs Simtuzumab 125mg SQ weekly                         | 0 | No concerns   | Undetected | No concerns | Major concerns | No concerns    | No concerns | High quality     |
| MSDC0602K 62.5mg TID vs Simtuzumab 200mg IV every other week               | 0 | No concerns   | Undetected | No concerns | Major concerns | No concerns    | No concerns | High quality     |
| MSDC0602K 62.5mg TID vs Simtuzumab 700mg IV every other week               | 0 | No concerns   | Undetected | No concerns | Major concerns | No concerns    | No concerns | High quality     |
| MSDC0602K 62.5mg TID vs Simtuzumab 75mg SQ weekly                          | 0 | No concerns   | Undetected | No concerns | Major concerns | No concerns    | No concerns | High quality     |
| MSDC0602K 62.5mg TID vs Sitagliptin 100mg daily                            | 0 | Some concerns | Undetected | No concerns | Major concerns | No concerns    | No concerns | Moderate quality |
| MSDC0602K 62.5mg TID vs Telmisartan 40mg daily                             | 0 | Some concerns | Undetected | No concerns | Major concerns | No concerns    | No concerns | Moderate quality |
| MSDC0602K 62.5mg TID vs Vitamin E 800 IU daily                             | 0 | No concerns   | Undetected | No concerns | No concerns    | Major concerns | No concerns | High quality     |
| MSDC0602K 62.5mg TID vs Vitamin E 800 IU daily and Pioglitazone 45mg daily | 0 | No concerns   | Undetected | No concerns | No concerns    | Major concerns | No concerns | High quality     |
| MSDC0602K 62.5mg TID vs Volixibat 10mg daily                               | 0 | No concerns   | Undetected | No concerns | Major concerns | No concerns    | No concerns | High quality     |
| MSDC0602K 62.5mg TID vs Volixibat 20mg daily                               | 0 | No concerns   | Undetected | No concerns | Major concerns | No concerns    | No concerns | High quality     |
| MSDC0602K 62.5mg TID vs Volixibat 5mg daily                                | 0 | No concerns   | Undetected | No concerns | Major concerns | No concerns    | No concerns | High quality     |
| MSDC0602K 62.5mg TID vs omega 3 PUFA (EPA 1050mg) daily                    | 0 | No concerns   | Undetected | No concerns | Major concerns | No concerns    | No concerns | High quality     |
| MSDC0602K 62.5mg TID vs omega 3 PUFA (EPA 2160mg) daily                    | 0 | No concerns   | Undetected | No concerns | Major concerns | No concerns    | No concerns | High quality     |
| MSDC0602K 62.5mg TID vs omega 3 PUFA (EPA 600mg) TID                       | 0 | No concerns   | Undetected | No concerns | Major concerns | No concerns    | No concerns | High quality     |

|                                                                                   |   |               |            |             |                |                |             |                  |
|-----------------------------------------------------------------------------------|---|---------------|------------|-------------|----------------|----------------|-------------|------------------|
| MSDC0602K 62.5mg TID vs omega 3 PUFA (EPA 900mg) TID                              | 0 | No concerns   | Undetected | No concerns | Major concerns | No concerns    | No concerns | High quality     |
| Obeticholic acid 10mg daily vs Pentoxifylline 400mg TID                           | 0 | No concerns   | Undetected | No concerns | No concerns    | Major concerns | No concerns | High quality     |
| Obeticholic acid 10mg daily vs Pioglitazone 30mg daily                            | 0 | No concerns   | Undetected | No concerns | Major concerns | No concerns    | No concerns | High quality     |
| Obeticholic acid 10mg daily vs Pioglitazone 45mg daily                            | 0 | No concerns   | Undetected | No concerns | No concerns    | Major concerns | No concerns | High quality     |
| Obeticholic acid 10mg daily vs Resmetirom 80mg daily                              | 0 | No concerns   | Undetected | No concerns | Major concerns | No concerns    | No concerns | High quality     |
| Obeticholic acid 10mg daily vs Saroglitazar 4mg daily                             | 0 | Some concerns | Undetected | No concerns | Major concerns | No concerns    | No concerns | Moderate quality |
| Obeticholic acid 10mg daily vs Silymarin 420mg                                    | 0 | No concerns   | Undetected | No concerns | Major concerns | No concerns    | No concerns | High quality     |
| Obeticholic acid 10mg daily vs Silymarin 700mg                                    | 0 | No concerns   | Undetected | No concerns | Major concerns | No concerns    | No concerns | High quality     |
| Obeticholic acid 10mg daily vs Simtuzumab 125mg SQ weekly                         | 0 | No concerns   | Undetected | No concerns | Major concerns | No concerns    | No concerns | High quality     |
| Obeticholic acid 10mg daily vs Simtuzumab 200mg IV every other week               | 0 | No concerns   | Undetected | No concerns | Major concerns | No concerns    | No concerns | High quality     |
| Obeticholic acid 10mg daily vs Simtuzumab 700mg IV every other week               | 0 | No concerns   | Undetected | No concerns | Major concerns | No concerns    | No concerns | High quality     |
| Obeticholic acid 10mg daily vs Simtuzumab 75mg SQ weekly                          | 0 | No concerns   | Undetected | No concerns | Major concerns | No concerns    | No concerns | High quality     |
| Obeticholic acid 10mg daily vs Sitagliptin 100mg daily                            | 0 | Some concerns | Undetected | No concerns | Major concerns | No concerns    | No concerns | Moderate quality |
| Obeticholic acid 10mg daily vs Telmisartan 40mg daily                             | 0 | Some concerns | Undetected | No concerns | Major concerns | No concerns    | No concerns | Moderate quality |
| Obeticholic acid 10mg daily vs Vitamin E 800 IU daily                             | 0 | No concerns   | Undetected | No concerns | Major concerns | No concerns    | No concerns | High quality     |
| Obeticholic acid 10mg daily vs Vitamin E 800 IU daily and Pioglitazone 45mg daily | 0 | No concerns   | Undetected | No concerns | No concerns    | Major concerns | No concerns | High quality     |
| Obeticholic acid 10mg daily vs Volixibat 10mg daily                               | 0 | No concerns   | Undetected | No concerns | Major concerns | No concerns    | No concerns | High quality     |
| Obeticholic acid 10mg daily vs Volixibat 20mg daily                               | 0 | No concerns   | Undetected | No concerns | Major concerns | No concerns    | No concerns | High quality     |
| Obeticholic acid 10mg daily vs Volixibat 5mg daily                                | 0 | No concerns   | Undetected | No concerns | Major concerns | No concerns    | No concerns | High quality     |
| Obeticholic acid 10mg daily vs omega 3 PUFA (EPA 1050mg) daily                    | 0 | No concerns   | Undetected | No concerns | Major concerns | No concerns    | No concerns | High quality     |
| Obeticholic acid 10mg daily vs omega 3 PUFA (EPA 2160mg) daily                    | 0 | No concerns   | Undetected | No concerns | Major concerns | No concerns    | No concerns | High quality     |
| Obeticholic acid 10mg daily vs omega 3 PUFA (EPA 600mg) TID                       | 0 | No concerns   | Undetected | No concerns | Major concerns | No concerns    | No concerns | High quality     |
| Obeticholic acid 10mg daily vs omega 3 PUFA (EPA 900mg) TID                       | 0 | No concerns   | Undetected | No concerns | Major concerns | No concerns    | No concerns | High quality     |
| Obeticholic acid 25mg daily vs Pentoxifylline 400mg TID                           | 0 | No concerns   | Undetected | No concerns | Major concerns | No concerns    | No concerns | High quality     |
| Obeticholic acid 25mg daily vs Pioglitazone 30mg daily                            | 0 | No concerns   | Undetected | No concerns | Major concerns | No concerns    | No concerns | High quality     |



|                                                                                   |   |                |            |             |                |                |             |                  |
|-----------------------------------------------------------------------------------|---|----------------|------------|-------------|----------------|----------------|-------------|------------------|
| Obeticholic acid 25mg daily vs Pioglitazone 45mg daily                            | 0 | No concerns    | Undetected | No concerns | No concerns    | Major concerns | No concerns | High quality     |
| Obeticholic acid 25mg daily vs Resmetirom 80mg daily                              | 0 | No concerns    | Undetected | No concerns | Major concerns | No concerns    | No concerns | High quality     |
| Obeticholic acid 25mg daily vs Saroglitazar 4mg daily                             | 0 | Some concerns  | Undetected | No concerns | Major concerns | No concerns    | No concerns | Moderate quality |
| Obeticholic acid 25mg daily vs Silymarin 420mg                                    | 0 | No concerns    | Undetected | No concerns | Major concerns | No concerns    | No concerns | High quality     |
| Obeticholic acid 25mg daily vs Silymarin 700mg                                    | 0 | No concerns    | Undetected | No concerns | Major concerns | No concerns    | No concerns | High quality     |
| Obeticholic acid 25mg daily vs Simtuzumab 125mg SQ weekly                         | 0 | Some concerns  | Undetected | No concerns | Major concerns | No concerns    | No concerns | Moderate quality |
| Obeticholic acid 25mg daily vs Simtuzumab 200mg IV every other week               | 0 | Some concerns  | Undetected | No concerns | No concerns    | Major concerns | No concerns | Moderate quality |
| Obeticholic acid 25mg daily vs Simtuzumab 700mg IV every other week               | 0 | Some concerns  | Undetected | No concerns | No concerns    | Major concerns | No concerns | Moderate quality |
| Obeticholic acid 25mg daily vs Simtuzumab 75mg SQ weekly                          | 0 | Some concerns  | Undetected | No concerns | Major concerns | No concerns    | No concerns | Moderate quality |
| Obeticholic acid 25mg daily vs Sitagliptin 100mg daily                            | 0 | Some concerns  | Undetected | No concerns | Major concerns | No concerns    | No concerns | Moderate quality |
| Obeticholic acid 25mg daily vs Telmisartan 40mg daily                             | 0 | Some concerns  | Undetected | No concerns | Major concerns | No concerns    | No concerns | Moderate quality |
| Obeticholic acid 25mg daily vs Vitamin E 800 IU daily                             | 0 | No concerns    | Undetected | No concerns | Major concerns | No concerns    | No concerns | High quality     |
| Obeticholic acid 25mg daily vs Vitamin E 800 IU daily and Pioglitazone 45mg daily | 0 | No concerns    | Undetected | No concerns | No concerns    | Major concerns | No concerns | High quality     |
| Obeticholic acid 25mg daily vs Volixibat 10mg daily                               | 0 | No concerns    | Undetected | No concerns | Major concerns | No concerns    | No concerns | High quality     |
| Obeticholic acid 25mg daily vs Volixibat 20mg daily                               | 0 | No concerns    | Undetected | No concerns | Major concerns | No concerns    | No concerns | High quality     |
| Obeticholic acid 25mg daily vs Volixibat 5mg daily                                | 0 | No concerns    | Undetected | No concerns | Major concerns | No concerns    | No concerns | High quality     |
| Obeticholic acid 25mg daily vs omega 3 PUFA (EPA 1050mg) daily                    | 0 | No concerns    | Undetected | No concerns | Major concerns | No concerns    | No concerns | High quality     |
| Obeticholic acid 25mg daily vs omega 3 PUFA (EPA 2160mg) daily                    | 0 | No concerns    | Undetected | No concerns | Major concerns | No concerns    | No concerns | High quality     |
| Obeticholic acid 25mg daily vs omega 3 PUFA (EPA 600mg) TID                       | 0 | No concerns    | Undetected | No concerns | No concerns    | Major concerns | No concerns | High quality     |
| Obeticholic acid 25mg daily vs omega 3 PUFA (EPA 900mg) TID                       | 0 | No concerns    | Undetected | No concerns | No concerns    | Major concerns | No concerns | High quality     |
| Pentoxifylline 400mg TID vs Pioglitazone 30mg daily                               | 0 | No concerns    | Undetected | No concerns | Major concerns | No concerns    | No concerns | High quality     |
| Pentoxifylline 400mg TID vs Pioglitazone 45mg daily                               | 0 | Some concerns  | Undetected | No concerns | Major concerns | No concerns    | No concerns | Moderate quality |
| Pentoxifylline 400mg TID vs Resmetirom 80mg daily                                 | 0 | Some concerns  | Undetected | No concerns | Major concerns | No concerns    | No concerns | Moderate quality |
| Pentoxifylline 400mg TID vs Saroglitazar 4mg daily                                | 0 | Major concerns | Undetected | No concerns | Major concerns | No concerns    | No concerns | Low quality      |
| Pentoxifylline 400mg TID vs Silymarin 420mg                                       | 0 | No concerns    | Undetected | No concerns | Major concerns | No concerns    | No concerns | High quality     |

|                                                                                |   |                |            |             |                |                |             |                  |
|--------------------------------------------------------------------------------|---|----------------|------------|-------------|----------------|----------------|-------------|------------------|
| Pentoxifylline 400mg TID vs Silymarin 700mg                                    | 0 | No concerns    | Undetected | No concerns | Major concerns | No concerns    | No concerns | High quality     |
| Pentoxifylline 400mg TID vs Simtuzumab 125mg SQ weekly                         | 0 | Some concerns  | Undetected | No concerns | Major concerns | No concerns    | No concerns | Moderate quality |
| Pentoxifylline 400mg TID vs Simtuzumab 200mg IV every other week               | 0 | Some concerns  | Undetected | No concerns | No concerns    | Major concerns | No concerns | Moderate quality |
| Pentoxifylline 400mg TID vs Simtuzumab 700mg IV every other week               | 0 | Some concerns  | Undetected | No concerns | No concerns    | Major concerns | No concerns | Moderate quality |
| Pentoxifylline 400mg TID vs Simtuzumab 75mg SQ weekly                          | 0 | Some concerns  | Undetected | No concerns | Major concerns | No concerns    | No concerns | Moderate quality |
| Pentoxifylline 400mg TID vs Sitagliptin 100mg daily                            | 0 | Major concerns | Undetected | No concerns | Major concerns | No concerns    | No concerns | Low quality      |
| Pentoxifylline 400mg TID vs Telmisartan 40mg daily                             | 0 | Major concerns | Undetected | No concerns | Major concerns | No concerns    | No concerns | Low quality      |
| Pentoxifylline 400mg TID vs Vitamin E 800 IU daily                             | 0 | No concerns    | Undetected | No concerns | Major concerns | No concerns    | No concerns | High quality     |
| Pentoxifylline 400mg TID vs Vitamin E 800 IU daily and Pioglitazone 45mg daily | 0 | No concerns    | Undetected | No concerns | Major concerns | No concerns    | No concerns | High quality     |
| Pentoxifylline 400mg TID vs Volixibat 10mg daily                               | 0 | No concerns    | Undetected | No concerns | No concerns    | Major concerns | No concerns | High quality     |
| Pentoxifylline 400mg TID vs Volixibat 20mg daily                               | 0 | No concerns    | Undetected | No concerns | Major concerns | No concerns    | No concerns | High quality     |
| Pentoxifylline 400mg TID vs Volixibat 5mg daily                                | 0 | No concerns    | Undetected | No concerns | Major concerns | No concerns    | No concerns | High quality     |
| omega 3 PUFA (EPA 1050mg) daily vs Pentoxifylline 400mg TID                    | 0 | Some concerns  | Undetected | No concerns | Major concerns | No concerns    | No concerns | Moderate quality |
| omega 3 PUFA (EPA 2160mg) daily vs Pentoxifylline 400mg TID                    | 0 | Some concerns  | Undetected | No concerns | No concerns    | Major concerns | No concerns | Moderate quality |
| omega 3 PUFA (EPA 600mg) TID vs Pentoxifylline 400mg TID                       | 0 | No concerns    | Undetected | No concerns | No concerns    | Major concerns | No concerns | High quality     |
| omega 3 PUFA (EPA 900mg) TID vs Pentoxifylline 400mg TID                       | 0 | No concerns    | Undetected | No concerns | No concerns    | Major concerns | No concerns | High quality     |
| Pioglitazone 30mg daily vs Pioglitazone 45mg daily                             | 0 | No concerns    | Undetected | No concerns | Major concerns | No concerns    | No concerns | High quality     |
| Pioglitazone 30mg daily vs Resmetirom 80mg daily                               | 0 | No concerns    | Undetected | No concerns | Major concerns | No concerns    | No concerns | High quality     |
| Pioglitazone 30mg daily vs Saroglitazar 4mg daily                              | 0 | Some concerns  | Undetected | No concerns | Major concerns | No concerns    | No concerns | Moderate quality |
| Pioglitazone 30mg daily vs Silymarin 420mg                                     | 0 | No concerns    | Undetected | No concerns | Major concerns | No concerns    | No concerns | High quality     |
| Pioglitazone 30mg daily vs Silymarin 700mg                                     | 0 | No concerns    | Undetected | No concerns | Major concerns | No concerns    | No concerns | High quality     |
| Pioglitazone 30mg daily vs Simtuzumab 125mg SQ weekly                          | 0 | No concerns    | Undetected | No concerns | Major concerns | No concerns    | No concerns | High quality     |
| Pioglitazone 30mg daily vs Simtuzumab 200mg IV every other week                | 0 | No concerns    | Undetected | No concerns | Major concerns | No concerns    | No concerns | High quality     |
| Pioglitazone 30mg daily vs Simtuzumab 700mg IV every other week                | 0 | No concerns    | Undetected | No concerns | No concerns    | Major concerns | No concerns | High quality     |
| Pioglitazone 30mg daily vs Simtuzumab 75mg SQ weekly                           | 0 | No concerns    | Undetected | No concerns | Major concerns | No concerns    | No concerns | High quality     |



|                                                                               |   |               |            |             |                |                |             |                  |
|-------------------------------------------------------------------------------|---|---------------|------------|-------------|----------------|----------------|-------------|------------------|
| Pioglitazone 30mg daily vs Sitagliptin 100mg daily                            | 0 | Some concerns | Undetected | No concerns | Major concerns | No concerns    | No concerns | Moderate quality |
| Pioglitazone 30mg daily vs Telmisartan 40mg daily                             | 0 | Some concerns | Undetected | No concerns | Major concerns | No concerns    | No concerns | Moderate quality |
| Pioglitazone 30mg daily vs Vitamin E 800 IU daily and Pioglitazone 45mg daily | 0 | No concerns   | Undetected | No concerns | No concerns    | Major concerns | No concerns | High quality     |
| Pioglitazone 30mg daily vs Volixibat 10mg daily                               | 0 | No concerns   | Undetected | No concerns | Major concerns | No concerns    | No concerns | High quality     |
| Pioglitazone 30mg daily vs Volixibat 20mg daily                               | 0 | No concerns   | Undetected | No concerns | Major concerns | No concerns    | No concerns | High quality     |
| Pioglitazone 30mg daily vs Volixibat 5mg daily                                | 0 | No concerns   | Undetected | No concerns | Major concerns | No concerns    | No concerns | High quality     |
| omega 3 PUFA (EPA 1050mg) daily vs Pioglitazone 30mg daily                    | 0 | No concerns   | Undetected | No concerns | Major concerns | No concerns    | No concerns | High quality     |
| omega 3 PUFA (EPA 2160mg) daily vs Pioglitazone 30mg daily                    | 0 | No concerns   | Undetected | No concerns | Major concerns | No concerns    | No concerns | High quality     |
| omega 3 PUFA (EPA 600mg) TID vs Pioglitazone 30mg daily                       | 0 | No concerns   | Undetected | No concerns | Major concerns | No concerns    | No concerns | High quality     |
| omega 3 PUFA (EPA 900mg) TID vs Pioglitazone 30mg daily                       | 0 | No concerns   | Undetected | No concerns | Major concerns | No concerns    | No concerns | High quality     |
| Pioglitazone 45mg daily vs Resmetirom 80mg daily                              | 0 | No concerns   | Undetected | No concerns | Major concerns | No concerns    | No concerns | High quality     |
| Pioglitazone 45mg daily vs Saroglitazar 4mg daily                             | 0 | Some concerns | Undetected | No concerns | Major concerns | No concerns    | No concerns | Moderate quality |
| Pioglitazone 45mg daily vs Silymarin 420mg                                    | 0 | No concerns   | Undetected | No concerns | Major concerns | No concerns    | No concerns | High quality     |
| Pioglitazone 45mg daily vs Silymarin 700mg                                    | 0 | No concerns   | Undetected | No concerns | Major concerns | No concerns    | No concerns | High quality     |
| Pioglitazone 45mg daily vs Simtuzumab 125mg SQ weekly                         | 0 | Some concerns | Undetected | No concerns | Major concerns | No concerns    | No concerns | Moderate quality |
| Pioglitazone 45mg daily vs Simtuzumab 200mg IV every other week               | 0 | Some concerns | Undetected | No concerns | No concerns    | Major concerns | No concerns | Moderate quality |
| Pioglitazone 45mg daily vs Simtuzumab 700mg IV every other week               | 0 | Some concerns | Undetected | No concerns | No concerns    | Major concerns | No concerns | Moderate quality |
| Pioglitazone 45mg daily vs Simtuzumab 75mg SQ weekly                          | 0 | Some concerns | Undetected | No concerns | Major concerns | No concerns    | No concerns | Moderate quality |
| Pioglitazone 45mg daily vs Sitagliptin 100mg daily                            | 0 | Some concerns | Undetected | No concerns | Major concerns | No concerns    | No concerns | Moderate quality |
| Pioglitazone 45mg daily vs Telmisartan 40mg daily                             | 0 | Some concerns | Undetected | No concerns | Major concerns | No concerns    | No concerns | Moderate quality |
| Pioglitazone 45mg daily vs Vitamin E 800 IU daily                             | 0 | No concerns   | Undetected | No concerns | Major concerns | No concerns    | No concerns | High quality     |
| Pioglitazone 45mg daily vs Vitamin E 800 IU daily and Pioglitazone 45mg daily | 0 | No concerns   | Undetected | No concerns | Major concerns | No concerns    | No concerns | High quality     |
| Pioglitazone 45mg daily vs Volixibat 10mg daily                               | 0 | No concerns   | Undetected | No concerns | No concerns    | Major concerns | No concerns | High quality     |
| Pioglitazone 45mg daily vs Volixibat 20mg daily                               | 0 | No concerns   | Undetected | No concerns | Major concerns | No concerns    | No concerns | High quality     |
| Pioglitazone 45mg daily vs Volixibat 5mg daily                                | 0 | No concerns   | Undetected | No concerns | No concerns    | Major concerns | No concerns | High quality     |

|                                                                             |   |               |            |             |                |                |             |                  |
|-----------------------------------------------------------------------------|---|---------------|------------|-------------|----------------|----------------|-------------|------------------|
| omega 3 PUFA (EPA 1050mg) daily vs Pioglitazone 45mg daily                  | 0 | No concerns   | Undetected | No concerns | Major concerns | No concerns    | No concerns | High quality     |
| omega 3 PUFA (EPA 2160mg) daily vs Pioglitazone 45mg daily                  | 0 | No concerns   | Undetected | No concerns | No concerns    | Major concerns | No concerns | High quality     |
| omega 3 PUFA (EPA 600mg) TID vs Pioglitazone 45mg daily                     | 0 | No concerns   | Undetected | No concerns | No concerns    | Major concerns | No concerns | High quality     |
| omega 3 PUFA (EPA 900mg) TID vs Pioglitazone 45mg daily                     | 0 | No concerns   | Undetected | No concerns | No concerns    | Major concerns | No concerns | High quality     |
| Resmetirom 80mg daily vs Saroglitazar 4mg daily                             | 0 | Some concerns | Undetected | No concerns | Major concerns | No concerns    | No concerns | Moderate quality |
| Resmetirom 80mg daily vs Silymarin 420mg                                    | 0 | No concerns   | Undetected | No concerns | Major concerns | No concerns    | No concerns | High quality     |
| Resmetirom 80mg daily vs Silymarin 700mg                                    | 0 | No concerns   | Undetected | No concerns | Major concerns | No concerns    | No concerns | High quality     |
| Resmetirom 80mg daily vs Simtuzumab 125mg SQ weekly                         | 0 | Some concerns | Undetected | No concerns | Major concerns | No concerns    | No concerns | Moderate quality |
| Resmetirom 80mg daily vs Simtuzumab 200mg IV every other week               | 0 | Some concerns | Undetected | No concerns | Major concerns | No concerns    | No concerns | Moderate quality |
| Resmetirom 80mg daily vs Simtuzumab 700mg IV every other week               | 0 | Some concerns | Undetected | No concerns | No concerns    | Major concerns | No concerns | Moderate quality |
| Resmetirom 80mg daily vs Simtuzumab 75mg SQ weekly                          | 0 | Some concerns | Undetected | No concerns | Major concerns | No concerns    | No concerns | Moderate quality |
| Resmetirom 80mg daily vs Sitagliptin 100mg daily                            | 0 | Some concerns | Undetected | No concerns | Major concerns | No concerns    | No concerns | Moderate quality |
| Resmetirom 80mg daily vs Telmisartan 40mg daily                             | 0 | Some concerns | Undetected | No concerns | Major concerns | No concerns    | No concerns | Moderate quality |
| Resmetirom 80mg daily vs Vitamin E 800 IU daily                             | 0 | No concerns   | Undetected | No concerns | Major concerns | No concerns    | No concerns | High quality     |
| Resmetirom 80mg daily vs Vitamin E 800 IU daily and Pioglitazone 45mg daily | 0 | No concerns   | Undetected | No concerns | Major concerns | No concerns    | No concerns | High quality     |
| Resmetirom 80mg daily vs Volixibat 10mg daily                               | 0 | No concerns   | Undetected | No concerns | Major concerns | No concerns    | No concerns | High quality     |
| Resmetirom 80mg daily vs Volixibat 20mg daily                               | 0 | No concerns   | Undetected | No concerns | Major concerns | No concerns    | No concerns | High quality     |
| Resmetirom 80mg daily vs Volixibat 5mg daily                                | 0 | No concerns   | Undetected | No concerns | Major concerns | No concerns    | No concerns | High quality     |
| omega 3 PUFA (EPA 1050mg) daily vs Resmetirom 80mg daily                    | 0 | No concerns   | Undetected | No concerns | Major concerns | No concerns    | No concerns | High quality     |
| omega 3 PUFA (EPA 2160mg) daily vs Resmetirom 80mg daily                    | 0 | No concerns   | Undetected | No concerns | Major concerns | No concerns    | No concerns | High quality     |
| omega 3 PUFA (EPA 600mg) TID vs Resmetirom 80mg daily                       | 0 | No concerns   | Undetected | No concerns | Major concerns | No concerns    | No concerns | High quality     |
| omega 3 PUFA (EPA 900mg) TID vs Resmetirom 80mg daily                       | 0 | No concerns   | Undetected | No concerns | Major concerns | No concerns    | No concerns | High quality     |
| Saroglitazar 4mg daily vs Silymarin 420mg                                   | 0 | Some concerns | Undetected | No concerns | Major concerns | No concerns    | No concerns | Moderate quality |
| Saroglitazar 4mg daily vs Silymarin 700mg                                   | 0 | Some concerns | Undetected | No concerns | Major concerns | No concerns    | No concerns | Moderate quality |
| Saroglitazar 4mg daily vs Simtuzumab 125mg SQ weekly                        | 0 | Some concerns | Undetected | No concerns | Major concerns | No concerns    | No concerns | Moderate quality |
| Saroglitazar 4mg daily vs Simtuzumab 200mg IV every other week              | 0 | Some concerns | Undetected | No concerns | No concerns    | Major concerns | No concerns | Moderate quality |

|                                                                              |   |                |            |             |                |                |             |                  |
|------------------------------------------------------------------------------|---|----------------|------------|-------------|----------------|----------------|-------------|------------------|
| Saroglitazar 4mg daily vs Simtuzumab 700mg IV every other week               | 0 | Some concerns  | Undetected | No concerns | No concerns    | Major concerns | No concerns | Moderate quality |
| Saroglitazar 4mg daily vs Simtuzumab 75mg SQ weekly                          | 0 | Some concerns  | Undetected | No concerns | Major concerns | No concerns    | No concerns | Moderate quality |
| Saroglitazar 4mg daily vs Sitagliptin 100mg daily                            | 0 | Major concerns | Undetected | No concerns | Major concerns | No concerns    | No concerns | Low quality      |
| Saroglitazar 4mg daily vs Telmisartan 40mg daily                             | 0 | Major concerns | Undetected | No concerns | Major concerns | No concerns    | No concerns | Low quality      |
| Saroglitazar 4mg daily vs Vitamin E 800 IU daily                             | 0 | Some concerns  | Undetected | No concerns | Major concerns | No concerns    | No concerns | Moderate quality |
| Saroglitazar 4mg daily vs Vitamin E 800 IU daily and Pioglitazone 45mg daily | 0 | Some concerns  | Undetected | No concerns | Major concerns | No concerns    | No concerns | Moderate quality |
| Saroglitazar 4mg daily vs Volixibat 10mg daily                               | 0 | Some concerns  | Undetected | No concerns | Major concerns | No concerns    | No concerns | Moderate quality |
| Saroglitazar 4mg daily vs Volixibat 20mg daily                               | 0 | Some concerns  | Undetected | No concerns | Major concerns | No concerns    | No concerns | Moderate quality |
| Saroglitazar 4mg daily vs Volixibat 5mg daily                                | 0 | Some concerns  | Undetected | No concerns | Major concerns | No concerns    | No concerns | Moderate quality |
| omega 3 PUFA (EPA 1050mg) daily vs Saroglitazar 4mg daily                    | 0 | Some concerns  | Undetected | No concerns | Major concerns | No concerns    | No concerns | Moderate quality |
| omega 3 PUFA (EPA 2160mg) daily vs Saroglitazar 4mg daily                    | 0 | Some concerns  | Undetected | No concerns | Major concerns | No concerns    | No concerns | Moderate quality |
| omega 3 PUFA (EPA 600mg) TID vs Saroglitazar 4mg daily                       | 0 | Some concerns  | Undetected | No concerns | No concerns    | Major concerns | No concerns | Moderate quality |
| omega 3 PUFA (EPA 900mg) TID vs Saroglitazar 4mg daily                       | 0 | Some concerns  | Undetected | No concerns | No concerns    | Major concerns | No concerns | Moderate quality |
| Silymarin 420mg vs Simtuzumab 125mg SQ weekly                                | 0 | Some concerns  | Undetected | No concerns | Major concerns | No concerns    | No concerns | Moderate quality |
| Silymarin 420mg vs Simtuzumab 200mg IV every other week                      | 0 | No concerns    | Undetected | No concerns | Major concerns | No concerns    | No concerns | High quality     |
| Silymarin 420mg vs Simtuzumab 700mg IV every other week                      | 0 | No concerns    | Undetected | No concerns | Major concerns | No concerns    | No concerns | High quality     |
| Silymarin 420mg vs Simtuzumab 75mg SQ weekly                                 | 0 | Some concerns  | Undetected | No concerns | Major concerns | No concerns    | No concerns | Moderate quality |
| Silymarin 420mg vs Sitagliptin 100mg daily                                   | 0 | Some concerns  | Undetected | No concerns | Major concerns | No concerns    | No concerns | Moderate quality |
| Silymarin 420mg vs Telmisartan 40mg daily                                    | 0 | Some concerns  | Undetected | No concerns | Major concerns | No concerns    | No concerns | Moderate quality |
| Silymarin 420mg vs Vitamin E 800 IU daily                                    | 0 | No concerns    | Undetected | No concerns | Major concerns | No concerns    | No concerns | High quality     |
| Silymarin 420mg vs Vitamin E 800 IU daily and Pioglitazone 45mg daily        | 0 | No concerns    | Undetected | No concerns | Major concerns | No concerns    | No concerns | High quality     |
| Silymarin 420mg vs Volixibat 10mg daily                                      | 0 | No concerns    | Undetected | No concerns | Major concerns | No concerns    | No concerns | High quality     |
| Silymarin 420mg vs Volixibat 20mg daily                                      | 0 | No concerns    | Undetected | No concerns | Major concerns | No concerns    | No concerns | High quality     |
| Silymarin 420mg vs Volixibat 5mg daily                                       | 0 | No concerns    | Undetected | No concerns | Major concerns | No concerns    | No concerns | High quality     |
| omega 3 PUFA (EPA 1050mg) daily vs Silymarin 420mg                           | 0 | No concerns    | Undetected | No concerns | Major concerns | No concerns    | No concerns | High quality     |
| omega 3 PUFA (EPA 2160mg) daily vs Silymarin 420mg                           | 0 | No concerns    | Undetected | No concerns | Major concerns | No concerns    | No concerns | High quality     |
| omega 3 PUFA (EPA 600mg) TID vs Silymarin 420mg                              | 0 | No concerns    | Undetected | No concerns | Major concerns | No concerns    | No concerns | High quality     |

|                                                                                  |   |               |            |             |                |             |             |                  |
|----------------------------------------------------------------------------------|---|---------------|------------|-------------|----------------|-------------|-------------|------------------|
| omega 3 PUFA (EPA 900mg) TID vs Silymarin 420mg                                  | 0 | No concerns   | Undetected | No concerns | Major concerns | No concerns | No concerns | High quality     |
| Silymarin 700mg vs Simtuzumab 125mg SQ weekly                                    | 0 | Some concerns | Undetected | No concerns | Major concerns | No concerns | No concerns | Moderate quality |
| Silymarin 700mg vs Simtuzumab 200mg IV every other week                          | 0 | No concerns   | Undetected | No concerns | Major concerns | No concerns | No concerns | High quality     |
| Silymarin 700mg vs Simtuzumab 700mg IV every other week                          | 0 | No concerns   | Undetected | No concerns | Major concerns | No concerns | No concerns | High quality     |
| Silymarin 700mg vs Simtuzumab 75mg SQ weekly                                     | 0 | No concerns   | Undetected | No concerns | Major concerns | No concerns | No concerns | High quality     |
| Silymarin 700mg vs Sitagliptin 100mg daily                                       | 0 | Some concerns | Undetected | No concerns | Major concerns | No concerns | No concerns | Moderate quality |
| Silymarin 700mg vs Telmisartan 40mg daily                                        | 0 | Some concerns | Undetected | No concerns | Major concerns | No concerns | No concerns | Moderate quality |
| Silymarin 700mg vs Vitamin E 800 IU daily                                        | 0 | No concerns   | Undetected | No concerns | Major concerns | No concerns | No concerns | High quality     |
| Silymarin 700mg vs Vitamin E 800 IU daily and Pioglitazone 45mg daily            | 0 | No concerns   | Undetected | No concerns | Major concerns | No concerns | No concerns | High quality     |
| Silymarin 700mg vs Volixibat 10mg daily                                          | 0 | No concerns   | Undetected | No concerns | Major concerns | No concerns | No concerns | High quality     |
| Silymarin 700mg vs Volixibat 20mg daily                                          | 0 | No concerns   | Undetected | No concerns | Major concerns | No concerns | No concerns | High quality     |
| Silymarin 700mg vs Volixibat 5mg daily                                           | 0 | No concerns   | Undetected | No concerns | Major concerns | No concerns | No concerns | High quality     |
| omega 3 PUFA (EPA 1050mg) daily vs Silymarin 700mg                               | 0 | No concerns   | Undetected | No concerns | Major concerns | No concerns | No concerns | High quality     |
| omega 3 PUFA (EPA 2160mg) daily vs Silymarin 700mg                               | 0 | No concerns   | Undetected | No concerns | Major concerns | No concerns | No concerns | High quality     |
| omega 3 PUFA (EPA 600mg) TID vs Silymarin 700mg                                  | 0 | No concerns   | Undetected | No concerns | Major concerns | No concerns | No concerns | High quality     |
| omega 3 PUFA (EPA 900mg) TID vs Silymarin 700mg                                  | 0 | No concerns   | Undetected | No concerns | Major concerns | No concerns | No concerns | High quality     |
| Simtuzumab 125mg SQ weekly vs Simtuzumab 200mg IV every other week               | 0 | Some concerns | Undetected | No concerns | Major concerns | No concerns | No concerns | Moderate quality |
| Simtuzumab 125mg SQ weekly vs Simtuzumab 700mg IV every other week               | 0 | Some concerns | Undetected | No concerns | Major concerns | No concerns | No concerns | Moderate quality |
| Simtuzumab 125mg SQ weekly vs Sitagliptin 100mg daily                            | 0 | Some concerns | Undetected | No concerns | Major concerns | No concerns | No concerns | Moderate quality |
| Simtuzumab 125mg SQ weekly vs Telmisartan 40mg daily                             | 0 | Some concerns | Undetected | No concerns | Major concerns | No concerns | No concerns | Moderate quality |
| Simtuzumab 125mg SQ weekly vs Vitamin E 800 IU daily                             | 0 | No concerns   | Undetected | No concerns | Major concerns | No concerns | No concerns | High quality     |
| Simtuzumab 125mg SQ weekly vs Vitamin E 800 IU daily and Pioglitazone 45mg daily | 0 | No concerns   | Undetected | No concerns | Major concerns | No concerns | No concerns | High quality     |
| Simtuzumab 125mg SQ weekly vs Volixibat 10mg daily                               | 0 | No concerns   | Undetected | No concerns | Major concerns | No concerns | No concerns | High quality     |
| Simtuzumab 125mg SQ weekly vs Volixibat 20mg daily                               | 0 | No concerns   | Undetected | No concerns | Major concerns | No concerns | No concerns | High quality     |
| Simtuzumab 125mg SQ weekly vs Volixibat 5mg daily                                | 0 | No concerns   | Undetected | No concerns | Major concerns | No concerns | No concerns | High quality     |

|                                                                                            |   |               |            |             |                |                |             |                  |
|--------------------------------------------------------------------------------------------|---|---------------|------------|-------------|----------------|----------------|-------------|------------------|
| omega 3 PUFA (EPA 1050mg) daily vs Simtuzumab 125mg SQ weekly                              | 0 | Some concerns | Undetected | No concerns | Major concerns | No concerns    | No concerns | Moderate quality |
| omega 3 PUFA (EPA 2160mg) daily vs Simtuzumab 125mg SQ weekly                              | 0 | Some concerns | Undetected | No concerns | Major concerns | No concerns    | No concerns | Moderate quality |
| omega 3 PUFA (EPA 600mg) TID vs Simtuzumab 125mg SQ weekly                                 | 0 | Some concerns | Undetected | No concerns | Major concerns | No concerns    | No concerns | Moderate quality |
| omega 3 PUFA (EPA 900mg) TID vs Simtuzumab 125mg SQ weekly                                 | 0 | Some concerns | Undetected | No concerns | Major concerns | No concerns    | No concerns | Moderate quality |
| Simtuzumab 200mg IV every other week vs Simtuzumab 75mg SQ weekly                          | 0 | Some concerns | Undetected | No concerns | Major concerns | No concerns    | No concerns | Moderate quality |
| Simtuzumab 200mg IV every other week vs Sitagliptin 100mg daily                            | 0 | Some concerns | Undetected | No concerns | No concerns    | Major concerns | No concerns | Moderate quality |
| Simtuzumab 200mg IV every other week vs Telmisartan 40mg daily                             | 0 | Some concerns | Undetected | No concerns | No concerns    | Major concerns | No concerns | Moderate quality |
| Simtuzumab 200mg IV every other week vs Vitamin E 800 IU daily                             | 0 | No concerns   | Undetected | No concerns | No concerns    | Major concerns | No concerns | High quality     |
| Simtuzumab 200mg IV every other week vs Vitamin E 800 IU daily and Pioglitazone 45mg daily | 0 | No concerns   | Undetected | No concerns | No concerns    | Major concerns | No concerns | High quality     |
| Simtuzumab 200mg IV every other week vs Volixibat 10mg daily                               | 0 | No concerns   | Undetected | No concerns | Major concerns | No concerns    | No concerns | High quality     |
| Simtuzumab 200mg IV every other week vs Volixibat 20mg daily                               | 0 | No concerns   | Undetected | No concerns | Major concerns | No concerns    | No concerns | High quality     |
| Simtuzumab 200mg IV every other week vs Volixibat 5mg daily                                | 0 | No concerns   | Undetected | No concerns | Major concerns | No concerns    | No concerns | High quality     |
| omega 3 PUFA (EPA 1050mg) daily vs Simtuzumab 200mg IV every other week                    | 0 | Some concerns | Undetected | No concerns | Major concerns | No concerns    | No concerns | Moderate quality |
| omega 3 PUFA (EPA 2160mg) daily vs Simtuzumab 200mg IV every other week                    | 0 | Some concerns | Undetected | No concerns | Major concerns | No concerns    | No concerns | Moderate quality |
| omega 3 PUFA (EPA 600mg) TID vs Simtuzumab 200mg IV every other week                       | 0 | No concerns   | Undetected | No concerns | Major concerns | No concerns    | No concerns | High quality     |
| omega 3 PUFA (EPA 900mg) TID vs Simtuzumab 200mg IV every other week                       | 0 | No concerns   | Undetected | No concerns | Major concerns | No concerns    | No concerns | High quality     |
| Simtuzumab 700mg IV every other week vs Simtuzumab 75mg SQ weekly                          | 0 | Some concerns | Undetected | No concerns | No concerns    | Major concerns | No concerns | Moderate quality |
| Simtuzumab 700mg IV every other week vs Sitagliptin 100mg daily                            | 0 | Some concerns | Undetected | No concerns | No concerns    | Major concerns | No concerns | Moderate quality |
| Simtuzumab 700mg IV every other week vs Telmisartan 40mg daily                             | 0 | Some concerns | Undetected | No concerns | No concerns    | Major concerns | No concerns | Moderate quality |
| Simtuzumab 700mg IV every other week vs Vitamin E 800 IU daily                             | 0 | No concerns   | Undetected | No concerns | No concerns    | Major concerns | No concerns | High quality     |
| Simtuzumab 700mg IV every other week vs Vitamin E 800 IU daily and Pioglitazone 45mg daily | 0 | No concerns   | Undetected | No concerns | No concerns    | Major concerns | No concerns | High quality     |
| Simtuzumab 700mg IV every other week vs Volixibat 10mg daily                               | 0 | No concerns   | Undetected | No concerns | Major concerns | No concerns    | No concerns | High quality     |
| Simtuzumab 700mg IV every other week vs Volixibat 20mg daily                               | 0 | No concerns   | Undetected | No concerns | Major concerns | No concerns    | No concerns | High quality     |

|                                                                                 |   |                |            |             |                |                |             |                  |
|---------------------------------------------------------------------------------|---|----------------|------------|-------------|----------------|----------------|-------------|------------------|
| Simtuzumab 700mg IV every other week vs Volixibat 5mg daily                     | 0 | No concerns    | Undetected | No concerns | Major concerns | No concerns    | No concerns | High quality     |
| omega 3 PUFA (EPA 1050mg) daily vs Simtuzumab 700mg IV every other week         | 0 | Some concerns  | Undetected | No concerns | Major concerns | No concerns    | No concerns | Moderate quality |
| omega 3 PUFA (EPA 2160mg) daily vs Simtuzumab 700mg IV every other week         | 0 | Some concerns  | Undetected | No concerns | Major concerns | No concerns    | No concerns | Moderate quality |
| omega 3 PUFA (EPA 600mg) TID vs Simtuzumab 700mg IV every other week            | 0 | No concerns    | Undetected | No concerns | Major concerns | No concerns    | No concerns | High quality     |
| omega 3 PUFA (EPA 900mg) TID vs Simtuzumab 700mg IV every other week            | 0 | Some concerns  | Undetected | No concerns | Major concerns | No concerns    | No concerns | Moderate quality |
| Simtuzumab 75mg SQ weekly vs Sitagliptin 100mg daily                            | 0 | Some concerns  | Undetected | No concerns | Major concerns | No concerns    | No concerns | Moderate quality |
| Simtuzumab 75mg SQ weekly vs Telmisartan 40mg daily                             | 0 | Some concerns  | Undetected | No concerns | Major concerns | No concerns    | No concerns | Moderate quality |
| Simtuzumab 75mg SQ weekly vs Vitamin E 800 IU daily                             | 0 | No concerns    | Undetected | No concerns | Major concerns | No concerns    | No concerns | High quality     |
| Simtuzumab 75mg SQ weekly vs Vitamin E 800 IU daily and Pioglitazone 45mg daily | 0 | No concerns    | Undetected | No concerns | Major concerns | No concerns    | No concerns | High quality     |
| Simtuzumab 75mg SQ weekly vs Volixibat 10mg daily                               | 0 | No concerns    | Undetected | No concerns | Major concerns | No concerns    | No concerns | High quality     |
| Simtuzumab 75mg SQ weekly vs Volixibat 20mg daily                               | 0 | No concerns    | Undetected | No concerns | Major concerns | No concerns    | No concerns | High quality     |
| Simtuzumab 75mg SQ weekly vs Volixibat 5mg daily                                | 0 | No concerns    | Undetected | No concerns | Major concerns | No concerns    | No concerns | High quality     |
| omega 3 PUFA (EPA 1050mg) daily vs Simtuzumab 75mg SQ weekly                    | 0 | Some concerns  | Undetected | No concerns | Major concerns | No concerns    | No concerns | Moderate quality |
| omega 3 PUFA (EPA 2160mg) daily vs Simtuzumab 75mg SQ weekly                    | 0 | Some concerns  | Undetected | No concerns | Major concerns | No concerns    | No concerns | Moderate quality |
| omega 3 PUFA (EPA 600mg) TID vs Simtuzumab 75mg SQ weekly                       | 0 | Some concerns  | Undetected | No concerns | Major concerns | No concerns    | No concerns | Moderate quality |
| omega 3 PUFA (EPA 900mg) TID vs Simtuzumab 75mg SQ weekly                       | 0 | Some concerns  | Undetected | No concerns | Major concerns | No concerns    | No concerns | Moderate quality |
| Sitagliptin 100mg daily vs Telmisartan 40mg daily                               | 0 | Major concerns | Undetected | No concerns | Major concerns | No concerns    | No concerns | Low quality      |
| Sitagliptin 100mg daily vs Vitamin E 800 IU daily                               | 0 | Some concerns  | Undetected | No concerns | Major concerns | No concerns    | No concerns | Moderate quality |
| Sitagliptin 100mg daily vs Vitamin E 800 IU daily and Pioglitazone 45mg daily   | 0 | Some concerns  | Undetected | No concerns | Major concerns | No concerns    | No concerns | Moderate quality |
| Sitagliptin 100mg daily vs Volixibat 10mg daily                                 | 0 | Some concerns  | Undetected | No concerns | No concerns    | Major concerns | No concerns | Moderate quality |
| Sitagliptin 100mg daily vs Volixibat 20mg daily                                 | 0 | Some concerns  | Undetected | No concerns | Major concerns | No concerns    | No concerns | Moderate quality |
| Sitagliptin 100mg daily vs Volixibat 5mg daily                                  | 0 | Some concerns  | Undetected | No concerns | Major concerns | No concerns    | No concerns | Moderate quality |
| omega 3 PUFA (EPA 1050mg) daily vs Sitagliptin 100mg daily                      | 0 | Some concerns  | Undetected | No concerns | Major concerns | No concerns    | No concerns | Moderate quality |

|                                                                                       |   |               |            |             |                |                |             |                  |
|---------------------------------------------------------------------------------------|---|---------------|------------|-------------|----------------|----------------|-------------|------------------|
| omega 3 PUFA (EPA 2160mg) daily vs Sitagliptin 100mg daily                            | 0 | Some concerns | Undetected | No concerns | Major concerns | No concerns    | No concerns | Moderate quality |
| omega 3 PUFA (EPA 600mg) TID vs Sitagliptin 100mg daily                               | 0 | Some concerns | Undetected | No concerns | No concerns    | Major concerns | No concerns | Moderate quality |
| omega 3 PUFA (EPA 900mg) TID vs Sitagliptin 100mg daily                               | 0 | Some concerns | Undetected | No concerns | No concerns    | Major concerns | No concerns | Moderate quality |
| Telmisartan 40mg daily vs Vitamin E 800 IU daily                                      | 0 | Some concerns | Undetected | No concerns | Major concerns | No concerns    | No concerns | Moderate quality |
| Telmisartan 40mg daily vs Vitamin E 800 IU daily and Pioglitazone 45mg daily          | 0 | Some concerns | Undetected | No concerns | Major concerns | No concerns    | No concerns | Moderate quality |
| Telmisartan 40mg daily vs Volixibat 10mg daily                                        | 0 | Some concerns | Undetected | No concerns | No concerns    | Major concerns | No concerns | Moderate quality |
| Telmisartan 40mg daily vs Volixibat 20mg daily                                        | 0 | Some concerns | Undetected | No concerns | Major concerns | No concerns    | No concerns | Moderate quality |
| Telmisartan 40mg daily vs Volixibat 5mg daily                                         | 0 | Some concerns | Undetected | No concerns | Major concerns | No concerns    | No concerns | Moderate quality |
| omega 3 PUFA (EPA 1050mg) daily vs Telmisartan 40mg daily                             | 0 | Some concerns | Undetected | No concerns | Major concerns | No concerns    | No concerns | Moderate quality |
| omega 3 PUFA (EPA 2160mg) daily vs Telmisartan 40mg daily                             | 0 | Some concerns | Undetected | No concerns | Major concerns | No concerns    | No concerns | Moderate quality |
| omega 3 PUFA (EPA 600mg) TID vs Telmisartan 40mg daily                                | 0 | Some concerns | Undetected | No concerns | Major concerns | No concerns    | No concerns | Moderate quality |
| omega 3 PUFA (EPA 900mg) TID vs Telmisartan 40mg daily                                | 0 | Some concerns | Undetected | No concerns | Major concerns | No concerns    | No concerns | Moderate quality |
| Vitamin E 800 IU daily vs Volixibat 10mg daily                                        | 0 | No concerns   | Undetected | No concerns | Major concerns | No concerns    | No concerns | High quality     |
| Vitamin E 800 IU daily vs Volixibat 20mg daily                                        | 0 | No concerns   | Undetected | No concerns | Major concerns | No concerns    | No concerns | High quality     |
| Vitamin E 800 IU daily vs Volixibat 5mg daily                                         | 0 | No concerns   | Undetected | No concerns | Major concerns | No concerns    | No concerns | High quality     |
| omega 3 PUFA (EPA 1050mg) daily vs Vitamin E 800 IU daily                             | 0 | No concerns   | Undetected | No concerns | Major concerns | No concerns    | No concerns | High quality     |
| omega 3 PUFA (EPA 2160mg) daily vs Vitamin E 800 IU daily                             | 0 | No concerns   | Undetected | No concerns | Major concerns | No concerns    | No concerns | High quality     |
| omega 3 PUFA (EPA 600mg) TID vs Vitamin E 800 IU daily                                | 0 | No concerns   | Undetected | No concerns | No concerns    | Major concerns | No concerns | High quality     |
| omega 3 PUFA (EPA 900mg) TID vs Vitamin E 800 IU daily                                | 0 | No concerns   | Undetected | No concerns | No concerns    | Major concerns | No concerns | High quality     |
| Vitamin E 800 IU daily and Pioglitazone 45mg daily vs Volixibat 10mg daily            | 0 | No concerns   | Undetected | No concerns | No concerns    | Major concerns | No concerns | High quality     |
| Vitamin E 800 IU daily and Pioglitazone 45mg daily vs Volixibat 20mg daily            | 0 | No concerns   | Undetected | No concerns | Major concerns | No concerns    | No concerns | High quality     |
| Vitamin E 800 IU daily and Pioglitazone 45mg daily vs Volixibat 5mg daily             | 0 | No concerns   | Undetected | No concerns | No concerns    | Major concerns | No concerns | High quality     |
| omega 3 PUFA (EPA 1050mg) daily vs Vitamin E 800 IU daily and Pioglitazone 45mg daily | 0 | No concerns   | Undetected | No concerns | Major concerns | No concerns    | No concerns | High quality     |
| omega 3 PUFA (EPA 2160mg) daily vs Vitamin E 800 IU daily and Pioglitazone 45mg daily | 0 | No concerns   | Undetected | No concerns | No concerns    | Major concerns | No concerns | High quality     |



|                                                                                    |                          |                          |                       |                     |                    |                      |                    |                          |
|------------------------------------------------------------------------------------|--------------------------|--------------------------|-----------------------|---------------------|--------------------|----------------------|--------------------|--------------------------|
| omega 3 PUFA (EPA 600mg) TID vs Vitamin E 800 IU daily and Pioglitazone 45mg daily | 0                        | No concerns              | Undetected            | No concerns         | No concerns        | Major concerns       | No concerns        | High quality             |
| omega 3 PUFA (EPA 900mg) TID vs Vitamin E 800 IU daily and Pioglitazone 45mg daily | 0                        | No concerns              | Undetected            | No concerns         | No concerns        | Major concerns       | No concerns        | High quality             |
| omega 3 PUFA (EPA 1050mg) daily vs Volixibat 10mg daily                            | 0                        | No concerns              | Undetected            | No concerns         | Major concerns     | No concerns          | No concerns        | High quality             |
| omega 3 PUFA (EPA 2160mg) daily vs Volixibat 10mg daily                            | 0                        | No concerns              | Undetected            | No concerns         | Major concerns     | No concerns          | No concerns        | High quality             |
| omega 3 PUFA (EPA 600mg) TID vs Volixibat 10mg daily                               | 0                        | No concerns              | Undetected            | No concerns         | Major concerns     | No concerns          | No concerns        | High quality             |
| omega 3 PUFA (EPA 900mg) TID vs Volixibat 10mg daily                               | 0                        | No concerns              | Undetected            | No concerns         | Major concerns     | No concerns          | No concerns        | High quality             |
| omega 3 PUFA (EPA 1050mg) daily vs Volixibat 20mg daily                            | 0                        | No concerns              | Undetected            | No concerns         | Major concerns     | No concerns          | No concerns        | High quality             |
| omega 3 PUFA (EPA 2160mg) daily vs Volixibat 20mg daily                            | 0                        | No concerns              | Undetected            | No concerns         | Major concerns     | No concerns          | No concerns        | High quality             |
| omega 3 PUFA (EPA 600mg) TID vs Volixibat 20mg daily                               | 0                        | No concerns              | Undetected            | No concerns         | Major concerns     | No concerns          | No concerns        | High quality             |
| omega 3 PUFA (EPA 900mg) TID vs Volixibat 20mg daily                               | 0                        | No concerns              | Undetected            | No concerns         | Major concerns     | No concerns          | No concerns        | High quality             |
| omega 3 PUFA (EPA 1050mg) daily vs Volixibat 5mg daily                             | 0                        | No concerns              | Undetected            | No concerns         | Major concerns     | No concerns          | No concerns        | High quality             |
| omega 3 PUFA (EPA 2160mg) daily vs Volixibat 5mg daily                             | 0                        | No concerns              | Undetected            | No concerns         | Major concerns     | No concerns          | No concerns        | High quality             |
| omega 3 PUFA (EPA 600mg) TID vs Volixibat 5mg daily                                | 0                        | No concerns              | Undetected            | No concerns         | Major concerns     | No concerns          | No concerns        | High quality             |
| omega 3 PUFA (EPA 900mg) TID vs Volixibat 5mg daily                                | 0                        | No concerns              | Undetected            | No concerns         | Major concerns     | No concerns          | No concerns        | High quality             |
| omega 3 PUFA (EPA 1050mg) daily vs omega 3 PUFA (EPA 2160mg) daily                 | 0                        | No concerns              | Undetected            | No concerns         | Major concerns     | No concerns          | No concerns        | High quality             |
| omega 3 PUFA (EPA 1050mg) daily vs omega 3 PUFA (EPA 600mg) TID                    | 0                        | No concerns              | Undetected            | No concerns         | Major concerns     | No concerns          | No concerns        | High quality             |
| omega 3 PUFA (EPA 1050mg) daily vs omega 3 PUFA (EPA 900mg) TID                    | 0                        | No concerns              | Undetected            | No concerns         | Major concerns     | No concerns          | No concerns        | High quality             |
| omega 3 PUFA (EPA 2160mg) daily vs omega 3 PUFA (EPA 600mg) TID                    | 0                        | No concerns              | Undetected            | No concerns         | Major concerns     | No concerns          | No concerns        | High quality             |
| omega 3 PUFA (EPA 2160mg) daily vs omega 3 PUFA (EPA 900mg) TID                    | 0                        | No concerns              | Undetected            | No concerns         | Major concerns     | No concerns          | No concerns        | High quality             |
| <b><u>NASH resolution without worsening fibrosis</u></b>                           |                          |                          |                       |                     |                    |                      |                    |                          |
| <b>Comparison</b>                                                                  | <b>Number of studies</b> | <b>Within-study bias</b> | <b>Reporting bias</b> | <b>Indirectness</b> | <b>Imprecision</b> | <b>Heterogeneity</b> | <b>Incoherence</b> | <b>Confidence rating</b> |
| Aldafermin 1mg SQ daily vs Placebo                                                 | 1                        | No concerns              | Undetected            | No concerns         | No concerns        | Major concerns       | No concerns        | High quality             |
| Elafibranor 120 mg daily vs Elafibranor 80 mg daily                                | 1                        | No concerns              | Suspected             | No concerns         | Major concerns     | No concerns          | No concerns        | Low quality              |
| Elafibranor 120 mg daily vs Placebo                                                | 1                        | No concerns              | Suspected             | No concerns         | Major concerns     | No concerns          | No concerns        | Low quality              |
| Elafibranor 80 mg daily vs Placebo                                                 | 1                        | No concerns              | Suspected             | No concerns         | Major concerns     | No concerns          | No concerns        | Low quality              |
| Emricasan 50mg BID vs Emricasan 5mg BID                                            | 1                        | No concerns              | Undetected            | No concerns         | Major concerns     | No concerns          | No concerns        | High quality             |



|                                                                              |   |               |            |             |                |                |             |              |
|------------------------------------------------------------------------------|---|---------------|------------|-------------|----------------|----------------|-------------|--------------|
| Emricasan 50mg BID vs Placebo                                                | 1 | No concerns   | Undetected | No concerns | Major concerns | No concerns    | No concerns | High quality |
| Emricasan 5mg BID vs Placebo                                                 | 1 | No concerns   | Undetected | No concerns | Major concerns | No concerns    | No concerns | High quality |
| Liraglutide 1.8mg daily vs Placebo                                           | 1 | No concerns   | Suspected  | No concerns | No concerns    | Major concerns | No concerns | Low quality  |
| MSDC0602K 125mg TID vs MSDC0602K 250mg TID                                   | 1 | No concerns   | Undetected | No concerns | Major concerns | No concerns    | No concerns | High quality |
| MSDC0602K 125mg TID vs MSDC0602K 62.5mg TID                                  | 1 | No concerns   | Undetected | No concerns | Major concerns | No concerns    | No concerns | High quality |
| MSDC0602K 125mg TID vs Placebo                                               | 1 | No concerns   | Undetected | No concerns | Major concerns | No concerns    | No concerns | High quality |
| MSDC0602K 250mg TID vs MSDC0602K 62.5mg TID                                  | 1 | No concerns   | Undetected | No concerns | Major concerns | No concerns    | No concerns | High quality |
| MSDC0602K 250mg TID vs Placebo                                               | 1 | No concerns   | Undetected | No concerns | Major concerns | No concerns    | No concerns | High quality |
| MSDC0602K 62.5mg TID vs Placebo                                              | 1 | No concerns   | Undetected | No concerns | Major concerns | No concerns    | No concerns | High quality |
| Obeticholic acid 10mg daily vs Obeticholic acid 25mg daily                   | 1 | No concerns   | Undetected | No concerns | Major concerns | No concerns    | No concerns | High quality |
| Obeticholic acid 10mg daily vs Placebo                                       | 1 | No concerns   | Undetected | No concerns | Major concerns | No concerns    | No concerns | High quality |
| Obeticholic acid 25mg daily vs Placebo                                       | 2 | No concerns   | Undetected | No concerns | No concerns    | Major concerns | No concerns | High quality |
| Pioglitazone 30mg daily vs Placebo                                           | 1 | No concerns   | Undetected | No concerns | No concerns    | No concerns    | No concerns | High quality |
| Pioglitazone 30mg daily vs Vitamin E 800 IU daily                            | 1 | No concerns   | Undetected | No concerns | Major concerns | No concerns    | No concerns | High quality |
| Pioglitazone 45mg daily vs Placebo                                           | 1 | No concerns   | Undetected | No concerns | No concerns    | Major concerns | No concerns | High quality |
| Placebo vs Resmetirom 80mg daily                                             | 1 | No concerns   | Suspected  | No concerns | Major concerns | No concerns    | No concerns | Low quality  |
| Placebo vs Selonsertib 18mg daily                                            | 2 | No concerns   | Undetected | No concerns | No concerns    | Major concerns | No concerns | High quality |
| Placebo vs Selonsertib 6mg daily                                             | 2 | No concerns   | Undetected | No concerns | Major concerns | No concerns    | No concerns | High quality |
| Placebo vs Simtuzumab 125mg SQ weekly                                        | 1 | Some concerns | Suspected  | No concerns | Major concerns | No concerns    | No concerns | Low quality  |
| Placebo vs Simtuzumab 200mg IV every other week                              | 1 | Some concerns | Suspected  | No concerns | Major concerns | No concerns    | No concerns | Low quality  |
| Placebo vs Simtuzumab 700mg IV every other week                              | 1 | Some concerns | Suspected  | No concerns | Major concerns | No concerns    | No concerns | Low quality  |
| Placebo vs Simtuzumab 75mg SQ weekly                                         | 1 | Some concerns | Suspected  | No concerns | Major concerns | No concerns    | No concerns | Low quality  |
| Placebo vs Vitamin E 800 IU daily                                            | 2 | No concerns   | Undetected | No concerns | No concerns    | Major concerns | No concerns | High quality |
| Placebo vs Vitamin E 800 IU daily and Pioglitazone 45mg daily                | 1 | No concerns   | Undetected | No concerns | No concerns    | Major concerns | No concerns | High quality |
| Placebo vs Volixibat 10mg daily                                              | 1 | No concerns   | Undetected | No concerns | Major concerns | No concerns    | No concerns | High quality |
| Placebo vs Volixibat 20mg daily                                              | 1 | No concerns   | Undetected | No concerns | Major concerns | No concerns    | No concerns | High quality |
| Placebo vs Volixibat 5mg daily                                               | 1 | No concerns   | Undetected | No concerns | Major concerns | No concerns    | No concerns | High quality |
| Selonsertib 18mg daily vs Selonsertib 6mg daily                              | 2 | No concerns   | Undetected | No concerns | Major concerns | No concerns    | No concerns | High quality |
| Simtuzumab 125mg SQ weekly vs Simtuzumab 75mg SQ weekly                      | 1 | Some concerns | Suspected  | No concerns | Major concerns | No concerns    | No concerns | Low quality  |
| Simtuzumab 200mg IV every other week vs Simtuzumab 700mg IV every other week | 1 | Some concerns | Suspected  | No concerns | Major concerns | No concerns    | No concerns | Low quality  |
| Vitamin E 800 IU daily vs Vitamin E 800 IU daily and Pioglitazone 45mg daily | 1 | No concerns   | Undetected | No concerns | Major concerns | No concerns    | No concerns | High quality |

|                                                                               |   |               |            |             |                |                |             |                  |
|-------------------------------------------------------------------------------|---|---------------|------------|-------------|----------------|----------------|-------------|------------------|
| Volixibat 10mg daily vs Volixibat 20mg daily                                  | 1 | No concerns   | Undetected | No concerns | Major concerns | No concerns    | No concerns | High quality     |
| Volixibat 10mg daily vs Volixibat 5mg daily                                   | 1 | No concerns   | Undetected | No concerns | Major concerns | No concerns    | No concerns | High quality     |
| Volixibat 20mg daily vs Volixibat 5mg daily                                   | 1 | No concerns   | Undetected | No concerns | Major concerns | No concerns    | No concerns | High quality     |
| Aldafermin 1mg SQ daily vs Elafibranor 120 mg daily                           | 0 | No concerns   | Undetected | No concerns | Major concerns | No concerns    | No concerns | High quality     |
| Aldafermin 1mg SQ daily vs Elafibranor 80 mg daily                            | 0 | No concerns   | Undetected | No concerns | No concerns    | Major concerns | No concerns | High quality     |
| Aldafermin 1mg SQ daily vs Emricasan 50mg BID                                 | 0 | No concerns   | Undetected | No concerns | No concerns    | Major concerns | No concerns | High quality     |
| Aldafermin 1mg SQ daily vs Emricasan 5mg BID                                  | 0 | No concerns   | Undetected | No concerns | No concerns    | Major concerns | No concerns | High quality     |
| Aldafermin 1mg SQ daily vs Liraglutide 1.8mg daily                            | 0 | No concerns   | Undetected | No concerns | Major concerns | No concerns    | No concerns | High quality     |
| Aldafermin 1mg SQ daily vs MSDC0602K 125mg TID                                | 0 | No concerns   | Undetected | No concerns | Major concerns | No concerns    | No concerns | High quality     |
| Aldafermin 1mg SQ daily vs MSDC0602K 250mg TID                                | 0 | No concerns   | Undetected | No concerns | Major concerns | No concerns    | No concerns | High quality     |
| Aldafermin 1mg SQ daily vs MSDC0602K 62.5mg TID                               | 0 | No concerns   | Undetected | No concerns | No concerns    | Major concerns | No concerns | High quality     |
| Aldafermin 1mg SQ daily vs Obeticholic acid 10mg daily                        | 0 | No concerns   | Undetected | No concerns | Major concerns | No concerns    | No concerns | High quality     |
| Aldafermin 1mg SQ daily vs Obeticholic acid 25mg daily                        | 0 | No concerns   | Undetected | No concerns | Major concerns | No concerns    | No concerns | High quality     |
| Aldafermin 1mg SQ daily vs Pioglitazone 30mg daily                            | 0 | No concerns   | Undetected | No concerns | Major concerns | No concerns    | No concerns | High quality     |
| Aldafermin 1mg SQ daily vs Pioglitazone 45mg daily                            | 0 | No concerns   | Undetected | No concerns | Major concerns | No concerns    | No concerns | High quality     |
| Aldafermin 1mg SQ daily vs Resmetirom 80mg daily                              | 0 | No concerns   | Undetected | No concerns | Major concerns | No concerns    | No concerns | High quality     |
| Aldafermin 1mg SQ daily vs Selonsertib 18mg daily                             | 0 | No concerns   | Undetected | No concerns | No concerns    | Major concerns | No concerns | High quality     |
| Aldafermin 1mg SQ daily vs Selonsertib 6mg daily                              | 0 | No concerns   | Undetected | No concerns | No concerns    | Major concerns | No concerns | High quality     |
| Aldafermin 1mg SQ daily vs Simtuzumab 125mg SQ weekly                         | 0 | Some concerns | Undetected | No concerns | Major concerns | No concerns    | No concerns | Moderate quality |
| Aldafermin 1mg SQ daily vs Simtuzumab 200mg IV every other week               | 0 | Some concerns | Undetected | No concerns | No concerns    | Major concerns | No concerns | Moderate quality |
| Aldafermin 1mg SQ daily vs Simtuzumab 700mg IV every other week               | 0 | Some concerns | Undetected | No concerns | Major concerns | No concerns    | No concerns | Moderate quality |
| Aldafermin 1mg SQ daily vs Simtuzumab 75mg SQ weekly                          | 0 | Some concerns | Undetected | No concerns | Major concerns | No concerns    | No concerns | Moderate quality |
| Aldafermin 1mg SQ daily vs Vitamin E 800 IU daily                             | 0 | No concerns   | Undetected | No concerns | Major concerns | No concerns    | No concerns | High quality     |
| Aldafermin 1mg SQ daily vs Vitamin E 800 IU daily and Pioglitazone 45mg daily | 0 | No concerns   | Undetected | No concerns | Major concerns | No concerns    | No concerns | High quality     |
| Aldafermin 1mg SQ daily vs Volixibat 10mg daily                               | 0 | No concerns   | Undetected | No concerns | No concerns    | Major concerns | No concerns | High quality     |

|                                                                                |   |               |            |             |                |                |             |                  |
|--------------------------------------------------------------------------------|---|---------------|------------|-------------|----------------|----------------|-------------|------------------|
| Aldafermin 1mg SQ daily vs Volixibat 20mg daily                                | 0 | No concerns   | Undetected | No concerns | No concerns    | Major concerns | No concerns | High quality     |
| Aldafermin 1mg SQ daily vs Volixibat 5mg daily                                 | 0 | No concerns   | Undetected | No concerns | No concerns    | Major concerns | No concerns | High quality     |
| Elafibranor 120 mg daily vs Emricasan 50mg BID                                 | 0 | No concerns   | Undetected | No concerns | Major concerns | No concerns    | No concerns | High quality     |
| Elafibranor 120 mg daily vs Emricasan 5mg BID                                  | 0 | No concerns   | Undetected | No concerns | No concerns    | Major concerns | No concerns | High quality     |
| Elafibranor 120 mg daily vs Liraglutide 1.8mg daily                            | 0 | No concerns   | Undetected | No concerns | Major concerns | No concerns    | No concerns | High quality     |
| Elafibranor 120 mg daily vs MSDC0602K 125mg TID                                | 0 | No concerns   | Undetected | No concerns | Major concerns | No concerns    | No concerns | High quality     |
| Elafibranor 120 mg daily vs MSDC0602K 250mg TID                                | 0 | No concerns   | Undetected | No concerns | Major concerns | No concerns    | No concerns | High quality     |
| Elafibranor 120 mg daily vs MSDC0602K 62.5mg TID                               | 0 | No concerns   | Undetected | No concerns | Major concerns | No concerns    | No concerns | High quality     |
| Elafibranor 120 mg daily vs Obeticholic acid 10mg daily                        | 0 | No concerns   | Undetected | No concerns | Major concerns | No concerns    | No concerns | High quality     |
| Elafibranor 120 mg daily vs Obeticholic acid 25mg daily                        | 0 | No concerns   | Undetected | No concerns | Major concerns | No concerns    | No concerns | High quality     |
| Elafibranor 120 mg daily vs Pioglitazone 30mg daily                            | 0 | No concerns   | Undetected | No concerns | Major concerns | No concerns    | No concerns | High quality     |
| Elafibranor 120 mg daily vs Pioglitazone 45mg daily                            | 0 | No concerns   | Undetected | No concerns | Major concerns | No concerns    | No concerns | High quality     |
| Elafibranor 120 mg daily vs Resmetirom 80mg daily                              | 0 | No concerns   | Undetected | No concerns | Major concerns | No concerns    | No concerns | High quality     |
| Elafibranor 120 mg daily vs Selonsertib 18mg daily                             | 0 | No concerns   | Undetected | No concerns | No concerns    | Major concerns | No concerns | High quality     |
| Elafibranor 120 mg daily vs Selonsertib 6mg daily                              | 0 | No concerns   | Undetected | No concerns | No concerns    | Major concerns | No concerns | High quality     |
| Elafibranor 120 mg daily vs Simtuzumab 125mg SQ weekly                         | 0 | Some concerns | Undetected | No concerns | Major concerns | No concerns    | No concerns | Moderate quality |
| Elafibranor 120 mg daily vs Simtuzumab 200mg IV every other week               | 0 | Some concerns | Undetected | No concerns | Major concerns | No concerns    | No concerns | Moderate quality |
| Elafibranor 120 mg daily vs Simtuzumab 700mg IV every other week               | 0 | No concerns   | Undetected | No concerns | Major concerns | No concerns    | No concerns | High quality     |
| Elafibranor 120 mg daily vs Simtuzumab 75mg SQ weekly                          | 0 | Some concerns | Undetected | No concerns | Major concerns | No concerns    | No concerns | Moderate quality |
| Elafibranor 120 mg daily vs Vitamin E 800 IU daily                             | 0 | No concerns   | Undetected | No concerns | Major concerns | No concerns    | No concerns | High quality     |
| Elafibranor 120 mg daily vs Vitamin E 800 IU daily and Pioglitazone 45mg daily | 0 | No concerns   | Undetected | No concerns | Major concerns | No concerns    | No concerns | High quality     |
| Elafibranor 120 mg daily vs Volixibat 10mg daily                               | 0 | No concerns   | Undetected | No concerns | Major concerns | No concerns    | No concerns | High quality     |
| Elafibranor 120 mg daily vs Volixibat 20mg daily                               | 0 | No concerns   | Undetected | No concerns | Major concerns | No concerns    | No concerns | High quality     |
| Elafibranor 120 mg daily vs Volixibat 5mg daily                                | 0 | No concerns   | Undetected | No concerns | Major concerns | No concerns    | No concerns | High quality     |
| Elafibranor 80 mg daily vs Emricasan 50mg BID                                  | 0 | No concerns   | Undetected | No concerns | Major concerns | No concerns    | No concerns | High quality     |

|                                                                               |   |               |            |             |                |                |             |                  |
|-------------------------------------------------------------------------------|---|---------------|------------|-------------|----------------|----------------|-------------|------------------|
| Elafibranor 80 mg daily vs Emricasan 5mg BID                                  | 0 | No concerns   | Undetected | No concerns | Major concerns | No concerns    | No concerns | High quality     |
| Elafibranor 80 mg daily vs Liraglutide 1.8mg daily                            | 0 | No concerns   | Undetected | No concerns | Major concerns | No concerns    | No concerns | High quality     |
| Elafibranor 80 mg daily vs MSDC0602K 125mg TID                                | 0 | No concerns   | Undetected | No concerns | Major concerns | No concerns    | No concerns | High quality     |
| Elafibranor 80 mg daily vs MSDC0602K 250mg TID                                | 0 | No concerns   | Undetected | No concerns | Major concerns | No concerns    | No concerns | High quality     |
| Elafibranor 80 mg daily vs MSDC0602K 62.5mg TID                               | 0 | No concerns   | Undetected | No concerns | Major concerns | No concerns    | No concerns | High quality     |
| Elafibranor 80 mg daily vs Obeticholic acid 10mg daily                        | 0 | No concerns   | Undetected | No concerns | Major concerns | No concerns    | No concerns | High quality     |
| Elafibranor 80 mg daily vs Obeticholic acid 25mg daily                        | 0 | No concerns   | Undetected | No concerns | Major concerns | No concerns    | No concerns | High quality     |
| Elafibranor 80 mg daily vs Pioglitazone 30mg daily                            | 0 | No concerns   | Undetected | No concerns | Major concerns | No concerns    | No concerns | High quality     |
| Elafibranor 80 mg daily vs Pioglitazone 45mg daily                            | 0 | No concerns   | Undetected | No concerns | Major concerns | No concerns    | No concerns | High quality     |
| Elafibranor 80 mg daily vs Resmetirom 80mg daily                              | 0 | No concerns   | Undetected | No concerns | Major concerns | No concerns    | No concerns | High quality     |
| Elafibranor 80 mg daily vs Selonsertib 18mg daily                             | 0 | No concerns   | Undetected | No concerns | Major concerns | No concerns    | No concerns | High quality     |
| Elafibranor 80 mg daily vs Selonsertib 6mg daily                              | 0 | No concerns   | Undetected | No concerns | Major concerns | No concerns    | No concerns | High quality     |
| Elafibranor 80 mg daily vs Simtuzumab 125mg SQ weekly                         | 0 | No concerns   | Undetected | No concerns | Major concerns | No concerns    | No concerns | High quality     |
| Elafibranor 80 mg daily vs Simtuzumab 200mg IV every other week               | 0 | Some concerns | Undetected | No concerns | Major concerns | No concerns    | No concerns | Moderate quality |
| Elafibranor 80 mg daily vs Simtuzumab 700mg IV every other week               | 0 | No concerns   | Undetected | No concerns | Major concerns | No concerns    | No concerns | High quality     |
| Elafibranor 80 mg daily vs Simtuzumab 75mg SQ weekly                          | 0 | Some concerns | Undetected | No concerns | Major concerns | No concerns    | No concerns | Moderate quality |
| Elafibranor 80 mg daily vs Vitamin E 800 IU daily                             | 0 | No concerns   | Undetected | No concerns | Major concerns | No concerns    | No concerns | High quality     |
| Elafibranor 80 mg daily vs Vitamin E 800 IU daily and Pioglitazone 45mg daily | 0 | No concerns   | Undetected | No concerns | Major concerns | No concerns    | No concerns | High quality     |
| Elafibranor 80 mg daily vs Volixibat 10mg daily                               | 0 | No concerns   | Undetected | No concerns | Major concerns | No concerns    | No concerns | High quality     |
| Elafibranor 80 mg daily vs Volixibat 20mg daily                               | 0 | No concerns   | Undetected | No concerns | Major concerns | No concerns    | No concerns | High quality     |
| Elafibranor 80 mg daily vs Volixibat 5mg daily                                | 0 | No concerns   | Undetected | No concerns | Major concerns | No concerns    | No concerns | High quality     |
| Emricasan 50mg BID vs Liraglutide 1.8mg daily                                 | 0 | No concerns   | Undetected | No concerns | No concerns    | Major concerns | No concerns | High quality     |
| Emricasan 50mg BID vs MSDC0602K 125mg TID                                     | 0 | No concerns   | Undetected | No concerns | Major concerns | No concerns    | No concerns | High quality     |
| Emricasan 50mg BID vs MSDC0602K 250mg TID                                     | 0 | No concerns   | Undetected | No concerns | Major concerns | No concerns    | No concerns | High quality     |
| Emricasan 50mg BID vs MSDC0602K 62.5mg TID                                    | 0 | No concerns   | Undetected | No concerns | Major concerns | No concerns    | No concerns | High quality     |
| Emricasan 50mg BID vs Obeticholic acid 10mg daily                             | 0 | No concerns   | Undetected | No concerns | Major concerns | No concerns    | No concerns | High quality     |

|                                                                          |   |               |            |             |                |                |             |                  |
|--------------------------------------------------------------------------|---|---------------|------------|-------------|----------------|----------------|-------------|------------------|
| Emricasan 50mg BID vs Obeticholic acid 25mg daily                        | 0 | No concerns   | Undetected | No concerns | Major concerns | No concerns    | No concerns | High quality     |
| Emricasan 50mg BID vs Pioglitazone 30mg daily                            | 0 | No concerns   | Undetected | No concerns | No concerns    | Major concerns | No concerns | High quality     |
| Emricasan 50mg BID vs Pioglitazone 45mg daily                            | 0 | No concerns   | Undetected | No concerns | No concerns    | Major concerns | No concerns | High quality     |
| Emricasan 50mg BID vs Resmetirom 80mg daily                              | 0 | No concerns   | Undetected | No concerns | Major concerns | No concerns    | No concerns | High quality     |
| Emricasan 50mg BID vs Selonsertib 18mg daily                             | 0 | No concerns   | Undetected | No concerns | Major concerns | No concerns    | No concerns | High quality     |
| Emricasan 50mg BID vs Selonsertib 6mg daily                              | 0 | No concerns   | Undetected | No concerns | Major concerns | No concerns    | No concerns | High quality     |
| Emricasan 50mg BID vs Simtuzumab 125mg SQ weekly                         | 0 | Some concerns | Undetected | No concerns | Major concerns | No concerns    | No concerns | Moderate quality |
| Emricasan 50mg BID vs Simtuzumab 200mg IV every other week               | 0 | Some concerns | Undetected | No concerns | Major concerns | No concerns    | No concerns | Moderate quality |
| Emricasan 50mg BID vs Simtuzumab 700mg IV every other week               | 0 | No concerns   | Undetected | No concerns | Major concerns | No concerns    | No concerns | High quality     |
| Emricasan 50mg BID vs Simtuzumab 75mg SQ weekly                          | 0 | Some concerns | Undetected | No concerns | Major concerns | No concerns    | No concerns | Moderate quality |
| Emricasan 50mg BID vs Vitamin E 800 IU daily                             | 0 | No concerns   | Undetected | No concerns | No concerns    | Major concerns | No concerns | High quality     |
| Emricasan 50mg BID vs Vitamin E 800 IU daily and Pioglitazone 45mg daily | 0 | No concerns   | Undetected | No concerns | No concerns    | Major concerns | No concerns | High quality     |
| Emricasan 50mg BID vs Volixibat 10mg daily                               | 0 | No concerns   | Undetected | No concerns | Major concerns | No concerns    | No concerns | High quality     |
| Emricasan 50mg BID vs Volixibat 20mg daily                               | 0 | No concerns   | Undetected | No concerns | Major concerns | No concerns    | No concerns | High quality     |
| Emricasan 50mg BID vs Volixibat 5mg daily                                | 0 | No concerns   | Undetected | No concerns | Major concerns | No concerns    | No concerns | High quality     |
| Emricasan 5mg BID vs Liraglutide 1.8mg daily                             | 0 | No concerns   | Undetected | No concerns | No concerns    | Major concerns | No concerns | High quality     |
| Emricasan 5mg BID vs MSDC0602K 125mg TID                                 | 0 | No concerns   | Undetected | No concerns | No concerns    | Major concerns | No concerns | High quality     |
| Emricasan 5mg BID vs MSDC0602K 250mg TID                                 | 0 | No concerns   | Undetected | No concerns | No concerns    | Major concerns | No concerns | High quality     |
| Emricasan 5mg BID vs MSDC0602K 62.5mg TID                                | 0 | No concerns   | Undetected | No concerns | Major concerns | No concerns    | No concerns | High quality     |
| Emricasan 5mg BID vs Obeticholic acid 10mg daily                         | 0 | No concerns   | Undetected | No concerns | No concerns    | Major concerns | No concerns | High quality     |
| Emricasan 5mg BID vs Obeticholic acid 25mg daily                         | 0 | No concerns   | Undetected | No concerns | No concerns    | Major concerns | No concerns | High quality     |
| Emricasan 5mg BID vs Pioglitazone 30mg daily                             | 0 | No concerns   | Undetected | No concerns | No concerns    | Major concerns | No concerns | High quality     |
| Emricasan 5mg BID vs Pioglitazone 45mg daily                             | 0 | No concerns   | Undetected | No concerns | No concerns    | Major concerns | No concerns | High quality     |
| Emricasan 5mg BID vs Resmetirom 80mg daily                               | 0 | No concerns   | Undetected | No concerns | Major concerns | No concerns    | No concerns | High quality     |
| Emricasan 5mg BID vs Selonsertib 18mg daily                              | 0 | No concerns   | Undetected | No concerns | Major concerns | No concerns    | No concerns | High quality     |
| Emricasan 5mg BID vs Selonsertib 6mg daily                               | 0 | No concerns   | Undetected | No concerns | Major concerns | No concerns    | No concerns | High quality     |

|                                                                               |   |               |            |             |                |                |             |                  |
|-------------------------------------------------------------------------------|---|---------------|------------|-------------|----------------|----------------|-------------|------------------|
| Emricasan 5mg BID vs Simtuzumab 125mg SQ weekly                               | 0 | No concerns   | Undetected | No concerns | Major concerns | No concerns    | No concerns | High quality     |
| Emricasan 5mg BID vs Simtuzumab 200mg IV every other week                     | 0 | Some concerns | Undetected | No concerns | Major concerns | No concerns    | No concerns | Moderate quality |
| Emricasan 5mg BID vs Simtuzumab 700mg IV every other week                     | 0 | No concerns   | Undetected | No concerns | No concerns    | Major concerns | No concerns | High quality     |
| Emricasan 5mg BID vs Simtuzumab 75mg SQ weekly                                | 0 | Some concerns | Undetected | No concerns | Major concerns | No concerns    | No concerns | Moderate quality |
| Emricasan 5mg BID vs Vitamin E 800 IU daily                                   | 0 | No concerns   | Undetected | No concerns | No concerns    | Major concerns | No concerns | High quality     |
| Emricasan 5mg BID vs Vitamin E 800 IU daily and Pioglitazone 45mg daily       | 0 | No concerns   | Undetected | No concerns | No concerns    | Major concerns | No concerns | High quality     |
| Emricasan 5mg BID vs Volixibat 10mg daily                                     | 0 | No concerns   | Undetected | No concerns | Major concerns | No concerns    | No concerns | High quality     |
| Emricasan 5mg BID vs Volixibat 20mg daily                                     | 0 | No concerns   | Undetected | No concerns | Major concerns | No concerns    | No concerns | High quality     |
| Emricasan 5mg BID vs Volixibat 5mg daily                                      | 0 | No concerns   | Undetected | No concerns | Major concerns | No concerns    | No concerns | High quality     |
| Liraglutide 1.8mg daily vs MSDC0602K 125mg TID                                | 0 | No concerns   | Undetected | No concerns | Major concerns | No concerns    | No concerns | High quality     |
| Liraglutide 1.8mg daily vs MSDC0602K 250mg TID                                | 0 | No concerns   | Undetected | No concerns | Major concerns | No concerns    | No concerns | High quality     |
| Liraglutide 1.8mg daily vs MSDC0602K 62.5mg TID                               | 0 | No concerns   | Undetected | No concerns | Major concerns | No concerns    | No concerns | High quality     |
| Liraglutide 1.8mg daily vs Obeticholic acid 10mg daily                        | 0 | No concerns   | Undetected | No concerns | Major concerns | No concerns    | No concerns | High quality     |
| Liraglutide 1.8mg daily vs Obeticholic acid 25mg daily                        | 0 | No concerns   | Undetected | No concerns | Major concerns | No concerns    | No concerns | High quality     |
| Liraglutide 1.8mg daily vs Pioglitazone 30mg daily                            | 0 | No concerns   | Undetected | No concerns | Major concerns | No concerns    | No concerns | High quality     |
| Liraglutide 1.8mg daily vs Pioglitazone 45mg daily                            | 0 | No concerns   | Undetected | No concerns | Major concerns | No concerns    | No concerns | High quality     |
| Liraglutide 1.8mg daily vs Resmetirom 80mg daily                              | 0 | No concerns   | Undetected | No concerns | Major concerns | No concerns    | No concerns | High quality     |
| Liraglutide 1.8mg daily vs Selonsertib 18mg daily                             | 0 | No concerns   | Undetected | No concerns | No concerns    | Major concerns | No concerns | High quality     |
| Liraglutide 1.8mg daily vs Selonsertib 6mg daily                              | 0 | No concerns   | Undetected | No concerns | No concerns    | Major concerns | No concerns | High quality     |
| Liraglutide 1.8mg daily vs Simtuzumab 125mg SQ weekly                         | 0 | Some concerns | Undetected | No concerns | Major concerns | No concerns    | No concerns | Moderate quality |
| Liraglutide 1.8mg daily vs Simtuzumab 200mg IV every other week               | 0 | Some concerns | Undetected | No concerns | No concerns    | Major concerns | No concerns | Moderate quality |
| Liraglutide 1.8mg daily vs Simtuzumab 700mg IV every other week               | 0 | Some concerns | Undetected | No concerns | Major concerns | No concerns    | No concerns | Moderate quality |
| Liraglutide 1.8mg daily vs Simtuzumab 75mg SQ weekly                          | 0 | Some concerns | Undetected | No concerns | Major concerns | No concerns    | No concerns | Moderate quality |
| Liraglutide 1.8mg daily vs Vitamin E 800 IU daily                             | 0 | No concerns   | Undetected | No concerns | Major concerns | No concerns    | No concerns | High quality     |
| Liraglutide 1.8mg daily vs Vitamin E 800 IU daily and Pioglitazone 45mg daily | 0 | No concerns   | Undetected | No concerns | Major concerns | No concerns    | No concerns | High quality     |
| Liraglutide 1.8mg daily vs Volixibat 10mg daily                               | 0 | No concerns   | Undetected | No concerns | Major concerns | No concerns    | No concerns | High quality     |

|                                                                           |   |             |            |             |                |                |             |              |
|---------------------------------------------------------------------------|---|-------------|------------|-------------|----------------|----------------|-------------|--------------|
| Liraglutide 1.8mg daily vs Volixibat 20mg daily                           | 0 | No concerns | Undetected | No concerns | Major concerns | No concerns    | No concerns | High quality |
| Liraglutide 1.8mg daily vs Volixibat 5mg daily                            | 0 | No concerns | Undetected | No concerns | No concerns    | Major concerns | No concerns | High quality |
| MSDC0602K 125mg TID vs Obeticholic acid 10mg daily                        | 0 | No concerns | Undetected | No concerns | Major concerns | No concerns    | No concerns | High quality |
| MSDC0602K 125mg TID vs Obeticholic acid 25mg daily                        | 0 | No concerns | Undetected | No concerns | Major concerns | No concerns    | No concerns | High quality |
| MSDC0602K 125mg TID vs Pioglitazone 30mg daily                            | 0 | No concerns | Undetected | No concerns | Major concerns | No concerns    | No concerns | High quality |
| MSDC0602K 125mg TID vs Pioglitazone 45mg daily                            | 0 | No concerns | Undetected | No concerns | Major concerns | No concerns    | No concerns | High quality |
| MSDC0602K 125mg TID vs Resmetirom 80mg daily                              | 0 | No concerns | Undetected | No concerns | Major concerns | No concerns    | No concerns | High quality |
| MSDC0602K 125mg TID vs Selonsertib 18mg daily                             | 0 | No concerns | Undetected | No concerns | No concerns    | Major concerns | No concerns | High quality |
| MSDC0602K 125mg TID vs Selonsertib 6mg daily                              | 0 | No concerns | Undetected | No concerns | Major concerns | No concerns    | No concerns | High quality |
| MSDC0602K 125mg TID vs Simtuzumab 125mg SQ weekly                         | 0 | No concerns | Undetected | No concerns | Major concerns | No concerns    | No concerns | High quality |
| MSDC0602K 125mg TID vs Simtuzumab 200mg IV every other week               | 0 | No concerns | Undetected | No concerns | Major concerns | No concerns    | No concerns | High quality |
| MSDC0602K 125mg TID vs Simtuzumab 700mg IV every other week               | 0 | No concerns | Undetected | No concerns | Major concerns | No concerns    | No concerns | High quality |
| MSDC0602K 125mg TID vs Simtuzumab 75mg SQ weekly                          | 0 | No concerns | Undetected | No concerns | Major concerns | No concerns    | No concerns | High quality |
| MSDC0602K 125mg TID vs Vitamin E 800 IU daily                             | 0 | No concerns | Undetected | No concerns | Major concerns | No concerns    | No concerns | High quality |
| MSDC0602K 125mg TID vs Vitamin E 800 IU daily and Pioglitazone 45mg daily | 0 | No concerns | Undetected | No concerns | Major concerns | No concerns    | No concerns | High quality |
| MSDC0602K 125mg TID vs Volixibat 10mg daily                               | 0 | No concerns | Undetected | No concerns | Major concerns | No concerns    | No concerns | High quality |
| MSDC0602K 125mg TID vs Volixibat 20mg daily                               | 0 | No concerns | Undetected | No concerns | Major concerns | No concerns    | No concerns | High quality |
| MSDC0602K 125mg TID vs Volixibat 5mg daily                                | 0 | No concerns | Undetected | No concerns | Major concerns | No concerns    | No concerns | High quality |
| MSDC0602K 250mg TID vs Obeticholic acid 10mg daily                        | 0 | No concerns | Undetected | No concerns | Major concerns | No concerns    | No concerns | High quality |
| MSDC0602K 250mg TID vs Obeticholic acid 25mg daily                        | 0 | No concerns | Undetected | No concerns | Major concerns | No concerns    | No concerns | High quality |
| MSDC0602K 250mg TID vs Pioglitazone 30mg daily                            | 0 | No concerns | Undetected | No concerns | Major concerns | No concerns    | No concerns | High quality |
| MSDC0602K 250mg TID vs Pioglitazone 45mg daily                            | 0 | No concerns | Undetected | No concerns | Major concerns | No concerns    | No concerns | High quality |
| MSDC0602K 250mg TID vs Resmetirom 80mg daily                              | 0 | No concerns | Undetected | No concerns | Major concerns | No concerns    | No concerns | High quality |
| MSDC0602K 250mg TID vs Selonsertib 18mg daily                             | 0 | No concerns | Undetected | No concerns | No concerns    | Major concerns | No concerns | High quality |
| MSDC0602K 250mg TID vs Selonsertib 6mg daily                              | 0 | No concerns | Undetected | No concerns | No concerns    | Major concerns | No concerns | High quality |
| MSDC0602K 250mg TID vs Simtuzumab 125mg SQ weekly                         | 0 | No concerns | Undetected | No concerns | Major concerns | No concerns    | No concerns | High quality |



|                                                                            |   |             |            |             |                |                |             |              |
|----------------------------------------------------------------------------|---|-------------|------------|-------------|----------------|----------------|-------------|--------------|
| MSDC0602K 250mg TID vs Simtuzumab 200mg IV every other week                | 0 | No concerns | Undetected | No concerns | Major concerns | No concerns    | No concerns | High quality |
| MSDC0602K 250mg TID vs Simtuzumab 700mg IV every other week                | 0 | No concerns | Undetected | No concerns | Major concerns | No concerns    | No concerns | High quality |
| MSDC0602K 250mg TID vs Simtuzumab 75mg SQ weekly                           | 0 | No concerns | Undetected | No concerns | Major concerns | No concerns    | No concerns | High quality |
| MSDC0602K 250mg TID vs Vitamin E 800 IU daily                              | 0 | No concerns | Undetected | No concerns | Major concerns | No concerns    | No concerns | High quality |
| MSDC0602K 250mg TID vs Vitamin E 800 IU daily and Pioglitazone 45mg daily  | 0 | No concerns | Undetected | No concerns | Major concerns | No concerns    | No concerns | High quality |
| MSDC0602K 250mg TID vs Volixibat 10mg daily                                | 0 | No concerns | Undetected | No concerns | Major concerns | No concerns    | No concerns | High quality |
| MSDC0602K 250mg TID vs Volixibat 20mg daily                                | 0 | No concerns | Undetected | No concerns | Major concerns | No concerns    | No concerns | High quality |
| MSDC0602K 250mg TID vs Volixibat 5mg daily                                 | 0 | No concerns | Undetected | No concerns | Major concerns | No concerns    | No concerns | High quality |
| MSDC0602K 62.5mg TID vs Obeticholic acid 10mg daily                        | 0 | No concerns | Undetected | No concerns | Major concerns | No concerns    | No concerns | High quality |
| MSDC0602K 62.5mg TID vs Obeticholic acid 25mg daily                        | 0 | No concerns | Undetected | No concerns | Major concerns | No concerns    | No concerns | High quality |
| MSDC0602K 62.5mg TID vs Pioglitazone 30mg daily                            | 0 | No concerns | Undetected | No concerns | No concerns    | Major concerns | No concerns | High quality |
| MSDC0602K 62.5mg TID vs Pioglitazone 45mg daily                            | 0 | No concerns | Undetected | No concerns | No concerns    | Major concerns | No concerns | High quality |
| MSDC0602K 62.5mg TID vs Resmetirom 80mg daily                              | 0 | No concerns | Undetected | No concerns | Major concerns | No concerns    | No concerns | High quality |
| MSDC0602K 62.5mg TID vs Selonsertib 18mg daily                             | 0 | No concerns | Undetected | No concerns | Major concerns | No concerns    | No concerns | High quality |
| MSDC0602K 62.5mg TID vs Selonsertib 6mg daily                              | 0 | No concerns | Undetected | No concerns | Major concerns | No concerns    | No concerns | High quality |
| MSDC0602K 62.5mg TID vs Simtuzumab 125mg SQ weekly                         | 0 | No concerns | Undetected | No concerns | Major concerns | No concerns    | No concerns | High quality |
| MSDC0602K 62.5mg TID vs Simtuzumab 200mg IV every other week               | 0 | No concerns | Undetected | No concerns | Major concerns | No concerns    | No concerns | High quality |
| MSDC0602K 62.5mg TID vs Simtuzumab 700mg IV every other week               | 0 | No concerns | Undetected | No concerns | Major concerns | No concerns    | No concerns | High quality |
| MSDC0602K 62.5mg TID vs Simtuzumab 75mg SQ weekly                          | 0 | No concerns | Undetected | No concerns | Major concerns | No concerns    | No concerns | High quality |
| MSDC0602K 62.5mg TID vs Vitamin E 800 IU daily                             | 0 | No concerns | Undetected | No concerns | Major concerns | No concerns    | No concerns | High quality |
| MSDC0602K 62.5mg TID vs Vitamin E 800 IU daily and Pioglitazone 45mg daily | 0 | No concerns | Undetected | No concerns | No concerns    | Major concerns | No concerns | High quality |
| MSDC0602K 62.5mg TID vs Volixibat 10mg daily                               | 0 | No concerns | Undetected | No concerns | Major concerns | No concerns    | No concerns | High quality |
| MSDC0602K 62.5mg TID vs Volixibat 20mg daily                               | 0 | No concerns | Undetected | No concerns | Major concerns | No concerns    | No concerns | High quality |
| MSDC0602K 62.5mg TID vs Volixibat 5mg daily                                | 0 | No concerns | Undetected | No concerns | Major concerns | No concerns    | No concerns | High quality |



|                                                                                   |   |               |            |             |                |                |             |                  |
|-----------------------------------------------------------------------------------|---|---------------|------------|-------------|----------------|----------------|-------------|------------------|
| Obeticholic acid 10mg daily vs Pioglitazone 30mg daily                            | 0 | No concerns   | Undetected | No concerns | Major concerns | No concerns    | No concerns | High quality     |
| Obeticholic acid 10mg daily vs Pioglitazone 45mg daily                            | 0 | No concerns   | Undetected | No concerns | Major concerns | No concerns    | No concerns | High quality     |
| Obeticholic acid 10mg daily vs Resmetirom 80mg daily                              | 0 | No concerns   | Undetected | No concerns | Major concerns | No concerns    | No concerns | High quality     |
| Obeticholic acid 10mg daily vs Selonsertib 18mg daily                             | 0 | No concerns   | Undetected | No concerns | No concerns    | Major concerns | No concerns | High quality     |
| Obeticholic acid 10mg daily vs Selonsertib 6mg daily                              | 0 | No concerns   | Undetected | No concerns | No concerns    | Major concerns | No concerns | High quality     |
| Obeticholic acid 10mg daily vs Simtuzumab 125mg SQ weekly                         | 0 | No concerns   | Undetected | No concerns | Major concerns | No concerns    | No concerns | High quality     |
| Obeticholic acid 10mg daily vs Simtuzumab 200mg IV every other week               | 0 | Some concerns | Undetected | No concerns | Major concerns | No concerns    | No concerns | Moderate quality |
| Obeticholic acid 10mg daily vs Simtuzumab 700mg IV every other week               | 0 | No concerns   | Undetected | No concerns | Major concerns | No concerns    | No concerns | High quality     |
| Obeticholic acid 10mg daily vs Simtuzumab 75mg SQ weekly                          | 0 | No concerns   | Undetected | No concerns | Major concerns | No concerns    | No concerns | High quality     |
| Obeticholic acid 10mg daily vs Vitamin E 800 IU daily                             | 0 | No concerns   | Undetected | No concerns | Major concerns | No concerns    | No concerns | High quality     |
| Obeticholic acid 10mg daily vs Vitamin E 800 IU daily and Pioglitazone 45mg daily | 0 | No concerns   | Undetected | No concerns | Major concerns | No concerns    | No concerns | High quality     |
| Obeticholic acid 10mg daily vs Volixibat 10mg daily                               | 0 | No concerns   | Undetected | No concerns | Major concerns | No concerns    | No concerns | High quality     |
| Obeticholic acid 10mg daily vs Volixibat 20mg daily                               | 0 | No concerns   | Undetected | No concerns | Major concerns | No concerns    | No concerns | High quality     |
| Obeticholic acid 10mg daily vs Volixibat 5mg daily                                | 0 | No concerns   | Undetected | No concerns | Major concerns | No concerns    | No concerns | High quality     |
| Obeticholic acid 25mg daily vs Pioglitazone 30mg daily                            | 0 | No concerns   | Undetected | No concerns | Major concerns | No concerns    | No concerns | High quality     |
| Obeticholic acid 25mg daily vs Pioglitazone 45mg daily                            | 0 | No concerns   | Undetected | No concerns | Major concerns | No concerns    | No concerns | High quality     |
| Obeticholic acid 25mg daily vs Resmetirom 80mg daily                              | 0 | No concerns   | Undetected | No concerns | Major concerns | No concerns    | No concerns | High quality     |
| Obeticholic acid 25mg daily vs Selonsertib 18mg daily                             | 0 | No concerns   | Undetected | No concerns | No concerns    | Major concerns | No concerns | High quality     |
| Obeticholic acid 25mg daily vs Selonsertib 6mg daily                              | 0 | No concerns   | Undetected | No concerns | No concerns    | Major concerns | No concerns | High quality     |
| Obeticholic acid 25mg daily vs Simtuzumab 125mg SQ weekly                         | 0 | Some concerns | Undetected | No concerns | Major concerns | No concerns    | No concerns | Moderate quality |
| Obeticholic acid 25mg daily vs Simtuzumab 200mg IV every other week               | 0 | Some concerns | Undetected | No concerns | Major concerns | No concerns    | No concerns | Moderate quality |
| Obeticholic acid 25mg daily vs Simtuzumab 700mg IV every other week               | 0 | No concerns   | Undetected | No concerns | Major concerns | No concerns    | No concerns | High quality     |
| Obeticholic acid 25mg daily vs Simtuzumab 75mg SQ weekly                          | 0 | Some concerns | Undetected | No concerns | Major concerns | No concerns    | No concerns | Moderate quality |
| Obeticholic acid 25mg daily vs Vitamin E 800 IU daily                             | 0 | No concerns   | Undetected | No concerns | Major concerns | No concerns    | No concerns | High quality     |

|                                                                                   |   |               |            |             |                |                |             |                  |
|-----------------------------------------------------------------------------------|---|---------------|------------|-------------|----------------|----------------|-------------|------------------|
| Obeticholic acid 25mg daily vs Vitamin E 800 IU daily and Pioglitazone 45mg daily | 0 | No concerns   | Undetected | No concerns | Major concerns | No concerns    | No concerns | High quality     |
| Obeticholic acid 25mg daily vs Volixibat 10mg daily                               | 0 | No concerns   | Undetected | No concerns | Major concerns | No concerns    | No concerns | High quality     |
| Obeticholic acid 25mg daily vs Volixibat 20mg daily                               | 0 | No concerns   | Undetected | No concerns | Major concerns | No concerns    | No concerns | High quality     |
| Obeticholic acid 25mg daily vs Volixibat 5mg daily                                | 0 | No concerns   | Undetected | No concerns | Major concerns | No concerns    | No concerns | High quality     |
| Pioglitazone 30mg daily vs Pioglitazone 45mg daily                                | 0 | No concerns   | Undetected | No concerns | Major concerns | No concerns    | No concerns | High quality     |
| Pioglitazone 30mg daily vs Resmetirom 80mg daily                                  | 0 | No concerns   | Undetected | No concerns | Major concerns | No concerns    | No concerns | High quality     |
| Pioglitazone 30mg daily vs Selonsertib 18mg daily                                 | 0 | No concerns   | Undetected | No concerns | No concerns    | No concerns    | No concerns | High quality     |
| Pioglitazone 30mg daily vs Selonsertib 6mg daily                                  | 0 | No concerns   | Undetected | No concerns | No concerns    | No concerns    | No concerns | High quality     |
| Pioglitazone 30mg daily vs Simtuzumab 125mg SQ weekly                             | 0 | No concerns   | Undetected | No concerns | Major concerns | No concerns    | No concerns | High quality     |
| Pioglitazone 30mg daily vs Simtuzumab 200mg IV every other week                   | 0 | No concerns   | Undetected | No concerns | Major concerns | No concerns    | No concerns | High quality     |
| Pioglitazone 30mg daily vs Simtuzumab 700mg IV every other week                   | 0 | No concerns   | Undetected | No concerns | Major concerns | No concerns    | No concerns | High quality     |
| Pioglitazone 30mg daily vs Simtuzumab 75mg SQ weekly                              | 0 | No concerns   | Undetected | No concerns | Major concerns | No concerns    | No concerns | High quality     |
| Pioglitazone 30mg daily vs Vitamin E 800 IU daily and Pioglitazone 45mg daily     | 0 | No concerns   | Undetected | No concerns | Major concerns | No concerns    | No concerns | High quality     |
| Pioglitazone 30mg daily vs Volixibat 10mg daily                                   | 0 | No concerns   | Undetected | No concerns | Major concerns | No concerns    | No concerns | High quality     |
| Pioglitazone 30mg daily vs Volixibat 20mg daily                                   | 0 | No concerns   | Undetected | No concerns | Major concerns | No concerns    | No concerns | High quality     |
| Pioglitazone 30mg daily vs Volixibat 5mg daily                                    | 0 | No concerns   | Undetected | No concerns | No concerns    | Major concerns | No concerns | High quality     |
| Pioglitazone 45mg daily vs Resmetirom 80mg daily                                  | 0 | No concerns   | Undetected | No concerns | Major concerns | No concerns    | No concerns | High quality     |
| Pioglitazone 45mg daily vs Selonsertib 18mg daily                                 | 0 | No concerns   | Undetected | No concerns | No concerns    | No concerns    | No concerns | High quality     |
| Pioglitazone 45mg daily vs Selonsertib 6mg daily                                  | 0 | No concerns   | Undetected | No concerns | No concerns    | No concerns    | No concerns | High quality     |
| Pioglitazone 45mg daily vs Simtuzumab 125mg SQ weekly                             | 0 | Some concerns | Undetected | No concerns | Major concerns | No concerns    | No concerns | Moderate quality |
| Pioglitazone 45mg daily vs Simtuzumab 200mg IV every other week                   | 0 | Some concerns | Undetected | No concerns | Major concerns | No concerns    | No concerns | Moderate quality |
| Pioglitazone 45mg daily vs Simtuzumab 700mg IV every other week                   | 0 | Some concerns | Undetected | No concerns | Major concerns | No concerns    | No concerns | Moderate quality |
| Pioglitazone 45mg daily vs Simtuzumab 75mg SQ weekly                              | 0 | Some concerns | Undetected | No concerns | Major concerns | No concerns    | No concerns | Moderate quality |
| Pioglitazone 45mg daily vs Vitamin E 800 IU daily                                 | 0 | No concerns   | Undetected | No concerns | Major concerns | No concerns    | No concerns | High quality     |
| Pioglitazone 45mg daily vs Vitamin E 800 IU daily and Pioglitazone 45mg daily     | 0 | No concerns   | Undetected | No concerns | Major concerns | No concerns    | No concerns | High quality     |

|                                                                              |   |               |            |             |                |                |             |                  |
|------------------------------------------------------------------------------|---|---------------|------------|-------------|----------------|----------------|-------------|------------------|
| Pioglitazone 45mg daily vs Volixibat 10mg daily                              | 0 | No concerns   | Undetected | No concerns | Major concerns | No concerns    | No concerns | High quality     |
| Pioglitazone 45mg daily vs Volixibat 20mg daily                              | 0 | No concerns   | Undetected | No concerns | Major concerns | No concerns    | No concerns | High quality     |
| Pioglitazone 45mg daily vs Volixibat 5mg daily                               | 0 | No concerns   | Undetected | No concerns | No concerns    | Major concerns | No concerns | High quality     |
| Resmetirom 80mg daily vs Selonsertib 18mg daily                              | 0 | No concerns   | Undetected | No concerns | Major concerns | No concerns    | No concerns | High quality     |
| Resmetirom 80mg daily vs Selonsertib 6mg daily                               | 0 | No concerns   | Undetected | No concerns | Major concerns | No concerns    | No concerns | High quality     |
| Resmetirom 80mg daily vs Simtuzumab 125mg SQ weekly                          | 0 | Some concerns | Undetected | No concerns | Major concerns | No concerns    | No concerns | Moderate quality |
| Resmetirom 80mg daily vs Simtuzumab 200mg IV every other week                | 0 | Some concerns | Undetected | No concerns | Major concerns | No concerns    | No concerns | Moderate quality |
| Resmetirom 80mg daily vs Simtuzumab 700mg IV every other week                | 0 | Some concerns | Undetected | No concerns | Major concerns | No concerns    | No concerns | Moderate quality |
| Resmetirom 80mg daily vs Simtuzumab 75mg SQ weekly                           | 0 | Some concerns | Undetected | No concerns | Major concerns | No concerns    | No concerns | Moderate quality |
| Resmetirom 80mg daily vs Vitamin E 800 IU daily                              | 0 | No concerns   | Undetected | No concerns | Major concerns | No concerns    | No concerns | High quality     |
| Resmetirom 80mg daily vs Vitamin E 800 IU daily and Pioglitazone 45mg daily  | 0 | No concerns   | Undetected | No concerns | Major concerns | No concerns    | No concerns | High quality     |
| Resmetirom 80mg daily vs Volixibat 10mg daily                                | 0 | No concerns   | Undetected | No concerns | Major concerns | No concerns    | No concerns | High quality     |
| Resmetirom 80mg daily vs Volixibat 20mg daily                                | 0 | No concerns   | Undetected | No concerns | Major concerns | No concerns    | No concerns | High quality     |
| Resmetirom 80mg daily vs Volixibat 5mg daily                                 | 0 | No concerns   | Undetected | No concerns | Major concerns | No concerns    | No concerns | High quality     |
| Selonsertib 18mg daily vs Simtuzumab 125mg SQ weekly                         | 0 | Some concerns | Undetected | No concerns | Major concerns | No concerns    | No concerns | Moderate quality |
| Selonsertib 18mg daily vs Simtuzumab 200mg IV every other week               | 0 | Some concerns | Undetected | No concerns | Major concerns | No concerns    | No concerns | Moderate quality |
| Selonsertib 18mg daily vs Simtuzumab 700mg IV every other week               | 0 | No concerns   | Undetected | No concerns | Major concerns | No concerns    | No concerns | High quality     |
| Selonsertib 18mg daily vs Simtuzumab 75mg SQ weekly                          | 0 | Some concerns | Undetected | No concerns | Major concerns | No concerns    | No concerns | Moderate quality |
| Selonsertib 18mg daily vs Vitamin E 800 IU daily                             | 0 | No concerns   | Undetected | No concerns | No concerns    | No concerns    | No concerns | High quality     |
| Selonsertib 18mg daily vs Vitamin E 800 IU daily and Pioglitazone 45mg daily | 0 | No concerns   | Undetected | No concerns | No concerns    | No concerns    | No concerns | High quality     |
| Selonsertib 18mg daily vs Volixibat 10mg daily                               | 0 | No concerns   | Undetected | No concerns | Major concerns | No concerns    | No concerns | High quality     |
| Selonsertib 18mg daily vs Volixibat 20mg daily                               | 0 | No concerns   | Undetected | No concerns | Major concerns | No concerns    | No concerns | High quality     |
| Selonsertib 18mg daily vs Volixibat 5mg daily                                | 0 | No concerns   | Undetected | No concerns | Major concerns | No concerns    | No concerns | High quality     |
| Selonsertib 6mg daily vs Simtuzumab 125mg SQ weekly                          | 0 | Some concerns | Undetected | No concerns | Major concerns | No concerns    | No concerns | Moderate quality |
| Selonsertib 6mg daily vs Simtuzumab 200mg IV every other week                | 0 | Some concerns | Undetected | No concerns | Major concerns | No concerns    | No concerns | Moderate quality |

|                                                                                            |   |               |            |             |                |                |             |                  |
|--------------------------------------------------------------------------------------------|---|---------------|------------|-------------|----------------|----------------|-------------|------------------|
| Selonsertib 6mg daily vs Simtuzumab 700mg IV every other week                              | 0 | No concerns   | Undetected | No concerns | Major concerns | No concerns    | No concerns | High quality     |
| Selonsertib 6mg daily vs Simtuzumab 75mg SQ weekly                                         | 0 | Some concerns | Undetected | No concerns | Major concerns | No concerns    | No concerns | Moderate quality |
| Selonsertib 6mg daily vs Vitamin E 800 IU daily                                            | 0 | No concerns   | Undetected | No concerns | No concerns    | Major concerns | No concerns | High quality     |
| Selonsertib 6mg daily vs Vitamin E 800 IU daily and Pioglitazone 45mg daily                | 0 | No concerns   | Undetected | No concerns | No concerns    | No concerns    | No concerns | High quality     |
| Selonsertib 6mg daily vs Volixibat 10mg daily                                              | 0 | No concerns   | Undetected | No concerns | Major concerns | No concerns    | No concerns | High quality     |
| Selonsertib 6mg daily vs Volixibat 20mg daily                                              | 0 | No concerns   | Undetected | No concerns | Major concerns | No concerns    | No concerns | High quality     |
| Selonsertib 6mg daily vs Volixibat 5mg daily                                               | 0 | No concerns   | Undetected | No concerns | Major concerns | No concerns    | No concerns | High quality     |
| Simtuzumab 125mg SQ weekly vs Simtuzumab 200mg IV every other week                         | 0 | Some concerns | Undetected | No concerns | Major concerns | No concerns    | No concerns | Moderate quality |
| Simtuzumab 125mg SQ weekly vs Simtuzumab 700mg IV every other week                         | 0 | Some concerns | Undetected | No concerns | Major concerns | No concerns    | No concerns | Moderate quality |
| Simtuzumab 125mg SQ weekly vs Vitamin E 800 IU daily                                       | 0 | No concerns   | Undetected | No concerns | Major concerns | No concerns    | No concerns | High quality     |
| Simtuzumab 125mg SQ weekly vs Vitamin E 800 IU daily and Pioglitazone 45mg daily           | 0 | No concerns   | Undetected | No concerns | Major concerns | No concerns    | No concerns | High quality     |
| Simtuzumab 125mg SQ weekly vs Volixibat 10mg daily                                         | 0 | No concerns   | Undetected | No concerns | Major concerns | No concerns    | No concerns | High quality     |
| Simtuzumab 125mg SQ weekly vs Volixibat 20mg daily                                         | 0 | No concerns   | Undetected | No concerns | Major concerns | No concerns    | No concerns | High quality     |
| Simtuzumab 125mg SQ weekly vs Volixibat 5mg daily                                          | 0 | No concerns   | Undetected | No concerns | Major concerns | No concerns    | No concerns | High quality     |
| Simtuzumab 200mg IV every other week vs Simtuzumab 75mg SQ weekly                          | 0 | Some concerns | Undetected | No concerns | Major concerns | No concerns    | No concerns | Moderate quality |
| Simtuzumab 200mg IV every other week vs Vitamin E 800 IU daily                             | 0 | Some concerns | Undetected | No concerns | Major concerns | No concerns    | No concerns | Moderate quality |
| Simtuzumab 200mg IV every other week vs Vitamin E 800 IU daily and Pioglitazone 45mg daily | 0 | No concerns   | Undetected | No concerns | Major concerns | No concerns    | No concerns | High quality     |
| Simtuzumab 200mg IV every other week vs Volixibat 10mg daily                               | 0 | Some concerns | Undetected | No concerns | Major concerns | No concerns    | No concerns | Moderate quality |
| Simtuzumab 200mg IV every other week vs Volixibat 20mg daily                               | 0 | No concerns   | Undetected | No concerns | Major concerns | No concerns    | No concerns | High quality     |
| Simtuzumab 200mg IV every other week vs Volixibat 5mg daily                                | 0 | No concerns   | Undetected | No concerns | Major concerns | No concerns    | No concerns | High quality     |
| Simtuzumab 700mg IV every other week vs Simtuzumab 75mg SQ weekly                          | 0 | Some concerns | Undetected | No concerns | Major concerns | No concerns    | No concerns | Moderate quality |
| Simtuzumab 700mg IV every other week vs Vitamin E 800 IU daily                             | 0 | No concerns   | Undetected | No concerns | Major concerns | No concerns    | No concerns | High quality     |
| Simtuzumab 700mg IV every other week vs Vitamin E 800 IU daily and Pioglitazone 45mg daily | 0 | No concerns   | Undetected | No concerns | Major concerns | No concerns    | No concerns | High quality     |
| Simtuzumab 700mg IV every other week vs Volixibat 10mg daily                               | 0 | No concerns   | Undetected | No concerns | Major concerns | No concerns    | No concerns | High quality     |

|                                                                                 |                          |                          |                       |                     |                    |                      |                    |                          |
|---------------------------------------------------------------------------------|--------------------------|--------------------------|-----------------------|---------------------|--------------------|----------------------|--------------------|--------------------------|
| Simtuzumab 700mg IV every other week vs Volixibat 20mg daily                    | 0                        | No concerns              | Undetected            | No concerns         | Major concerns     | No concerns          | No concerns        | High quality             |
| Simtuzumab 700mg IV every other week vs Volixibat 5mg daily                     | 0                        | No concerns              | Undetected            | No concerns         | Major concerns     | No concerns          | No concerns        | High quality             |
| Simtuzumab 75mg SQ weekly vs Vitamin E 800 IU daily                             | 0                        | No concerns              | Undetected            | No concerns         | Major concerns     | No concerns          | No concerns        | High quality             |
| Simtuzumab 75mg SQ weekly vs Vitamin E 800 IU daily and Pioglitazone 45mg daily | 0                        | No concerns              | Undetected            | No concerns         | Major concerns     | No concerns          | No concerns        | High quality             |
| Simtuzumab 75mg SQ weekly vs Volixibat 10mg daily                               | 0                        | No concerns              | Undetected            | No concerns         | Major concerns     | No concerns          | No concerns        | High quality             |
| Simtuzumab 75mg SQ weekly vs Volixibat 20mg daily                               | 0                        | No concerns              | Undetected            | No concerns         | Major concerns     | No concerns          | No concerns        | High quality             |
| Simtuzumab 75mg SQ weekly vs Volixibat 5mg daily                                | 0                        | No concerns              | Undetected            | No concerns         | Major concerns     | No concerns          | No concerns        | High quality             |
| Vitamin E 800 IU daily vs Volixibat 10mg daily                                  | 0                        | No concerns              | Undetected            | No concerns         | Major concerns     | No concerns          | No concerns        | High quality             |
| Vitamin E 800 IU daily vs Volixibat 20mg daily                                  | 0                        | No concerns              | Undetected            | No concerns         | Major concerns     | No concerns          | No concerns        | High quality             |
| Vitamin E 800 IU daily vs Volixibat 5mg daily                                   | 0                        | No concerns              | Undetected            | No concerns         | Major concerns     | No concerns          | No concerns        | High quality             |
| Vitamin E 800 IU daily and Pioglitazone 45mg daily vs Volixibat 10mg daily      | 0                        | No concerns              | Undetected            | No concerns         | Major concerns     | No concerns          | No concerns        | High quality             |
| Vitamin E 800 IU daily and Pioglitazone 45mg daily vs Volixibat 20mg daily      | 0                        | No concerns              | Undetected            | No concerns         | Major concerns     | No concerns          | No concerns        | High quality             |
| Vitamin E 800 IU daily and Pioglitazone 45mg daily vs Volixibat 5mg daily       | 0                        | No concerns              | Undetected            | No concerns         | No concerns        | Major concerns       | No concerns        | High quality             |
| <b><u>Fibrosis improvement without worsening NASH</u></b>                       |                          |                          |                       |                     |                    |                      |                    |                          |
| <b>Comparison</b>                                                               | <b>Number of studies</b> | <b>Within-study bias</b> | <b>Reporting bias</b> | <b>Indirectness</b> | <b>Imprecision</b> | <b>Heterogeneity</b> | <b>Incoherence</b> | <b>Confidence rating</b> |
| Aldafermin 1mg SQ daily vs Placebo                                              | 1                        | No concerns              | Undetected            | No concerns         | Major concerns     | No concerns          | No concerns        | High quality             |
| Cenicriviroc 150mg daily vs Placebo                                             | 1                        | Some concerns            | Undetected            | No concerns         | Major concerns     | No concerns          | No concerns        | Moderate quality         |
| Emricasan 50mg BID vs Emricasan 5mg BID                                         | 1                        | No concerns              | Undetected            | No concerns         | Major concerns     | No concerns          | No concerns        | High quality             |
| Emricasan 50mg BID vs Placebo                                                   | 1                        | No concerns              | Undetected            | No concerns         | Major concerns     | No concerns          | No concerns        | High quality             |
| Emricasan 5mg BID vs Placebo                                                    | 1                        | No concerns              | Undetected            | No concerns         | Major concerns     | No concerns          | No concerns        | High quality             |
| MSDC0602K 125mg TID vs MSDC0602K 250mg TID                                      | 1                        | No concerns              | Undetected            | No concerns         | Major concerns     | No concerns          | No concerns        | High quality             |
| MSDC0602K 125mg TID vs MSDC0602K 62.5mg TID                                     | 1                        | No concerns              | Undetected            | No concerns         | Major concerns     | No concerns          | No concerns        | High quality             |
| MSDC0602K 125mg TID vs Placebo                                                  | 1                        | No concerns              | Undetected            | No concerns         | Major concerns     | No concerns          | No concerns        | High quality             |
| MSDC0602K 250mg TID vs MSDC0602K 62.5mg TID                                     | 1                        | No concerns              | Undetected            | No concerns         | Major concerns     | No concerns          | No concerns        | High quality             |
| MSDC0602K 250mg TID vs Placebo                                                  | 1                        | No concerns              | Undetected            | No concerns         | Major concerns     | No concerns          | No concerns        | High quality             |
| MSDC0602K 62.5mg TID vs Placebo                                                 | 1                        | No concerns              | Undetected            | No concerns         | Major concerns     | No concerns          | No concerns        | High quality             |
| Obeticholic acid 10mg daily vs Obeticholic acid 25mg daily                      | 1                        | No concerns              | Undetected            | No concerns         | Major concerns     | No concerns          | No concerns        | High quality             |

|                                                                               |   |               |            |             |                |                |             |                  |
|-------------------------------------------------------------------------------|---|---------------|------------|-------------|----------------|----------------|-------------|------------------|
| Obeticholic acid 10mg daily vs Placebo                                        | 1 | No concerns   | Undetected | No concerns | No concerns    | Major concerns | No concerns | High quality     |
| Obeticholic acid 25mg daily vs Placebo                                        | 1 | No concerns   | Undetected | No concerns | No concerns    | Major concerns | No concerns | High quality     |
| Placebo vs Resmetirom 80mg daily                                              | 1 | No concerns   | Suspected  | No concerns | Major concerns | No concerns    | No concerns | Low quality      |
| Placebo vs Selonsertib 18mg daily                                             | 2 | No concerns   | Undetected | No concerns | Major concerns | No concerns    | No concerns | High quality     |
| Placebo vs Selonsertib 6mg daily                                              | 2 | No concerns   | Undetected | No concerns | Major concerns | No concerns    | No concerns | High quality     |
| Placebo vs Vitamin E 800 IU daily                                             | 1 | No concerns   | Undetected | No concerns | Major concerns | No concerns    | No concerns | High quality     |
| Placebo vs Vitamin E 800 IU daily and Pioglitazone 45mg daily                 | 1 | No concerns   | Undetected | No concerns | Major concerns | No concerns    | No concerns | High quality     |
| Selonsertib 18mg daily vs Selonsertib 6mg daily                               | 2 | No concerns   | Undetected | No concerns | Major concerns | No concerns    | No concerns | High quality     |
| Vitamin E 800 IU daily vs Vitamin E 800 IU daily and Pioglitazone 45mg daily  | 1 | No concerns   | Undetected | No concerns | Major concerns | No concerns    | No concerns | High quality     |
| Aldafermin 1mg SQ daily vs Cenicriviroc 150mg daily                           | 0 | Some concerns | Undetected | No concerns | Major concerns | No concerns    | No concerns | Moderate quality |
| Aldafermin 1mg SQ daily vs Emricasan 50mg BID                                 | 0 | No concerns   | Undetected | No concerns | No concerns    | Major concerns | No concerns | High quality     |
| Aldafermin 1mg SQ daily vs Emricasan 5mg BID                                  | 0 | No concerns   | Undetected | No concerns | No concerns    | Major concerns | No concerns | High quality     |
| Aldafermin 1mg SQ daily vs MSDC0602K 125mg TID                                | 0 | No concerns   | Undetected | No concerns | Major concerns | No concerns    | No concerns | High quality     |
| Aldafermin 1mg SQ daily vs MSDC0602K 250mg TID                                | 0 | No concerns   | Undetected | No concerns | Major concerns | No concerns    | No concerns | High quality     |
| Aldafermin 1mg SQ daily vs MSDC0602K 62.5mg TID                               | 0 | No concerns   | Undetected | No concerns | Major concerns | No concerns    | No concerns | High quality     |
| Aldafermin 1mg SQ daily vs Obeticholic acid 10mg daily                        | 0 | No concerns   | Undetected | No concerns | Major concerns | No concerns    | No concerns | High quality     |
| Aldafermin 1mg SQ daily vs Obeticholic acid 25mg daily                        | 0 | No concerns   | Undetected | No concerns | Major concerns | No concerns    | No concerns | High quality     |
| Aldafermin 1mg SQ daily vs Resmetirom 80mg daily                              | 0 | No concerns   | Undetected | No concerns | Major concerns | No concerns    | No concerns | High quality     |
| Aldafermin 1mg SQ daily vs Selonsertib 18mg daily                             | 0 | No concerns   | Undetected | No concerns | Major concerns | No concerns    | No concerns | High quality     |
| Aldafermin 1mg SQ daily vs Selonsertib 6mg daily                              | 0 | No concerns   | Undetected | No concerns | Major concerns | No concerns    | No concerns | High quality     |
| Aldafermin 1mg SQ daily vs Vitamin E 800 IU daily                             | 0 | No concerns   | Undetected | No concerns | Major concerns | No concerns    | No concerns | High quality     |
| Aldafermin 1mg SQ daily vs Vitamin E 800 IU daily and Pioglitazone 45mg daily | 0 | No concerns   | Undetected | No concerns | Major concerns | No concerns    | No concerns | High quality     |
| Cenicriviroc 150mg daily vs Emricasan 50mg BID                                | 0 | No concerns   | Undetected | No concerns | Major concerns | No concerns    | No concerns | High quality     |
| Cenicriviroc 150mg daily vs Emricasan 5mg BID                                 | 0 | No concerns   | Undetected | No concerns | Major concerns | No concerns    | No concerns | High quality     |
| Cenicriviroc 150mg daily vs MSDC0602K 125mg TID                               | 0 | No concerns   | Undetected | No concerns | Major concerns | No concerns    | No concerns | High quality     |
| Cenicriviroc 150mg daily vs MSDC0602K 250mg TID                               | 0 | No concerns   | Undetected | No concerns | Major concerns | No concerns    | No concerns | High quality     |
| Cenicriviroc 150mg daily vs MSDC0602K 62.5mg TID                              | 0 | No concerns   | Undetected | No concerns | Major concerns | No concerns    | No concerns | High quality     |
| Cenicriviroc 150mg daily vs Obeticholic acid 10mg daily                       | 0 | No concerns   | Undetected | No concerns | Major concerns | No concerns    | No concerns | High quality     |

|                                                                                |   |               |            |             |                |                |             |                  |
|--------------------------------------------------------------------------------|---|---------------|------------|-------------|----------------|----------------|-------------|------------------|
| Cenicriviroc 150mg daily vs Obeticholic acid 25mg daily                        | 0 | No concerns   | Undetected | No concerns | Major concerns | No concerns    | No concerns | High quality     |
| Cenicriviroc 150mg daily vs Resmetirom 80mg daily                              | 0 | Some concerns | Undetected | No concerns | Major concerns | No concerns    | No concerns | Moderate quality |
| Cenicriviroc 150mg daily vs Selonsertib 18mg daily                             | 0 | No concerns   | Undetected | No concerns | Major concerns | No concerns    | No concerns | High quality     |
| Cenicriviroc 150mg daily vs Selonsertib 6mg daily                              | 0 | No concerns   | Undetected | No concerns | Major concerns | No concerns    | No concerns | High quality     |
| Cenicriviroc 150mg daily vs Vitamin E 800 IU daily                             | 0 | No concerns   | Undetected | No concerns | Major concerns | No concerns    | No concerns | High quality     |
| Cenicriviroc 150mg daily vs Vitamin E 800 IU daily and Pioglitazone 45mg daily | 0 | No concerns   | Undetected | No concerns | Major concerns | No concerns    | No concerns | High quality     |
| Emricasan 50mg BID vs MSDC0602K 125mg TID                                      | 0 | No concerns   | Undetected | No concerns | Major concerns | No concerns    | No concerns | High quality     |
| Emricasan 50mg BID vs MSDC0602K 250mg TID                                      | 0 | No concerns   | Undetected | No concerns | Major concerns | No concerns    | No concerns | High quality     |
| Emricasan 50mg BID vs MSDC0602K 62.5mg TID                                     | 0 | No concerns   | Undetected | No concerns | Major concerns | No concerns    | No concerns | High quality     |
| Emricasan 50mg BID vs Obeticholic acid 10mg daily                              | 0 | No concerns   | Undetected | No concerns | No concerns    | Major concerns | No concerns | High quality     |
| Emricasan 50mg BID vs Obeticholic acid 25mg daily                              | 0 | No concerns   | Undetected | No concerns | No concerns    | Major concerns | No concerns | High quality     |
| Emricasan 50mg BID vs Resmetirom 80mg daily                                    | 0 | No concerns   | Undetected | No concerns | Major concerns | No concerns    | No concerns | High quality     |
| Emricasan 50mg BID vs Selonsertib 18mg daily                                   | 0 | No concerns   | Undetected | No concerns | Major concerns | No concerns    | No concerns | High quality     |
| Emricasan 50mg BID vs Selonsertib 6mg daily                                    | 0 | No concerns   | Undetected | No concerns | Major concerns | No concerns    | No concerns | High quality     |
| Emricasan 50mg BID vs Vitamin E 800 IU daily                                   | 0 | No concerns   | Undetected | No concerns | No concerns    | Major concerns | No concerns | High quality     |
| Emricasan 50mg BID vs Vitamin E 800 IU daily and Pioglitazone 45mg daily       | 0 | No concerns   | Undetected | No concerns | No concerns    | Major concerns | No concerns | High quality     |
| Emricasan 5mg BID vs MSDC0602K 125mg TID                                       | 0 | No concerns   | Undetected | No concerns | Major concerns | No concerns    | No concerns | High quality     |
| Emricasan 5mg BID vs MSDC0602K 250mg TID                                       | 0 | No concerns   | Undetected | No concerns | Major concerns | No concerns    | No concerns | High quality     |
| Emricasan 5mg BID vs MSDC0602K 62.5mg TID                                      | 0 | No concerns   | Undetected | No concerns | Major concerns | No concerns    | No concerns | High quality     |
| Emricasan 5mg BID vs Obeticholic acid 10mg daily                               | 0 | No concerns   | Undetected | No concerns | No concerns    | Major concerns | No concerns | High quality     |
| Emricasan 5mg BID vs Obeticholic acid 25mg daily                               | 0 | No concerns   | Undetected | No concerns | No concerns    | Major concerns | No concerns | High quality     |
| Emricasan 5mg BID vs Resmetirom 80mg daily                                     | 0 | No concerns   | Undetected | No concerns | Major concerns | No concerns    | No concerns | High quality     |
| Emricasan 5mg BID vs Selonsertib 18mg daily                                    | 0 | No concerns   | Undetected | No concerns | Major concerns | No concerns    | No concerns | High quality     |
| Emricasan 5mg BID vs Selonsertib 6mg daily                                     | 0 | No concerns   | Undetected | No concerns | Major concerns | No concerns    | No concerns | High quality     |
| Emricasan 5mg BID vs Vitamin E 800 IU daily                                    | 0 | No concerns   | Undetected | No concerns | No concerns    | Major concerns | No concerns | High quality     |
| Emricasan 5mg BID vs Vitamin E 800 IU daily and Pioglitazone 45mg daily        | 0 | No concerns   | Undetected | No concerns | No concerns    | Major concerns | No concerns | High quality     |







|                                                                                   |                          |                          |                       |                     |                    |                      |                    |                          |
|-----------------------------------------------------------------------------------|--------------------------|--------------------------|-----------------------|---------------------|--------------------|----------------------|--------------------|--------------------------|
| Obeticholic acid 10mg daily vs Vitamin E 800 IU daily and Pioglitazone 45mg daily | 0                        | No concerns              | Undetected            | No concerns         | Major concerns     | No concerns          | No concerns        | High quality             |
| Obeticholic acid 25mg daily vs Resmetirom 80mg daily                              | 0                        | No concerns              | Undetected            | No concerns         | Major concerns     | No concerns          | No concerns        | High quality             |
| Obeticholic acid 25mg daily vs Selonsertib 18mg daily                             | 0                        | No concerns              | Undetected            | No concerns         | No concerns        | Major concerns       | No concerns        | High quality             |
| Obeticholic acid 25mg daily vs Selonsertib 6mg daily                              | 0                        | No concerns              | Undetected            | No concerns         | No concerns        | Major concerns       | No concerns        | High quality             |
| Obeticholic acid 25mg daily vs Vitamin E 800 IU daily                             | 0                        | No concerns              | Undetected            | No concerns         | Major concerns     | No concerns          | No concerns        | High quality             |
| Obeticholic acid 25mg daily vs Vitamin E 800 IU daily and Pioglitazone 45mg daily | 0                        | No concerns              | Undetected            | No concerns         | Major concerns     | No concerns          | No concerns        | High quality             |
| Resmetirom 80mg daily vs Selonsertib 18mg daily                                   | 0                        | No concerns              | Undetected            | No concerns         | Major concerns     | No concerns          | No concerns        | High quality             |
| Resmetirom 80mg daily vs Selonsertib 6mg daily                                    | 0                        | No concerns              | Undetected            | No concerns         | Major concerns     | No concerns          | No concerns        | High quality             |
| Resmetirom 80mg daily vs Vitamin E 800 IU daily                                   | 0                        | No concerns              | Undetected            | No concerns         | Major concerns     | No concerns          | No concerns        | High quality             |
| Resmetirom 80mg daily vs Vitamin E 800 IU daily and Pioglitazone 45mg daily       | 0                        | No concerns              | Undetected            | No concerns         | Major concerns     | No concerns          | No concerns        | High quality             |
| Selonsertib 18mg daily vs Vitamin E 800 IU daily                                  | 0                        | No concerns              | Undetected            | No concerns         | Major concerns     | No concerns          | No concerns        | High quality             |
| Selonsertib 18mg daily vs Vitamin E 800 IU daily and Pioglitazone 45mg daily      | 0                        | No concerns              | Undetected            | No concerns         | Major concerns     | No concerns          | No concerns        | High quality             |
| Selonsertib 6mg daily vs Vitamin E 800 IU daily                                   | 0                        | No concerns              | Undetected            | No concerns         | Major concerns     | No concerns          | No concerns        | High quality             |
| Selonsertib 6mg daily vs Vitamin E 800 IU daily and Pioglitazone 45mg daily       | 0                        | No concerns              | Undetected            | No concerns         | Major concerns     | No concerns          | No concerns        | High quality             |
| <b><u>Fibrosis improvement regardless of NASH progression</u></b>                 |                          |                          |                       |                     |                    |                      |                    |                          |
| <b>Comparison</b>                                                                 | <b>Number of studies</b> | <b>Within-study bias</b> | <b>Reporting bias</b> | <b>Indirectness</b> | <b>Imprecision</b> | <b>Heterogeneity</b> | <b>Incoherence</b> | <b>Confidence rating</b> |
| Belapectin 2mg/kg IV biweekly vs Belapectin 8mg/kg IV biweekly                    | 1                        | No concerns              | Suspected             | No concerns         | Major concerns     | No concerns          | No concerns        | Low quality              |
| Belapectin 2mg/kg IV biweekly vs Placebo                                          | 1                        | No concerns              | Suspected             | No concerns         | Major concerns     | No concerns          | No concerns        | Low quality              |
| Belapectin 8mg/kg IV biweekly vs Placebo                                          | 1                        | No concerns              | Suspected             | No concerns         | Major concerns     | No concerns          | No concerns        | Low quality              |
| Emricasan 50mg BID vs Emricasan 5mg BID                                           | 1                        | No concerns              | Undetected            | No concerns         | Major concerns     | No concerns          | No concerns        | High quality             |
| Emricasan 50mg BID vs Placebo                                                     | 1                        | No concerns              | Undetected            | No concerns         | Major concerns     | No concerns          | No concerns        | High quality             |
| Emricasan 5mg BID vs Placebo                                                      | 1                        | No concerns              | Undetected            | No concerns         | Major concerns     | No concerns          | No concerns        | High quality             |
| Liraglutide 1.8mg daily vs Placebo                                                | 1                        | No concerns              | Suspected             | No concerns         | Major concerns     | No concerns          | No concerns        | Low quality              |
| Losartan 50mg daily vs Placebo                                                    | 1                        | No concerns              | Undetected            | No concerns         | Major concerns     | No concerns          | No concerns        | High quality             |
| Metadoxine 500mg BID vs Placebo                                                   | 1                        | Some concerns            | Undetected            | No concerns         | Major concerns     | No concerns          | No concerns        | Moderate quality         |

|                                                                                        |   |                |            |             |                |                |             |                  |
|----------------------------------------------------------------------------------------|---|----------------|------------|-------------|----------------|----------------|-------------|------------------|
| Obeticholic acid 10mg daily vs Obeticholic acid 25mg daily                             | 1 | No concerns    | Undetected | No concerns | No concerns    | Major concerns | No concerns | High quality     |
| Obeticholic acid 10mg daily vs Placebo                                                 | 1 | No concerns    | Undetected | No concerns | Major concerns | No concerns    | No concerns | High quality     |
| Obeticholic acid 25mg daily vs Placebo                                                 | 2 | No concerns    | Undetected | No concerns | No concerns    | Major concerns | No concerns | High quality     |
| Pentoxifylline 400mg TID vs Placebo                                                    | 1 | No concerns    | Suspected  | No concerns | Major concerns | No concerns    | No concerns | Low quality      |
| Pioglitazone 30mg daily vs Placebo                                                     | 1 | No concerns    | Undetected | No concerns | Major concerns | No concerns    | No concerns | High quality     |
| Pioglitazone 30mg daily vs Vitamin E 800 IU daily                                      | 1 | No concerns    | Undetected | No concerns | Major concerns | No concerns    | No concerns | High quality     |
| Pioglitazone 45mg daily vs Placebo                                                     | 1 | No concerns    | Undetected | No concerns | Major concerns | No concerns    | No concerns | High quality     |
| Placebo vs Rosiglitazone 8mg daily                                                     | 1 | No concerns    | Undetected | No concerns | Major concerns | No concerns    | No concerns | High quality     |
| Placebo vs Selonsertib 18mg daily                                                      | 2 | No concerns    | Undetected | No concerns | Major concerns | No concerns    | No concerns | High quality     |
| Placebo vs Selonsertib 6mg daily                                                       | 2 | No concerns    | Undetected | No concerns | Major concerns | No concerns    | No concerns | High quality     |
| Placebo vs Silymarin 420mg                                                             | 1 | No concerns    | Suspected  | No concerns | Major concerns | No concerns    | No concerns | Low quality      |
| Placebo vs Silymarin 700mg                                                             | 1 | No concerns    | Suspected  | No concerns | Major concerns | No concerns    | No concerns | Low quality      |
| Placebo vs Simtuzumab 125mg SQ weekly                                                  | 1 | Some concerns  | Suspected  | No concerns | Major concerns | No concerns    | No concerns | Low quality      |
| Placebo vs Simtuzumab 200mg IV every other week                                        | 1 | Some concerns  | Suspected  | No concerns | Major concerns | No concerns    | No concerns | Low quality      |
| Placebo vs Simtuzumab 700mg IV every other week                                        | 1 | Some concerns  | Suspected  | No concerns | Major concerns | No concerns    | No concerns | Low quality      |
| Placebo vs Simtuzumab 75mg SQ weekly                                                   | 1 | Some concerns  | Suspected  | No concerns | Major concerns | No concerns    | No concerns | Low quality      |
| Placebo vs Telmisartan 40mg daily                                                      | 1 | Major concerns | Suspected  | No concerns | Major concerns | No concerns    | No concerns | Very low quality |
| Placebo vs Vitamin E 800 IU daily                                                      | 1 | No concerns    | Undetected | No concerns | Major concerns | No concerns    | No concerns | High quality     |
| Placebo vs Volixibat 10mg daily                                                        | 1 | No concerns    | Undetected | No concerns | Major concerns | No concerns    | No concerns | High quality     |
| Placebo vs Volixibat 20mg daily                                                        | 1 | No concerns    | Undetected | No concerns | Major concerns | No concerns    | No concerns | High quality     |
| Placebo vs Volixibat 5mg daily                                                         | 1 | No concerns    | Undetected | No concerns | Major concerns | No concerns    | No concerns | High quality     |
| omega 3 PUFA (EPA 1050mg) daily vs Placebo                                             | 1 | No concerns    | Undetected | No concerns | Major concerns | No concerns    | No concerns | High quality     |
| omega 3 PUFA (EPA 2160mg) daily vs Placebo                                             | 1 | No concerns    | Undetected | No concerns | Major concerns | No concerns    | No concerns | High quality     |
| Rosiglitazone 8mg and Losartan 50mg daily vs Rosiglitazone 8mg and Metformin 500mg BID | 1 | Major concerns | Suspected  | No concerns | Major concerns | No concerns    | No concerns | Low quality      |
| Rosiglitazone 8mg and Losartan 50mg daily vs Rosiglitazone 8mg daily                   | 1 | Major concerns | Suspected  | No concerns | Major concerns | No concerns    | No concerns | Low quality      |
| Rosiglitazone 8mg and Metformin 500mg BID vs Rosiglitazone 8mg daily                   | 1 | Major concerns | Suspected  | No concerns | Major concerns | No concerns    | No concerns | Low quality      |
| Selonsertib 18mg daily vs Selonsertib 6mg daily                                        | 2 | No concerns    | Undetected | No concerns | Major concerns | No concerns    | No concerns | High quality     |
| Silymarin 420mg vs Silymarin 700mg                                                     | 1 | No concerns    | Undetected | No concerns | Major concerns | No concerns    | No concerns | High quality     |
| Simtuzumab 125mg SQ weekly vs Simtuzumab 75mg SQ weekly                                | 1 | Some concerns  | Suspected  | No concerns | Major concerns | No concerns    | No concerns | Low quality      |
| Simtuzumab 200mg IV every other week vs Simtuzumab 700mg IV every other week           | 1 | Some concerns  | Suspected  | No concerns | Major concerns | No concerns    | No concerns | Low quality      |

|                                                                            |   |               |            |             |                |             |             |                  |
|----------------------------------------------------------------------------|---|---------------|------------|-------------|----------------|-------------|-------------|------------------|
| Volixibat 10mg daily vs Volixibat 20mg daily                               | 1 | No concerns   | Undetected | No concerns | Major concerns | No concerns | No concerns | High quality     |
| Volixibat 10mg daily vs Volixibat 5mg daily                                | 1 | No concerns   | Undetected | No concerns | Major concerns | No concerns | No concerns | High quality     |
| Volixibat 20mg daily vs Volixibat 5mg daily                                | 1 | No concerns   | Undetected | No concerns | Major concerns | No concerns | No concerns | High quality     |
| Belapectin 2mg/kg IV biweekly vs Emricasan 50mg BID                        | 0 | No concerns   | Undetected | No concerns | Major concerns | No concerns | No concerns | High quality     |
| Belapectin 2mg/kg IV biweekly vs Emricasan 5mg BID                         | 0 | No concerns   | Undetected | No concerns | Major concerns | No concerns | No concerns | High quality     |
| Belapectin 2mg/kg IV biweekly vs Liraglutide 1.8mg daily                   | 0 | No concerns   | Undetected | No concerns | Major concerns | No concerns | No concerns | High quality     |
| Belapectin 2mg/kg IV biweekly vs Losartan 50mg daily                       | 0 | No concerns   | Undetected | No concerns | Major concerns | No concerns | No concerns | High quality     |
| Belapectin 2mg/kg IV biweekly vs Metadoxine 500mg BID                      | 0 | No concerns   | Undetected | No concerns | Major concerns | No concerns | No concerns | High quality     |
| Belapectin 2mg/kg IV biweekly vs Obeticholic acid 10mg daily               | 0 | No concerns   | Undetected | No concerns | Major concerns | No concerns | No concerns | High quality     |
| Belapectin 2mg/kg IV biweekly vs Obeticholic acid 25mg daily               | 0 | No concerns   | Undetected | No concerns | Major concerns | No concerns | No concerns | High quality     |
| Belapectin 2mg/kg IV biweekly vs Pentoxifylline 400mg TID                  | 0 | No concerns   | Undetected | No concerns | Major concerns | No concerns | No concerns | High quality     |
| Belapectin 2mg/kg IV biweekly vs Pioglitazone 30mg daily                   | 0 | No concerns   | Undetected | No concerns | Major concerns | No concerns | No concerns | High quality     |
| Belapectin 2mg/kg IV biweekly vs Pioglitazone 45mg daily                   | 0 | No concerns   | Undetected | No concerns | Major concerns | No concerns | No concerns | High quality     |
| Belapectin 2mg/kg IV biweekly vs Rosiglitazone 8mg and Losartan 50mg daily | 0 | Some concerns | Undetected | No concerns | Major concerns | No concerns | No concerns | Moderate quality |
| Belapectin 2mg/kg IV biweekly vs Rosiglitazone 8mg and Metformin 500mg BID | 0 | Some concerns | Undetected | No concerns | Major concerns | No concerns | No concerns | Moderate quality |
| Belapectin 2mg/kg IV biweekly vs Rosiglitazone 8mg daily                   | 0 | No concerns   | Undetected | No concerns | Major concerns | No concerns | No concerns | High quality     |
| Belapectin 2mg/kg IV biweekly vs Selonsertib 18mg daily                    | 0 | No concerns   | Undetected | No concerns | Major concerns | No concerns | No concerns | High quality     |
| Belapectin 2mg/kg IV biweekly vs Selonsertib 6mg daily                     | 0 | No concerns   | Undetected | No concerns | Major concerns | No concerns | No concerns | High quality     |
| Belapectin 2mg/kg IV biweekly vs Silymarin 420mg                           | 0 | No concerns   | Undetected | No concerns | Major concerns | No concerns | No concerns | High quality     |
| Belapectin 2mg/kg IV biweekly vs Silymarin 700mg                           | 0 | No concerns   | Undetected | No concerns | Major concerns | No concerns | No concerns | High quality     |
| Belapectin 2mg/kg IV biweekly vs Simtuzumab 125mg SQ weekly                | 0 | No concerns   | Undetected | No concerns | Major concerns | No concerns | No concerns | High quality     |
| Belapectin 2mg/kg IV biweekly vs Simtuzumab 200mg IV every other week      | 0 | Some concerns | Undetected | No concerns | Major concerns | No concerns | No concerns | Moderate quality |
| Belapectin 2mg/kg IV biweekly vs Simtuzumab 700mg IV every other week      | 0 | No concerns   | Undetected | No concerns | Major concerns | No concerns | No concerns | High quality     |
| Belapectin 2mg/kg IV biweekly vs Simtuzumab 75mg SQ weekly                 | 0 | No concerns   | Undetected | No concerns | Major concerns | No concerns | No concerns | High quality     |

|                                                                            |   |               |            |             |                |             |             |                  |
|----------------------------------------------------------------------------|---|---------------|------------|-------------|----------------|-------------|-------------|------------------|
| Belapectin 2mg/kg IV biweekly vs Telmisartan 40mg daily                    | 0 | Some concerns | Undetected | No concerns | Major concerns | No concerns | No concerns | Moderate quality |
| Belapectin 2mg/kg IV biweekly vs Vitamin E 800 IU daily                    | 0 | No concerns   | Undetected | No concerns | Major concerns | No concerns | No concerns | High quality     |
| Belapectin 2mg/kg IV biweekly vs Volixibat 10mg daily                      | 0 | No concerns   | Undetected | No concerns | Major concerns | No concerns | No concerns | High quality     |
| Belapectin 2mg/kg IV biweekly vs Volixibat 20mg daily                      | 0 | No concerns   | Undetected | No concerns | Major concerns | No concerns | No concerns | High quality     |
| Belapectin 2mg/kg IV biweekly vs Volixibat 5mg daily                       | 0 | No concerns   | Undetected | No concerns | Major concerns | No concerns | No concerns | High quality     |
| Belapectin 2mg/kg IV biweekly vs omega 3 PUFA (EPA 1050mg) daily           | 0 | No concerns   | Undetected | No concerns | Major concerns | No concerns | No concerns | High quality     |
| Belapectin 2mg/kg IV biweekly vs omega 3 PUFA (EPA 2160mg) daily           | 0 | No concerns   | Undetected | No concerns | Major concerns | No concerns | No concerns | High quality     |
| Belapectin 8mg/kg IV biweekly vs Emricasan 50mg BID                        | 0 | No concerns   | Undetected | No concerns | Major concerns | No concerns | No concerns | High quality     |
| Belapectin 8mg/kg IV biweekly vs Emricasan 5mg BID                         | 0 | No concerns   | Undetected | No concerns | Major concerns | No concerns | No concerns | High quality     |
| Belapectin 8mg/kg IV biweekly vs Liraglutide 1.8mg daily                   | 0 | No concerns   | Undetected | No concerns | Major concerns | No concerns | No concerns | High quality     |
| Belapectin 8mg/kg IV biweekly vs Losartan 50mg daily                       | 0 | No concerns   | Undetected | No concerns | Major concerns | No concerns | No concerns | High quality     |
| Belapectin 8mg/kg IV biweekly vs Metadoxine 500mg BID                      | 0 | No concerns   | Undetected | No concerns | Major concerns | No concerns | No concerns | High quality     |
| Belapectin 8mg/kg IV biweekly vs Obeticholic acid 10mg daily               | 0 | No concerns   | Undetected | No concerns | Major concerns | No concerns | No concerns | High quality     |
| Belapectin 8mg/kg IV biweekly vs Obeticholic acid 25mg daily               | 0 | No concerns   | Undetected | No concerns | Major concerns | No concerns | No concerns | High quality     |
| Belapectin 8mg/kg IV biweekly vs Pentoxifylline 400mg TID                  | 0 | No concerns   | Undetected | No concerns | Major concerns | No concerns | No concerns | High quality     |
| Belapectin 8mg/kg IV biweekly vs Pioglitazone 30mg daily                   | 0 | No concerns   | Undetected | No concerns | Major concerns | No concerns | No concerns | High quality     |
| Belapectin 8mg/kg IV biweekly vs Pioglitazone 45mg daily                   | 0 | No concerns   | Undetected | No concerns | Major concerns | No concerns | No concerns | High quality     |
| Belapectin 8mg/kg IV biweekly vs Rosiglitazone 8mg and Losartan 50mg daily | 0 | Some concerns | Undetected | No concerns | Major concerns | No concerns | No concerns | Moderate quality |
| Belapectin 8mg/kg IV biweekly vs Rosiglitazone 8mg and Metformin 500mg BID | 0 | Some concerns | Undetected | No concerns | Major concerns | No concerns | No concerns | Moderate quality |
| Belapectin 8mg/kg IV biweekly vs Rosiglitazone 8mg daily                   | 0 | No concerns   | Undetected | No concerns | Major concerns | No concerns | No concerns | High quality     |
| Belapectin 8mg/kg IV biweekly vs Selonsertib 18mg daily                    | 0 | No concerns   | Undetected | No concerns | Major concerns | No concerns | No concerns | High quality     |
| Belapectin 8mg/kg IV biweekly vs Selonsertib 6mg daily                     | 0 | No concerns   | Undetected | No concerns | Major concerns | No concerns | No concerns | High quality     |
| Belapectin 8mg/kg IV biweekly vs Silymarin 420mg                           | 0 | No concerns   | Undetected | No concerns | Major concerns | No concerns | No concerns | High quality     |
| Belapectin 8mg/kg IV biweekly vs Silymarin 700mg                           | 0 | No concerns   | Undetected | No concerns | Major concerns | No concerns | No concerns | High quality     |
| Belapectin 8mg/kg IV biweekly vs Simtuzumab 125mg SQ weekly                | 0 | No concerns   | Undetected | No concerns | Major concerns | No concerns | No concerns | High quality     |

|                                                                       |   |               |            |             |                |                |             |                  |
|-----------------------------------------------------------------------|---|---------------|------------|-------------|----------------|----------------|-------------|------------------|
| Belapectin 8mg/kg IV biweekly vs Simtuzumab 200mg IV every other week | 0 | No concerns   | Undetected | No concerns | Major concerns | No concerns    | No concerns | High quality     |
| Belapectin 8mg/kg IV biweekly vs Simtuzumab 700mg IV every other week | 0 | No concerns   | Undetected | No concerns | Major concerns | No concerns    | No concerns | High quality     |
| Belapectin 8mg/kg IV biweekly vs Simtuzumab 75mg SQ weekly            | 0 | No concerns   | Undetected | No concerns | Major concerns | No concerns    | No concerns | High quality     |
| Belapectin 8mg/kg IV biweekly vs Telmisartan 40mg daily               | 0 | Some concerns | Undetected | No concerns | Major concerns | No concerns    | No concerns | Moderate quality |
| Belapectin 8mg/kg IV biweekly vs Vitamin E 800 IU daily               | 0 | No concerns   | Undetected | No concerns | Major concerns | No concerns    | No concerns | High quality     |
| Belapectin 8mg/kg IV biweekly vs Volixibat 10mg daily                 | 0 | No concerns   | Undetected | No concerns | Major concerns | No concerns    | No concerns | High quality     |
| Belapectin 8mg/kg IV biweekly vs Volixibat 20mg daily                 | 0 | No concerns   | Undetected | No concerns | Major concerns | No concerns    | No concerns | High quality     |
| Belapectin 8mg/kg IV biweekly vs Volixibat 5mg daily                  | 0 | No concerns   | Undetected | No concerns | Major concerns | No concerns    | No concerns | High quality     |
| Belapectin 8mg/kg IV biweekly vs omega 3 PUFA (EPA 1050mg) daily      | 0 | No concerns   | Undetected | No concerns | Major concerns | No concerns    | No concerns | High quality     |
| Belapectin 8mg/kg IV biweekly vs omega 3 PUFA (EPA 2160mg) daily      | 0 | No concerns   | Undetected | No concerns | Major concerns | No concerns    | No concerns | High quality     |
| Emricasan 50mg BID vs Liraglutide 1.8mg daily                         | 0 | No concerns   | Undetected | No concerns | Major concerns | No concerns    | No concerns | High quality     |
| Emricasan 50mg BID vs Losartan 50mg daily                             | 0 | No concerns   | Undetected | No concerns | Major concerns | No concerns    | No concerns | High quality     |
| Emricasan 50mg BID vs Metadoxine 500mg BID                            | 0 | No concerns   | Undetected | No concerns | Major concerns | No concerns    | No concerns | High quality     |
| Emricasan 50mg BID vs Obeticholic acid 10mg daily                     | 0 | No concerns   | Undetected | No concerns | No concerns    | Major concerns | No concerns | High quality     |
| Emricasan 50mg BID vs Obeticholic acid 25mg daily                     | 0 | No concerns   | Undetected | No concerns | No concerns    | Major concerns | No concerns | High quality     |
| Emricasan 50mg BID vs Pentoxifylline 400mg TID                        | 0 | No concerns   | Undetected | No concerns | No concerns    | Major concerns | No concerns | High quality     |
| Emricasan 50mg BID vs Pioglitazone 30mg daily                         | 0 | No concerns   | Undetected | No concerns | No concerns    | Major concerns | No concerns | High quality     |
| Emricasan 50mg BID vs Pioglitazone 45mg daily                         | 0 | No concerns   | Undetected | No concerns | No concerns    | Major concerns | No concerns | High quality     |
| Emricasan 50mg BID vs Rosiglitazone 8mg and Losartan 50mg daily       | 0 | Some concerns | Undetected | No concerns | Major concerns | No concerns    | No concerns | Moderate quality |
| Emricasan 50mg BID vs Rosiglitazone 8mg and Metformin 500mg BID       | 0 | Some concerns | Undetected | No concerns | Major concerns | No concerns    | No concerns | Moderate quality |
| Emricasan 50mg BID vs Rosiglitazone 8mg daily                         | 0 | No concerns   | Undetected | No concerns | Major concerns | No concerns    | No concerns | High quality     |
| Emricasan 50mg BID vs Selonsertib 18mg daily                          | 0 | No concerns   | Undetected | No concerns | Major concerns | No concerns    | No concerns | High quality     |
| Emricasan 50mg BID vs Selonsertib 6mg daily                           | 0 | No concerns   | Undetected | No concerns | Major concerns | No concerns    | No concerns | High quality     |
| Emricasan 50mg BID vs Silymarin 420mg                                 | 0 | No concerns   | Undetected | No concerns | Major concerns | No concerns    | No concerns | High quality     |
| Emricasan 50mg BID vs Silymarin 700mg                                 | 0 | No concerns   | Undetected | No concerns | Major concerns | No concerns    | No concerns | High quality     |

|                                                                |   |               |            |             |                |                |             |                  |
|----------------------------------------------------------------|---|---------------|------------|-------------|----------------|----------------|-------------|------------------|
| Emricasan 50mg BID vs Simtuzumab 125mg SQ weekly               | 0 | Some concerns | Undetected | No concerns | Major concerns | No concerns    | No concerns | Moderate quality |
| Emricasan 50mg BID vs Simtuzumab 200mg IV every other week     | 0 | Some concerns | Undetected | No concerns | Major concerns | No concerns    | No concerns | Moderate quality |
| Emricasan 50mg BID vs Simtuzumab 700mg IV every other week     | 0 | No concerns   | Undetected | No concerns | Major concerns | No concerns    | No concerns | High quality     |
| Emricasan 50mg BID vs Simtuzumab 75mg SQ weekly                | 0 | Some concerns | Undetected | No concerns | Major concerns | No concerns    | No concerns | Moderate quality |
| Emricasan 50mg BID vs Telmisartan 40mg daily                   | 0 | Some concerns | Undetected | No concerns | Major concerns | No concerns    | No concerns | Moderate quality |
| Emricasan 50mg BID vs Vitamin E 800 IU daily                   | 0 | No concerns   | Undetected | No concerns | No concerns    | Major concerns | No concerns | High quality     |
| Emricasan 50mg BID vs Volixibat 10mg daily                     | 0 | No concerns   | Undetected | No concerns | Major concerns | No concerns    | No concerns | High quality     |
| Emricasan 50mg BID vs Volixibat 20mg daily                     | 0 | No concerns   | Undetected | No concerns | Major concerns | No concerns    | No concerns | High quality     |
| Emricasan 50mg BID vs Volixibat 5mg daily                      | 0 | No concerns   | Undetected | No concerns | Major concerns | No concerns    | No concerns | High quality     |
| Emricasan 50mg BID vs omega 3 PUFA (EPA 1050mg) daily          | 0 | No concerns   | Undetected | No concerns | Major concerns | No concerns    | No concerns | High quality     |
| Emricasan 50mg BID vs omega 3 PUFA (EPA 2160mg) daily          | 0 | No concerns   | Undetected | No concerns | Major concerns | No concerns    | No concerns | High quality     |
| Emricasan 5mg BID vs Liraglutide 1.8mg daily                   | 0 | No concerns   | Undetected | No concerns | Major concerns | No concerns    | No concerns | High quality     |
| Emricasan 5mg BID vs Losartan 50mg daily                       | 0 | No concerns   | Undetected | No concerns | Major concerns | No concerns    | No concerns | High quality     |
| Emricasan 5mg BID vs Metadoxine 500mg BID                      | 0 | No concerns   | Undetected | No concerns | Major concerns | No concerns    | No concerns | High quality     |
| Emricasan 5mg BID vs Obeticholic acid 10mg daily               | 0 | No concerns   | Undetected | No concerns | Major concerns | No concerns    | No concerns | High quality     |
| Emricasan 5mg BID vs Obeticholic acid 25mg daily               | 0 | No concerns   | Undetected | No concerns | No concerns    | Major concerns | No concerns | High quality     |
| Emricasan 5mg BID vs Pentoxifylline 400mg TID                  | 0 | No concerns   | Undetected | No concerns | No concerns    | Major concerns | No concerns | High quality     |
| Emricasan 5mg BID vs Pioglitazone 30mg daily                   | 0 | No concerns   | Undetected | No concerns | No concerns    | Major concerns | No concerns | High quality     |
| Emricasan 5mg BID vs Pioglitazone 45mg daily                   | 0 | No concerns   | Undetected | No concerns | No concerns    | Major concerns | No concerns | High quality     |
| Emricasan 5mg BID vs Rosiglitazone 8mg and Losartan 50mg daily | 0 | Some concerns | Undetected | No concerns | Major concerns | No concerns    | No concerns | Moderate quality |
| Emricasan 5mg BID vs Rosiglitazone 8mg and Metformin 500mg BID | 0 | Some concerns | Undetected | No concerns | Major concerns | No concerns    | No concerns | Moderate quality |
| Emricasan 5mg BID vs Rosiglitazone 8mg daily                   | 0 | No concerns   | Undetected | No concerns | Major concerns | No concerns    | No concerns | High quality     |
| Emricasan 5mg BID vs Selonsertib 18mg daily                    | 0 | No concerns   | Undetected | No concerns | Major concerns | No concerns    | No concerns | High quality     |
| Emricasan 5mg BID vs Selonsertib 6mg daily                     | 0 | No concerns   | Undetected | No concerns | Major concerns | No concerns    | No concerns | High quality     |
| Emricasan 5mg BID vs Silymarin 420mg                           | 0 | No concerns   | Undetected | No concerns | Major concerns | No concerns    | No concerns | High quality     |
| Emricasan 5mg BID vs Silymarin 700mg                           | 0 | No concerns   | Undetected | No concerns | Major concerns | No concerns    | No concerns | High quality     |
| Emricasan 5mg BID vs Simtuzumab 125mg SQ weekly                | 0 | Some concerns | Undetected | No concerns | Major concerns | No concerns    | No concerns | Moderate quality |

|                                                                      |   |               |            |             |                |             |             |                  |
|----------------------------------------------------------------------|---|---------------|------------|-------------|----------------|-------------|-------------|------------------|
| Emricasan 5mg BID vs Simtuzumab 200mg IV every other week            | 0 | Some concerns | Undetected | No concerns | Major concerns | No concerns | No concerns | Moderate quality |
| Emricasan 5mg BID vs Simtuzumab 700mg IV every other week            | 0 | Some concerns | Undetected | No concerns | Major concerns | No concerns | No concerns | Moderate quality |
| Emricasan 5mg BID vs Simtuzumab 75mg SQ weekly                       | 0 | Some concerns | Undetected | No concerns | Major concerns | No concerns | No concerns | Moderate quality |
| Emricasan 5mg BID vs Telmisartan 40mg daily                          | 0 | Some concerns | Undetected | No concerns | Major concerns | No concerns | No concerns | Moderate quality |
| Emricasan 5mg BID vs Vitamin E 800 IU daily                          | 0 | No concerns   | Undetected | No concerns | Major concerns | No concerns | No concerns | High quality     |
| Emricasan 5mg BID vs Volixibat 10mg daily                            | 0 | No concerns   | Undetected | No concerns | Major concerns | No concerns | No concerns | High quality     |
| Emricasan 5mg BID vs Volixibat 20mg daily                            | 0 | No concerns   | Undetected | No concerns | Major concerns | No concerns | No concerns | High quality     |
| Emricasan 5mg BID vs Volixibat 5mg daily                             | 0 | No concerns   | Undetected | No concerns | Major concerns | No concerns | No concerns | High quality     |
| Emricasan 5mg BID vs omega 3 PUFA (EPA 1050mg) daily                 | 0 | No concerns   | Undetected | No concerns | Major concerns | No concerns | No concerns | High quality     |
| Emricasan 5mg BID vs omega 3 PUFA (EPA 2160mg) daily                 | 0 | No concerns   | Undetected | No concerns | Major concerns | No concerns | No concerns | High quality     |
| Liraglutide 1.8mg daily vs Losartan 50mg daily                       | 0 | No concerns   | Undetected | No concerns | Major concerns | No concerns | No concerns | High quality     |
| Liraglutide 1.8mg daily vs Metadoxine 500mg BID                      | 0 | Some concerns | Undetected | No concerns | Major concerns | No concerns | No concerns | Moderate quality |
| Liraglutide 1.8mg daily vs Obeticholic acid 10mg daily               | 0 | No concerns   | Undetected | No concerns | Major concerns | No concerns | No concerns | High quality     |
| Liraglutide 1.8mg daily vs Obeticholic acid 25mg daily               | 0 | No concerns   | Undetected | No concerns | Major concerns | No concerns | No concerns | High quality     |
| Liraglutide 1.8mg daily vs Pentoxifylline 400mg TID                  | 0 | No concerns   | Undetected | No concerns | Major concerns | No concerns | No concerns | High quality     |
| Liraglutide 1.8mg daily vs Pioglitazone 30mg daily                   | 0 | No concerns   | Undetected | No concerns | Major concerns | No concerns | No concerns | High quality     |
| Liraglutide 1.8mg daily vs Pioglitazone 45mg daily                   | 0 | No concerns   | Undetected | No concerns | Major concerns | No concerns | No concerns | High quality     |
| Liraglutide 1.8mg daily vs Rosiglitazone 8mg and Losartan 50mg daily | 0 | Some concerns | Undetected | No concerns | Major concerns | No concerns | No concerns | Moderate quality |
| Liraglutide 1.8mg daily vs Rosiglitazone 8mg and Metformin 500mg BID | 0 | Some concerns | Undetected | No concerns | Major concerns | No concerns | No concerns | Moderate quality |
| Liraglutide 1.8mg daily vs Rosiglitazone 8mg daily                   | 0 | No concerns   | Undetected | No concerns | Major concerns | No concerns | No concerns | High quality     |
| Liraglutide 1.8mg daily vs Selonsertib 18mg daily                    | 0 | No concerns   | Undetected | No concerns | Major concerns | No concerns | No concerns | High quality     |
| Liraglutide 1.8mg daily vs Selonsertib 6mg daily                     | 0 | No concerns   | Undetected | No concerns | Major concerns | No concerns | No concerns | High quality     |
| Liraglutide 1.8mg daily vs Silymarin 420mg                           | 0 | No concerns   | Undetected | No concerns | Major concerns | No concerns | No concerns | High quality     |
| Liraglutide 1.8mg daily vs Silymarin 700mg                           | 0 | No concerns   | Undetected | No concerns | Major concerns | No concerns | No concerns | High quality     |
| Liraglutide 1.8mg daily vs Simtuzumab 125mg SQ weekly                | 0 | Some concerns | Undetected | No concerns | Major concerns | No concerns | No concerns | Moderate quality |
| Liraglutide 1.8mg daily vs Simtuzumab 200mg IV every other week      | 0 | Some concerns | Undetected | No concerns | Major concerns | No concerns | No concerns | Moderate quality |



|                                                                  |   |               |            |             |                |             |             |                  |
|------------------------------------------------------------------|---|---------------|------------|-------------|----------------|-------------|-------------|------------------|
| Liraglutide 1.8mg daily vs Simtuzumab 700mg IV every other week  | 0 | Some concerns | Undetected | No concerns | Major concerns | No concerns | No concerns | Moderate quality |
| Liraglutide 1.8mg daily vs Simtuzumab 75mg SQ weekly             | 0 | Some concerns | Undetected | No concerns | Major concerns | No concerns | No concerns | Moderate quality |
| Liraglutide 1.8mg daily vs Telmisartan 40mg daily                | 0 | Some concerns | Undetected | No concerns | Major concerns | No concerns | No concerns | Moderate quality |
| Liraglutide 1.8mg daily vs Vitamin E 800 IU daily                | 0 | No concerns   | Undetected | No concerns | Major concerns | No concerns | No concerns | High quality     |
| Liraglutide 1.8mg daily vs Volixibat 10mg daily                  | 0 | No concerns   | Undetected | No concerns | Major concerns | No concerns | No concerns | High quality     |
| Liraglutide 1.8mg daily vs Volixibat 20mg daily                  | 0 | No concerns   | Undetected | No concerns | Major concerns | No concerns | No concerns | High quality     |
| Liraglutide 1.8mg daily vs Volixibat 5mg daily                   | 0 | No concerns   | Undetected | No concerns | Major concerns | No concerns | No concerns | High quality     |
| Liraglutide 1.8mg daily vs omega 3 PUFA (EPA 1050mg) daily       | 0 | No concerns   | Undetected | No concerns | Major concerns | No concerns | No concerns | High quality     |
| Liraglutide 1.8mg daily vs omega 3 PUFA (EPA 2160mg) daily       | 0 | No concerns   | Undetected | No concerns | Major concerns | No concerns | No concerns | High quality     |
| Losartan 50mg daily vs Metadoxine 500mg BID                      | 0 | Some concerns | Undetected | No concerns | Major concerns | No concerns | No concerns | Moderate quality |
| Losartan 50mg daily vs Obeticholic acid 10mg daily               | 0 | No concerns   | Undetected | No concerns | Major concerns | No concerns | No concerns | High quality     |
| Losartan 50mg daily vs Obeticholic acid 25mg daily               | 0 | No concerns   | Undetected | No concerns | Major concerns | No concerns | No concerns | High quality     |
| Losartan 50mg daily vs Pentoxifylline 400mg TID                  | 0 | No concerns   | Undetected | No concerns | Major concerns | No concerns | No concerns | High quality     |
| Losartan 50mg daily vs Pioglitazone 30mg daily                   | 0 | No concerns   | Undetected | No concerns | Major concerns | No concerns | No concerns | High quality     |
| Losartan 50mg daily vs Pioglitazone 45mg daily                   | 0 | No concerns   | Undetected | No concerns | Major concerns | No concerns | No concerns | High quality     |
| Losartan 50mg daily vs Rosiglitazone 8mg and Losartan 50mg daily | 0 | Some concerns | Undetected | No concerns | Major concerns | No concerns | No concerns | Moderate quality |
| Losartan 50mg daily vs Rosiglitazone 8mg and Metformin 500mg BID | 0 | Some concerns | Undetected | No concerns | Major concerns | No concerns | No concerns | Moderate quality |
| Losartan 50mg daily vs Rosiglitazone 8mg daily                   | 0 | No concerns   | Undetected | No concerns | Major concerns | No concerns | No concerns | High quality     |
| Losartan 50mg daily vs Selonsertib 18mg daily                    | 0 | No concerns   | Undetected | No concerns | Major concerns | No concerns | No concerns | High quality     |
| Losartan 50mg daily vs Selonsertib 6mg daily                     | 0 | No concerns   | Undetected | No concerns | Major concerns | No concerns | No concerns | High quality     |
| Losartan 50mg daily vs Silymarin 420mg                           | 0 | No concerns   | Undetected | No concerns | Major concerns | No concerns | No concerns | High quality     |
| Losartan 50mg daily vs Silymarin 700mg                           | 0 | No concerns   | Undetected | No concerns | Major concerns | No concerns | No concerns | High quality     |
| Losartan 50mg daily vs Simtuzumab 125mg SQ weekly                | 0 | Some concerns | Undetected | No concerns | Major concerns | No concerns | No concerns | Moderate quality |
| Losartan 50mg daily vs Simtuzumab 200mg IV every other week      | 0 | Some concerns | Undetected | No concerns | Major concerns | No concerns | No concerns | Moderate quality |
| Losartan 50mg daily vs Simtuzumab 700mg IV every other week      | 0 | Some concerns | Undetected | No concerns | Major concerns | No concerns | No concerns | Moderate quality |
| Losartan 50mg daily vs Simtuzumab 75mg SQ weekly                 | 0 | Some concerns | Undetected | No concerns | Major concerns | No concerns | No concerns | Moderate quality |



|                                                                   |   |                |            |             |                |             |             |                  |
|-------------------------------------------------------------------|---|----------------|------------|-------------|----------------|-------------|-------------|------------------|
| Losartan 50mg daily vs Telmisartan 40mg daily                     | 0 | Some concerns  | Undetected | No concerns | Major concerns | No concerns | No concerns | Moderate quality |
| Losartan 50mg daily vs Vitamin E 800 IU daily                     | 0 | No concerns    | Undetected | No concerns | Major concerns | No concerns | No concerns | High quality     |
| Losartan 50mg daily vs Volixibat 10mg daily                       | 0 | No concerns    | Undetected | No concerns | Major concerns | No concerns | No concerns | High quality     |
| Losartan 50mg daily vs Volixibat 20mg daily                       | 0 | No concerns    | Undetected | No concerns | Major concerns | No concerns | No concerns | High quality     |
| Losartan 50mg daily vs Volixibat 5mg daily                        | 0 | No concerns    | Undetected | No concerns | Major concerns | No concerns | No concerns | High quality     |
| Losartan 50mg daily vs omega 3 PUFA (EPA 1050mg) daily            | 0 | No concerns    | Undetected | No concerns | Major concerns | No concerns | No concerns | High quality     |
| Losartan 50mg daily vs omega 3 PUFA (EPA 2160mg) daily            | 0 | No concerns    | Undetected | No concerns | Major concerns | No concerns | No concerns | High quality     |
| Metadoxine 500mg BID vs Obeticholic acid 10mg daily               | 0 | No concerns    | Undetected | No concerns | Major concerns | No concerns | No concerns | High quality     |
| Metadoxine 500mg BID vs Obeticholic acid 25mg daily               | 0 | No concerns    | Undetected | No concerns | Major concerns | No concerns | No concerns | High quality     |
| Metadoxine 500mg BID vs Pentoxifylline 400mg TID                  | 0 | Some concerns  | Undetected | No concerns | Major concerns | No concerns | No concerns | Moderate quality |
| Metadoxine 500mg BID vs Pioglitazone 30mg daily                   | 0 | No concerns    | Undetected | No concerns | Major concerns | No concerns | No concerns | High quality     |
| Metadoxine 500mg BID vs Pioglitazone 45mg daily                   | 0 | Some concerns  | Undetected | No concerns | Major concerns | No concerns | No concerns | Moderate quality |
| Metadoxine 500mg BID vs Rosiglitazone 8mg and Losartan 50mg daily | 0 | Some concerns  | Undetected | No concerns | Major concerns | No concerns | No concerns | Moderate quality |
| Metadoxine 500mg BID vs Rosiglitazone 8mg and Metformin 500mg BID | 0 | Some concerns  | Undetected | No concerns | Major concerns | No concerns | No concerns | Moderate quality |
| Metadoxine 500mg BID vs Rosiglitazone 8mg daily                   | 0 | Some concerns  | Undetected | No concerns | Major concerns | No concerns | No concerns | Moderate quality |
| Metadoxine 500mg BID vs Selonsertib 18mg daily                    | 0 | No concerns    | Undetected | No concerns | Major concerns | No concerns | No concerns | High quality     |
| Metadoxine 500mg BID vs Selonsertib 6mg daily                     | 0 | No concerns    | Undetected | No concerns | Major concerns | No concerns | No concerns | High quality     |
| Metadoxine 500mg BID vs Silymarin 420mg                           | 0 | No concerns    | Undetected | No concerns | Major concerns | No concerns | No concerns | High quality     |
| Metadoxine 500mg BID vs Silymarin 700mg                           | 0 | No concerns    | Undetected | No concerns | Major concerns | No concerns | No concerns | High quality     |
| Metadoxine 500mg BID vs Simtuzumab 125mg SQ weekly                | 0 | Some concerns  | Undetected | No concerns | Major concerns | No concerns | No concerns | Moderate quality |
| Metadoxine 500mg BID vs Simtuzumab 200mg IV every other week      | 0 | Some concerns  | Undetected | No concerns | Major concerns | No concerns | No concerns | Moderate quality |
| Metadoxine 500mg BID vs Simtuzumab 700mg IV every other week      | 0 | Some concerns  | Undetected | No concerns | Major concerns | No concerns | No concerns | Moderate quality |
| Metadoxine 500mg BID vs Simtuzumab 75mg SQ weekly                 | 0 | Some concerns  | Undetected | No concerns | Major concerns | No concerns | No concerns | Moderate quality |
| Metadoxine 500mg BID vs Telmisartan 40mg daily                    | 0 | Major concerns | Undetected | No concerns | Major concerns | No concerns | No concerns | Low quality      |
| Metadoxine 500mg BID vs Vitamin E 800 IU daily                    | 0 | No concerns    | Undetected | No concerns | Major concerns | No concerns | No concerns | High quality     |

|                                                                          |   |               |            |             |                |             |             |                  |
|--------------------------------------------------------------------------|---|---------------|------------|-------------|----------------|-------------|-------------|------------------|
| Metadoxine 500mg BID vs Volixibat 10mg daily                             | 0 | No concerns   | Undetected | No concerns | Major concerns | No concerns | No concerns | High quality     |
| Metadoxine 500mg BID vs Volixibat 20mg daily                             | 0 | No concerns   | Undetected | No concerns | Major concerns | No concerns | No concerns | High quality     |
| Metadoxine 500mg BID vs Volixibat 5mg daily                              | 0 | No concerns   | Undetected | No concerns | Major concerns | No concerns | No concerns | High quality     |
| Metadoxine 500mg BID vs omega 3 PUFA (EPA 1050mg) daily                  | 0 | Some concerns | Undetected | No concerns | Major concerns | No concerns | No concerns | Moderate quality |
| Metadoxine 500mg BID vs omega 3 PUFA (EPA 2160mg) daily                  | 0 | Some concerns | Undetected | No concerns | Major concerns | No concerns | No concerns | Moderate quality |
| Obeticholic acid 10mg daily vs Pentoxifylline 400mg TID                  | 0 | No concerns   | Undetected | No concerns | Major concerns | No concerns | No concerns | High quality     |
| Obeticholic acid 10mg daily vs Pioglitazone 30mg daily                   | 0 | No concerns   | Undetected | No concerns | Major concerns | No concerns | No concerns | High quality     |
| Obeticholic acid 10mg daily vs Pioglitazone 45mg daily                   | 0 | No concerns   | Undetected | No concerns | Major concerns | No concerns | No concerns | High quality     |
| Obeticholic acid 10mg daily vs Rosiglitazone 8mg and Losartan 50mg daily | 0 | Some concerns | Undetected | No concerns | Major concerns | No concerns | No concerns | Moderate quality |
| Obeticholic acid 10mg daily vs Rosiglitazone 8mg and Metformin 500mg BID | 0 | Some concerns | Undetected | No concerns | Major concerns | No concerns | No concerns | Moderate quality |
| Obeticholic acid 10mg daily vs Rosiglitazone 8mg daily                   | 0 | No concerns   | Undetected | No concerns | Major concerns | No concerns | No concerns | High quality     |
| Obeticholic acid 10mg daily vs Selonsertib 18mg daily                    | 0 | No concerns   | Undetected | No concerns | Major concerns | No concerns | No concerns | High quality     |
| Obeticholic acid 10mg daily vs Selonsertib 6mg daily                     | 0 | No concerns   | Undetected | No concerns | Major concerns | No concerns | No concerns | High quality     |
| Obeticholic acid 10mg daily vs Silymarin 420mg                           | 0 | No concerns   | Undetected | No concerns | Major concerns | No concerns | No concerns | High quality     |
| Obeticholic acid 10mg daily vs Silymarin 700mg                           | 0 | No concerns   | Undetected | No concerns | Major concerns | No concerns | No concerns | High quality     |
| Obeticholic acid 10mg daily vs Simtuzumab 125mg SQ weekly                | 0 | No concerns   | Undetected | No concerns | Major concerns | No concerns | No concerns | High quality     |
| Obeticholic acid 10mg daily vs Simtuzumab 200mg IV every other week      | 0 | No concerns   | Undetected | No concerns | Major concerns | No concerns | No concerns | High quality     |
| Obeticholic acid 10mg daily vs Simtuzumab 700mg IV every other week      | 0 | No concerns   | Undetected | No concerns | Major concerns | No concerns | No concerns | High quality     |
| Obeticholic acid 10mg daily vs Simtuzumab 75mg SQ weekly                 | 0 | No concerns   | Undetected | No concerns | Major concerns | No concerns | No concerns | High quality     |
| Obeticholic acid 10mg daily vs Telmisartan 40mg daily                    | 0 | Some concerns | Undetected | No concerns | Major concerns | No concerns | No concerns | Moderate quality |
| Obeticholic acid 10mg daily vs Vitamin E 800 IU daily                    | 0 | No concerns   | Undetected | No concerns | Major concerns | No concerns | No concerns | High quality     |
| Obeticholic acid 10mg daily vs Volixibat 10mg daily                      | 0 | No concerns   | Undetected | No concerns | Major concerns | No concerns | No concerns | High quality     |
| Obeticholic acid 10mg daily vs Volixibat 20mg daily                      | 0 | No concerns   | Undetected | No concerns | Major concerns | No concerns | No concerns | High quality     |
| Obeticholic acid 10mg daily vs Volixibat 5mg daily                       | 0 | No concerns   | Undetected | No concerns | Major concerns | No concerns | No concerns | High quality     |

|                                                                          |   |               |            |             |                |                |             |                  |
|--------------------------------------------------------------------------|---|---------------|------------|-------------|----------------|----------------|-------------|------------------|
| Obeticholic acid 10mg daily vs omega 3 PUFA (EPA 1050mg) daily           | 0 | No concerns   | Undetected | No concerns | Major concerns | No concerns    | No concerns | High quality     |
| Obeticholic acid 10mg daily vs omega 3 PUFA (EPA 2160mg) daily           | 0 | No concerns   | Undetected | No concerns | Major concerns | No concerns    | No concerns | High quality     |
| Obeticholic acid 25mg daily vs Pentoxifylline 400mg TID                  | 0 | No concerns   | Undetected | No concerns | Major concerns | No concerns    | No concerns | High quality     |
| Obeticholic acid 25mg daily vs Pioglitazone 30mg daily                   | 0 | No concerns   | Undetected | No concerns | Major concerns | No concerns    | No concerns | High quality     |
| Obeticholic acid 25mg daily vs Pioglitazone 45mg daily                   | 0 | No concerns   | Undetected | No concerns | Major concerns | No concerns    | No concerns | High quality     |
| Obeticholic acid 25mg daily vs Rosiglitazone 8mg and Losartan 50mg daily | 0 | Some concerns | Undetected | No concerns | Major concerns | No concerns    | No concerns | Moderate quality |
| Obeticholic acid 25mg daily vs Rosiglitazone 8mg and Metformin 500mg BID | 0 | Some concerns | Undetected | No concerns | Major concerns | No concerns    | No concerns | Moderate quality |
| Obeticholic acid 25mg daily vs Rosiglitazone 8mg daily                   | 0 | No concerns   | Undetected | No concerns | Major concerns | No concerns    | No concerns | High quality     |
| Obeticholic acid 25mg daily vs Selonsertib 18mg daily                    | 0 | No concerns   | Undetected | No concerns | No concerns    | Major concerns | No concerns | High quality     |
| Obeticholic acid 25mg daily vs Selonsertib 6mg daily                     | 0 | No concerns   | Undetected | No concerns | No concerns    | Major concerns | No concerns | High quality     |
| Obeticholic acid 25mg daily vs Silymarin 420mg                           | 0 | No concerns   | Undetected | No concerns | No concerns    | Major concerns | No concerns | High quality     |
| Obeticholic acid 25mg daily vs Silymarin 700mg                           | 0 | No concerns   | Undetected | No concerns | Major concerns | No concerns    | No concerns | High quality     |
| Obeticholic acid 25mg daily vs Simtuzumab 125mg SQ weekly                | 0 | Some concerns | Undetected | No concerns | No concerns    | Major concerns | No concerns | Moderate quality |
| Obeticholic acid 25mg daily vs Simtuzumab 200mg IV every other week      | 0 | Some concerns | Undetected | No concerns | Major concerns | No concerns    | No concerns | Moderate quality |
| Obeticholic acid 25mg daily vs Simtuzumab 700mg IV every other week      | 0 | Some concerns | Undetected | No concerns | Major concerns | No concerns    | No concerns | Moderate quality |
| Obeticholic acid 25mg daily vs Simtuzumab 75mg SQ weekly                 | 0 | Some concerns | Undetected | No concerns | Major concerns | No concerns    | No concerns | Moderate quality |
| Obeticholic acid 25mg daily vs Telmisartan 40mg daily                    | 0 | Some concerns | Undetected | No concerns | Major concerns | No concerns    | No concerns | Moderate quality |
| Obeticholic acid 25mg daily vs Vitamin E 800 IU daily                    | 0 | No concerns   | Undetected | No concerns | Major concerns | No concerns    | No concerns | High quality     |
| Obeticholic acid 25mg daily vs Volixibat 10mg daily                      | 0 | No concerns   | Undetected | No concerns | Major concerns | No concerns    | No concerns | High quality     |
| Obeticholic acid 25mg daily vs Volixibat 20mg daily                      | 0 | No concerns   | Undetected | No concerns | Major concerns | No concerns    | No concerns | High quality     |
| Obeticholic acid 25mg daily vs Volixibat 5mg daily                       | 0 | No concerns   | Undetected | No concerns | Major concerns | No concerns    | No concerns | High quality     |
| Obeticholic acid 25mg daily vs omega 3 PUFA (EPA 1050mg) daily           | 0 | No concerns   | Undetected | No concerns | Major concerns | No concerns    | No concerns | High quality     |
| Obeticholic acid 25mg daily vs omega 3 PUFA (EPA 2160mg) daily           | 0 | No concerns   | Undetected | No concerns | Major concerns | No concerns    | No concerns | High quality     |
| Pentoxifylline 400mg TID vs Pioglitazone 30mg daily                      | 0 | No concerns   | Undetected | No concerns | Major concerns | No concerns    | No concerns | High quality     |

|                                                                       |   |               |            |             |                |                |             |                  |
|-----------------------------------------------------------------------|---|---------------|------------|-------------|----------------|----------------|-------------|------------------|
| Pentoxifylline 400mg TID vs Pioglitazone 45mg daily                   | 0 | No concerns   | Undetected | No concerns | Major concerns | No concerns    | No concerns | High quality     |
| Pentoxifylline 400mg TID vs Rosiglitazone 8mg and Losartan 50mg daily | 0 | Some concerns | Undetected | No concerns | Major concerns | No concerns    | No concerns | Moderate quality |
| Pentoxifylline 400mg TID vs Rosiglitazone 8mg and Metformin 500mg BID | 0 | Some concerns | Undetected | No concerns | Major concerns | No concerns    | No concerns | Moderate quality |
| Pentoxifylline 400mg TID vs Rosiglitazone 8mg daily                   | 0 | No concerns   | Undetected | No concerns | Major concerns | No concerns    | No concerns | High quality     |
| Pentoxifylline 400mg TID vs Selonsertib 18mg daily                    | 0 | No concerns   | Undetected | No concerns | Major concerns | No concerns    | No concerns | High quality     |
| Pentoxifylline 400mg TID vs Selonsertib 6mg daily                     | 0 | No concerns   | Undetected | No concerns | Major concerns | No concerns    | No concerns | High quality     |
| Pentoxifylline 400mg TID vs Silymarin 420mg                           | 0 | No concerns   | Undetected | No concerns | No concerns    | Major concerns | No concerns | High quality     |
| Pentoxifylline 400mg TID vs Silymarin 700mg                           | 0 | No concerns   | Undetected | No concerns | Major concerns | No concerns    | No concerns | High quality     |
| Pentoxifylline 400mg TID vs Simtuzumab 125mg SQ weekly                | 0 | Some concerns | Undetected | No concerns | Major concerns | No concerns    | No concerns | Moderate quality |
| Pentoxifylline 400mg TID vs Simtuzumab 200mg IV every other week      | 0 | Some concerns | Undetected | No concerns | Major concerns | No concerns    | No concerns | Moderate quality |
| Pentoxifylline 400mg TID vs Simtuzumab 700mg IV every other week      | 0 | Some concerns | Undetected | No concerns | Major concerns | No concerns    | No concerns | Moderate quality |
| Pentoxifylline 400mg TID vs Simtuzumab 75mg SQ weekly                 | 0 | Some concerns | Undetected | No concerns | Major concerns | No concerns    | No concerns | Moderate quality |
| Pentoxifylline 400mg TID vs Telmisartan 40mg daily                    | 0 | Some concerns | Undetected | No concerns | Major concerns | No concerns    | No concerns | Moderate quality |
| Pentoxifylline 400mg TID vs Vitamin E 800 IU daily                    | 0 | No concerns   | Undetected | No concerns | Major concerns | No concerns    | No concerns | High quality     |
| Pentoxifylline 400mg TID vs Volixibat 10mg daily                      | 0 | No concerns   | Undetected | No concerns | Major concerns | No concerns    | No concerns | High quality     |
| Pentoxifylline 400mg TID vs Volixibat 20mg daily                      | 0 | No concerns   | Undetected | No concerns | Major concerns | No concerns    | No concerns | High quality     |
| Pentoxifylline 400mg TID vs Volixibat 5mg daily                       | 0 | No concerns   | Undetected | No concerns | Major concerns | No concerns    | No concerns | High quality     |
| omega 3 PUFA (EPA 1050mg) daily vs Pentoxifylline 400mg TID           | 0 | No concerns   | Undetected | No concerns | Major concerns | No concerns    | No concerns | High quality     |
| omega 3 PUFA (EPA 2160mg) daily vs Pentoxifylline 400mg TID           | 0 | No concerns   | Undetected | No concerns | Major concerns | No concerns    | No concerns | High quality     |
| Pioglitazone 30mg daily vs Pioglitazone 45mg daily                    | 0 | No concerns   | Undetected | No concerns | Major concerns | No concerns    | No concerns | High quality     |
| Pioglitazone 30mg daily vs Rosiglitazone 8mg and Losartan 50mg daily  | 0 | Some concerns | Undetected | No concerns | Major concerns | No concerns    | No concerns | Moderate quality |
| Pioglitazone 30mg daily vs Rosiglitazone 8mg and Metformin 500mg BID  | 0 | Some concerns | Undetected | No concerns | Major concerns | No concerns    | No concerns | Moderate quality |
| Pioglitazone 30mg daily vs Rosiglitazone 8mg daily                    | 0 | No concerns   | Undetected | No concerns | Major concerns | No concerns    | No concerns | High quality     |

|                                                                      |   |               |            |             |                |             |             |                  |
|----------------------------------------------------------------------|---|---------------|------------|-------------|----------------|-------------|-------------|------------------|
| Pioglitazone 30mg daily vs Selonsertib 18mg daily                    | 0 | No concerns   | Undetected | No concerns | Major concerns | No concerns | No concerns | High quality     |
| Pioglitazone 30mg daily vs Selonsertib 6mg daily                     | 0 | No concerns   | Undetected | No concerns | Major concerns | No concerns | No concerns | High quality     |
| Pioglitazone 30mg daily vs Silymarin 420mg                           | 0 | No concerns   | Undetected | No concerns | Major concerns | No concerns | No concerns | High quality     |
| Pioglitazone 30mg daily vs Silymarin 700mg                           | 0 | No concerns   | Undetected | No concerns | Major concerns | No concerns | No concerns | High quality     |
| Pioglitazone 30mg daily vs Simtuzumab 125mg SQ weekly                | 0 | No concerns   | Undetected | No concerns | Major concerns | No concerns | No concerns | High quality     |
| Pioglitazone 30mg daily vs Simtuzumab 200mg IV every other week      | 0 | Some concerns | Undetected | No concerns | Major concerns | No concerns | No concerns | Moderate quality |
| Pioglitazone 30mg daily vs Simtuzumab 700mg IV every other week      | 0 | No concerns   | Undetected | No concerns | Major concerns | No concerns | No concerns | High quality     |
| Pioglitazone 30mg daily vs Simtuzumab 75mg SQ weekly                 | 0 | No concerns   | Undetected | No concerns | Major concerns | No concerns | No concerns | High quality     |
| Pioglitazone 30mg daily vs Telmisartan 40mg daily                    | 0 | Some concerns | Undetected | No concerns | Major concerns | No concerns | No concerns | Moderate quality |
| Pioglitazone 30mg daily vs Volixibat 10mg daily                      | 0 | No concerns   | Undetected | No concerns | Major concerns | No concerns | No concerns | High quality     |
| Pioglitazone 30mg daily vs Volixibat 20mg daily                      | 0 | No concerns   | Undetected | No concerns | Major concerns | No concerns | No concerns | High quality     |
| Pioglitazone 30mg daily vs Volixibat 5mg daily                       | 0 | No concerns   | Undetected | No concerns | Major concerns | No concerns | No concerns | High quality     |
| omega 3 PUFA (EPA 1050mg) daily vs Pioglitazone 30mg daily           | 0 | No concerns   | Undetected | No concerns | Major concerns | No concerns | No concerns | High quality     |
| omega 3 PUFA (EPA 2160mg) daily vs Pioglitazone 30mg daily           | 0 | No concerns   | Undetected | No concerns | Major concerns | No concerns | No concerns | High quality     |
| Pioglitazone 45mg daily vs Rosiglitazone 8mg and Losartan 50mg daily | 0 | Some concerns | Undetected | No concerns | Major concerns | No concerns | No concerns | Moderate quality |
| Pioglitazone 45mg daily vs Rosiglitazone 8mg and Metformin 500mg BID | 0 | Some concerns | Undetected | No concerns | Major concerns | No concerns | No concerns | Moderate quality |
| Pioglitazone 45mg daily vs Rosiglitazone 8mg daily                   | 0 | No concerns   | Undetected | No concerns | Major concerns | No concerns | No concerns | High quality     |
| Pioglitazone 45mg daily vs Selonsertib 18mg daily                    | 0 | No concerns   | Undetected | No concerns | Major concerns | No concerns | No concerns | High quality     |
| Pioglitazone 45mg daily vs Selonsertib 6mg daily                     | 0 | No concerns   | Undetected | No concerns | Major concerns | No concerns | No concerns | High quality     |
| Pioglitazone 45mg daily vs Silymarin 420mg                           | 0 | No concerns   | Undetected | No concerns | Major concerns | No concerns | No concerns | High quality     |
| Pioglitazone 45mg daily vs Silymarin 700mg                           | 0 | No concerns   | Undetected | No concerns | Major concerns | No concerns | No concerns | High quality     |
| Pioglitazone 45mg daily vs Simtuzumab 125mg SQ weekly                | 0 | Some concerns | Undetected | No concerns | Major concerns | No concerns | No concerns | Moderate quality |
| Pioglitazone 45mg daily vs Simtuzumab 200mg IV every other week      | 0 | Some concerns | Undetected | No concerns | Major concerns | No concerns | No concerns | Moderate quality |
| Pioglitazone 45mg daily vs Simtuzumab 700mg IV every other week      | 0 | Some concerns | Undetected | No concerns | Major concerns | No concerns | No concerns | Moderate quality |
| Pioglitazone 45mg daily vs Simtuzumab 75mg SQ weekly                 | 0 | Some concerns | Undetected | No concerns | Major concerns | No concerns | No concerns | Moderate quality |

|                                                                                   |   |               |            |             |                |             |             |                  |
|-----------------------------------------------------------------------------------|---|---------------|------------|-------------|----------------|-------------|-------------|------------------|
| Pioglitazone 45mg daily vs Telmisartan 40mg daily                                 | 0 | Some concerns | Undetected | No concerns | Major concerns | No concerns | No concerns | Moderate quality |
| Pioglitazone 45mg daily vs Vitamin E 800 IU daily                                 | 0 | No concerns   | Undetected | No concerns | Major concerns | No concerns | No concerns | High quality     |
| Pioglitazone 45mg daily vs Volixibat 10mg daily                                   | 0 | No concerns   | Undetected | No concerns | Major concerns | No concerns | No concerns | High quality     |
| Pioglitazone 45mg daily vs Volixibat 20mg daily                                   | 0 | No concerns   | Undetected | No concerns | Major concerns | No concerns | No concerns | High quality     |
| Pioglitazone 45mg daily vs Volixibat 5mg daily                                    | 0 | No concerns   | Undetected | No concerns | Major concerns | No concerns | No concerns | High quality     |
| omega 3 PUFA (EPA 1050mg) daily vs Pioglitazone 45mg daily                        | 0 | No concerns   | Undetected | No concerns | Major concerns | No concerns | No concerns | High quality     |
| omega 3 PUFA (EPA 2160mg) daily vs Pioglitazone 45mg daily                        | 0 | No concerns   | Undetected | No concerns | Major concerns | No concerns | No concerns | High quality     |
| Placebo vs Rosiglitazone 8mg and Losartan 50mg daily                              | 0 | Some concerns | Undetected | No concerns | Major concerns | No concerns | No concerns | Moderate quality |
| Placebo vs Rosiglitazone 8mg and Metformin 500mg BID                              | 0 | Some concerns | Undetected | No concerns | Major concerns | No concerns | No concerns | Moderate quality |
| Rosiglitazone 8mg and Losartan 50mg daily vs Selonsertib 18mg daily               | 0 | Some concerns | Undetected | No concerns | Major concerns | No concerns | No concerns | Moderate quality |
| Rosiglitazone 8mg and Losartan 50mg daily vs Selonsertib 6mg daily                | 0 | Some concerns | Undetected | No concerns | Major concerns | No concerns | No concerns | Moderate quality |
| Rosiglitazone 8mg and Losartan 50mg daily vs Silymarin 420mg                      | 0 | Some concerns | Undetected | No concerns | Major concerns | No concerns | No concerns | Moderate quality |
| Rosiglitazone 8mg and Losartan 50mg daily vs Silymarin 700mg                      | 0 | Some concerns | Undetected | No concerns | Major concerns | No concerns | No concerns | Moderate quality |
| Rosiglitazone 8mg and Losartan 50mg daily vs Simtuzumab 125mg SQ weekly           | 0 | Some concerns | Undetected | No concerns | Major concerns | No concerns | No concerns | Moderate quality |
| Rosiglitazone 8mg and Losartan 50mg daily vs Simtuzumab 200mg IV every other week | 0 | Some concerns | Undetected | No concerns | Major concerns | No concerns | No concerns | Moderate quality |
| Rosiglitazone 8mg and Losartan 50mg daily vs Simtuzumab 700mg IV every other week | 0 | Some concerns | Undetected | No concerns | Major concerns | No concerns | No concerns | Moderate quality |
| Rosiglitazone 8mg and Losartan 50mg daily vs Simtuzumab 75mg SQ weekly            | 0 | Some concerns | Undetected | No concerns | Major concerns | No concerns | No concerns | Moderate quality |
| Rosiglitazone 8mg and Losartan 50mg daily vs Telmisartan 40mg daily               | 0 | Some concerns | Undetected | No concerns | Major concerns | No concerns | No concerns | Moderate quality |
| Rosiglitazone 8mg and Losartan 50mg daily vs Vitamin E 800 IU daily               | 0 | Some concerns | Undetected | No concerns | Major concerns | No concerns | No concerns | Moderate quality |
| Rosiglitazone 8mg and Losartan 50mg daily vs Volixibat 10mg daily                 | 0 | Some concerns | Undetected | No concerns | Major concerns | No concerns | No concerns | Moderate quality |
| Rosiglitazone 8mg and Losartan 50mg daily vs Volixibat 20mg daily                 | 0 | Some concerns | Undetected | No concerns | Major concerns | No concerns | No concerns | Moderate quality |
| Rosiglitazone 8mg and Losartan 50mg daily vs Volixibat 5mg daily                  | 0 | Some concerns | Undetected | No concerns | Major concerns | No concerns | No concerns | Moderate quality |
| omega 3 PUFA (EPA 1050mg) daily vs Rosiglitazone 8mg and Losartan 50mg daily      | 0 | Some concerns | Undetected | No concerns | Major concerns | No concerns | No concerns | Moderate quality |
| omega 3 PUFA (EPA 2160mg) daily vs Rosiglitazone 8mg and Losartan 50mg daily      | 0 | Some concerns | Undetected | No concerns | Major concerns | No concerns | No concerns | Moderate quality |

|                                                                                   |   |               |            |             |                |             |             |                  |
|-----------------------------------------------------------------------------------|---|---------------|------------|-------------|----------------|-------------|-------------|------------------|
| Rosiglitazone 8mg and Metformin 500mg BID vs Selonsertib 18mg daily               | 0 | Some concerns | Undetected | No concerns | Major concerns | No concerns | No concerns | Moderate quality |
| Rosiglitazone 8mg and Metformin 500mg BID vs Selonsertib 6mg daily                | 0 | Some concerns | Undetected | No concerns | Major concerns | No concerns | No concerns | Moderate quality |
| Rosiglitazone 8mg and Metformin 500mg BID vs Silymarin 420mg                      | 0 | Some concerns | Undetected | No concerns | Major concerns | No concerns | No concerns | Moderate quality |
| Rosiglitazone 8mg and Metformin 500mg BID vs Silymarin 700mg                      | 0 | Some concerns | Undetected | No concerns | Major concerns | No concerns | No concerns | Moderate quality |
| Rosiglitazone 8mg and Metformin 500mg BID vs Simtuzumab 125mg SQ weekly           | 0 | Some concerns | Undetected | No concerns | Major concerns | No concerns | No concerns | Moderate quality |
| Rosiglitazone 8mg and Metformin 500mg BID vs Simtuzumab 200mg IV every other week | 0 | Some concerns | Undetected | No concerns | Major concerns | No concerns | No concerns | Moderate quality |
| Rosiglitazone 8mg and Metformin 500mg BID vs Simtuzumab 700mg IV every other week | 0 | Some concerns | Undetected | No concerns | Major concerns | No concerns | No concerns | Moderate quality |
| Rosiglitazone 8mg and Metformin 500mg BID vs Simtuzumab 75mg SQ weekly            | 0 | Some concerns | Undetected | No concerns | Major concerns | No concerns | No concerns | Moderate quality |
| Rosiglitazone 8mg and Metformin 500mg BID vs Telmisartan 40mg daily               | 0 | Some concerns | Undetected | No concerns | Major concerns | No concerns | No concerns | Moderate quality |
| Rosiglitazone 8mg and Metformin 500mg BID vs Vitamin E 800 IU daily               | 0 | Some concerns | Undetected | No concerns | Major concerns | No concerns | No concerns | Moderate quality |
| Rosiglitazone 8mg and Metformin 500mg BID vs Volixibat 10mg daily                 | 0 | Some concerns | Undetected | No concerns | Major concerns | No concerns | No concerns | Moderate quality |
| Rosiglitazone 8mg and Metformin 500mg BID vs Volixibat 20mg daily                 | 0 | Some concerns | Undetected | No concerns | Major concerns | No concerns | No concerns | Moderate quality |
| Rosiglitazone 8mg and Metformin 500mg BID vs Volixibat 5mg daily                  | 0 | Some concerns | Undetected | No concerns | Major concerns | No concerns | No concerns | Moderate quality |
| Rosiglitazone 8mg and Metformin 500mg BID vs omega 3 PUFA (EPA 1050mg) daily vs   | 0 | Some concerns | Undetected | No concerns | Major concerns | No concerns | No concerns | Moderate quality |
| Rosiglitazone 8mg and Metformin 500mg BID vs omega 3 PUFA (EPA 2160mg) daily vs   | 0 | Some concerns | Undetected | No concerns | Major concerns | No concerns | No concerns | Moderate quality |
| Rosiglitazone 8mg daily vs Selonsertib 18mg daily                                 | 0 | No concerns   | Undetected | No concerns | Major concerns | No concerns | No concerns | High quality     |
| Rosiglitazone 8mg daily vs Selonsertib 6mg daily                                  | 0 | No concerns   | Undetected | No concerns | Major concerns | No concerns | No concerns | High quality     |
| Rosiglitazone 8mg daily vs Silymarin 420mg                                        | 0 | No concerns   | Undetected | No concerns | Major concerns | No concerns | No concerns | High quality     |
| Rosiglitazone 8mg daily vs Silymarin 700mg                                        | 0 | No concerns   | Undetected | No concerns | Major concerns | No concerns | No concerns | High quality     |
| Rosiglitazone 8mg daily vs Simtuzumab 125mg SQ weekly                             | 0 | Some concerns | Undetected | No concerns | Major concerns | No concerns | No concerns | Moderate quality |
| Rosiglitazone 8mg daily vs Simtuzumab 200mg IV every other week                   | 0 | Some concerns | Undetected | No concerns | Major concerns | No concerns | No concerns | Moderate quality |
| Rosiglitazone 8mg daily vs Simtuzumab 700mg IV every other week                   | 0 | Some concerns | Undetected | No concerns | Major concerns | No concerns | No concerns | Moderate quality |
| Rosiglitazone 8mg daily vs Simtuzumab 75mg SQ weekly                              | 0 | Some concerns | Undetected | No concerns | Major concerns | No concerns | No concerns | Moderate quality |



|                                                                |   |               |            |             |                |             |             |                  |
|----------------------------------------------------------------|---|---------------|------------|-------------|----------------|-------------|-------------|------------------|
| Rosiglitazone 8mg daily vs Telmisartan 40mg daily              | 0 | Some concerns | Undetected | No concerns | Major concerns | No concerns | No concerns | Moderate quality |
| Rosiglitazone 8mg daily vs Vitamin E 800 IU daily              | 0 | No concerns   | Undetected | No concerns | Major concerns | No concerns | No concerns | High quality     |
| Rosiglitazone 8mg daily vs Volixibat 10mg daily                | 0 | No concerns   | Undetected | No concerns | Major concerns | No concerns | No concerns | High quality     |
| Rosiglitazone 8mg daily vs Volixibat 20mg daily                | 0 | No concerns   | Undetected | No concerns | Major concerns | No concerns | No concerns | High quality     |
| Rosiglitazone 8mg daily vs Volixibat 5mg daily                 | 0 | No concerns   | Undetected | No concerns | Major concerns | No concerns | No concerns | High quality     |
| omega 3 PUFA (EPA 1050mg) daily vs Rosiglitazone 8mg daily     | 0 | No concerns   | Undetected | No concerns | Major concerns | No concerns | No concerns | High quality     |
| omega 3 PUFA (EPA 2160mg) daily vs Rosiglitazone 8mg daily     | 0 | No concerns   | Undetected | No concerns | Major concerns | No concerns | No concerns | High quality     |
| Selonsertib 18mg daily vs Silymarin 420mg                      | 0 | No concerns   | Undetected | No concerns | Major concerns | No concerns | No concerns | High quality     |
| Selonsertib 18mg daily vs Silymarin 700mg                      | 0 | No concerns   | Undetected | No concerns | Major concerns | No concerns | No concerns | High quality     |
| Selonsertib 18mg daily vs Simtuzumab 125mg SQ weekly           | 0 | No concerns   | Undetected | No concerns | Major concerns | No concerns | No concerns | High quality     |
| Selonsertib 18mg daily vs Simtuzumab 200mg IV every other week | 0 | Some concerns | Undetected | No concerns | Major concerns | No concerns | No concerns | Moderate quality |
| Selonsertib 18mg daily vs Simtuzumab 700mg IV every other week | 0 | No concerns   | Undetected | No concerns | Major concerns | No concerns | No concerns | High quality     |
| Selonsertib 18mg daily vs Simtuzumab 75mg SQ weekly            | 0 | No concerns   | Undetected | No concerns | Major concerns | No concerns | No concerns | High quality     |
| Selonsertib 18mg daily vs Telmisartan 40mg daily               | 0 | Some concerns | Undetected | No concerns | Major concerns | No concerns | No concerns | Moderate quality |
| Selonsertib 18mg daily vs Vitamin E 800 IU daily               | 0 | No concerns   | Undetected | No concerns | Major concerns | No concerns | No concerns | High quality     |
| Selonsertib 18mg daily vs Volixibat 10mg daily                 | 0 | No concerns   | Undetected | No concerns | Major concerns | No concerns | No concerns | High quality     |
| Selonsertib 18mg daily vs Volixibat 20mg daily                 | 0 | No concerns   | Undetected | No concerns | Major concerns | No concerns | No concerns | High quality     |
| Selonsertib 18mg daily vs Volixibat 5mg daily                  | 0 | No concerns   | Undetected | No concerns | Major concerns | No concerns | No concerns | High quality     |
| omega 3 PUFA (EPA 1050mg) daily vs Selonsertib 18mg daily      | 0 | No concerns   | Undetected | No concerns | Major concerns | No concerns | No concerns | High quality     |
| omega 3 PUFA (EPA 2160mg) daily vs Selonsertib 18mg daily      | 0 | No concerns   | Undetected | No concerns | Major concerns | No concerns | No concerns | High quality     |
| Selonsertib 6mg daily vs Silymarin 420mg                       | 0 | No concerns   | Undetected | No concerns | Major concerns | No concerns | No concerns | High quality     |
| Selonsertib 6mg daily vs Silymarin 700mg                       | 0 | No concerns   | Undetected | No concerns | Major concerns | No concerns | No concerns | High quality     |
| Selonsertib 6mg daily vs Simtuzumab 125mg SQ weekly            | 0 | No concerns   | Undetected | No concerns | Major concerns | No concerns | No concerns | High quality     |
| Selonsertib 6mg daily vs Simtuzumab 200mg IV every other week  | 0 | Some concerns | Undetected | No concerns | Major concerns | No concerns | No concerns | Moderate quality |
| Selonsertib 6mg daily vs Simtuzumab 700mg IV every other week  | 0 | No concerns   | Undetected | No concerns | Major concerns | No concerns | No concerns | High quality     |
| Selonsertib 6mg daily vs Simtuzumab 75mg SQ weekly             | 0 | No concerns   | Undetected | No concerns | Major concerns | No concerns | No concerns | High quality     |



|                                                          |   |               |            |             |                |                |             |                  |
|----------------------------------------------------------|---|---------------|------------|-------------|----------------|----------------|-------------|------------------|
| Selonsertib 6mg daily vs Telmisartan 40mg daily          | 0 | Some concerns | Undetected | No concerns | Major concerns | No concerns    | No concerns | Moderate quality |
| Selonsertib 6mg daily vs Vitamin E 800 IU daily          | 0 | No concerns   | Undetected | No concerns | Major concerns | No concerns    | No concerns | High quality     |
| Selonsertib 6mg daily vs Volixibat 10mg daily            | 0 | No concerns   | Undetected | No concerns | Major concerns | No concerns    | No concerns | High quality     |
| Selonsertib 6mg daily vs Volixibat 20mg daily            | 0 | No concerns   | Undetected | No concerns | Major concerns | No concerns    | No concerns | High quality     |
| Selonsertib 6mg daily vs Volixibat 5mg daily             | 0 | No concerns   | Undetected | No concerns | Major concerns | No concerns    | No concerns | High quality     |
| omega 3 PUFA (EPA 1050mg) daily vs Selonsertib 6mg daily | 0 | No concerns   | Undetected | No concerns | Major concerns | No concerns    | No concerns | High quality     |
| omega 3 PUFA (EPA 2160mg) daily vs Selonsertib 6mg daily | 0 | No concerns   | Undetected | No concerns | Major concerns | No concerns    | No concerns | High quality     |
| Silymarin 420mg vs Simtuzumab 125mg SQ weekly            | 0 | No concerns   | Undetected | No concerns | Major concerns | No concerns    | No concerns | High quality     |
| Silymarin 420mg vs Simtuzumab 200mg IV every other week  | 0 | No concerns   | Undetected | No concerns | Major concerns | No concerns    | No concerns | High quality     |
| Silymarin 420mg vs Simtuzumab 700mg IV every other week  | 0 | No concerns   | Undetected | No concerns | Major concerns | No concerns    | No concerns | High quality     |
| Silymarin 420mg vs Simtuzumab 75mg SQ weekly             | 0 | No concerns   | Undetected | No concerns | Major concerns | No concerns    | No concerns | High quality     |
| Silymarin 420mg vs Telmisartan 40mg daily                | 0 | Some concerns | Undetected | No concerns | No concerns    | Major concerns | No concerns | Moderate quality |
| Silymarin 420mg vs Vitamin E 800 IU daily                | 0 | No concerns   | Undetected | No concerns | Major concerns | No concerns    | No concerns | High quality     |
| Silymarin 420mg vs Volixibat 10mg daily                  | 0 | No concerns   | Undetected | No concerns | Major concerns | No concerns    | No concerns | High quality     |
| Silymarin 420mg vs Volixibat 20mg daily                  | 0 | No concerns   | Undetected | No concerns | Major concerns | No concerns    | No concerns | High quality     |
| Silymarin 420mg vs Volixibat 5mg daily                   | 0 | No concerns   | Undetected | No concerns | Major concerns | No concerns    | No concerns | High quality     |
| omega 3 PUFA (EPA 1050mg) daily vs Silymarin 420mg       | 0 | No concerns   | Undetected | No concerns | Major concerns | No concerns    | No concerns | High quality     |
| omega 3 PUFA (EPA 2160mg) daily vs Silymarin 420mg       | 0 | No concerns   | Undetected | No concerns | Major concerns | No concerns    | No concerns | High quality     |
| Silymarin 700mg vs Simtuzumab 125mg SQ weekly            | 0 | Some concerns | Undetected | No concerns | Major concerns | No concerns    | No concerns | Moderate quality |
| Silymarin 700mg vs Simtuzumab 200mg IV every other week  | 0 | Some concerns | Undetected | No concerns | Major concerns | No concerns    | No concerns | Moderate quality |
| Silymarin 700mg vs Simtuzumab 700mg IV every other week  | 0 | Some concerns | Undetected | No concerns | Major concerns | No concerns    | No concerns | Moderate quality |
| Silymarin 700mg vs Simtuzumab 75mg SQ weekly             | 0 | Some concerns | Undetected | No concerns | Major concerns | No concerns    | No concerns | Moderate quality |
| Silymarin 700mg vs Telmisartan 40mg daily                | 0 | Some concerns | Undetected | No concerns | Major concerns | No concerns    | No concerns | Moderate quality |
| Silymarin 700mg vs Vitamin E 800 IU daily                | 0 | No concerns   | Undetected | No concerns | Major concerns | No concerns    | No concerns | High quality     |
| Silymarin 700mg vs Volixibat 10mg daily                  | 0 | No concerns   | Undetected | No concerns | Major concerns | No concerns    | No concerns | High quality     |
| Silymarin 700mg vs Volixibat 20mg daily                  | 0 | No concerns   | Undetected | No concerns | Major concerns | No concerns    | No concerns | High quality     |
| Silymarin 700mg vs Volixibat 5mg daily                   | 0 | No concerns   | Undetected | No concerns | Major concerns | No concerns    | No concerns | High quality     |

|                                                                         |   |               |            |             |                |             |             |                  |
|-------------------------------------------------------------------------|---|---------------|------------|-------------|----------------|-------------|-------------|------------------|
| omega 3 PUFA (EPA 1050mg) daily vs Silymarin 700mg                      | 0 | No concerns   | Undetected | No concerns | Major concerns | No concerns | No concerns | High quality     |
| omega 3 PUFA (EPA 2160mg) daily vs Silymarin 700mg                      | 0 | No concerns   | Undetected | No concerns | Major concerns | No concerns | No concerns | High quality     |
| Simtuzumab 125mg SQ weekly vs Simtuzumab 200mg IV every other week      | 0 | Some concerns | Undetected | No concerns | Major concerns | No concerns | No concerns | Moderate quality |
| Simtuzumab 125mg SQ weekly vs Simtuzumab 700mg IV every other week      | 0 | Some concerns | Undetected | No concerns | Major concerns | No concerns | No concerns | Moderate quality |
| Simtuzumab 125mg SQ weekly vs Telmisartan 40mg daily                    | 0 | Some concerns | Undetected | No concerns | Major concerns | No concerns | No concerns | Moderate quality |
| Simtuzumab 125mg SQ weekly vs Vitamin E 800 IU daily                    | 0 | No concerns   | Undetected | No concerns | Major concerns | No concerns | No concerns | High quality     |
| Simtuzumab 125mg SQ weekly vs Volixibat 10mg daily                      | 0 | No concerns   | Undetected | No concerns | Major concerns | No concerns | No concerns | High quality     |
| Simtuzumab 125mg SQ weekly vs Volixibat 20mg daily                      | 0 | No concerns   | Undetected | No concerns | Major concerns | No concerns | No concerns | High quality     |
| Simtuzumab 125mg SQ weekly vs Volixibat 5mg daily                       | 0 | Some concerns | Undetected | No concerns | Major concerns | No concerns | No concerns | Moderate quality |
| omega 3 PUFA (EPA 1050mg) daily vs Simtuzumab 125mg SQ weekly           | 0 | Some concerns | Undetected | No concerns | Major concerns | No concerns | No concerns | Moderate quality |
| omega 3 PUFA (EPA 2160mg) daily vs Simtuzumab 125mg SQ weekly           | 0 | Some concerns | Undetected | No concerns | Major concerns | No concerns | No concerns | Moderate quality |
| Simtuzumab 200mg IV every other week vs Simtuzumab 75mg SQ weekly       | 0 | Some concerns | Undetected | No concerns | Major concerns | No concerns | No concerns | Moderate quality |
| Simtuzumab 200mg IV every other week vs Telmisartan 40mg daily          | 0 | Some concerns | Undetected | No concerns | Major concerns | No concerns | No concerns | Moderate quality |
| Simtuzumab 200mg IV every other week vs Vitamin E 800 IU daily          | 0 | Some concerns | Undetected | No concerns | Major concerns | No concerns | No concerns | Moderate quality |
| Simtuzumab 200mg IV every other week vs Volixibat 10mg daily            | 0 | No concerns   | Undetected | No concerns | Major concerns | No concerns | No concerns | High quality     |
| Simtuzumab 200mg IV every other week vs Volixibat 20mg daily            | 0 | No concerns   | Undetected | No concerns | Major concerns | No concerns | No concerns | High quality     |
| Simtuzumab 200mg IV every other week vs Volixibat 5mg daily             | 0 | Some concerns | Undetected | No concerns | Major concerns | No concerns | No concerns | Moderate quality |
| omega 3 PUFA (EPA 1050mg) daily vs Simtuzumab 200mg IV every other week | 0 | Some concerns | Undetected | No concerns | Major concerns | No concerns | No concerns | Moderate quality |
| omega 3 PUFA (EPA 2160mg) daily vs Simtuzumab 200mg IV every other week | 0 | Some concerns | Undetected | No concerns | Major concerns | No concerns | No concerns | Moderate quality |
| Simtuzumab 700mg IV every other week vs Simtuzumab 75mg SQ weekly       | 0 | Some concerns | Undetected | No concerns | Major concerns | No concerns | No concerns | Moderate quality |
| Simtuzumab 700mg IV every other week vs Telmisartan 40mg daily          | 0 | Some concerns | Undetected | No concerns | Major concerns | No concerns | No concerns | Moderate quality |
| Simtuzumab 700mg IV every other week vs Vitamin E 800 IU daily          | 0 | No concerns   | Undetected | No concerns | Major concerns | No concerns | No concerns | High quality     |
| Simtuzumab 700mg IV every other week vs Volixibat 10mg daily            | 0 | No concerns   | Undetected | No concerns | Major concerns | No concerns | No concerns | High quality     |
| Simtuzumab 700mg IV every other week vs Volixibat 20mg daily            | 0 | No concerns   | Undetected | No concerns | Major concerns | No concerns | No concerns | High quality     |

|                                                                         |   |               |            |             |                |             |             |                  |
|-------------------------------------------------------------------------|---|---------------|------------|-------------|----------------|-------------|-------------|------------------|
| Simtuzumab 700mg IV every other week vs Volixibat 5mg daily             | 0 | Some concerns | Undetected | No concerns | Major concerns | No concerns | No concerns | Moderate quality |
| omega 3 PUFA (EPA 1050mg) daily vs Simtuzumab 700mg IV every other week | 0 | Some concerns | Undetected | No concerns | Major concerns | No concerns | No concerns | Moderate quality |
| omega 3 PUFA (EPA 2160mg) daily vs Simtuzumab 700mg IV every other week | 0 | Some concerns | Undetected | No concerns | Major concerns | No concerns | No concerns | Moderate quality |
| Simtuzumab 75mg SQ weekly vs Telmisartan 40mg daily                     | 0 | Some concerns | Undetected | No concerns | Major concerns | No concerns | No concerns | Moderate quality |
| Simtuzumab 75mg SQ weekly vs Vitamin E 800 IU daily                     | 0 | No concerns   | Undetected | No concerns | Major concerns | No concerns | No concerns | High quality     |
| Simtuzumab 75mg SQ weekly vs Volixibat 10mg daily                       | 0 | No concerns   | Undetected | No concerns | Major concerns | No concerns | No concerns | High quality     |
| Simtuzumab 75mg SQ weekly vs Volixibat 20mg daily                       | 0 | No concerns   | Undetected | No concerns | Major concerns | No concerns | No concerns | High quality     |
| Simtuzumab 75mg SQ weekly vs Volixibat 5mg daily                        | 0 | Some concerns | Undetected | No concerns | Major concerns | No concerns | No concerns | Moderate quality |
| omega 3 PUFA (EPA 1050mg) daily vs Simtuzumab 75mg SQ weekly            | 0 | Some concerns | Undetected | No concerns | Major concerns | No concerns | No concerns | Moderate quality |
| omega 3 PUFA (EPA 2160mg) daily vs Simtuzumab 75mg SQ weekly            | 0 | Some concerns | Undetected | No concerns | Major concerns | No concerns | No concerns | Moderate quality |
| Telmisartan 40mg daily vs Vitamin E 800 IU daily                        | 0 | Some concerns | Undetected | No concerns | Major concerns | No concerns | No concerns | Moderate quality |
| Telmisartan 40mg daily vs Volixibat 10mg daily                          | 0 | Some concerns | Undetected | No concerns | Major concerns | No concerns | No concerns | Moderate quality |
| Telmisartan 40mg daily vs Volixibat 20mg daily                          | 0 | Some concerns | Undetected | No concerns | Major concerns | No concerns | No concerns | Moderate quality |
| Telmisartan 40mg daily vs Volixibat 5mg daily                           | 0 | Some concerns | Undetected | No concerns | Major concerns | No concerns | No concerns | Moderate quality |
| omega 3 PUFA (EPA 1050mg) daily vs Telmisartan 40mg daily               | 0 | Some concerns | Undetected | No concerns | Major concerns | No concerns | No concerns | Moderate quality |
| omega 3 PUFA (EPA 2160mg) daily vs Telmisartan 40mg daily               | 0 | Some concerns | Undetected | No concerns | Major concerns | No concerns | No concerns | Moderate quality |
| Vitamin E 800 IU daily vs Volixibat 10mg daily                          | 0 | No concerns   | Undetected | No concerns | Major concerns | No concerns | No concerns | High quality     |
| Vitamin E 800 IU daily vs Volixibat 20mg daily                          | 0 | No concerns   | Undetected | No concerns | Major concerns | No concerns | No concerns | High quality     |
| Vitamin E 800 IU daily vs Volixibat 5mg daily                           | 0 | No concerns   | Undetected | No concerns | Major concerns | No concerns | No concerns | High quality     |
| omega 3 PUFA (EPA 1050mg) daily vs Vitamin E 800 IU daily               | 0 | No concerns   | Undetected | No concerns | Major concerns | No concerns | No concerns | High quality     |
| omega 3 PUFA (EPA 2160mg) daily vs Vitamin E 800 IU daily               | 0 | No concerns   | Undetected | No concerns | Major concerns | No concerns | No concerns | High quality     |
| omega 3 PUFA (EPA 1050mg) daily vs Volixibat 10mg daily                 | 0 | No concerns   | Undetected | No concerns | Major concerns | No concerns | No concerns | High quality     |
| omega 3 PUFA (EPA 2160mg) daily vs Volixibat 10mg daily                 | 0 | No concerns   | Undetected | No concerns | Major concerns | No concerns | No concerns | High quality     |
| omega 3 PUFA (EPA 1050mg) daily vs Volixibat 20mg daily                 | 0 | No concerns   | Undetected | No concerns | Major concerns | No concerns | No concerns | High quality     |
| omega 3 PUFA (EPA 2160mg) daily vs Volixibat 20mg daily                 | 0 | No concerns   | Undetected | No concerns | Major concerns | No concerns | No concerns | High quality     |

|                                                                                        |                          |                          |                       |                     |                    |                      |                    |                          |
|----------------------------------------------------------------------------------------|--------------------------|--------------------------|-----------------------|---------------------|--------------------|----------------------|--------------------|--------------------------|
| omega 3 PUFA (EPA 1050mg) daily vs Volixibat 5mg daily                                 | 0                        | No concerns              | Undetected            | No concerns         | Major concerns     | No concerns          | No concerns        | High quality             |
| omega 3 PUFA (EPA 2160mg) daily vs Volixibat 5mg daily                                 | 0                        | No concerns              | Undetected            | No concerns         | Major concerns     | No concerns          | No concerns        | High quality             |
| omega 3 PUFA (EPA 1050mg) daily vs omega 3 PUFA (EPA 2160mg) daily                     | 0                        | No concerns              | Undetected            | No concerns         | Major concerns     | No concerns          | No concerns        | High quality             |
| <b>Mean change in NAFLD Activity Score [NAS]</b>                                       |                          |                          |                       |                     |                    |                      |                    |                          |
| <b>Comparison</b>                                                                      | <b>Number of studies</b> | <b>Within-study bias</b> | <b>Reporting bias</b> | <b>Indirectness</b> | <b>Imprecision</b> | <b>Heterogeneity</b> | <b>Incoherence</b> | <b>Confidence rating</b> |
| Aldafermin 1mg SQ daily vs Placebo                                                     | 1                        | No concerns              | Undetected            | No concerns         | No concerns        | No concerns          | No concerns        | High quality             |
| Belapectin 2mg/kg IV biweekly vs Belapectin 8mg/kg IV biweekly                         | 1                        | No concerns              | Suspected             | No concerns         | Major concerns     | No concerns          | No concerns        | Low quality              |
| Belapectin 2mg/kg IV biweekly vs Placebo                                               | 1                        | No concerns              | Suspected             | No concerns         | Major concerns     | No concerns          | No concerns        | Low quality              |
| Belapectin 8mg/kg IV biweekly vs Placebo                                               | 1                        | No concerns              | Suspected             | No concerns         | Major concerns     | No concerns          | No concerns        | Low quality              |
| Colesevelam 3.75g daily vs Placebo                                                     | 1                        | No concerns              | Undetected            | No concerns         | Major concerns     | No concerns          | No concerns        | High quality             |
| Liraglutide 1.8mg daily vs Placebo                                                     | 1                        | No concerns              | Suspected             | No concerns         | Major concerns     | No concerns          | No concerns        | Low quality              |
| Metformin 500mg daily vs Placebo                                                       | 1                        | Some concerns            | Suspected             | No concerns         | Major concerns     | No concerns          | No concerns        | Low quality              |
| Obeticholic acid 25mg daily vs Placebo                                                 | 1                        | No concerns              | Undetected            | No concerns         | No concerns        | Major concerns       | No concerns        | High quality             |
| Pentoxifylline 400mg TID vs Placebo                                                    | 3                        | No concerns              | Suspected             | No concerns         | No concerns        | No concerns          | No concerns        | High quality             |
| Pioglitazone 30mg daily vs Placebo                                                     | 1                        | No concerns              | Undetected            | No concerns         | No concerns        | Major concerns       | No concerns        | High quality             |
| Pioglitazone 30mg daily vs Vitamin E 800 IU daily                                      | 1                        | No concerns              | Undetected            | No concerns         | Major concerns     | No concerns          | No concerns        | High quality             |
| Placebo vs Resmetirom 80mg daily                                                       | 1                        | No concerns              | Suspected             | No concerns         | Major concerns     | No concerns          | No concerns        | Low quality              |
| Placebo vs Rosiglitazone 8mg daily                                                     | 1                        | No concerns              | Undetected            | No concerns         | Major concerns     | No concerns          | No concerns        | High quality             |
| Placebo vs Sitagliptin 100mg daily                                                     | 2                        | Some concerns            | Undetected            | No concerns         | No concerns        | Major concerns       | No concerns        | Moderate quality         |
| Placebo vs Telmisartan 40mg daily                                                      | 1                        | Major concerns           | Suspected             | No concerns         | No concerns        | Major concerns       | No concerns        | Very low quality         |
| Placebo vs UDCA 23mg/kg/day                                                            | 1                        | Some concerns            | Suspected             | No concerns         | Major concerns     | No concerns          | No concerns        | Low quality              |
| Placebo vs Vitamin E 800 IU daily                                                      | 1                        | No concerns              | Undetected            | No concerns         | No concerns        | Major concerns       | No concerns        | High quality             |
| omega 3 PUFA (EPA 50.4mg) TID vs Placebo                                               | 1                        | No concerns              | Undetected            | No concerns         | Major concerns     | No concerns          | No concerns        | High quality             |
| Rosiglitazone 8mg and Losartan 50mg daily vs Rosiglitazone 8mg and Metformin 500mg BID | 1                        | Major concerns           | Suspected             | No concerns         | Major concerns     | No concerns          | No concerns        | Very low quality         |
| Rosiglitazone 8mg and Losartan 50mg daily vs Rosiglitazone 8mg daily                   | 1                        | Major concerns           | Suspected             | No concerns         | Major concerns     | No concerns          | No concerns        | Very low quality         |
| Rosiglitazone 8mg and Metformin 500mg BID vs Rosiglitazone 8mg daily                   | 1                        | Major concerns           | Suspected             | No concerns         | Major concerns     | No concerns          | No concerns        | Very low quality         |
| Telmisartan 40mg daily vs Vitamin E 800 IU daily                                       | 1                        | Major concerns           | Undetected            | No concerns         | Major concerns     | No concerns          | No concerns        | Low quality              |
| Aldafermin 1mg SQ daily vs Belapectin 2mg/kg IV biweekly                               | 0                        | No concerns              | Undetected            | No concerns         | No concerns        | Major concerns       | No concerns        | High quality             |
| Aldafermin 1mg SQ daily vs Belapectin 8mg/kg IV biweekly                               | 0                        | No concerns              | Undetected            | No concerns         | No concerns        | Major concerns       | No concerns        | High quality             |

|                                                                            |   |               |            |             |                |                |             |                  |
|----------------------------------------------------------------------------|---|---------------|------------|-------------|----------------|----------------|-------------|------------------|
| Aldafermin 1mg SQ daily vs Colesevelam 3.75g daily                         | 0 | No concerns   | Undetected | No concerns | Major concerns | No concerns    | No concerns | High quality     |
| Aldafermin 1mg SQ daily vs Liraglutide 1.8mg daily                         | 0 | No concerns   | Undetected | No concerns | No concerns    | Major concerns | No concerns | High quality     |
| Aldafermin 1mg SQ daily vs Metformin 500mg daily                           | 0 | Some concerns | Undetected | No concerns | No concerns    | No concerns    | No concerns | High quality     |
| Aldafermin 1mg SQ daily vs Obeticholic acid 25mg daily                     | 0 | No concerns   | Undetected | No concerns | Major concerns | No concerns    | No concerns | High quality     |
| Aldafermin 1mg SQ daily vs Pentoxifylline 400mg TID                        | 0 | No concerns   | Undetected | No concerns | Major concerns | No concerns    | No concerns | High quality     |
| Aldafermin 1mg SQ daily vs Pioglitazone 30mg daily                         | 0 | No concerns   | Undetected | No concerns | Major concerns | No concerns    | No concerns | High quality     |
| Aldafermin 1mg SQ daily vs Resmetirom 80mg daily                           | 0 | No concerns   | Undetected | No concerns | No concerns    | Major concerns | No concerns | High quality     |
| Aldafermin 1mg SQ daily vs Rosiglitazone 8mg and Losartan 50mg daily       | 0 | Some concerns | Undetected | No concerns | Major concerns | No concerns    | No concerns | Moderate quality |
| Aldafermin 1mg SQ daily vs Rosiglitazone 8mg and Metformin 500mg BID       | 0 | Some concerns | Undetected | No concerns | Major concerns | No concerns    | No concerns | Moderate quality |
| Aldafermin 1mg SQ daily vs Rosiglitazone 8mg daily                         | 0 | No concerns   | Undetected | No concerns | Major concerns | No concerns    | No concerns | High quality     |
| Aldafermin 1mg SQ daily vs Sitagliptin 100mg daily                         | 0 | Some concerns | Undetected | No concerns | Major concerns | No concerns    | No concerns | Moderate quality |
| Aldafermin 1mg SQ daily vs Telmisartan 40mg daily                          | 0 | Some concerns | Undetected | No concerns | Major concerns | No concerns    | No concerns | Moderate quality |
| Aldafermin 1mg SQ daily vs UDCA 23mg/kg/day                                | 0 | Some concerns | Undetected | No concerns | No concerns    | Major concerns | No concerns | Moderate quality |
| Aldafermin 1mg SQ daily vs Vitamin E 800 IU daily                          | 0 | No concerns   | Undetected | No concerns | Major concerns | No concerns    | No concerns | High quality     |
| Aldafermin 1mg SQ daily vs omega 3 PUFA (EPA 50.4mg) TID                   | 0 | No concerns   | Undetected | No concerns | No concerns    | Major concerns | No concerns | High quality     |
| Belapectin 2mg/kg IV biweekly vs Colesevelam 3.75g daily                   | 0 | No concerns   | Undetected | No concerns | Major concerns | No concerns    | No concerns | High quality     |
| Belapectin 2mg/kg IV biweekly vs Liraglutide 1.8mg daily                   | 0 | No concerns   | Undetected | No concerns | Major concerns | No concerns    | No concerns | High quality     |
| Belapectin 2mg/kg IV biweekly vs Metformin 500mg daily                     | 0 | No concerns   | Undetected | No concerns | Major concerns | No concerns    | No concerns | High quality     |
| Belapectin 2mg/kg IV biweekly vs Obeticholic acid 25mg daily               | 0 | No concerns   | Undetected | No concerns | Major concerns | No concerns    | No concerns | High quality     |
| Belapectin 2mg/kg IV biweekly vs Pentoxifylline 400mg TID                  | 0 | No concerns   | Undetected | No concerns | No concerns    | Major concerns | No concerns | High quality     |
| Belapectin 2mg/kg IV biweekly vs Pioglitazone 30mg daily                   | 0 | No concerns   | Undetected | No concerns | Major concerns | No concerns    | No concerns | High quality     |
| Belapectin 2mg/kg IV biweekly vs Resmetirom 80mg daily                     | 0 | No concerns   | Undetected | No concerns | Major concerns | No concerns    | No concerns | High quality     |
| Belapectin 2mg/kg IV biweekly vs Rosiglitazone 8mg and Losartan 50mg daily | 0 | Some concerns | Undetected | No concerns | Major concerns | No concerns    | No concerns | Moderate quality |
| Belapectin 2mg/kg IV biweekly vs Rosiglitazone 8mg and Metformin 500mg BID | 0 | Some concerns | Undetected | No concerns | Major concerns | No concerns    | No concerns | Moderate quality |

|                                                                            |   |               |            |             |                |                |             |                  |
|----------------------------------------------------------------------------|---|---------------|------------|-------------|----------------|----------------|-------------|------------------|
| Belapectin 2mg/kg IV biweekly vs Rosiglitazone 8mg daily                   | 0 | No concerns   | Undetected | No concerns | Major concerns | No concerns    | No concerns | High quality     |
| Belapectin 2mg/kg IV biweekly vs Sitagliptin 100mg daily                   | 0 | Some concerns | Undetected | No concerns | Major concerns | No concerns    | No concerns | Moderate quality |
| Belapectin 2mg/kg IV biweekly vs Telmisartan 40mg daily                    | 0 | Some concerns | Undetected | No concerns | No concerns    | Major concerns | No concerns | Moderate quality |
| Belapectin 2mg/kg IV biweekly vs UDCA 23mg/kg/day                          | 0 | No concerns   | Undetected | No concerns | Major concerns | No concerns    | No concerns | High quality     |
| Belapectin 2mg/kg IV biweekly vs Vitamin E 800 IU daily                    | 0 | No concerns   | Undetected | No concerns | Major concerns | No concerns    | No concerns | High quality     |
| Belapectin 2mg/kg IV biweekly vs omega 3 PUFA (EPA 50.4mg) TID             | 0 | No concerns   | Undetected | No concerns | Major concerns | No concerns    | No concerns | High quality     |
| Belapectin 8mg/kg IV biweekly vs Colesevelam 3.75g daily                   | 0 | No concerns   | Undetected | No concerns | Major concerns | No concerns    | No concerns | High quality     |
| Belapectin 8mg/kg IV biweekly vs Liraglutide 1.8mg daily                   | 0 | No concerns   | Undetected | No concerns | Major concerns | No concerns    | No concerns | High quality     |
| Belapectin 8mg/kg IV biweekly vs Metformin 500mg daily                     | 0 | No concerns   | Undetected | No concerns | Major concerns | No concerns    | No concerns | High quality     |
| Belapectin 8mg/kg IV biweekly vs Obeticholic acid 25mg daily               | 0 | No concerns   | Undetected | No concerns | Major concerns | No concerns    | No concerns | High quality     |
| Belapectin 8mg/kg IV biweekly vs Pentoxifylline 400mg TID                  | 0 | No concerns   | Undetected | No concerns | No concerns    | Major concerns | No concerns | High quality     |
| Belapectin 8mg/kg IV biweekly vs Pioglitazone 30mg daily                   | 0 | No concerns   | Undetected | No concerns | Major concerns | No concerns    | No concerns | High quality     |
| Belapectin 8mg/kg IV biweekly vs Resmetirom 80mg daily                     | 0 | No concerns   | Undetected | No concerns | Major concerns | No concerns    | No concerns | High quality     |
| Belapectin 8mg/kg IV biweekly vs Rosiglitazone 8mg and Losartan 50mg daily | 0 | Some concerns | Undetected | No concerns | Major concerns | No concerns    | No concerns | Moderate quality |
| Belapectin 8mg/kg IV biweekly vs Rosiglitazone 8mg and Metformin 500mg BID | 0 | Some concerns | Undetected | No concerns | Major concerns | No concerns    | No concerns | Moderate quality |
| Belapectin 8mg/kg IV biweekly vs Rosiglitazone 8mg daily                   | 0 | No concerns   | Undetected | No concerns | Major concerns | No concerns    | No concerns | High quality     |
| Belapectin 8mg/kg IV biweekly vs Sitagliptin 100mg daily                   | 0 | Some concerns | Undetected | No concerns | Major concerns | No concerns    | No concerns | Moderate quality |
| Belapectin 8mg/kg IV biweekly vs Telmisartan 40mg daily                    | 0 | Some concerns | Undetected | No concerns | No concerns    | Major concerns | No concerns | Moderate quality |
| Belapectin 8mg/kg IV biweekly vs UDCA 23mg/kg/day                          | 0 | No concerns   | Undetected | No concerns | Major concerns | No concerns    | No concerns | High quality     |
| Belapectin 8mg/kg IV biweekly vs Vitamin E 800 IU daily                    | 0 | No concerns   | Undetected | No concerns | Major concerns | No concerns    | No concerns | High quality     |
| Belapectin 8mg/kg IV biweekly vs omega 3 PUFA (EPA 50.4mg) TID             | 0 | No concerns   | Undetected | No concerns | Major concerns | No concerns    | No concerns | High quality     |
| Colesevelam 3.75g daily vs Liraglutide 1.8mg daily                         | 0 | No concerns   | Undetected | No concerns | Major concerns | No concerns    | No concerns | High quality     |
| Colesevelam 3.75g daily vs Metformin 500mg daily                           | 0 | Some concerns | Undetected | No concerns | No concerns    | Major concerns | No concerns | Moderate quality |
| Colesevelam 3.75g daily vs Obeticholic acid 25mg daily                     | 0 | No concerns   | Undetected | No concerns | Major concerns | No concerns    | No concerns | High quality     |
| Colesevelam 3.75g daily vs Pentoxifylline 400mg TID                        | 0 | No concerns   | Undetected | No concerns | Major concerns | No concerns    | No concerns | High quality     |

|                                                                      |   |               |            |             |                |                |             |                  |
|----------------------------------------------------------------------|---|---------------|------------|-------------|----------------|----------------|-------------|------------------|
| Colesevelam 3.75g daily vs Pioglitazone 30mg daily                   | 0 | No concerns   | Undetected | No concerns | Major concerns | No concerns    | No concerns | High quality     |
| Colesevelam 3.75g daily vs Resmetirom 80mg daily                     | 0 | No concerns   | Undetected | No concerns | Major concerns | No concerns    | No concerns | High quality     |
| Colesevelam 3.75g daily vs Rosiglitazone 8mg and Losartan 50mg daily | 0 | Some concerns | Undetected | No concerns | Major concerns | No concerns    | No concerns | Moderate quality |
| Colesevelam 3.75g daily vs Rosiglitazone 8mg and Metformin 500mg BID | 0 | Some concerns | Undetected | No concerns | Major concerns | No concerns    | No concerns | Moderate quality |
| Colesevelam 3.75g daily vs Rosiglitazone 8mg daily                   | 0 | No concerns   | Undetected | No concerns | Major concerns | No concerns    | No concerns | High quality     |
| Colesevelam 3.75g daily vs Sitagliptin 100mg daily                   | 0 | Some concerns | Undetected | No concerns | Major concerns | No concerns    | No concerns | Moderate quality |
| Colesevelam 3.75g daily vs Telmisartan 40mg daily                    | 0 | Some concerns | Undetected | No concerns | Major concerns | No concerns    | No concerns | Moderate quality |
| Colesevelam 3.75g daily vs UDCA 23mg/kg/day                          | 0 | Some concerns | Undetected | No concerns | Major concerns | No concerns    | No concerns | Moderate quality |
| Colesevelam 3.75g daily vs Vitamin E 800 IU daily                    | 0 | No concerns   | Undetected | No concerns | Major concerns | No concerns    | No concerns | High quality     |
| Colesevelam 3.75g daily vs omega 3 PUFA (EPA 50.4mg) TID             | 0 | No concerns   | Undetected | No concerns | Major concerns | No concerns    | No concerns | High quality     |
| Liraglutide 1.8mg daily vs Metformin 500mg daily                     | 0 | Some concerns | Undetected | No concerns | Major concerns | No concerns    | No concerns | Moderate quality |
| Liraglutide 1.8mg daily vs Obeticholic acid 25mg daily               | 0 | No concerns   | Undetected | No concerns | Major concerns | No concerns    | No concerns | High quality     |
| Liraglutide 1.8mg daily vs Pentoxifylline 400mg TID                  | 0 | No concerns   | Undetected | No concerns | Major concerns | No concerns    | No concerns | High quality     |
| Liraglutide 1.8mg daily vs Pioglitazone 30mg daily                   | 0 | No concerns   | Undetected | No concerns | Major concerns | No concerns    | No concerns | High quality     |
| Liraglutide 1.8mg daily vs Resmetirom 80mg daily                     | 0 | No concerns   | Undetected | No concerns | Major concerns | No concerns    | No concerns | High quality     |
| Liraglutide 1.8mg daily vs Rosiglitazone 8mg and Losartan 50mg daily | 0 | Some concerns | Undetected | No concerns | Major concerns | No concerns    | No concerns | Moderate quality |
| Liraglutide 1.8mg daily vs Rosiglitazone 8mg and Metformin 500mg BID | 0 | Some concerns | Undetected | No concerns | Major concerns | No concerns    | No concerns | Moderate quality |
| Liraglutide 1.8mg daily vs Rosiglitazone 8mg daily                   | 0 | No concerns   | Undetected | No concerns | Major concerns | No concerns    | No concerns | High quality     |
| Liraglutide 1.8mg daily vs Sitagliptin 100mg daily                   | 0 | Some concerns | Undetected | No concerns | Major concerns | No concerns    | No concerns | Moderate quality |
| Liraglutide 1.8mg daily vs Telmisartan 40mg daily                    | 0 | Some concerns | Undetected | No concerns | Major concerns | No concerns    | No concerns | Moderate quality |
| Liraglutide 1.8mg daily vs UDCA 23mg/kg/day                          | 0 | Some concerns | Undetected | No concerns | Major concerns | No concerns    | No concerns | Moderate quality |
| Liraglutide 1.8mg daily vs Vitamin E 800 IU daily                    | 0 | No concerns   | Undetected | No concerns | Major concerns | No concerns    | No concerns | High quality     |
| Liraglutide 1.8mg daily vs omega 3 PUFA (EPA 50.4mg) TID             | 0 | No concerns   | Undetected | No concerns | Major concerns | No concerns    | No concerns | High quality     |
| Metformin 500mg daily vs Obeticholic acid 25mg daily                 | 0 | Some concerns | Undetected | No concerns | No concerns    | Major concerns | No concerns | Moderate quality |
| Metformin 500mg daily vs Pentoxifylline 400mg TID                    | 0 | Some concerns | Undetected | No concerns | No concerns    | Major concerns | No concerns | Moderate quality |



|                                                                          |   |               |            |             |                |                |             |                  |
|--------------------------------------------------------------------------|---|---------------|------------|-------------|----------------|----------------|-------------|------------------|
| Metformin 500mg daily vs Pioglitazone 30mg daily                         | 0 | Some concerns | Undetected | No concerns | No concerns    | Major concerns | No concerns | Moderate quality |
| Metformin 500mg daily vs Resmetirom 80mg daily                           | 0 | Some concerns | Undetected | No concerns | No concerns    | Major concerns | No concerns | Moderate quality |
| Metformin 500mg daily vs Rosiglitazone 8mg and Losartan 50mg daily       | 0 | Some concerns | Undetected | No concerns | Major concerns | No concerns    | No concerns | Moderate quality |
| Metformin 500mg daily vs Rosiglitazone 8mg and Metformin 500mg BID       | 0 | Some concerns | Undetected | No concerns | Major concerns | No concerns    | No concerns | Moderate quality |
| Metformin 500mg daily vs Rosiglitazone 8mg daily                         | 0 | Some concerns | Undetected | No concerns | Major concerns | No concerns    | No concerns | Moderate quality |
| Metformin 500mg daily vs Sitagliptin 100mg daily                         | 0 | Some concerns | Undetected | No concerns | No concerns    | Major concerns | No concerns | Moderate quality |
| Metformin 500mg daily vs Telmisartan 40mg daily                          | 0 | Some concerns | Undetected | No concerns | No concerns    | Major concerns | No concerns | Moderate quality |
| Metformin 500mg daily vs UDCA 23mg/kg/day                                | 0 | Some concerns | Undetected | No concerns | Major concerns | No concerns    | No concerns | Moderate quality |
| Metformin 500mg daily vs Vitamin E 800 IU daily                          | 0 | Some concerns | Undetected | No concerns | No concerns    | Major concerns | No concerns | Moderate quality |
| Metformin 500mg daily vs omega 3 PUFA (EPA 50.4mg) TID                   | 0 | Some concerns | Undetected | No concerns | Major concerns | No concerns    | No concerns | Moderate quality |
| Obeticholic acid 25mg daily vs Pentoxifylline 400mg TID                  | 0 | No concerns   | Undetected | No concerns | Major concerns | No concerns    | No concerns | High quality     |
| Obeticholic acid 25mg daily vs Pioglitazone 30mg daily                   | 0 | No concerns   | Undetected | No concerns | Major concerns | No concerns    | No concerns | High quality     |
| Obeticholic acid 25mg daily vs Resmetirom 80mg daily                     | 0 | No concerns   | Undetected | No concerns | Major concerns | No concerns    | No concerns | High quality     |
| Obeticholic acid 25mg daily vs Rosiglitazone 8mg and Losartan 50mg daily | 0 | Some concerns | Undetected | No concerns | Major concerns | No concerns    | No concerns | Moderate quality |
| Obeticholic acid 25mg daily vs Rosiglitazone 8mg and Metformin 500mg BID | 0 | Some concerns | Undetected | No concerns | Major concerns | No concerns    | No concerns | Moderate quality |
| Obeticholic acid 25mg daily vs Rosiglitazone 8mg daily                   | 0 | No concerns   | Undetected | No concerns | Major concerns | No concerns    | No concerns | High quality     |
| Obeticholic acid 25mg daily vs Sitagliptin 100mg daily                   | 0 | Some concerns | Undetected | No concerns | Major concerns | No concerns    | No concerns | Moderate quality |
| Obeticholic acid 25mg daily vs Telmisartan 40mg daily                    | 0 | Some concerns | Undetected | No concerns | Major concerns | No concerns    | No concerns | Moderate quality |
| Obeticholic acid 25mg daily vs UDCA 23mg/kg/day                          | 0 | Some concerns | Undetected | No concerns | Major concerns | No concerns    | No concerns | Moderate quality |
| Obeticholic acid 25mg daily vs Vitamin E 800 IU daily                    | 0 | No concerns   | Undetected | No concerns | Major concerns | No concerns    | No concerns | High quality     |
| Obeticholic acid 25mg daily vs omega 3 PUFA (EPA 50.4mg) TID             | 0 | No concerns   | Undetected | No concerns | Major concerns | No concerns    | No concerns | High quality     |
| Pentoxifylline 400mg TID vs Pioglitazone 30mg daily                      | 0 | No concerns   | Undetected | No concerns | Major concerns | No concerns    | No concerns | High quality     |
| Pentoxifylline 400mg TID vs Resmetirom 80mg daily                        | 0 | No concerns   | Undetected | No concerns | No concerns    | Major concerns | No concerns | High quality     |
| Pentoxifylline 400mg TID vs Rosiglitazone 8mg and Losartan 50mg daily    | 0 | Some concerns | Undetected | No concerns | Major concerns | No concerns    | No concerns | Moderate quality |



|                                                                       |   |               |            |             |                |                |             |                  |
|-----------------------------------------------------------------------|---|---------------|------------|-------------|----------------|----------------|-------------|------------------|
| Pentoxifylline 400mg TID vs Rosiglitazone 8mg and Metformin 500mg BID | 0 | Some concerns | Undetected | No concerns | Major concerns | No concerns    | No concerns | Moderate quality |
| Pentoxifylline 400mg TID vs Rosiglitazone 8mg daily                   | 0 | No concerns   | Undetected | No concerns | Major concerns | No concerns    | No concerns | High quality     |
| Pentoxifylline 400mg TID vs Sitagliptin 100mg daily                   | 0 | Some concerns | Undetected | No concerns | Major concerns | No concerns    | No concerns | Moderate quality |
| Pentoxifylline 400mg TID vs Telmisartan 40mg daily                    | 0 | Some concerns | Undetected | No concerns | Major concerns | No concerns    | No concerns | Moderate quality |
| Pentoxifylline 400mg TID vs UDCA 23mg/kg/day                          | 0 | Some concerns | Undetected | No concerns | No concerns    | Major concerns | No concerns | Moderate quality |
| Pentoxifylline 400mg TID vs Vitamin E 800 IU daily                    | 0 | Some concerns | Undetected | No concerns | Major concerns | No concerns    | No concerns | Moderate quality |
| omega 3 PUFA (EPA 50.4mg) TID vs Pentoxifylline 400mg TID             | 0 | No concerns   | Undetected | No concerns | No concerns    | Major concerns | No concerns | High quality     |
| Pioglitazone 30mg daily vs Resmetirom 80mg daily                      | 0 | No concerns   | Undetected | No concerns | Major concerns | No concerns    | No concerns | High quality     |
| Pioglitazone 30mg daily vs Rosiglitazone 8mg and Losartan 50mg daily  | 0 | Some concerns | Undetected | No concerns | Major concerns | No concerns    | No concerns | Moderate quality |
| Pioglitazone 30mg daily vs Rosiglitazone 8mg and Metformin 500mg BID  | 0 | Some concerns | Undetected | No concerns | Major concerns | No concerns    | No concerns | Moderate quality |
| Pioglitazone 30mg daily vs Rosiglitazone 8mg daily                    | 0 | No concerns   | Undetected | No concerns | Major concerns | No concerns    | No concerns | High quality     |
| Pioglitazone 30mg daily vs Sitagliptin 100mg daily                    | 0 | Some concerns | Undetected | No concerns | Major concerns | No concerns    | No concerns | Moderate quality |
| Pioglitazone 30mg daily vs Telmisartan 40mg daily                     | 0 | Some concerns | Undetected | No concerns | Major concerns | No concerns    | No concerns | Moderate quality |
| Pioglitazone 30mg daily vs UDCA 23mg/kg/day                           | 0 | Some concerns | Undetected | No concerns | Major concerns | No concerns    | No concerns | Moderate quality |
| omega 3 PUFA (EPA 50.4mg) TID vs Pioglitazone 30mg daily              | 0 | No concerns   | Undetected | No concerns | Major concerns | No concerns    | No concerns | High quality     |
| Placebo vs Rosiglitazone 8mg and Losartan 50mg daily                  | 0 | Some concerns | Undetected | No concerns | Major concerns | No concerns    | No concerns | Moderate quality |
| Placebo vs Rosiglitazone 8mg and Metformin 500mg BID                  | 0 | Some concerns | Undetected | No concerns | Major concerns | No concerns    | No concerns | Moderate quality |
| Resmetirom 80mg daily vs Rosiglitazone 8mg and Losartan 50mg daily    | 0 | Some concerns | Undetected | No concerns | Major concerns | No concerns    | No concerns | Moderate quality |
| Resmetirom 80mg daily vs Rosiglitazone 8mg and Metformin 500mg BID    | 0 | Some concerns | Undetected | No concerns | Major concerns | No concerns    | No concerns | Moderate quality |
| Resmetirom 80mg daily vs Rosiglitazone 8mg daily                      | 0 | No concerns   | Undetected | No concerns | Major concerns | No concerns    | No concerns | High quality     |
| Resmetirom 80mg daily vs Sitagliptin 100mg daily                      | 0 | Some concerns | Undetected | No concerns | Major concerns | No concerns    | No concerns | Moderate quality |
| Resmetirom 80mg daily vs Telmisartan 40mg daily                       | 0 | Some concerns | Undetected | No concerns | No concerns    | Major concerns | No concerns | Moderate quality |
| Resmetirom 80mg daily vs UDCA 23mg/kg/day                             | 0 | Some concerns | Undetected | No concerns | Major concerns | No concerns    | No concerns | Moderate quality |
| Resmetirom 80mg daily vs Vitamin E 800 IU daily                       | 0 | No concerns   | Undetected | No concerns | Major concerns | No concerns    | No concerns | High quality     |

|                                                                            |   |               |            |             |                |                |             |                  |
|----------------------------------------------------------------------------|---|---------------|------------|-------------|----------------|----------------|-------------|------------------|
| omega 3 PUFA (EPA 50.4mg) TID vs Resmetirom 80mg daily                     | 0 | No concerns   | Undetected | No concerns | Major concerns | No concerns    | No concerns | High quality     |
| Rosiglitazone 8mg and Losartan 50mg daily vs Sitagliptin 100mg daily       | 0 | Some concerns | Undetected | No concerns | Major concerns | No concerns    | No concerns | Moderate quality |
| Rosiglitazone 8mg and Losartan 50mg daily vs Telmisartan 40mg daily        | 0 | Some concerns | Undetected | No concerns | Major concerns | No concerns    | No concerns | Moderate quality |
| Rosiglitazone 8mg and Losartan 50mg daily vs UDCA 23mg/kg/day              | 0 | Some concerns | Undetected | No concerns | Major concerns | No concerns    | No concerns | Moderate quality |
| Rosiglitazone 8mg and Losartan 50mg daily vs Vitamin E 800 IU daily        | 0 | Some concerns | Undetected | No concerns | Major concerns | No concerns    | No concerns | Moderate quality |
| omega 3 PUFA (EPA 50.4mg) TID vs Rosiglitazone 8mg and Losartan 50mg daily | 0 | Some concerns | Undetected | No concerns | Major concerns | No concerns    | No concerns | Moderate quality |
| Rosiglitazone 8mg and Metformin 500mg BID vs Sitagliptin 100mg daily       | 0 | Some concerns | Undetected | No concerns | Major concerns | No concerns    | No concerns | Moderate quality |
| Rosiglitazone 8mg and Metformin 500mg BID vs Telmisartan 40mg daily        | 0 | Some concerns | Undetected | No concerns | Major concerns | No concerns    | No concerns | Moderate quality |
| Rosiglitazone 8mg and Metformin 500mg BID vs UDCA 23mg/kg/day              | 0 | Some concerns | Undetected | No concerns | Major concerns | No concerns    | No concerns | Moderate quality |
| Rosiglitazone 8mg and Metformin 500mg BID vs Vitamin E 800 IU daily        | 0 | Some concerns | Undetected | No concerns | Major concerns | No concerns    | No concerns | Moderate quality |
| omega 3 PUFA (EPA 50.4mg) TID vs Rosiglitazone 8mg and Metformin 500mg BID | 0 | Some concerns | Undetected | No concerns | Major concerns | No concerns    | No concerns | Moderate quality |
| Rosiglitazone 8mg daily vs Sitagliptin 100mg daily                         | 0 | Some concerns | Undetected | No concerns | Major concerns | No concerns    | No concerns | Moderate quality |
| Rosiglitazone 8mg daily vs Telmisartan 40mg daily                          | 0 | Some concerns | Undetected | No concerns | Major concerns | No concerns    | No concerns | Moderate quality |
| Rosiglitazone 8mg daily vs UDCA 23mg/kg/day                                | 0 | Some concerns | Undetected | No concerns | Major concerns | No concerns    | No concerns | Moderate quality |
| Rosiglitazone 8mg daily vs Vitamin E 800 IU daily                          | 0 | No concerns   | Undetected | No concerns | Major concerns | No concerns    | No concerns | High quality     |
| omega 3 PUFA (EPA 50.4mg) TID vs Rosiglitazone 8mg daily                   | 0 | No concerns   | Undetected | No concerns | Major concerns | No concerns    | No concerns | High quality     |
| Sitagliptin 100mg daily vs Telmisartan 40mg daily                          | 0 | Some concerns | Undetected | No concerns | Major concerns | No concerns    | No concerns | Moderate quality |
| Sitagliptin 100mg daily vs UDCA 23mg/kg/day                                | 0 | Some concerns | Undetected | No concerns | Major concerns | No concerns    | No concerns | Moderate quality |
| Sitagliptin 100mg daily vs Vitamin E 800 IU daily                          | 0 | Some concerns | Undetected | No concerns | Major concerns | No concerns    | No concerns | Moderate quality |
| omega 3 PUFA (EPA 50.4mg) TID vs Sitagliptin 100mg daily                   | 0 | Some concerns | Undetected | No concerns | Major concerns | No concerns    | No concerns | Moderate quality |
| Telmisartan 40mg daily vs UDCA 23mg/kg/day                                 | 0 | Some concerns | Undetected | No concerns | No concerns    | Major concerns | No concerns | Moderate quality |
| omega 3 PUFA (EPA 50.4mg) TID vs Telmisartan 40mg daily                    | 0 | Some concerns | Undetected | No concerns | No concerns    | Major concerns | No concerns | Moderate quality |
| UDCA 23mg/kg/day vs Vitamin E 800 IU daily                                 | 0 | Some concerns | Undetected | No concerns | Major concerns | No concerns    | No concerns | Moderate quality |
| omega 3 PUFA (EPA 50.4mg) TID vs UDCA 23mg/kg/day                          | 0 | Some concerns | Undetected | No concerns | Major concerns | No concerns    | No concerns | Moderate quality |
| omega 3 PUFA (EPA 50.4mg) TID vs Vitamin E 800 IU daily                    | 0 | No concerns   | Undetected | No concerns | Major concerns | No concerns    | No concerns | High quality     |
| <b>Mean change in steatosis score</b>                                      |   |               |            |             |                |                |             |                  |

| Comparison                                                                   | Number of studies | Within-study bias | Reporting bias | Indirectness | Imprecision    | Heterogeneity  | Incoherence | Confidence rating |
|------------------------------------------------------------------------------|-------------------|-------------------|----------------|--------------|----------------|----------------|-------------|-------------------|
| Aldafermin 1mg SQ daily vs Placebo                                           | 1                 | No concerns       | Undetected     | No concerns  | No concerns    | Major concerns | No concerns | High quality      |
| Belapectin 2mg/kg IV biweekly vs Belapectin 8mg/kg IV biweekly               | 1                 | No concerns       | Suspected      | No concerns  | Major concerns | No concerns    | No concerns | Low quality       |
| Belapectin 2mg/kg IV biweekly vs Placebo                                     | 1                 | No concerns       | Suspected      | No concerns  | Major concerns | No concerns    | No concerns | Low quality       |
| Belapectin 8mg/kg IV biweekly vs Placebo                                     | 1                 | No concerns       | Suspected      | No concerns  | Major concerns | No concerns    | No concerns | Low quality       |
| Colesevelam 3.75g daily vs Placebo                                           | 1                 | No concerns       | Undetected     | No concerns  | Major concerns | No concerns    | No concerns | High quality      |
| Liraglutide 1.8mg daily vs Placebo                                           | 1                 | No concerns       | Suspected      | No concerns  | Major concerns | No concerns    | No concerns | Low quality       |
| Metadoxine 500mg BID vs Placebo                                              | 1                 | Some concerns     | Undetected     | No concerns  | Major concerns | No concerns    | No concerns | Moderate quality  |
| Metformin 500mg daily vs Placebo                                             | 1                 | Some concerns     | Suspected      | No concerns  | Major concerns | No concerns    | No concerns | Low quality       |
| Obeticholic acid 25mg daily vs Placebo                                       | 1                 | No concerns       | Undetected     | No concerns  | Major concerns | No concerns    | No concerns | High quality      |
| Pentoxifylline 400mg TID vs Pioglitazone 30mg daily                          | 1                 | No concerns       | Undetected     | No concerns  | Major concerns | No concerns    | No concerns | High quality      |
| Pentoxifylline 400mg TID vs Placebo                                          | 2                 | No concerns       | Suspected      | No concerns  | No concerns    | Major concerns | No concerns | Low quality       |
| Pioglitazone 30mg daily vs Placebo                                           | 1                 | No concerns       | Undetected     | No concerns  | No concerns    | Major concerns | No concerns | High quality      |
| Pioglitazone 30mg daily vs Vitamin E 800 IU daily                            | 1                 | No concerns       | Undetected     | No concerns  | Major concerns | No concerns    | No concerns | High quality      |
| Pioglitazone 45mg daily vs Placebo                                           | 1                 | No concerns       | Undetected     | No concerns  | No concerns    | Major concerns | No concerns | High quality      |
| Placebo vs Sitagliptin 100mg daily                                           | 2                 | Some concerns     | Undetected     | No concerns  | Major concerns | No concerns    | No concerns | Moderate quality  |
| Placebo vs UDCA 23mg/kg day                                                  | 1                 | Some concerns     | Suspected      | No concerns  | Major concerns | No concerns    | No concerns | Low quality       |
| Placebo vs Vitamin E 800 IU daily                                            | 2                 | No concerns       | Undetected     | No concerns  | No concerns    | Major concerns | No concerns | High quality      |
| Placebo vs Vitamin E 800 IU daily and Pioglitazone 45mg daily                | 1                 | No concerns       | Undetected     | No concerns  | No concerns    | Major concerns | No concerns | High quality      |
| Placebo vs Volixibat 10mg daily                                              | 1                 | No concerns       | Undetected     | No concerns  | Major concerns | No concerns    | No concerns | High quality      |
| Placebo vs Volixibat 20mg daily                                              | 1                 | No concerns       | Undetected     | No concerns  | Major concerns | No concerns    | No concerns | High quality      |
| Placebo vs Volixibat 5mg daily                                               | 1                 | No concerns       | Undetected     | No concerns  | Major concerns | No concerns    | No concerns | High quality      |
| omega 3 PUFA (EPA 50.4mg) TID vs Placebo                                     | 1                 | No concerns       | Suspected      | No concerns  | Major concerns | No concerns    | No concerns | Low quality       |
| Telmisartan 40mg daily vs Vitamin E 800 IU daily                             | 1                 | Major concerns    | Undetected     | No concerns  | Major concerns | No concerns    | No concerns | Low quality       |
| Vitamin E 800 IU daily vs Vitamin E 800 IU daily and Pioglitazone 45mg daily | 1                 | No concerns       | Undetected     | No concerns  | Major concerns | No concerns    | No concerns | High quality      |
| Volixibat 10mg daily vs Volixibat 20mg daily                                 | 1                 | No concerns       | Undetected     | No concerns  | Major concerns | No concerns    | No concerns | High quality      |
| Volixibat 10mg daily vs Volixibat 5mg daily                                  | 1                 | No concerns       | Undetected     | No concerns  | Major concerns | No concerns    | No concerns | High quality      |
| Volixibat 20mg daily vs Volixibat 5mg daily                                  | 1                 | No concerns       | Undetected     | No concerns  | Major concerns | No concerns    | No concerns | High quality      |
| Aldafermin 1mg SQ daily vs Belapectin 2mg/kg IV biweekly                     | 0                 | No concerns       | Undetected     | No concerns  | Major concerns | No concerns    | No concerns | High quality      |
| Aldafermin 1mg SQ daily vs Belapectin 8mg/kg IV biweekly                     | 0                 | No concerns       | Undetected     | No concerns  | Major concerns | No concerns    | No concerns | High quality      |

|                                                                               |   |               |            |             |                |                |             |                  |
|-------------------------------------------------------------------------------|---|---------------|------------|-------------|----------------|----------------|-------------|------------------|
| Aldafermin 1mg SQ daily vs Colesevelam 3.75g daily                            | 0 | No concerns   | Undetected | No concerns | No concerns    | Major concerns | No concerns | High quality     |
| Aldafermin 1mg SQ daily vs Liraglutide 1.8mg daily                            | 0 | No concerns   | Undetected | No concerns | Major concerns | No concerns    | No concerns | High quality     |
| Aldafermin 1mg SQ daily vs Metadoxine 500mg BID                               | 0 | Some concerns | Undetected | No concerns | Major concerns | No concerns    | No concerns | Moderate quality |
| Aldafermin 1mg SQ daily vs Metformin 500mg daily                              | 0 | Some concerns | Undetected | No concerns | No concerns    | Major concerns | No concerns | Moderate quality |
| Aldafermin 1mg SQ daily vs Obeticholic acid 25mg daily                        | 0 | No concerns   | Undetected | No concerns | Major concerns | No concerns    | No concerns | High quality     |
| Aldafermin 1mg SQ daily vs Pentoxifylline 400mg TID                           | 0 | No concerns   | Undetected | No concerns | Major concerns | No concerns    | No concerns | High quality     |
| Aldafermin 1mg SQ daily vs Pioglitazone 30mg daily                            | 0 | No concerns   | Undetected | No concerns | Major concerns | No concerns    | No concerns | High quality     |
| Aldafermin 1mg SQ daily vs Pioglitazone 45mg daily                            | 0 | No concerns   | Undetected | No concerns | Major concerns | No concerns    | No concerns | High quality     |
| Aldafermin 1mg SQ daily vs Sitagliptin 100mg daily                            | 0 | Some concerns | Undetected | No concerns | Major concerns | No concerns    | No concerns | Moderate quality |
| Aldafermin 1mg SQ daily vs Telmisartan 40mg daily                             | 0 | Some concerns | Undetected | No concerns | Major concerns | No concerns    | No concerns | Moderate quality |
| Aldafermin 1mg SQ daily vs UDCA 23mg/kg day                                   | 0 | Some concerns | Undetected | No concerns | No concerns    | Major concerns | No concerns | Moderate quality |
| Aldafermin 1mg SQ daily vs Vitamin E 800 IU daily                             | 0 | No concerns   | Undetected | No concerns | Major concerns | No concerns    | No concerns | High quality     |
| Aldafermin 1mg SQ daily vs Vitamin E 800 IU daily and Pioglitazone 45mg daily | 0 | No concerns   | Undetected | No concerns | Major concerns | No concerns    | No concerns | High quality     |
| Aldafermin 1mg SQ daily vs Volixibat 10mg daily                               | 0 | No concerns   | Undetected | No concerns | No concerns    | Major concerns | No concerns | High quality     |
| Aldafermin 1mg SQ daily vs Volixibat 20mg daily                               | 0 | No concerns   | Undetected | No concerns | Major concerns | No concerns    | No concerns | High quality     |
| Aldafermin 1mg SQ daily vs Volixibat 5mg daily                                | 0 | No concerns   | Undetected | No concerns | Major concerns | No concerns    | No concerns | High quality     |
| Aldafermin 1mg SQ daily vs omega 3 PUFA (EPA 50.4mg) TID                      | 0 | No concerns   | Undetected | No concerns | Major concerns | No concerns    | No concerns | High quality     |
| Belapectin 2mg/kg IV biweekly vs Colesevelam 3.75g daily                      | 0 | No concerns   | Undetected | No concerns | Major concerns | No concerns    | No concerns | High quality     |
| Belapectin 2mg/kg IV biweekly vs Liraglutide 1.8mg daily                      | 0 | No concerns   | Undetected | No concerns | Major concerns | No concerns    | No concerns | High quality     |
| Belapectin 2mg/kg IV biweekly vs Metadoxine 500mg BID                         | 0 | No concerns   | Undetected | No concerns | Major concerns | No concerns    | No concerns | High quality     |
| Belapectin 2mg/kg IV biweekly vs Metformin 500mg daily                        | 0 | No concerns   | Undetected | No concerns | Major concerns | No concerns    | No concerns | High quality     |
| Belapectin 2mg/kg IV biweekly vs Obeticholic acid 25mg daily                  | 0 | No concerns   | Undetected | No concerns | Major concerns | No concerns    | No concerns | High quality     |
| Belapectin 2mg/kg IV biweekly vs Pentoxifylline 400mg TID                     | 0 | No concerns   | Undetected | No concerns | Major concerns | No concerns    | No concerns | High quality     |
| Belapectin 2mg/kg IV biweekly vs Pioglitazone 30mg daily                      | 0 | No concerns   | Undetected | No concerns | Major concerns | No concerns    | No concerns | High quality     |
| Belapectin 2mg/kg IV biweekly vs Pioglitazone 45mg daily                      | 0 | No concerns   | Undetected | No concerns | Major concerns | No concerns    | No concerns | High quality     |
| Belapectin 2mg/kg IV biweekly vs Sitagliptin 100mg daily                      | 0 | Some concerns | Undetected | No concerns | Major concerns | No concerns    | No concerns | Moderate quality |

|                                                                                     |   |               |            |             |                |             |             |                  |
|-------------------------------------------------------------------------------------|---|---------------|------------|-------------|----------------|-------------|-------------|------------------|
| Belapectin 2mg/kg IV biweekly vs Telmisartan 40mg daily                             | 0 | Some concerns | Undetected | No concerns | Major concerns | No concerns | No concerns | Moderate quality |
| Belapectin 2mg/kg IV biweekly vs UDCA 23mg/kg day                                   | 0 | No concerns   | Undetected | No concerns | Major concerns | No concerns | No concerns | High quality     |
| Belapectin 2mg/kg IV biweekly vs Vitamin E 800 IU daily                             | 0 | No concerns   | Undetected | No concerns | Major concerns | No concerns | No concerns | High quality     |
| Belapectin 2mg/kg IV biweekly vs Vitamin E 800 IU daily and Pioglitazone 45mg daily | 0 | No concerns   | Undetected | No concerns | Major concerns | No concerns | No concerns | High quality     |
| Belapectin 2mg/kg IV biweekly vs Volixibat 10mg daily                               | 0 | No concerns   | Undetected | No concerns | Major concerns | No concerns | No concerns | High quality     |
| Belapectin 2mg/kg IV biweekly vs Volixibat 20mg daily                               | 0 | No concerns   | Undetected | No concerns | Major concerns | No concerns | No concerns | High quality     |
| Belapectin 2mg/kg IV biweekly vs Volixibat 5mg daily                                | 0 | No concerns   | Undetected | No concerns | Major concerns | No concerns | No concerns | High quality     |
| Belapectin 2mg/kg IV biweekly vs omega 3 PUFA (EPA 50.4mg) TID                      | 0 | No concerns   | Undetected | No concerns | Major concerns | No concerns | No concerns | High quality     |
| Belapectin 8mg/kg IV biweekly vs Colesevelam 3.75g daily                            | 0 | No concerns   | Undetected | No concerns | Major concerns | No concerns | No concerns | High quality     |
| Belapectin 8mg/kg IV biweekly vs Liraglutide 1.8mg daily                            | 0 | No concerns   | Undetected | No concerns | Major concerns | No concerns | No concerns | High quality     |
| Belapectin 8mg/kg IV biweekly vs Metadoxine 500mg BID                               | 0 | No concerns   | Undetected | No concerns | Major concerns | No concerns | No concerns | High quality     |
| Belapectin 8mg/kg IV biweekly vs Metformin 500mg daily                              | 0 | No concerns   | Undetected | No concerns | Major concerns | No concerns | No concerns | High quality     |
| Belapectin 8mg/kg IV biweekly vs Obeticholic acid 25mg daily                        | 0 | No concerns   | Undetected | No concerns | Major concerns | No concerns | No concerns | High quality     |
| Belapectin 8mg/kg IV biweekly vs Pentoxifylline 400mg TID                           | 0 | No concerns   | Undetected | No concerns | Major concerns | No concerns | No concerns | High quality     |
| Belapectin 8mg/kg IV biweekly vs Pioglitazone 30mg daily                            | 0 | No concerns   | Undetected | No concerns | Major concerns | No concerns | No concerns | High quality     |
| Belapectin 8mg/kg IV biweekly vs Pioglitazone 45mg daily                            | 0 | No concerns   | Undetected | No concerns | Major concerns | No concerns | No concerns | High quality     |
| Belapectin 8mg/kg IV biweekly vs Sitagliptin 100mg daily                            | 0 | Some concerns | Undetected | No concerns | Major concerns | No concerns | No concerns | Moderate quality |
| Belapectin 8mg/kg IV biweekly vs Telmisartan 40mg daily                             | 0 | Some concerns | Undetected | No concerns | Major concerns | No concerns | No concerns | Moderate quality |
| Belapectin 8mg/kg IV biweekly vs UDCA 23mg/kg day                                   | 0 | No concerns   | Undetected | No concerns | Major concerns | No concerns | No concerns | High quality     |
| Belapectin 8mg/kg IV biweekly vs Vitamin E 800 IU daily                             | 0 | No concerns   | Undetected | No concerns | Major concerns | No concerns | No concerns | High quality     |
| Belapectin 8mg/kg IV biweekly vs Vitamin E 800 IU daily and Pioglitazone 45mg daily | 0 | No concerns   | Undetected | No concerns | Major concerns | No concerns | No concerns | High quality     |
| Belapectin 8mg/kg IV biweekly vs Volixibat 10mg daily                               | 0 | No concerns   | Undetected | No concerns | Major concerns | No concerns | No concerns | High quality     |
| Belapectin 8mg/kg IV biweekly vs Volixibat 20mg daily                               | 0 | No concerns   | Undetected | No concerns | Major concerns | No concerns | No concerns | High quality     |
| Belapectin 8mg/kg IV biweekly vs Volixibat 5mg daily                                | 0 | No concerns   | Undetected | No concerns | Major concerns | No concerns | No concerns | High quality     |
| Belapectin 8mg/kg IV biweekly vs omega 3 PUFA (EPA 50.4mg) TID                      | 0 | No concerns   | Undetected | No concerns | Major concerns | No concerns | No concerns | High quality     |

|                                                                               |   |               |            |             |                |                |             |                  |
|-------------------------------------------------------------------------------|---|---------------|------------|-------------|----------------|----------------|-------------|------------------|
| Colesevelam 3.75g daily vs Liraglutide 1.8mg daily                            | 0 | No concerns   | Undetected | No concerns | Major concerns | No concerns    | No concerns | High quality     |
| Colesevelam 3.75g daily vs Metadoxine 500mg BID                               | 0 | Some concerns | Undetected | No concerns | Major concerns | No concerns    | No concerns | Moderate quality |
| Colesevelam 3.75g daily vs Metformin 500mg daily                              | 0 | Some concerns | Undetected | No concerns | Major concerns | No concerns    | No concerns | Moderate quality |
| Colesevelam 3.75g daily vs Obeticholic acid 25mg daily                        | 0 | No concerns   | Undetected | No concerns | Major concerns | No concerns    | No concerns | High quality     |
| Colesevelam 3.75g daily vs Pentoxifylline 400mg TID                           | 0 | No concerns   | Undetected | No concerns | Major concerns | No concerns    | No concerns | High quality     |
| Colesevelam 3.75g daily vs Pioglitazone 30mg daily                            | 0 | No concerns   | Undetected | No concerns | Major concerns | No concerns    | No concerns | High quality     |
| Colesevelam 3.75g daily vs Pioglitazone 45mg daily                            | 0 | No concerns   | Undetected | No concerns | Major concerns | No concerns    | No concerns | High quality     |
| Colesevelam 3.75g daily vs Sitagliptin 100mg daily                            | 0 | Some concerns | Undetected | No concerns | Major concerns | No concerns    | No concerns | Moderate quality |
| Colesevelam 3.75g daily vs Telmisartan 40mg daily                             | 0 | Some concerns | Undetected | No concerns | No concerns    | Major concerns | No concerns | Moderate quality |
| Colesevelam 3.75g daily vs UDCA 23mg/kg day                                   | 0 | Some concerns | Undetected | No concerns | Major concerns | No concerns    | No concerns | Moderate quality |
| Colesevelam 3.75g daily vs Vitamin E 800 IU daily                             | 0 | No concerns   | Undetected | No concerns | Major concerns | No concerns    | No concerns | High quality     |
| Colesevelam 3.75g daily vs Vitamin E 800 IU daily and Pioglitazone 45mg daily | 0 | No concerns   | Undetected | No concerns | Major concerns | No concerns    | No concerns | High quality     |
| Colesevelam 3.75g daily vs Volixibat 10mg daily                               | 0 | No concerns   | Undetected | No concerns | Major concerns | No concerns    | No concerns | High quality     |
| Colesevelam 3.75g daily vs Volixibat 20mg daily                               | 0 | No concerns   | Undetected | No concerns | Major concerns | No concerns    | No concerns | High quality     |
| Colesevelam 3.75g daily vs Volixibat 5mg daily                                | 0 | No concerns   | Undetected | No concerns | Major concerns | No concerns    | No concerns | High quality     |
| Colesevelam 3.75g daily vs omega 3 PUFA (EPA 50.4mg) TID                      | 0 | No concerns   | Undetected | No concerns | Major concerns | No concerns    | No concerns | High quality     |
| Liraglutide 1.8mg daily vs Metadoxine 500mg BID                               | 0 | Some concerns | Undetected | No concerns | Major concerns | No concerns    | No concerns | Moderate quality |
| Liraglutide 1.8mg daily vs Metformin 500mg daily                              | 0 | Some concerns | Undetected | No concerns | Major concerns | No concerns    | No concerns | Moderate quality |
| Liraglutide 1.8mg daily vs Obeticholic acid 25mg daily                        | 0 | No concerns   | Undetected | No concerns | Major concerns | No concerns    | No concerns | High quality     |
| Liraglutide 1.8mg daily vs Pentoxifylline 400mg TID                           | 0 | No concerns   | Undetected | No concerns | Major concerns | No concerns    | No concerns | High quality     |
| Liraglutide 1.8mg daily vs Pioglitazone 30mg daily                            | 0 | No concerns   | Undetected | No concerns | Major concerns | No concerns    | No concerns | High quality     |
| Liraglutide 1.8mg daily vs Pioglitazone 45mg daily                            | 0 | No concerns   | Undetected | No concerns | Major concerns | No concerns    | No concerns | High quality     |
| Liraglutide 1.8mg daily vs Sitagliptin 100mg daily                            | 0 | Some concerns | Undetected | No concerns | Major concerns | No concerns    | No concerns | Moderate quality |
| Liraglutide 1.8mg daily vs Telmisartan 40mg daily                             | 0 | Some concerns | Undetected | No concerns | Major concerns | No concerns    | No concerns | Moderate quality |
| Liraglutide 1.8mg daily vs UDCA 23mg/kg day                                   | 0 | Some concerns | Undetected | No concerns | Major concerns | No concerns    | No concerns | Moderate quality |
| Liraglutide 1.8mg daily vs Vitamin E 800 IU daily                             | 0 | No concerns   | Undetected | No concerns | Major concerns | No concerns    | No concerns | High quality     |



|                                                                               |   |               |            |             |                |                |             |                  |
|-------------------------------------------------------------------------------|---|---------------|------------|-------------|----------------|----------------|-------------|------------------|
| Liraglutide 1.8mg daily vs Vitamin E 800 IU daily and Pioglitazone 45mg daily | 0 | No concerns   | Undetected | No concerns | Major concerns | No concerns    | No concerns | High quality     |
| Liraglutide 1.8mg daily vs Volixibat 10mg daily                               | 0 | No concerns   | Undetected | No concerns | Major concerns | No concerns    | No concerns | High quality     |
| Liraglutide 1.8mg daily vs Volixibat 20mg daily                               | 0 | No concerns   | Undetected | No concerns | Major concerns | No concerns    | No concerns | High quality     |
| Liraglutide 1.8mg daily vs Volixibat 5mg daily                                | 0 | No concerns   | Undetected | No concerns | Major concerns | No concerns    | No concerns | High quality     |
| Liraglutide 1.8mg daily vs omega 3 PUFA (EPA 50.4mg) TID                      | 0 | No concerns   | Undetected | No concerns | Major concerns | No concerns    | No concerns | High quality     |
| Metadoxine 500mg BID vs Metformin 500mg daily                                 | 0 | Some concerns | Undetected | No concerns | Major concerns | No concerns    | No concerns | Moderate quality |
| Metadoxine 500mg BID vs Obeticholic acid 25mg daily                           | 0 | Some concerns | Undetected | No concerns | Major concerns | No concerns    | No concerns | Moderate quality |
| Metadoxine 500mg BID vs Pentoxifylline 400mg TID                              | 0 | Some concerns | Undetected | No concerns | Major concerns | No concerns    | No concerns | Moderate quality |
| Metadoxine 500mg BID vs Pioglitazone 30mg daily                               | 0 | No concerns   | Undetected | No concerns | Major concerns | No concerns    | No concerns | High quality     |
| Metadoxine 500mg BID vs Pioglitazone 45mg daily                               | 0 | Some concerns | Undetected | No concerns | Major concerns | No concerns    | No concerns | Moderate quality |
| Metadoxine 500mg BID vs Sitagliptin 100mg daily                               | 0 | Some concerns | Undetected | No concerns | Major concerns | No concerns    | No concerns | Moderate quality |
| Metadoxine 500mg BID vs Telmisartan 40mg daily                                | 0 | Some concerns | Undetected | No concerns | Major concerns | No concerns    | No concerns | Moderate quality |
| Metadoxine 500mg BID vs UDCA 23mg/kg day                                      | 0 | Some concerns | Undetected | No concerns | Major concerns | No concerns    | No concerns | Moderate quality |
| Metadoxine 500mg BID vs Vitamin E 800 IU daily                                | 0 | No concerns   | Undetected | No concerns | Major concerns | No concerns    | No concerns | High quality     |
| Metadoxine 500mg BID vs Vitamin E 800 IU daily and Pioglitazone 45mg daily    | 0 | No concerns   | Undetected | No concerns | Major concerns | No concerns    | No concerns | High quality     |
| Metadoxine 500mg BID vs Volixibat 10mg daily                                  | 0 | No concerns   | Undetected | No concerns | Major concerns | No concerns    | No concerns | High quality     |
| Metadoxine 500mg BID vs Volixibat 20mg daily                                  | 0 | No concerns   | Undetected | No concerns | Major concerns | No concerns    | No concerns | High quality     |
| Metadoxine 500mg BID vs Volixibat 5mg daily                                   | 0 | No concerns   | Undetected | No concerns | Major concerns | No concerns    | No concerns | High quality     |
| Metadoxine 500mg BID vs omega 3 PUFA (EPA 50.4mg) TID                         | 0 | Some concerns | Undetected | No concerns | Major concerns | No concerns    | No concerns | Moderate quality |
| Metformin 500mg daily vs Obeticholic acid 25mg daily                          | 0 | Some concerns | Undetected | No concerns | Major concerns | No concerns    | No concerns | Moderate quality |
| Metformin 500mg daily vs Pentoxifylline 400mg TID                             | 0 | Some concerns | Undetected | No concerns | Major concerns | No concerns    | No concerns | Moderate quality |
| Metformin 500mg daily vs Pioglitazone 30mg daily                              | 0 | No concerns   | Undetected | No concerns | No concerns    | Major concerns | No concerns | High quality     |
| Metformin 500mg daily vs Pioglitazone 45mg daily                              | 0 | Some concerns | Undetected | No concerns | No concerns    | Major concerns | No concerns | Moderate quality |
| Metformin 500mg daily vs Sitagliptin 100mg daily                              | 0 | Some concerns | Undetected | No concerns | Major concerns | No concerns    | No concerns | Moderate quality |
| Metformin 500mg daily vs Telmisartan 40mg daily                               | 0 | Some concerns | Undetected | No concerns | No concerns    | Major concerns | No concerns | Moderate quality |

|                                                                                   |   |               |            |             |                |                |             |                  |
|-----------------------------------------------------------------------------------|---|---------------|------------|-------------|----------------|----------------|-------------|------------------|
| Metformin 500mg daily vs UDCA 23mg/kg day                                         | 0 | Some concerns | Undetected | No concerns | Major concerns | No concerns    | No concerns | Moderate quality |
| Metformin 500mg daily vs Vitamin E 800 IU daily                                   | 0 | No concerns   | Undetected | No concerns | No concerns    | Major concerns | No concerns | High quality     |
| Metformin 500mg daily vs Vitamin E 800 IU daily and Pioglitazone 45mg daily       | 0 | No concerns   | Undetected | No concerns | No concerns    | Major concerns | No concerns | High quality     |
| Metformin 500mg daily vs Volixibat 10mg daily                                     | 0 | No concerns   | Undetected | No concerns | Major concerns | No concerns    | No concerns | High quality     |
| Metformin 500mg daily vs Volixibat 20mg daily                                     | 0 | No concerns   | Undetected | No concerns | Major concerns | No concerns    | No concerns | High quality     |
| Metformin 500mg daily vs Volixibat 5mg daily                                      | 0 | No concerns   | Undetected | No concerns | Major concerns | No concerns    | No concerns | High quality     |
| Metformin 500mg daily vs omega 3 PUFA (EPA 50.4mg) TID                            | 0 | Some concerns | Undetected | No concerns | Major concerns | No concerns    | No concerns | Moderate quality |
| Obeticholic acid 25mg daily vs Pentoxifylline 400mg TID                           | 0 | No concerns   | Undetected | No concerns | Major concerns | No concerns    | No concerns | High quality     |
| Obeticholic acid 25mg daily vs Pioglitazone 30mg daily                            | 0 | No concerns   | Undetected | No concerns | Major concerns | No concerns    | No concerns | High quality     |
| Obeticholic acid 25mg daily vs Pioglitazone 45mg daily                            | 0 | No concerns   | Undetected | No concerns | Major concerns | No concerns    | No concerns | High quality     |
| Obeticholic acid 25mg daily vs Sitagliptin 100mg daily                            | 0 | Some concerns | Undetected | No concerns | Major concerns | No concerns    | No concerns | Moderate quality |
| Obeticholic acid 25mg daily vs Telmisartan 40mg daily                             | 0 | Some concerns | Undetected | No concerns | Major concerns | No concerns    | No concerns | Moderate quality |
| Obeticholic acid 25mg daily vs UDCA 23mg/kg day                                   | 0 | Some concerns | Undetected | No concerns | Major concerns | No concerns    | No concerns | Moderate quality |
| Obeticholic acid 25mg daily vs Vitamin E 800 IU daily                             | 0 | No concerns   | Undetected | No concerns | Major concerns | No concerns    | No concerns | High quality     |
| Obeticholic acid 25mg daily vs Vitamin E 800 IU daily and Pioglitazone 45mg daily | 0 | No concerns   | Undetected | No concerns | Major concerns | No concerns    | No concerns | High quality     |
| Obeticholic acid 25mg daily vs Volixibat 10mg daily                               | 0 | No concerns   | Undetected | No concerns | Major concerns | No concerns    | No concerns | High quality     |
| Obeticholic acid 25mg daily vs Volixibat 20mg daily                               | 0 | No concerns   | Undetected | No concerns | Major concerns | No concerns    | No concerns | High quality     |
| Obeticholic acid 25mg daily vs Volixibat 5mg daily                                | 0 | No concerns   | Undetected | No concerns | Major concerns | No concerns    | No concerns | High quality     |
| Obeticholic acid 25mg daily vs omega 3 PUFA (EPA 50.4mg) TID                      | 0 | No concerns   | Undetected | No concerns | Major concerns | No concerns    | No concerns | High quality     |
| Pentoxifylline 400mg TID vs Pioglitazone 45mg daily                               | 0 | No concerns   | Undetected | No concerns | Major concerns | No concerns    | No concerns | High quality     |
| Pentoxifylline 400mg TID vs Sitagliptin 100mg daily                               | 0 | Some concerns | Undetected | No concerns | Major concerns | No concerns    | No concerns | Moderate quality |
| Pentoxifylline 400mg TID vs Telmisartan 40mg daily                                | 0 | Some concerns | Undetected | No concerns | Major concerns | No concerns    | No concerns | Moderate quality |
| Pentoxifylline 400mg TID vs UDCA 23mg/kg day                                      | 0 | Some concerns | Undetected | No concerns | Major concerns | No concerns    | No concerns | Moderate quality |
| Pentoxifylline 400mg TID vs Vitamin E 800 IU daily                                | 0 | No concerns   | Undetected | No concerns | Major concerns | No concerns    | No concerns | High quality     |
| Pentoxifylline 400mg TID vs Vitamin E 800 IU daily and Pioglitazone 45mg daily    | 0 | No concerns   | Undetected | No concerns | Major concerns | No concerns    | No concerns | High quality     |



|                                                                               |   |               |            |             |                |                |             |                  |
|-------------------------------------------------------------------------------|---|---------------|------------|-------------|----------------|----------------|-------------|------------------|
| Pentoxifylline 400mg TID vs Volixibat 10mg daily                              | 0 | No concerns   | Undetected | No concerns | Major concerns | No concerns    | No concerns | High quality     |
| Pentoxifylline 400mg TID vs Volixibat 20mg daily                              | 0 | No concerns   | Undetected | No concerns | Major concerns | No concerns    | No concerns | High quality     |
| Pentoxifylline 400mg TID vs Volixibat 5mg daily                               | 0 | No concerns   | Undetected | No concerns | Major concerns | No concerns    | No concerns | High quality     |
| omega 3 PUFA (EPA 50.4mg) TID vs Pentoxifylline 400mg TID                     | 0 | No concerns   | Undetected | No concerns | Major concerns | No concerns    | No concerns | High quality     |
| Pioglitazone 30mg daily vs Pioglitazone 45mg daily                            | 0 | No concerns   | Undetected | No concerns | Major concerns | No concerns    | No concerns | High quality     |
| Pioglitazone 30mg daily vs Sitagliptin 100mg daily                            | 0 | Some concerns | Undetected | No concerns | Major concerns | No concerns    | No concerns | Moderate quality |
| Pioglitazone 30mg daily vs Telmisartan 40mg daily                             | 0 | Some concerns | Undetected | No concerns | Major concerns | No concerns    | No concerns | Moderate quality |
| Pioglitazone 30mg daily vs UDCA 23mg/kg day                                   | 0 | No concerns   | Undetected | No concerns | No concerns    | Major concerns | No concerns | High quality     |
| Pioglitazone 30mg daily vs Vitamin E 800 IU daily and Pioglitazone 45mg daily | 0 | No concerns   | Undetected | No concerns | Major concerns | No concerns    | No concerns | High quality     |
| Pioglitazone 30mg daily vs Volixibat 10mg daily                               | 0 | No concerns   | Undetected | No concerns | Major concerns | No concerns    | No concerns | High quality     |
| Pioglitazone 30mg daily vs Volixibat 20mg daily                               | 0 | No concerns   | Undetected | No concerns | Major concerns | No concerns    | No concerns | High quality     |
| Pioglitazone 30mg daily vs Volixibat 5mg daily                                | 0 | No concerns   | Undetected | No concerns | Major concerns | No concerns    | No concerns | High quality     |
| omega 3 PUFA (EPA 50.4mg) TID vs Pioglitazone 30mg daily                      | 0 | No concerns   | Undetected | No concerns | Major concerns | No concerns    | No concerns | High quality     |
| Pioglitazone 45mg daily vs Sitagliptin 100mg daily                            | 0 | Some concerns | Undetected | No concerns | Major concerns | No concerns    | No concerns | Moderate quality |
| Pioglitazone 45mg daily vs Telmisartan 40mg daily                             | 0 | Some concerns | Undetected | No concerns | Major concerns | No concerns    | No concerns | Moderate quality |
| Pioglitazone 45mg daily vs UDCA 23mg/kg day                                   | 0 | Some concerns | Undetected | No concerns | No concerns    | Major concerns | No concerns | Moderate quality |
| Pioglitazone 45mg daily vs Vitamin E 800 IU daily                             | 0 | No concerns   | Undetected | No concerns | Major concerns | No concerns    | No concerns | High quality     |
| Pioglitazone 45mg daily vs Vitamin E 800 IU daily and Pioglitazone 45mg daily | 0 | No concerns   | Undetected | No concerns | Major concerns | No concerns    | No concerns | High quality     |
| Pioglitazone 45mg daily vs Volixibat 10mg daily                               | 0 | No concerns   | Undetected | No concerns | No concerns    | Major concerns | No concerns | High quality     |
| Pioglitazone 45mg daily vs Volixibat 20mg daily                               | 0 | No concerns   | Undetected | No concerns | Major concerns | No concerns    | No concerns | High quality     |
| Pioglitazone 45mg daily vs Volixibat 5mg daily                                | 0 | No concerns   | Undetected | No concerns | Major concerns | No concerns    | No concerns | High quality     |
| omega 3 PUFA (EPA 50.4mg) TID vs Pioglitazone 45mg daily                      | 0 | No concerns   | Undetected | No concerns | Major concerns | No concerns    | No concerns | High quality     |
| Placebo vs Telmisartan 40mg daily                                             | 0 | Some concerns | Undetected | No concerns | No concerns    | Major concerns | No concerns | Moderate quality |
| Sitagliptin 100mg daily vs Telmisartan 40mg daily                             | 0 | Some concerns | Undetected | No concerns | Major concerns | No concerns    | No concerns | Moderate quality |
| Sitagliptin 100mg daily vs UDCA 23mg/kg day                                   | 0 | Some concerns | Undetected | No concerns | Major concerns | No concerns    | No concerns | Moderate quality |
| Sitagliptin 100mg daily vs Vitamin E 800 IU daily                             | 0 | Some concerns | Undetected | No concerns | Major concerns | No concerns    | No concerns | Moderate quality |

|                                                                                     |   |               |            |             |                |                |             |                  |
|-------------------------------------------------------------------------------------|---|---------------|------------|-------------|----------------|----------------|-------------|------------------|
| Sitagliptin 100mg daily vs Vitamin E 800 IU daily and Pioglitazone 45mg daily       | 0 | Some concerns | Undetected | No concerns | Major concerns | No concerns    | No concerns | Moderate quality |
| Sitagliptin 100mg daily vs Volixibat 10mg daily                                     | 0 | Some concerns | Undetected | No concerns | Major concerns | No concerns    | No concerns | Moderate quality |
| Sitagliptin 100mg daily vs Volixibat 20mg daily                                     | 0 | Some concerns | Undetected | No concerns | Major concerns | No concerns    | No concerns | Moderate quality |
| Sitagliptin 100mg daily vs Volixibat 5mg daily                                      | 0 | Some concerns | Undetected | No concerns | Major concerns | No concerns    | No concerns | Moderate quality |
| omega 3 PUFA (EPA 50.4mg) TID vs Sitagliptin 100mg daily                            | 0 | Some concerns | Undetected | No concerns | Major concerns | No concerns    | No concerns | Moderate quality |
| Telmisartan 40mg daily vs UDCA 23mg/kg day                                          | 0 | Some concerns | Undetected | No concerns | No concerns    | Major concerns | No concerns | Moderate quality |
| Telmisartan 40mg daily vs Vitamin E 800 IU daily and Pioglitazone 45mg daily        | 0 | Some concerns | Undetected | No concerns | Major concerns | No concerns    | No concerns | Moderate quality |
| Telmisartan 40mg daily vs Volixibat 10mg daily                                      | 0 | Some concerns | Undetected | No concerns | No concerns    | Major concerns | No concerns | Moderate quality |
| Telmisartan 40mg daily vs Volixibat 20mg daily                                      | 0 | Some concerns | Undetected | No concerns | Major concerns | No concerns    | No concerns | Moderate quality |
| Telmisartan 40mg daily vs Volixibat 5mg daily                                       | 0 | Some concerns | Undetected | No concerns | Major concerns | No concerns    | No concerns | Moderate quality |
| omega 3 PUFA (EPA 50.4mg) TID vs Telmisartan 40mg daily                             | 0 | Some concerns | Undetected | No concerns | Major concerns | No concerns    | No concerns | Moderate quality |
| UDCA 23mg/kg day vs Vitamin E 800 IU daily                                          | 0 | No concerns   | Undetected | No concerns | Major concerns | No concerns    | No concerns | High quality     |
| UDCA 23mg/kg day vs Vitamin E 800 IU daily and Pioglitazone 45mg daily              | 0 | No concerns   | Undetected | No concerns | No concerns    | Major concerns | No concerns | High quality     |
| UDCA 23mg/kg day vs Volixibat 10mg daily                                            | 0 | No concerns   | Undetected | No concerns | Major concerns | No concerns    | No concerns | High quality     |
| UDCA 23mg/kg day vs Volixibat 20mg daily                                            | 0 | No concerns   | Undetected | No concerns | Major concerns | No concerns    | No concerns | High quality     |
| UDCA 23mg/kg day vs Volixibat 5mg daily                                             | 0 | No concerns   | Undetected | No concerns | Major concerns | No concerns    | No concerns | High quality     |
| omega 3 PUFA (EPA 50.4mg) TID vs UDCA 23mg/kg day                                   | 0 | Some concerns | Undetected | No concerns | Major concerns | No concerns    | No concerns | Moderate quality |
| Vitamin E 800 IU daily vs Volixibat 10mg daily                                      | 0 | No concerns   | Undetected | No concerns | Major concerns | No concerns    | No concerns | High quality     |
| Vitamin E 800 IU daily vs Volixibat 20mg daily                                      | 0 | No concerns   | Undetected | No concerns | Major concerns | No concerns    | No concerns | High quality     |
| Vitamin E 800 IU daily vs Volixibat 5mg daily                                       | 0 | No concerns   | Undetected | No concerns | Major concerns | No concerns    | No concerns | High quality     |
| omega 3 PUFA (EPA 50.4mg) TID vs Vitamin E 800 IU daily                             | 0 | No concerns   | Undetected | No concerns | Major concerns | No concerns    | No concerns | High quality     |
| Vitamin E 800 IU daily and Pioglitazone 45mg daily vs Volixibat 10mg daily          | 0 | No concerns   | Undetected | No concerns | No concerns    | Major concerns | No concerns | High quality     |
| Vitamin E 800 IU daily and Pioglitazone 45mg daily vs Volixibat 20mg daily          | 0 | No concerns   | Undetected | No concerns | Major concerns | No concerns    | No concerns | High quality     |
| Vitamin E 800 IU daily and Pioglitazone 45mg daily vs Volixibat 5mg daily           | 0 | No concerns   | Undetected | No concerns | Major concerns | No concerns    | No concerns | High quality     |
| omega 3 PUFA (EPA 50.4mg) TID vs Vitamin E 800 IU daily and Pioglitazone 45mg daily | 0 | No concerns   | Undetected | No concerns | Major concerns | No concerns    | No concerns | High quality     |

|                                                                                        |                          |                          |                       |                     |                    |                      |                    |                          |
|----------------------------------------------------------------------------------------|--------------------------|--------------------------|-----------------------|---------------------|--------------------|----------------------|--------------------|--------------------------|
| omega 3 PUFA (EPA 50.4mg) TID vs Volixibat 10mg daily                                  | 0                        | No concerns              | Undetected            | No concerns         | Major concerns     | No concerns          | No concerns        | High quality             |
| omega 3 PUFA (EPA 50.4mg) TID vs Volixibat 20mg daily                                  | 0                        | No concerns              | Undetected            | No concerns         | Major concerns     | No concerns          | No concerns        | High quality             |
| omega 3 PUFA (EPA 50.4mg) TID vs Volixibat 5mg daily                                   | 0                        | No concerns              | Undetected            | No concerns         | Major concerns     | No concerns          | No concerns        | High quality             |
| <b><u>Mean change in lobular inflammation score</u></b>                                |                          |                          |                       |                     |                    |                      |                    |                          |
| <b>Comparison</b>                                                                      | <b>Number of studies</b> | <b>Within-study bias</b> | <b>Reporting bias</b> | <b>Indirectness</b> | <b>Imprecision</b> | <b>Heterogeneity</b> | <b>Incoherence</b> | <b>Confidence rating</b> |
| Aldafermin 1mg SQ daily vs Placebo                                                     | 1                        | No concerns              | Undetected            | No concerns         | Major concerns     | No concerns          | No concerns        | High quality             |
| Belapectin 2mg/kg IV biweekly vs Belapectin 8mg/kg IV biweekly                         | 1                        | No concerns              | Suspected             | No concerns         | Major concerns     | No concerns          | No concerns        | Low quality              |
| Belapectin 2mg/kg IV biweekly vs Placebo                                               | 1                        | No concerns              | Suspected             | No concerns         | Major concerns     | No concerns          | No concerns        | Low quality              |
| Belapectin 8mg/kg IV biweekly vs Placebo                                               | 1                        | No concerns              | Suspected             | No concerns         | Major concerns     | No concerns          | No concerns        | Low quality              |
| Colesevelam 3.75g daily vs Placebo                                                     | 1                        | No concerns              | Undetected            | No concerns         | Major concerns     | No concerns          | No concerns        | High quality             |
| Liraglutide 1.8mg daily vs Placebo                                                     | 1                        | No concerns              | Suspected             | No concerns         | Major concerns     | No concerns          | No concerns        | Low quality              |
| Metadoxine 500mg BID vs Placebo                                                        | 1                        | Some concerns            | Undetected            | No concerns         | Major concerns     | No concerns          | No concerns        | Moderate quality         |
| Obeticholic acid 25mg daily vs Placebo                                                 | 1                        | No concerns              | Undetected            | No concerns         | Major concerns     | No concerns          | No concerns        | High quality             |
| Pentoxifylline 400mg TID vs Pioglitazone 30mg daily                                    | 1                        | No concerns              | Undetected            | No concerns         | Major concerns     | No concerns          | No concerns        | High quality             |
| Pentoxifylline 400mg TID vs Placebo                                                    | 2                        | No concerns              | Suspected             | No concerns         | No concerns        | Major concerns       | No concerns        | Low quality              |
| Pioglitazone 30mg daily vs Placebo                                                     | 1                        | No concerns              | Undetected            | No concerns         | No concerns        | Major concerns       | No concerns        | High quality             |
| Pioglitazone 30mg daily vs Vitamin E 800 IU daily                                      | 1                        | No concerns              | Undetected            | No concerns         | Major concerns     | No concerns          | No concerns        | High quality             |
| Pioglitazone 45mg daily vs Placebo                                                     | 1                        | No concerns              | Undetected            | No concerns         | No concerns        | Major concerns       | No concerns        | High quality             |
| Placebo vs Rosiglitazone 8mg daily                                                     | 1                        | No concerns              | Undetected            | No concerns         | Major concerns     | No concerns          | No concerns        | High quality             |
| Placebo vs Sitagliptin 100mg daily                                                     | 2                        | Some concerns            | Undetected            | No concerns         | Major concerns     | No concerns          | No concerns        | Moderate quality         |
| Placebo vs UDCA 23mg/kg day                                                            | 1                        | Some concerns            | Suspected             | No concerns         | Major concerns     | No concerns          | No concerns        | Low quality              |
| Placebo vs Vitamin E 800 IU daily                                                      | 2                        | No concerns              | Undetected            | No concerns         | No concerns        | Major concerns       | No concerns        | High quality             |
| Placebo vs Vitamin E 800 IU daily and Pioglitazone 45mg daily                          | 1                        | No concerns              | Undetected            | No concerns         | No concerns        | Major concerns       | No concerns        | High quality             |
| Placebo vs Volixibat 10mg daily                                                        | 1                        | No concerns              | Undetected            | No concerns         | Major concerns     | No concerns          | No concerns        | High quality             |
| Placebo vs Volixibat 20mg daily                                                        | 1                        | No concerns              | Undetected            | No concerns         | Major concerns     | No concerns          | No concerns        | High quality             |
| Placebo vs Volixibat 5mg daily                                                         | 1                        | No concerns              | Undetected            | No concerns         | Major concerns     | No concerns          | No concerns        | High quality             |
| omega 3 PUFA (EPA 50.4mg) TID vs Placebo                                               | 1                        | No concerns              | Suspected             | No concerns         | Major concerns     | No concerns          | No concerns        | Low quality              |
| Rosiglitazone 8mg and Losartan 50mg daily vs Rosiglitazone 8mg and Metformin 500mg BID | 1                        | Major concerns           | Undetected            | No concerns         | Major concerns     | No concerns          | No concerns        | Low quality              |
| Rosiglitazone 8mg and Losartan 50mg daily vs Rosiglitazone 8mg daily                   | 1                        | Major concerns           | Undetected            | No concerns         | Major concerns     | No concerns          | No concerns        | Low quality              |

|                                                                               |   |                |            |             |                |             |             |                  |
|-------------------------------------------------------------------------------|---|----------------|------------|-------------|----------------|-------------|-------------|------------------|
| Rosiglitazone 8mg and Metformin 500mg BID vs Rosiglitazone 8mg daily          | 1 | Major concerns | Undetected | No concerns | Major concerns | No concerns | No concerns | Low quality      |
| Telmisartan 40mg daily vs Vitamin E 800 IU daily                              | 1 | Major concerns | Undetected | No concerns | Major concerns | No concerns | No concerns | Low quality      |
| Vitamin E 800 IU daily vs Vitamin E 800 IU daily and Pioglitazone 45mg daily  | 1 | No concerns    | Undetected | No concerns | Major concerns | No concerns | No concerns | High quality     |
| Volixibat 10mg daily vs Volixibat 20mg daily                                  | 1 | No concerns    | Undetected | No concerns | Major concerns | No concerns | No concerns | High quality     |
| Volixibat 10mg daily vs Volixibat 5mg daily                                   | 1 | No concerns    | Undetected | No concerns | Major concerns | No concerns | No concerns | High quality     |
| Volixibat 20mg daily vs Volixibat 5mg daily                                   | 1 | No concerns    | Undetected | No concerns | Major concerns | No concerns | No concerns | High quality     |
| Aldafermin 1mg SQ daily vs Belapectin 2mg/kg IV biweekly                      | 0 | No concerns    | Undetected | No concerns | Major concerns | No concerns | No concerns | High quality     |
| Aldafermin 1mg SQ daily vs Belapectin 8mg/kg IV biweekly                      | 0 | No concerns    | Undetected | No concerns | Major concerns | No concerns | No concerns | High quality     |
| Aldafermin 1mg SQ daily vs Colesevelam 3.75g daily                            | 0 | No concerns    | Undetected | No concerns | Major concerns | No concerns | No concerns | High quality     |
| Aldafermin 1mg SQ daily vs Liraglutide 1.8mg daily                            | 0 | No concerns    | Undetected | No concerns | Major concerns | No concerns | No concerns | High quality     |
| Aldafermin 1mg SQ daily vs Metadoxine 500mg BID                               | 0 | Some concerns  | Undetected | No concerns | Major concerns | No concerns | No concerns | Moderate quality |
| Aldafermin 1mg SQ daily vs Obeticholic acid 25mg daily                        | 0 | No concerns    | Undetected | No concerns | Major concerns | No concerns | No concerns | High quality     |
| Aldafermin 1mg SQ daily vs Pentoxifylline 400mg TID                           | 0 | No concerns    | Undetected | No concerns | Major concerns | No concerns | No concerns | High quality     |
| Aldafermin 1mg SQ daily vs Pioglitazone 30mg daily                            | 0 | No concerns    | Undetected | No concerns | Major concerns | No concerns | No concerns | High quality     |
| Aldafermin 1mg SQ daily vs Pioglitazone 45mg daily                            | 0 | No concerns    | Undetected | No concerns | Major concerns | No concerns | No concerns | High quality     |
| Aldafermin 1mg SQ daily vs Rosiglitazone 8mg and Losartan 50mg daily          | 0 | Some concerns  | Undetected | No concerns | Major concerns | No concerns | No concerns | Moderate quality |
| Aldafermin 1mg SQ daily vs Rosiglitazone 8mg and Metformin 500mg BID          | 0 | Some concerns  | Undetected | No concerns | Major concerns | No concerns | No concerns | Moderate quality |
| Aldafermin 1mg SQ daily vs Rosiglitazone 8mg daily                            | 0 | No concerns    | Undetected | No concerns | Major concerns | No concerns | No concerns | High quality     |
| Aldafermin 1mg SQ daily vs Sitagliptin 100mg daily                            | 0 | Some concerns  | Undetected | No concerns | Major concerns | No concerns | No concerns | Moderate quality |
| Aldafermin 1mg SQ daily vs Telmisartan 40mg daily                             | 0 | Some concerns  | Undetected | No concerns | Major concerns | No concerns | No concerns | Moderate quality |
| Aldafermin 1mg SQ daily vs UDCA 23mg/kg day                                   | 0 | Some concerns  | Undetected | No concerns | Major concerns | No concerns | No concerns | Moderate quality |
| Aldafermin 1mg SQ daily vs Vitamin E 800 IU daily                             | 0 | No concerns    | Undetected | No concerns | Major concerns | No concerns | No concerns | High quality     |
| Aldafermin 1mg SQ daily vs Vitamin E 800 IU daily and Pioglitazone 45mg daily | 0 | No concerns    | Undetected | No concerns | Major concerns | No concerns | No concerns | High quality     |
| Aldafermin 1mg SQ daily vs Volixibat 10mg daily                               | 0 | No concerns    | Undetected | No concerns | Major concerns | No concerns | No concerns | High quality     |
| Aldafermin 1mg SQ daily vs Volixibat 20mg daily                               | 0 | No concerns    | Undetected | No concerns | Major concerns | No concerns | No concerns | High quality     |

|                                                                                     |   |               |            |             |                |                |             |                  |
|-------------------------------------------------------------------------------------|---|---------------|------------|-------------|----------------|----------------|-------------|------------------|
| Aldafermin 1mg SQ daily vs Volixibat 5mg daily                                      | 0 | No concerns   | Undetected | No concerns | Major concerns | No concerns    | No concerns | High quality     |
| Aldafermin 1mg SQ daily vs omega 3 PUFA (EPA 50.4mg) TID                            | 0 | No concerns   | Undetected | No concerns | No concerns    | Major concerns | No concerns | High quality     |
| Belapectin 2mg/kg IV biweekly vs Colesevelam 3.75g daily                            | 0 | No concerns   | Undetected | No concerns | Major concerns | No concerns    | No concerns | High quality     |
| Belapectin 2mg/kg IV biweekly vs Liraglutide 1.8mg daily                            | 0 | No concerns   | Undetected | No concerns | Major concerns | No concerns    | No concerns | High quality     |
| Belapectin 2mg/kg IV biweekly vs Metadoxine 500mg BID                               | 0 | No concerns   | Undetected | No concerns | Major concerns | No concerns    | No concerns | High quality     |
| Belapectin 2mg/kg IV biweekly vs Obeticholic acid 25mg daily                        | 0 | No concerns   | Undetected | No concerns | Major concerns | No concerns    | No concerns | High quality     |
| Belapectin 2mg/kg IV biweekly vs Pentoxifylline 400mg TID                           | 0 | No concerns   | Undetected | No concerns | Major concerns | No concerns    | No concerns | High quality     |
| Belapectin 2mg/kg IV biweekly vs Pioglitazone 30mg daily                            | 0 | No concerns   | Undetected | No concerns | Major concerns | No concerns    | No concerns | High quality     |
| Belapectin 2mg/kg IV biweekly vs Pioglitazone 45mg daily                            | 0 | No concerns   | Undetected | No concerns | Major concerns | No concerns    | No concerns | High quality     |
| Belapectin 2mg/kg IV biweekly vs Rosiglitazone 8mg and Losartan 50mg daily          | 0 | Some concerns | Undetected | No concerns | Major concerns | No concerns    | No concerns | Moderate quality |
| Belapectin 2mg/kg IV biweekly vs Rosiglitazone 8mg and Metformin 500mg BID          | 0 | Some concerns | Undetected | No concerns | Major concerns | No concerns    | No concerns | Moderate quality |
| Belapectin 2mg/kg IV biweekly vs Rosiglitazone 8mg daily                            | 0 | No concerns   | Undetected | No concerns | Major concerns | No concerns    | No concerns | High quality     |
| Belapectin 2mg/kg IV biweekly vs Sitagliptin 100mg daily                            | 0 | Some concerns | Undetected | No concerns | Major concerns | No concerns    | No concerns | Moderate quality |
| Belapectin 2mg/kg IV biweekly vs Telmisartan 40mg daily                             | 0 | Some concerns | Undetected | No concerns | Major concerns | No concerns    | No concerns | Moderate quality |
| Belapectin 2mg/kg IV biweekly vs UDCA 23mg/kg day                                   | 0 | No concerns   | Undetected | No concerns | Major concerns | No concerns    | No concerns | High quality     |
| Belapectin 2mg/kg IV biweekly vs Vitamin E 800 IU daily                             | 0 | No concerns   | Undetected | No concerns | Major concerns | No concerns    | No concerns | High quality     |
| Belapectin 2mg/kg IV biweekly vs Vitamin E 800 IU daily and Pioglitazone 45mg daily | 0 | No concerns   | Undetected | No concerns | Major concerns | No concerns    | No concerns | High quality     |
| Belapectin 2mg/kg IV biweekly vs Volixibat 10mg daily                               | 0 | No concerns   | Undetected | No concerns | Major concerns | No concerns    | No concerns | High quality     |
| Belapectin 2mg/kg IV biweekly vs Volixibat 20mg daily                               | 0 | No concerns   | Undetected | No concerns | Major concerns | No concerns    | No concerns | High quality     |
| Belapectin 2mg/kg IV biweekly vs Volixibat 5mg daily                                | 0 | No concerns   | Undetected | No concerns | Major concerns | No concerns    | No concerns | High quality     |
| Belapectin 2mg/kg IV biweekly vs omega 3 PUFA (EPA 50.4mg) TID                      | 0 | No concerns   | Undetected | No concerns | Major concerns | No concerns    | No concerns | High quality     |
| Belapectin 8mg/kg IV biweekly vs Colesevelam 3.75g daily                            | 0 | No concerns   | Undetected | No concerns | Major concerns | No concerns    | No concerns | High quality     |
| Belapectin 8mg/kg IV biweekly vs Liraglutide 1.8mg daily                            | 0 | No concerns   | Undetected | No concerns | Major concerns | No concerns    | No concerns | High quality     |
| Belapectin 8mg/kg IV biweekly vs Metadoxine 500mg BID                               | 0 | No concerns   | Undetected | No concerns | Major concerns | No concerns    | No concerns | High quality     |
| Belapectin 8mg/kg IV biweekly vs Obeticholic acid 25mg daily                        | 0 | No concerns   | Undetected | No concerns | Major concerns | No concerns    | No concerns | High quality     |

|                                                                                     |   |               |            |             |                |                |             |                  |
|-------------------------------------------------------------------------------------|---|---------------|------------|-------------|----------------|----------------|-------------|------------------|
| Belapectin 8mg/kg IV biweekly vs Pentoxifylline 400mg TID                           | 0 | No concerns   | Undetected | No concerns | Major concerns | No concerns    | No concerns | High quality     |
| Belapectin 8mg/kg IV biweekly vs Pioglitazone 30mg daily                            | 0 | No concerns   | Undetected | No concerns | No concerns    | Major concerns | No concerns | High quality     |
| Belapectin 8mg/kg IV biweekly vs Pioglitazone 45mg daily                            | 0 | No concerns   | Undetected | No concerns | Major concerns | No concerns    | No concerns | High quality     |
| Belapectin 8mg/kg IV biweekly vs Rosiglitazone 8mg and Losartan 50mg daily          | 0 | Some concerns | Undetected | No concerns | Major concerns | No concerns    | No concerns | Moderate quality |
| Belapectin 8mg/kg IV biweekly vs Rosiglitazone 8mg and Metformin 500mg BID          | 0 | Some concerns | Undetected | No concerns | Major concerns | No concerns    | No concerns | Moderate quality |
| Belapectin 8mg/kg IV biweekly vs Rosiglitazone 8mg daily                            | 0 | No concerns   | Undetected | No concerns | Major concerns | No concerns    | No concerns | High quality     |
| Belapectin 8mg/kg IV biweekly vs Sitagliptin 100mg daily                            | 0 | Some concerns | Undetected | No concerns | Major concerns | No concerns    | No concerns | Moderate quality |
| Belapectin 8mg/kg IV biweekly vs Telmisartan 40mg daily                             | 0 | Some concerns | Undetected | No concerns | Major concerns | No concerns    | No concerns | Moderate quality |
| Belapectin 8mg/kg IV biweekly vs UDCA 23mg/kg day                                   | 0 | No concerns   | Undetected | No concerns | Major concerns | No concerns    | No concerns | High quality     |
| Belapectin 8mg/kg IV biweekly vs Vitamin E 800 IU daily                             | 0 | No concerns   | Undetected | No concerns | Major concerns | No concerns    | No concerns | High quality     |
| Belapectin 8mg/kg IV biweekly vs Vitamin E 800 IU daily and Pioglitazone 45mg daily | 0 | No concerns   | Undetected | No concerns | Major concerns | No concerns    | No concerns | High quality     |
| Belapectin 8mg/kg IV biweekly vs Volixibat 10mg daily                               | 0 | No concerns   | Undetected | No concerns | Major concerns | No concerns    | No concerns | High quality     |
| Belapectin 8mg/kg IV biweekly vs Volixibat 20mg daily                               | 0 | No concerns   | Undetected | No concerns | Major concerns | No concerns    | No concerns | High quality     |
| Belapectin 8mg/kg IV biweekly vs Volixibat 5mg daily                                | 0 | No concerns   | Undetected | No concerns | Major concerns | No concerns    | No concerns | High quality     |
| Belapectin 8mg/kg IV biweekly vs omega 3 PUFA (EPA 50.4mg) TID                      | 0 | No concerns   | Undetected | No concerns | Major concerns | No concerns    | No concerns | High quality     |
| Colesevelam 3.75g daily vs Liraglutide 1.8mg daily                                  | 0 | No concerns   | Undetected | No concerns | Major concerns | No concerns    | No concerns | High quality     |
| Colesevelam 3.75g daily vs Metadoxine 500mg BID                                     | 0 | Some concerns | Undetected | No concerns | Major concerns | No concerns    | No concerns | Moderate quality |
| Colesevelam 3.75g daily vs Obeticholic acid 25mg daily                              | 0 | No concerns   | Undetected | No concerns | Major concerns | No concerns    | No concerns | High quality     |
| Colesevelam 3.75g daily vs Pentoxifylline 400mg TID                                 | 0 | No concerns   | Undetected | No concerns | Major concerns | No concerns    | No concerns | High quality     |
| Colesevelam 3.75g daily vs Pioglitazone 30mg daily                                  | 0 | No concerns   | Undetected | No concerns | Major concerns | No concerns    | No concerns | High quality     |
| Colesevelam 3.75g daily vs Pioglitazone 45mg daily                                  | 0 | No concerns   | Undetected | No concerns | Major concerns | No concerns    | No concerns | High quality     |
| Colesevelam 3.75g daily vs Rosiglitazone 8mg and Losartan 50mg daily                | 0 | Some concerns | Undetected | No concerns | Major concerns | No concerns    | No concerns | Moderate quality |
| Colesevelam 3.75g daily vs Rosiglitazone 8mg and Metformin 500mg BID                | 0 | Some concerns | Undetected | No concerns | Major concerns | No concerns    | No concerns | Moderate quality |
| Colesevelam 3.75g daily vs Rosiglitazone 8mg daily                                  | 0 | No concerns   | Undetected | No concerns | Major concerns | No concerns    | No concerns | High quality     |

|                                                                               |   |               |            |             |                |                |             |                  |
|-------------------------------------------------------------------------------|---|---------------|------------|-------------|----------------|----------------|-------------|------------------|
| Colesevelam 3.75g daily vs Sitagliptin 100mg daily                            | 0 | Some concerns | Undetected | No concerns | Major concerns | No concerns    | No concerns | Moderate quality |
| Colesevelam 3.75g daily vs Telmisartan 40mg daily                             | 0 | Some concerns | Undetected | No concerns | Major concerns | No concerns    | No concerns | Moderate quality |
| Colesevelam 3.75g daily vs UDCA 23mg/kg day                                   | 0 | Some concerns | Undetected | No concerns | Major concerns | No concerns    | No concerns | Moderate quality |
| Colesevelam 3.75g daily vs Vitamin E 800 IU daily                             | 0 | No concerns   | Undetected | No concerns | Major concerns | No concerns    | No concerns | High quality     |
| Colesevelam 3.75g daily vs Vitamin E 800 IU daily and Pioglitazone 45mg daily | 0 | No concerns   | Undetected | No concerns | Major concerns | No concerns    | No concerns | High quality     |
| Colesevelam 3.75g daily vs Volixibat 10mg daily                               | 0 | No concerns   | Undetected | No concerns | Major concerns | No concerns    | No concerns | High quality     |
| Colesevelam 3.75g daily vs Volixibat 20mg daily                               | 0 | No concerns   | Undetected | No concerns | Major concerns | No concerns    | No concerns | High quality     |
| Colesevelam 3.75g daily vs Volixibat 5mg daily                                | 0 | No concerns   | Undetected | No concerns | No concerns    | Major concerns | No concerns | High quality     |
| Colesevelam 3.75g daily vs omega 3 PUFA (EPA 50.4mg) TID                      | 0 | No concerns   | Undetected | No concerns | No concerns    | Major concerns | No concerns | High quality     |
| Liraglutide 1.8mg daily vs Metadoxine 500mg BID                               | 0 | Some concerns | Undetected | No concerns | Major concerns | No concerns    | No concerns | Moderate quality |
| Liraglutide 1.8mg daily vs Obeticholic acid 25mg daily                        | 0 | No concerns   | Undetected | No concerns | Major concerns | No concerns    | No concerns | High quality     |
| Liraglutide 1.8mg daily vs Pentoxifylline 400mg TID                           | 0 | No concerns   | Undetected | No concerns | Major concerns | No concerns    | No concerns | High quality     |
| Liraglutide 1.8mg daily vs Pioglitazone 30mg daily                            | 0 | No concerns   | Undetected | No concerns | Major concerns | No concerns    | No concerns | High quality     |
| Liraglutide 1.8mg daily vs Pioglitazone 45mg daily                            | 0 | No concerns   | Undetected | No concerns | Major concerns | No concerns    | No concerns | High quality     |
| Liraglutide 1.8mg daily vs Rosiglitazone 8mg and Losartan 50mg daily          | 0 | Some concerns | Undetected | No concerns | Major concerns | No concerns    | No concerns | Moderate quality |
| Liraglutide 1.8mg daily vs Rosiglitazone 8mg and Metformin 500mg BID          | 0 | Some concerns | Undetected | No concerns | Major concerns | No concerns    | No concerns | Moderate quality |
| Liraglutide 1.8mg daily vs Rosiglitazone 8mg daily                            | 0 | No concerns   | Undetected | No concerns | Major concerns | No concerns    | No concerns | High quality     |
| Liraglutide 1.8mg daily vs Sitagliptin 100mg daily                            | 0 | Some concerns | Undetected | No concerns | Major concerns | No concerns    | No concerns | Moderate quality |
| Liraglutide 1.8mg daily vs Telmisartan 40mg daily                             | 0 | Some concerns | Undetected | No concerns | Major concerns | No concerns    | No concerns | Moderate quality |
| Liraglutide 1.8mg daily vs UDCA 23mg/kg day                                   | 0 | Some concerns | Undetected | No concerns | Major concerns | No concerns    | No concerns | Moderate quality |
| Liraglutide 1.8mg daily vs Vitamin E 800 IU daily                             | 0 | No concerns   | Undetected | No concerns | Major concerns | No concerns    | No concerns | High quality     |
| Liraglutide 1.8mg daily vs Vitamin E 800 IU daily and Pioglitazone 45mg daily | 0 | No concerns   | Undetected | No concerns | Major concerns | No concerns    | No concerns | High quality     |
| Liraglutide 1.8mg daily vs Volixibat 10mg daily                               | 0 | No concerns   | Undetected | No concerns | Major concerns | No concerns    | No concerns | High quality     |
| Liraglutide 1.8mg daily vs Volixibat 20mg daily                               | 0 | No concerns   | Undetected | No concerns | Major concerns | No concerns    | No concerns | High quality     |
| Liraglutide 1.8mg daily vs Volixibat 5mg daily                                | 0 | No concerns   | Undetected | No concerns | Major concerns | No concerns    | No concerns | High quality     |



|                                                                            |   |               |            |             |                |             |             |                  |
|----------------------------------------------------------------------------|---|---------------|------------|-------------|----------------|-------------|-------------|------------------|
| Liraglutide 1.8mg daily vs omega 3 PUFA (EPA 50.4mg) TID                   | 0 | No concerns   | Undetected | No concerns | Major concerns | No concerns | No concerns | High quality     |
| Metadoxine 500mg BID vs Obeticholic acid 25mg daily                        | 0 | Some concerns | Undetected | No concerns | Major concerns | No concerns | No concerns | Moderate quality |
| Metadoxine 500mg BID vs Pentoxifylline 400mg TID                           | 0 | Some concerns | Undetected | No concerns | Major concerns | No concerns | No concerns | Moderate quality |
| Metadoxine 500mg BID vs Pioglitazone 30mg daily                            | 0 | No concerns   | Undetected | No concerns | Major concerns | No concerns | No concerns | High quality     |
| Metadoxine 500mg BID vs Pioglitazone 45mg daily                            | 0 | Some concerns | Undetected | No concerns | Major concerns | No concerns | No concerns | Moderate quality |
| Metadoxine 500mg BID vs Rosiglitazone 8mg and Losartan 50mg daily          | 0 | Some concerns | Undetected | No concerns | Major concerns | No concerns | No concerns | Moderate quality |
| Metadoxine 500mg BID vs Rosiglitazone 8mg and Metformin 500mg BID          | 0 | Some concerns | Undetected | No concerns | Major concerns | No concerns | No concerns | Moderate quality |
| Metadoxine 500mg BID vs Rosiglitazone 8mg daily                            | 0 | Some concerns | Undetected | No concerns | Major concerns | No concerns | No concerns | Moderate quality |
| Metadoxine 500mg BID vs Sitagliptin 100mg daily                            | 0 | Some concerns | Undetected | No concerns | Major concerns | No concerns | No concerns | Moderate quality |
| Metadoxine 500mg BID vs Telmisartan 40mg daily                             | 0 | Some concerns | Undetected | No concerns | Major concerns | No concerns | No concerns | Moderate quality |
| Metadoxine 500mg BID vs UDCA 23mg/kg day                                   | 0 | Some concerns | Undetected | No concerns | Major concerns | No concerns | No concerns | Moderate quality |
| Metadoxine 500mg BID vs Vitamin E 800 IU daily                             | 0 | No concerns   | Undetected | No concerns | Major concerns | No concerns | No concerns | High quality     |
| Metadoxine 500mg BID vs Vitamin E 800 IU daily and Pioglitazone 45mg daily | 0 | No concerns   | Undetected | No concerns | Major concerns | No concerns | No concerns | High quality     |
| Metadoxine 500mg BID vs Volixibat 10mg daily                               | 0 | No concerns   | Undetected | No concerns | Major concerns | No concerns | No concerns | High quality     |
| Metadoxine 500mg BID vs Volixibat 20mg daily                               | 0 | No concerns   | Undetected | No concerns | Major concerns | No concerns | No concerns | High quality     |
| Metadoxine 500mg BID vs Volixibat 5mg daily                                | 0 | No concerns   | Undetected | No concerns | Major concerns | No concerns | No concerns | High quality     |
| Metadoxine 500mg BID vs omega 3 PUFA (EPA 50.4mg) TID                      | 0 | Some concerns | Undetected | No concerns | Major concerns | No concerns | No concerns | Moderate quality |
| Obeticholic acid 25mg daily vs Pentoxifylline 400mg TID                    | 0 | No concerns   | Undetected | No concerns | Major concerns | No concerns | No concerns | High quality     |
| Obeticholic acid 25mg daily vs Pioglitazone 30mg daily                     | 0 | No concerns   | Undetected | No concerns | Major concerns | No concerns | No concerns | High quality     |
| Obeticholic acid 25mg daily vs Pioglitazone 45mg daily                     | 0 | No concerns   | Undetected | No concerns | Major concerns | No concerns | No concerns | High quality     |
| Obeticholic acid 25mg daily vs Rosiglitazone 8mg and Losartan 50mg daily   | 0 | Some concerns | Undetected | No concerns | Major concerns | No concerns | No concerns | Moderate quality |
| Obeticholic acid 25mg daily vs Rosiglitazone 8mg and Metformin 500mg BID   | 0 | Some concerns | Undetected | No concerns | Major concerns | No concerns | No concerns | Moderate quality |
| Obeticholic acid 25mg daily vs Rosiglitazone 8mg daily                     | 0 | No concerns   | Undetected | No concerns | Major concerns | No concerns | No concerns | High quality     |
| Obeticholic acid 25mg daily vs Sitagliptin 100mg daily                     | 0 | Some concerns | Undetected | No concerns | Major concerns | No concerns | No concerns | Moderate quality |



|                                                                                   |   |               |            |             |                |                |             |                  |
|-----------------------------------------------------------------------------------|---|---------------|------------|-------------|----------------|----------------|-------------|------------------|
| Obeticholic acid 25mg daily vs Telmisartan 40mg daily                             | 0 | Some concerns | Undetected | No concerns | Major concerns | No concerns    | No concerns | Moderate quality |
| Obeticholic acid 25mg daily vs UDCA 23mg/kg day                                   | 0 | Some concerns | Undetected | No concerns | Major concerns | No concerns    | No concerns | Moderate quality |
| Obeticholic acid 25mg daily vs Vitamin E 800 IU daily                             | 0 | No concerns   | Undetected | No concerns | Major concerns | No concerns    | No concerns | High quality     |
| Obeticholic acid 25mg daily vs Vitamin E 800 IU daily and Pioglitazone 45mg daily | 0 | No concerns   | Undetected | No concerns | Major concerns | No concerns    | No concerns | High quality     |
| Obeticholic acid 25mg daily vs Volixibat 10mg daily                               | 0 | No concerns   | Undetected | No concerns | Major concerns | No concerns    | No concerns | High quality     |
| Obeticholic acid 25mg daily vs Volixibat 20mg daily                               | 0 | No concerns   | Undetected | No concerns | Major concerns | No concerns    | No concerns | High quality     |
| Obeticholic acid 25mg daily vs Volixibat 5mg daily                                | 0 | No concerns   | Undetected | No concerns | Major concerns | No concerns    | No concerns | High quality     |
| Obeticholic acid 25mg daily vs omega 3 PUFA (EPA 50.4mg) TID                      | 0 | No concerns   | Undetected | No concerns | No concerns    | Major concerns | No concerns | High quality     |
| Pentoxifylline 400mg TID vs Pioglitazone 45mg daily                               | 0 | No concerns   | Undetected | No concerns | Major concerns | No concerns    | No concerns | High quality     |
| Pentoxifylline 400mg TID vs Rosiglitazone 8mg and Losartan 50mg daily             | 0 | Some concerns | Undetected | No concerns | Major concerns | No concerns    | No concerns | Moderate quality |
| Pentoxifylline 400mg TID vs Rosiglitazone 8mg and Metformin 500mg BID             | 0 | Some concerns | Undetected | No concerns | Major concerns | No concerns    | No concerns | Moderate quality |
| Pentoxifylline 400mg TID vs Rosiglitazone 8mg daily                               | 0 | No concerns   | Undetected | No concerns | Major concerns | No concerns    | No concerns | High quality     |
| Pentoxifylline 400mg TID vs Sitagliptin 100mg daily                               | 0 | Some concerns | Undetected | No concerns | Major concerns | No concerns    | No concerns | Moderate quality |
| Pentoxifylline 400mg TID vs Telmisartan 40mg daily                                | 0 | Some concerns | Undetected | No concerns | Major concerns | No concerns    | No concerns | Moderate quality |
| Pentoxifylline 400mg TID vs UDCA 23mg/kg day                                      | 0 | Some concerns | Undetected | No concerns | Major concerns | No concerns    | No concerns | Moderate quality |
| Pentoxifylline 400mg TID vs Vitamin E 800 IU daily                                | 0 | No concerns   | Undetected | No concerns | Major concerns | No concerns    | No concerns | High quality     |
| Pentoxifylline 400mg TID vs Vitamin E 800 IU daily and Pioglitazone 45mg daily    | 0 | No concerns   | Undetected | No concerns | Major concerns | No concerns    | No concerns | High quality     |
| Pentoxifylline 400mg TID vs Volixibat 10mg daily                                  | 0 | No concerns   | Undetected | No concerns | Major concerns | No concerns    | No concerns | High quality     |
| Pentoxifylline 400mg TID vs Volixibat 20mg daily                                  | 0 | No concerns   | Undetected | No concerns | Major concerns | No concerns    | No concerns | High quality     |
| Pentoxifylline 400mg TID vs Volixibat 5mg daily                                   | 0 | No concerns   | Undetected | No concerns | No concerns    | Major concerns | No concerns | High quality     |
| omega 3 PUFA (EPA 50.4mg) TID vs Pentoxifylline 400mg TID                         | 0 | No concerns   | Undetected | No concerns | No concerns    | Major concerns | No concerns | High quality     |
| Pioglitazone 30mg daily vs Pioglitazone 45mg daily                                | 0 | No concerns   | Undetected | No concerns | Major concerns | No concerns    | No concerns | High quality     |
| Pioglitazone 30mg daily vs Rosiglitazone 8mg and Losartan 50mg daily              | 0 | Some concerns | Undetected | No concerns | Major concerns | No concerns    | No concerns | Moderate quality |

|                                                                               |   |               |            |             |                |                |             |                  |
|-------------------------------------------------------------------------------|---|---------------|------------|-------------|----------------|----------------|-------------|------------------|
| Pioglitazone 30mg daily vs Rosiglitazone 8mg and Metformin 500mg BID          | 0 | Some concerns | Undetected | No concerns | Major concerns | No concerns    | No concerns | Moderate quality |
| Pioglitazone 30mg daily vs Rosiglitazone 8mg daily                            | 0 | No concerns   | Undetected | No concerns | Major concerns | No concerns    | No concerns | High quality     |
| Pioglitazone 30mg daily vs Sitagliptin 100mg daily                            | 0 | Some concerns | Undetected | No concerns | No concerns    | Major concerns | No concerns | Moderate quality |
| Pioglitazone 30mg daily vs Telmisartan 40mg daily                             | 0 | Some concerns | Undetected | No concerns | Major concerns | No concerns    | No concerns | Moderate quality |
| Pioglitazone 30mg daily vs UDCA 23mg/kg day                                   | 0 | No concerns   | Undetected | No concerns | Major concerns | No concerns    | No concerns | High quality     |
| Pioglitazone 30mg daily vs Vitamin E 800 IU daily and Pioglitazone 45mg daily | 0 | No concerns   | Undetected | No concerns | Major concerns | No concerns    | No concerns | High quality     |
| Pioglitazone 30mg daily vs Volixibat 10mg daily                               | 0 | No concerns   | Undetected | No concerns | Major concerns | No concerns    | No concerns | High quality     |
| Pioglitazone 30mg daily vs Volixibat 20mg daily                               | 0 | No concerns   | Undetected | No concerns | Major concerns | No concerns    | No concerns | High quality     |
| Pioglitazone 30mg daily vs Volixibat 5mg daily                                | 0 | No concerns   | Undetected | No concerns | No concerns    | Major concerns | No concerns | High quality     |
| omega 3 PUFA (EPA 50.4mg) TID vs Pioglitazone 30mg daily                      | 0 | No concerns   | Undetected | No concerns | No concerns    | Major concerns | No concerns | High quality     |
| Pioglitazone 45mg daily vs Rosiglitazone 8mg and Losartan 50mg daily          | 0 | Some concerns | Undetected | No concerns | Major concerns | No concerns    | No concerns | Moderate quality |
| Pioglitazone 45mg daily vs Rosiglitazone 8mg and Metformin 500mg BID          | 0 | Some concerns | Undetected | No concerns | Major concerns | No concerns    | No concerns | Moderate quality |
| Pioglitazone 45mg daily vs Rosiglitazone 8mg daily                            | 0 | No concerns   | Undetected | No concerns | Major concerns | No concerns    | No concerns | High quality     |
| Pioglitazone 45mg daily vs Sitagliptin 100mg daily                            | 0 | Some concerns | Undetected | No concerns | Major concerns | No concerns    | No concerns | Moderate quality |
| Pioglitazone 45mg daily vs Telmisartan 40mg daily                             | 0 | Some concerns | Undetected | No concerns | Major concerns | No concerns    | No concerns | Moderate quality |
| Pioglitazone 45mg daily vs UDCA 23mg/kg day                                   | 0 | Some concerns | Undetected | No concerns | Major concerns | No concerns    | No concerns | Moderate quality |
| Pioglitazone 45mg daily vs Vitamin E 800 IU daily                             | 0 | No concerns   | Undetected | No concerns | Major concerns | No concerns    | No concerns | High quality     |
| Pioglitazone 45mg daily vs Vitamin E 800 IU daily and Pioglitazone 45mg daily | 0 | No concerns   | Undetected | No concerns | Major concerns | No concerns    | No concerns | High quality     |
| Pioglitazone 45mg daily vs Volixibat 10mg daily                               | 0 | No concerns   | Undetected | No concerns | Major concerns | No concerns    | No concerns | High quality     |
| Pioglitazone 45mg daily vs Volixibat 20mg daily                               | 0 | No concerns   | Undetected | No concerns | Major concerns | No concerns    | No concerns | High quality     |
| Pioglitazone 45mg daily vs Volixibat 5mg daily                                | 0 | No concerns   | Undetected | No concerns | No concerns    | Major concerns | No concerns | High quality     |
| omega 3 PUFA (EPA 50.4mg) TID vs Pioglitazone 45mg daily                      | 0 | No concerns   | Undetected | No concerns | No concerns    | Major concerns | No concerns | High quality     |
| Placebo vs Rosiglitazone 8mg and Losartan 50mg daily                          | 0 | Some concerns | Undetected | No concerns | Major concerns | No concerns    | No concerns | Moderate quality |
| Placebo vs Rosiglitazone 8mg and Metformin 500mg BID                          | 0 | Some concerns | Undetected | No concerns | Major concerns | No concerns    | No concerns | Moderate quality |



|                                                                               |   |               |            |             |                |                |             |                  |
|-------------------------------------------------------------------------------|---|---------------|------------|-------------|----------------|----------------|-------------|------------------|
| Rosiglitazone 8mg daily vs Volixibat 10mg daily                               | 0 | No concerns   | Undetected | No concerns | Major concerns | No concerns    | No concerns | High quality     |
| Rosiglitazone 8mg daily vs Volixibat 20mg daily                               | 0 | No concerns   | Undetected | No concerns | Major concerns | No concerns    | No concerns | High quality     |
| Rosiglitazone 8mg daily vs Volixibat 5mg daily                                | 0 | No concerns   | Undetected | No concerns | Major concerns | No concerns    | No concerns | High quality     |
| omega 3 PUFA (EPA 50.4mg) TID vs Rosiglitazone 8mg daily                      | 0 | No concerns   | Undetected | No concerns | Major concerns | No concerns    | No concerns | High quality     |
| Sitagliptin 100mg daily vs Telmisartan 40mg daily                             | 0 | Some concerns | Undetected | No concerns | Major concerns | No concerns    | No concerns | Moderate quality |
| Sitagliptin 100mg daily vs UDCA 23mg/kg day                                   | 0 | Some concerns | Undetected | No concerns | Major concerns | No concerns    | No concerns | Moderate quality |
| Sitagliptin 100mg daily vs Vitamin E 800 IU daily                             | 0 | Some concerns | Undetected | No concerns | Major concerns | No concerns    | No concerns | Moderate quality |
| Sitagliptin 100mg daily vs Vitamin E 800 IU daily and Pioglitazone 45mg daily | 0 | Some concerns | Undetected | No concerns | Major concerns | No concerns    | No concerns | Moderate quality |
| Sitagliptin 100mg daily vs Volixibat 10mg daily                               | 0 | Some concerns | Undetected | No concerns | Major concerns | No concerns    | No concerns | Moderate quality |
| Sitagliptin 100mg daily vs Volixibat 20mg daily                               | 0 | Some concerns | Undetected | No concerns | Major concerns | No concerns    | No concerns | Moderate quality |
| Sitagliptin 100mg daily vs Volixibat 5mg daily                                | 0 | Some concerns | Undetected | No concerns | Major concerns | No concerns    | No concerns | Moderate quality |
| omega 3 PUFA (EPA 50.4mg) TID vs Sitagliptin 100mg daily                      | 0 | Some concerns | Undetected | No concerns | Major concerns | No concerns    | No concerns | Moderate quality |
| Telmisartan 40mg daily vs UDCA 23mg/kg day                                    | 0 | Some concerns | Undetected | No concerns | Major concerns | No concerns    | No concerns | Moderate quality |
| Telmisartan 40mg daily vs Vitamin E 800 IU daily and Pioglitazone 45mg daily  | 0 | Some concerns | Undetected | No concerns | Major concerns | No concerns    | No concerns | Moderate quality |
| Telmisartan 40mg daily vs Volixibat 10mg daily                                | 0 | Some concerns | Undetected | No concerns | Major concerns | No concerns    | No concerns | Moderate quality |
| Telmisartan 40mg daily vs Volixibat 20mg daily                                | 0 | Some concerns | Undetected | No concerns | Major concerns | No concerns    | No concerns | Moderate quality |
| Telmisartan 40mg daily vs Volixibat 5mg daily                                 | 0 | Some concerns | Undetected | No concerns | No concerns    | Major concerns | No concerns | Moderate quality |
| omega 3 PUFA (EPA 50.4mg) TID vs Telmisartan 40mg daily                       | 0 | Some concerns | Undetected | No concerns | No concerns    | Major concerns | No concerns | Moderate quality |
| UDCA 23mg/kg day vs Vitamin E 800 IU daily                                    | 0 | No concerns   | Undetected | No concerns | Major concerns | No concerns    | No concerns | High quality     |
| UDCA 23mg/kg day vs Vitamin E 800 IU daily and Pioglitazone 45mg daily        | 0 | No concerns   | Undetected | No concerns | Major concerns | No concerns    | No concerns | High quality     |
| UDCA 23mg/kg day vs Volixibat 10mg daily                                      | 0 | No concerns   | Undetected | No concerns | Major concerns | No concerns    | No concerns | High quality     |
| UDCA 23mg/kg day vs Volixibat 20mg daily                                      | 0 | No concerns   | Undetected | No concerns | Major concerns | No concerns    | No concerns | High quality     |
| UDCA 23mg/kg day vs Volixibat 5mg daily                                       | 0 | No concerns   | Undetected | No concerns | Major concerns | No concerns    | No concerns | High quality     |
| omega 3 PUFA (EPA 50.4mg) TID vs UDCA 23mg/kg day                             | 0 | Some concerns | Undetected | No concerns | No concerns    | Major concerns | No concerns | Moderate quality |
| Vitamin E 800 IU daily vs Volixibat 10mg daily                                | 0 | No concerns   | Undetected | No concerns | Major concerns | No concerns    | No concerns | High quality     |

|                                                                                     |                          |                          |                       |                     |                    |                      |                    |                          |
|-------------------------------------------------------------------------------------|--------------------------|--------------------------|-----------------------|---------------------|--------------------|----------------------|--------------------|--------------------------|
| Vitamin E 800 IU daily vs Volixibat 20mg daily                                      | 0                        | No concerns              | Undetected            | No concerns         | Major concerns     | No concerns          | No concerns        | High quality             |
| Vitamin E 800 IU daily vs Volixibat 5mg daily                                       | 0                        | No concerns              | Undetected            | No concerns         | No concerns        | Major concerns       | No concerns        | High quality             |
| omega 3 PUFA (EPA 50.4mg) TID vs Vitamin E 800 IU daily                             | 0                        | No concerns              | Undetected            | No concerns         | No concerns        | Major concerns       | No concerns        | High quality             |
| Vitamin E 800 IU daily and Pioglitazone 45mg daily vs Volixibat 10mg daily          | 0                        | No concerns              | Undetected            | No concerns         | Major concerns     | No concerns          | No concerns        | High quality             |
| Vitamin E 800 IU daily and Pioglitazone 45mg daily vs Volixibat 20mg daily          | 0                        | No concerns              | Undetected            | No concerns         | Major concerns     | No concerns          | No concerns        | High quality             |
| Vitamin E 800 IU daily and Pioglitazone 45mg daily vs Volixibat 5mg daily           | 0                        | No concerns              | Undetected            | No concerns         | No concerns        | Major concerns       | No concerns        | High quality             |
| omega 3 PUFA (EPA 50.4mg) TID vs Vitamin E 800 IU daily and Pioglitazone 45mg daily | 0                        | No concerns              | Undetected            | No concerns         | No concerns        | Major concerns       | No concerns        | High quality             |
| omega 3 PUFA (EPA 50.4mg) TID vs Volixibat 10mg daily                               | 0                        | No concerns              | Undetected            | No concerns         | Major concerns     | No concerns          | No concerns        | High quality             |
| omega 3 PUFA (EPA 50.4mg) TID vs Volixibat 20mg daily                               | 0                        | No concerns              | Undetected            | No concerns         | Major concerns     | No concerns          | No concerns        | High quality             |
| omega 3 PUFA (EPA 50.4mg) TID vs Volixibat 5mg daily                                | 0                        | No concerns              | Undetected            | No concerns         | Major concerns     | No concerns          | No concerns        | High quality             |
| <b><u>Mean change in hepatocellular ballooning score</u></b>                        |                          |                          |                       |                     |                    |                      |                    |                          |
| <b>Comparison</b>                                                                   | <b>Number of studies</b> | <b>Within-study bias</b> | <b>Reporting bias</b> | <b>Indirectness</b> | <b>Imprecision</b> | <b>Heterogeneity</b> | <b>Incoherence</b> | <b>Confidence rating</b> |
| Aldafermin 1mg SQ daily vs Placebo                                                  | 1                        | No concerns              | Undetected            | No concerns         | No concerns        | Major concerns       | No concerns        | High quality             |
| Belapectin 2mg/kg IV biweekly vs Belapectin 8mg/kg IV biweekly                      | 1                        | No concerns              | Suspected             | No concerns         | Major concerns     | No concerns          | No concerns        | Low quality              |
| Belapectin 2mg/kg IV biweekly vs Placebo                                            | 1                        | No concerns              | Suspected             | No concerns         | No concerns        | Major concerns       | No concerns        | Low quality              |
| Belapectin 8mg/kg IV biweekly vs Placebo                                            | 1                        | No concerns              | Suspected             | No concerns         | Major concerns     | No concerns          | No concerns        | Low quality              |
| Colesevelam 3.75g daily vs Placebo                                                  | 1                        | No concerns              | Undetected            | No concerns         | Major concerns     | No concerns          | No concerns        | High quality             |
| Liraglutide 1.8mg daily vs Placebo                                                  | 1                        | No concerns              | Suspected             | No concerns         | Major concerns     | No concerns          | No concerns        | Low quality              |
| Metformin 500mg daily vs Placebo                                                    | 1                        | Some concerns            | Suspected             | No concerns         | Major concerns     | No concerns          | No concerns        | Low quality              |
| Obeticholic acid 25mg daily vs Placebo                                              | 1                        | No concerns              | Undetected            | No concerns         | Major concerns     | No concerns          | No concerns        | High quality             |
| Pentoxifylline 400mg TID vs Pioglitazone 30mg daily                                 | 1                        | No concerns              | Undetected            | No concerns         | Major concerns     | No concerns          | No concerns        | High quality             |
| Pentoxifylline 400mg TID vs Placebo                                                 | 2                        | No concerns              | Suspected             | No concerns         | No concerns        | Major concerns       | No concerns        | Low quality              |
| Pioglitazone 30mg daily vs Placebo                                                  | 1                        | No concerns              | Undetected            | No concerns         | No concerns        | Major concerns       | No concerns        | High quality             |
| Pioglitazone 30mg daily vs Vitamin E 800 IU daily                                   | 1                        | No concerns              | Undetected            | No concerns         | Major concerns     | No concerns          | No concerns        | High quality             |
| Pioglitazone 45mg daily vs Placebo                                                  | 1                        | No concerns              | Undetected            | No concerns         | No concerns        | Major concerns       | No concerns        | High quality             |
| Placebo vs Rosiglitazone 8mg daily                                                  | 1                        | No concerns              | Undetected            | No concerns         | Major concerns     | No concerns          | No concerns        | High quality             |
| Placebo vs Sitagliptin 100mg daily                                                  | 2                        | Some concerns            | Undetected            | No concerns         | No concerns        | Major concerns       | No concerns        | Moderate quality         |
| Placebo vs UDCA 23mg/kg day                                                         | 1                        | Some concerns            | Suspected             | No concerns         | Major concerns     | No concerns          | No concerns        | Low quality              |
| Placebo vs Vitamin E 800 IU daily                                                   | 2                        | No concerns              | Undetected            | No concerns         | No concerns        | Major concerns       | No concerns        | High quality             |

|                                                                                        |   |                |            |             |                |                |             |                  |
|----------------------------------------------------------------------------------------|---|----------------|------------|-------------|----------------|----------------|-------------|------------------|
| Placebo vs Vitamin E 800 IU daily and Pioglitazone 45mg daily                          | 1 | No concerns    | Undetected | No concerns | No concerns    | Major concerns | No concerns | High quality     |
| Placebo vs Volixibat 10mg daily                                                        | 1 | No concerns    | Undetected | No concerns | Major concerns | No concerns    | No concerns | High quality     |
| Placebo vs Volixibat 20mg daily                                                        | 1 | No concerns    | Undetected | No concerns | Major concerns | No concerns    | No concerns | High quality     |
| Placebo vs Volixibat 5mg daily                                                         | 1 | No concerns    | Undetected | No concerns | Major concerns | No concerns    | No concerns | High quality     |
| omega 3 PUFA (EPA 50.4mg) TID vs Placebo                                               | 1 | No concerns    | Suspected  | No concerns | Major concerns | No concerns    | No concerns | Low quality      |
| Rosiglitazone 8mg and Losartan 50mg daily vs Rosiglitazone 8mg and Metformin 500mg BID | 1 | Major concerns | Undetected | No concerns | Major concerns | No concerns    | No concerns | Low quality      |
| Rosiglitazone 8mg and Losartan 50mg daily vs Rosiglitazone 8mg daily                   | 1 | Major concerns | Undetected | No concerns | Major concerns | No concerns    | No concerns | Low quality      |
| Rosiglitazone 8mg and Metformin 500mg BID vs Rosiglitazone 8mg daily                   | 1 | Major concerns | Undetected | No concerns | Major concerns | No concerns    | No concerns | Low quality      |
| Telmisartan 40mg daily vs Vitamin E 800 IU daily                                       | 1 | Major concerns | Undetected | No concerns | Major concerns | No concerns    | No concerns | Low quality      |
| Vitamin E 800 IU daily vs Vitamin E 800 IU daily and Pioglitazone 45mg daily           | 1 | No concerns    | Undetected | No concerns | Major concerns | No concerns    | No concerns | High quality     |
| Volixibat 10mg daily vs Volixibat 20mg daily                                           | 1 | No concerns    | Undetected | No concerns | Major concerns | No concerns    | No concerns | High quality     |
| Volixibat 10mg daily vs Volixibat 5mg daily                                            | 1 | No concerns    | Undetected | No concerns | Major concerns | No concerns    | No concerns | High quality     |
| Volixibat 20mg daily vs Volixibat 5mg daily                                            | 1 | No concerns    | Undetected | No concerns | Major concerns | No concerns    | No concerns | High quality     |
| Aldafermin 1mg SQ daily vs Belapectin 2mg/kg IV biweekly                               | 0 | No concerns    | Undetected | No concerns | Major concerns | No concerns    | No concerns | High quality     |
| Aldafermin 1mg SQ daily vs Belapectin 8mg/kg IV biweekly                               | 0 | No concerns    | Undetected | No concerns | Major concerns | No concerns    | No concerns | High quality     |
| Aldafermin 1mg SQ daily vs Colesevelam 3.75g daily                                     | 0 | No concerns    | Undetected | No concerns | Major concerns | No concerns    | No concerns | High quality     |
| Aldafermin 1mg SQ daily vs Liraglutide 1.8mg daily                                     | 0 | No concerns    | Undetected | No concerns | Major concerns | No concerns    | No concerns | High quality     |
| Aldafermin 1mg SQ daily vs Metformin 500mg daily                                       | 0 | Some concerns  | Undetected | No concerns | Major concerns | No concerns    | No concerns | Moderate quality |
| Aldafermin 1mg SQ daily vs Obeticholic acid 25mg daily                                 | 0 | No concerns    | Undetected | No concerns | Major concerns | No concerns    | No concerns | High quality     |
| Aldafermin 1mg SQ daily vs Pentoxifylline 400mg TID                                    | 0 | No concerns    | Undetected | No concerns | Major concerns | No concerns    | No concerns | High quality     |
| Aldafermin 1mg SQ daily vs Pioglitazone 30mg daily                                     | 0 | No concerns    | Undetected | No concerns | Major concerns | No concerns    | No concerns | High quality     |
| Aldafermin 1mg SQ daily vs Pioglitazone 45mg daily                                     | 0 | No concerns    | Undetected | No concerns | Major concerns | No concerns    | No concerns | High quality     |
| Aldafermin 1mg SQ daily vs Rosiglitazone 8mg and Losartan 50mg daily                   | 0 | Some concerns  | Undetected | No concerns | Major concerns | No concerns    | No concerns | Moderate quality |
| Aldafermin 1mg SQ daily vs Rosiglitazone 8mg and Metformin 500mg BID                   | 0 | Some concerns  | Undetected | No concerns | Major concerns | No concerns    | No concerns | Moderate quality |
| Aldafermin 1mg SQ daily vs Rosiglitazone 8mg daily                                     | 0 | No concerns    | Undetected | No concerns | Major concerns | No concerns    | No concerns | High quality     |
| Aldafermin 1mg SQ daily vs Sitagliptin 100mg daily                                     | 0 | Some concerns  | Undetected | No concerns | Major concerns | No concerns    | No concerns | Moderate quality |

|                                                                                     |   |               |            |             |                |                |             |                  |
|-------------------------------------------------------------------------------------|---|---------------|------------|-------------|----------------|----------------|-------------|------------------|
| Aldafermin 1mg SQ daily vs Telmisartan 40mg daily                                   | 0 | Some concerns | Undetected | No concerns | Major concerns | No concerns    | No concerns | Moderate quality |
| Aldafermin 1mg SQ daily vs UDCA 23mg/kg day                                         | 0 | Some concerns | Undetected | No concerns | No concerns    | Major concerns | No concerns | Moderate quality |
| Aldafermin 1mg SQ daily vs Vitamin E 800 IU daily                                   | 0 | No concerns   | Undetected | No concerns | Major concerns | No concerns    | No concerns | High quality     |
| Aldafermin 1mg SQ daily vs Vitamin E 800 IU daily and Pioglitazone 45mg daily       | 0 | No concerns   | Undetected | No concerns | Major concerns | No concerns    | No concerns | High quality     |
| Aldafermin 1mg SQ daily vs Volixibat 10mg daily                                     | 0 | No concerns   | Undetected | No concerns | No concerns    | Major concerns | No concerns | High quality     |
| Aldafermin 1mg SQ daily vs Volixibat 20mg daily                                     | 0 | No concerns   | Undetected | No concerns | No concerns    | Major concerns | No concerns | High quality     |
| Aldafermin 1mg SQ daily vs Volixibat 5mg daily                                      | 0 | No concerns   | Undetected | No concerns | No concerns    | Major concerns | No concerns | High quality     |
| Aldafermin 1mg SQ daily vs omega 3 PUFA (EPA 50.4mg) TID                            | 0 | No concerns   | Undetected | No concerns | No concerns    | Major concerns | No concerns | High quality     |
| Belapectin 2mg/kg IV biweekly vs Colesevelam 3.75g daily                            | 0 | No concerns   | Undetected | No concerns | Major concerns | No concerns    | No concerns | High quality     |
| Belapectin 2mg/kg IV biweekly vs Liraglutide 1.8mg daily                            | 0 | No concerns   | Undetected | No concerns | Major concerns | No concerns    | No concerns | High quality     |
| Belapectin 2mg/kg IV biweekly vs Metformin 500mg daily                              | 0 | No concerns   | Undetected | No concerns | Major concerns | No concerns    | No concerns | High quality     |
| Belapectin 2mg/kg IV biweekly vs Obeticholic acid 25mg daily                        | 0 | No concerns   | Undetected | No concerns | Major concerns | No concerns    | No concerns | High quality     |
| Belapectin 2mg/kg IV biweekly vs Pentoxifylline 400mg TID                           | 0 | No concerns   | Undetected | No concerns | Major concerns | No concerns    | No concerns | High quality     |
| Belapectin 2mg/kg IV biweekly vs Pioglitazone 30mg daily                            | 0 | No concerns   | Undetected | No concerns | Major concerns | No concerns    | No concerns | High quality     |
| Belapectin 2mg/kg IV biweekly vs Pioglitazone 45mg daily                            | 0 | No concerns   | Undetected | No concerns | Major concerns | No concerns    | No concerns | High quality     |
| Belapectin 2mg/kg IV biweekly vs Rosiglitazone 8mg and Losartan 50mg daily          | 0 | Some concerns | Undetected | No concerns | Major concerns | No concerns    | No concerns | Moderate quality |
| Belapectin 2mg/kg IV biweekly vs Rosiglitazone 8mg and Metformin 500mg BID          | 0 | Some concerns | Undetected | No concerns | Major concerns | No concerns    | No concerns | Moderate quality |
| Belapectin 2mg/kg IV biweekly vs Rosiglitazone 8mg daily                            | 0 | No concerns   | Undetected | No concerns | Major concerns | No concerns    | No concerns | High quality     |
| Belapectin 2mg/kg IV biweekly vs Sitagliptin 100mg daily                            | 0 | Some concerns | Undetected | No concerns | Major concerns | No concerns    | No concerns | Moderate quality |
| Belapectin 2mg/kg IV biweekly vs Telmisartan 40mg daily                             | 0 | Some concerns | Undetected | No concerns | Major concerns | No concerns    | No concerns | Moderate quality |
| Belapectin 2mg/kg IV biweekly vs UDCA 23mg/kg day                                   | 0 | No concerns   | Undetected | No concerns | No concerns    | Major concerns | No concerns | High quality     |
| Belapectin 2mg/kg IV biweekly vs Vitamin E 800 IU daily                             | 0 | No concerns   | Undetected | No concerns | Major concerns | No concerns    | No concerns | High quality     |
| Belapectin 2mg/kg IV biweekly vs Vitamin E 800 IU daily and Pioglitazone 45mg daily | 0 | No concerns   | Undetected | No concerns | Major concerns | No concerns    | No concerns | High quality     |
| Belapectin 2mg/kg IV biweekly vs Volixibat 10mg daily                               | 0 | No concerns   | Undetected | No concerns | No concerns    | Major concerns | No concerns | High quality     |



|                                                                                     |   |               |            |             |                |                |             |                  |
|-------------------------------------------------------------------------------------|---|---------------|------------|-------------|----------------|----------------|-------------|------------------|
| Belapectin 2mg/kg IV biweekly vs Volixibat 20mg daily                               | 0 | No concerns   | Undetected | No concerns | No concerns    | Major concerns | No concerns | High quality     |
| Belapectin 2mg/kg IV biweekly vs Volixibat 5mg daily                                | 0 | No concerns   | Undetected | No concerns | No concerns    | Major concerns | No concerns | High quality     |
| Belapectin 2mg/kg IV biweekly vs omega 3 PUFA (EPA 50.4mg) TID                      | 0 | No concerns   | Undetected | No concerns | Major concerns | No concerns    | No concerns | High quality     |
| Belapectin 8mg/kg IV biweekly vs Colesevelam 3.75g daily                            | 0 | No concerns   | Undetected | No concerns | Major concerns | No concerns    | No concerns | High quality     |
| Belapectin 8mg/kg IV biweekly vs Liraglutide 1.8mg daily                            | 0 | No concerns   | Undetected | No concerns | Major concerns | No concerns    | No concerns | High quality     |
| Belapectin 8mg/kg IV biweekly vs Metformin 500mg daily                              | 0 | No concerns   | Undetected | No concerns | Major concerns | No concerns    | No concerns | High quality     |
| Belapectin 8mg/kg IV biweekly vs Obeticholic acid 25mg daily                        | 0 | No concerns   | Undetected | No concerns | Major concerns | No concerns    | No concerns | High quality     |
| Belapectin 8mg/kg IV biweekly vs Pentoxifylline 400mg TID                           | 0 | No concerns   | Undetected | No concerns | Major concerns | No concerns    | No concerns | High quality     |
| Belapectin 8mg/kg IV biweekly vs Pioglitazone 30mg daily                            | 0 | No concerns   | Undetected | No concerns | Major concerns | No concerns    | No concerns | High quality     |
| Belapectin 8mg/kg IV biweekly vs Pioglitazone 45mg daily                            | 0 | No concerns   | Undetected | No concerns | Major concerns | No concerns    | No concerns | High quality     |
| Belapectin 8mg/kg IV biweekly vs Rosiglitazone 8mg and Losartan 50mg daily          | 0 | Some concerns | Undetected | No concerns | Major concerns | No concerns    | No concerns | Moderate quality |
| Belapectin 8mg/kg IV biweekly vs Rosiglitazone 8mg and Metformin 500mg BID          | 0 | Some concerns | Undetected | No concerns | Major concerns | No concerns    | No concerns | Moderate quality |
| Belapectin 8mg/kg IV biweekly vs Rosiglitazone 8mg daily                            | 0 | No concerns   | Undetected | No concerns | Major concerns | No concerns    | No concerns | High quality     |
| Belapectin 8mg/kg IV biweekly vs Sitagliptin 100mg daily                            | 0 | Some concerns | Undetected | No concerns | Major concerns | No concerns    | No concerns | Moderate quality |
| Belapectin 8mg/kg IV biweekly vs Telmisartan 40mg daily                             | 0 | Some concerns | Undetected | No concerns | Major concerns | No concerns    | No concerns | Moderate quality |
| Belapectin 8mg/kg IV biweekly vs UDCA 23mg/kg day                                   | 0 | No concerns   | Undetected | No concerns | Major concerns | No concerns    | No concerns | High quality     |
| Belapectin 8mg/kg IV biweekly vs Vitamin E 800 IU daily                             | 0 | No concerns   | Undetected | No concerns | Major concerns | No concerns    | No concerns | High quality     |
| Belapectin 8mg/kg IV biweekly vs Vitamin E 800 IU daily and Pioglitazone 45mg daily | 0 | No concerns   | Undetected | No concerns | Major concerns | No concerns    | No concerns | High quality     |
| Belapectin 8mg/kg IV biweekly vs Volixibat 10mg daily                               | 0 | No concerns   | Undetected | No concerns | Major concerns | No concerns    | No concerns | High quality     |
| Belapectin 8mg/kg IV biweekly vs Volixibat 20mg daily                               | 0 | No concerns   | Undetected | No concerns | No concerns    | Major concerns | No concerns | High quality     |
| Belapectin 8mg/kg IV biweekly vs Volixibat 5mg daily                                | 0 | No concerns   | Undetected | No concerns | Major concerns | No concerns    | No concerns | High quality     |
| Belapectin 8mg/kg IV biweekly vs omega 3 PUFA (EPA 50.4mg) TID                      | 0 | No concerns   | Undetected | No concerns | Major concerns | No concerns    | No concerns | High quality     |
| Colesevelam 3.75g daily vs Liraglutide 1.8mg daily                                  | 0 | No concerns   | Undetected | No concerns | Major concerns | No concerns    | No concerns | High quality     |
| Colesevelam 3.75g daily vs Metformin 500mg daily                                    | 0 | Some concerns | Undetected | No concerns | Major concerns | No concerns    | No concerns | Moderate quality |
| Colesevelam 3.75g daily vs Obeticholic acid 25mg daily                              | 0 | No concerns   | Undetected | No concerns | Major concerns | No concerns    | No concerns | High quality     |



|                                                                               |   |               |            |             |                |             |             |                  |
|-------------------------------------------------------------------------------|---|---------------|------------|-------------|----------------|-------------|-------------|------------------|
| Colesevelam 3.75g daily vs Pentoxifylline 400mg TID                           | 0 | No concerns   | Undetected | No concerns | Major concerns | No concerns | No concerns | High quality     |
| Colesevelam 3.75g daily vs Pioglitazone 30mg daily                            | 0 | No concerns   | Undetected | No concerns | Major concerns | No concerns | No concerns | High quality     |
| Colesevelam 3.75g daily vs Pioglitazone 45mg daily                            | 0 | No concerns   | Undetected | No concerns | Major concerns | No concerns | No concerns | High quality     |
| Colesevelam 3.75g daily vs Rosiglitazone 8mg and Losartan 50mg daily          | 0 | Some concerns | Undetected | No concerns | Major concerns | No concerns | No concerns | Moderate quality |
| Colesevelam 3.75g daily vs Rosiglitazone 8mg and Metformin 500mg BID          | 0 | Some concerns | Undetected | No concerns | Major concerns | No concerns | No concerns | Moderate quality |
| Colesevelam 3.75g daily vs Rosiglitazone 8mg daily                            | 0 | No concerns   | Undetected | No concerns | Major concerns | No concerns | No concerns | High quality     |
| Colesevelam 3.75g daily vs Sitagliptin 100mg daily                            | 0 | Some concerns | Undetected | No concerns | Major concerns | No concerns | No concerns | Moderate quality |
| Colesevelam 3.75g daily vs Telmisartan 40mg daily                             | 0 | Some concerns | Undetected | No concerns | Major concerns | No concerns | No concerns | Moderate quality |
| Colesevelam 3.75g daily vs UDCA 23mg/kg day                                   | 0 | Some concerns | Undetected | No concerns | Major concerns | No concerns | No concerns | Moderate quality |
| Colesevelam 3.75g daily vs Vitamin E 800 IU daily                             | 0 | No concerns   | Undetected | No concerns | Major concerns | No concerns | No concerns | High quality     |
| Colesevelam 3.75g daily vs Vitamin E 800 IU daily and Pioglitazone 45mg daily | 0 | No concerns   | Undetected | No concerns | Major concerns | No concerns | No concerns | High quality     |
| Colesevelam 3.75g daily vs Volixibat 10mg daily                               | 0 | No concerns   | Undetected | No concerns | Major concerns | No concerns | No concerns | High quality     |
| Colesevelam 3.75g daily vs Volixibat 20mg daily                               | 0 | No concerns   | Undetected | No concerns | Major concerns | No concerns | No concerns | High quality     |
| Colesevelam 3.75g daily vs Volixibat 5mg daily                                | 0 | No concerns   | Undetected | No concerns | Major concerns | No concerns | No concerns | High quality     |
| Colesevelam 3.75g daily vs omega 3 PUFA (EPA 50.4mg) TID                      | 0 | No concerns   | Undetected | No concerns | Major concerns | No concerns | No concerns | High quality     |
| Liraglutide 1.8mg daily vs Metformin 500mg daily                              | 0 | Some concerns | Undetected | No concerns | Major concerns | No concerns | No concerns | Moderate quality |
| Liraglutide 1.8mg daily vs Obeticholic acid 25mg daily                        | 0 | No concerns   | Undetected | No concerns | Major concerns | No concerns | No concerns | High quality     |
| Liraglutide 1.8mg daily vs Pentoxifylline 400mg TID                           | 0 | No concerns   | Undetected | No concerns | Major concerns | No concerns | No concerns | High quality     |
| Liraglutide 1.8mg daily vs Pioglitazone 30mg daily                            | 0 | No concerns   | Undetected | No concerns | Major concerns | No concerns | No concerns | High quality     |
| Liraglutide 1.8mg daily vs Pioglitazone 45mg daily                            | 0 | No concerns   | Undetected | No concerns | Major concerns | No concerns | No concerns | High quality     |
| Liraglutide 1.8mg daily vs Rosiglitazone 8mg and Losartan 50mg daily          | 0 | Some concerns | Undetected | No concerns | Major concerns | No concerns | No concerns | Moderate quality |
| Liraglutide 1.8mg daily vs Rosiglitazone 8mg and Metformin 500mg BID          | 0 | Some concerns | Undetected | No concerns | Major concerns | No concerns | No concerns | Moderate quality |
| Liraglutide 1.8mg daily vs Rosiglitazone 8mg daily                            | 0 | No concerns   | Undetected | No concerns | Major concerns | No concerns | No concerns | High quality     |
| Liraglutide 1.8mg daily vs Sitagliptin 100mg daily                            | 0 | Some concerns | Undetected | No concerns | Major concerns | No concerns | No concerns | Moderate quality |
| Liraglutide 1.8mg daily vs Telmisartan 40mg daily                             | 0 | Some concerns | Undetected | No concerns | Major concerns | No concerns | No concerns | Moderate quality |

|                                                                               |   |               |            |             |                |                |             |                  |
|-------------------------------------------------------------------------------|---|---------------|------------|-------------|----------------|----------------|-------------|------------------|
| Liraglutide 1.8mg daily vs UDCA 23mg/kg day                                   | 0 | Some concerns | Undetected | No concerns | Major concerns | No concerns    | No concerns | Moderate quality |
| Liraglutide 1.8mg daily vs Vitamin E 800 IU daily                             | 0 | No concerns   | Undetected | No concerns | Major concerns | No concerns    | No concerns | High quality     |
| Liraglutide 1.8mg daily vs Vitamin E 800 IU daily and Pioglitazone 45mg daily | 0 | No concerns   | Undetected | No concerns | Major concerns | No concerns    | No concerns | High quality     |
| Liraglutide 1.8mg daily vs Volixibat 10mg daily                               | 0 | No concerns   | Undetected | No concerns | Major concerns | No concerns    | No concerns | High quality     |
| Liraglutide 1.8mg daily vs Volixibat 20mg daily                               | 0 | No concerns   | Undetected | No concerns | No concerns    | Major concerns | No concerns | High quality     |
| Liraglutide 1.8mg daily vs Volixibat 5mg daily                                | 0 | No concerns   | Undetected | No concerns | Major concerns | No concerns    | No concerns | High quality     |
| Liraglutide 1.8mg daily vs omega 3 PUFA (EPA 50.4mg) TID                      | 0 | No concerns   | Undetected | No concerns | Major concerns | No concerns    | No concerns | High quality     |
| Metformin 500mg daily vs Obeticholic acid 25mg daily                          | 0 | Some concerns | Undetected | No concerns | Major concerns | No concerns    | No concerns | Moderate quality |
| Metformin 500mg daily vs Pentoxifylline 400mg TID                             | 0 | Some concerns | Undetected | No concerns | Major concerns | No concerns    | No concerns | Moderate quality |
| Metformin 500mg daily vs Pioglitazone 30mg daily                              | 0 | Some concerns | Undetected | No concerns | Major concerns | No concerns    | No concerns | Moderate quality |
| Metformin 500mg daily vs Pioglitazone 45mg daily                              | 0 | Some concerns | Undetected | No concerns | Major concerns | No concerns    | No concerns | Moderate quality |
| Metformin 500mg daily vs Rosiglitazone 8mg and Losartan 50mg daily            | 0 | Some concerns | Undetected | No concerns | Major concerns | No concerns    | No concerns | Moderate quality |
| Metformin 500mg daily vs Rosiglitazone 8mg and Metformin 500mg BID            | 0 | Some concerns | Undetected | No concerns | Major concerns | No concerns    | No concerns | Moderate quality |
| Metformin 500mg daily vs Rosiglitazone 8mg daily                              | 0 | Some concerns | Undetected | No concerns | Major concerns | No concerns    | No concerns | Moderate quality |
| Metformin 500mg daily vs Sitagliptin 100mg daily                              | 0 | Some concerns | Undetected | No concerns | Major concerns | No concerns    | No concerns | Moderate quality |
| Metformin 500mg daily vs Telmisartan 40mg daily                               | 0 | Some concerns | Undetected | No concerns | Major concerns | No concerns    | No concerns | Moderate quality |
| Metformin 500mg daily vs UDCA 23mg/kg day                                     | 0 | Some concerns | Undetected | No concerns | Major concerns | No concerns    | No concerns | Moderate quality |
| Metformin 500mg daily vs Vitamin E 800 IU daily                               | 0 | No concerns   | Undetected | No concerns | Major concerns | No concerns    | No concerns | High quality     |
| Metformin 500mg daily vs Vitamin E 800 IU daily and Pioglitazone 45mg daily   | 0 | No concerns   | Undetected | No concerns | Major concerns | No concerns    | No concerns | High quality     |
| Metformin 500mg daily vs Volixibat 10mg daily                                 | 0 | No concerns   | Undetected | No concerns | Major concerns | No concerns    | No concerns | High quality     |
| Metformin 500mg daily vs Volixibat 20mg daily                                 | 0 | No concerns   | Undetected | No concerns | Major concerns | No concerns    | No concerns | High quality     |
| Metformin 500mg daily vs Volixibat 5mg daily                                  | 0 | No concerns   | Undetected | No concerns | Major concerns | No concerns    | No concerns | High quality     |
| Metformin 500mg daily vs omega 3 PUFA (EPA 50.4mg) TID                        | 0 | Some concerns | Undetected | No concerns | Major concerns | No concerns    | No concerns | Moderate quality |
| Obeticholic acid 25mg daily vs Pentoxifylline 400mg TID                       | 0 | No concerns   | Undetected | No concerns | Major concerns | No concerns    | No concerns | High quality     |

|                                                                                   |   |               |            |             |                |                |             |                  |
|-----------------------------------------------------------------------------------|---|---------------|------------|-------------|----------------|----------------|-------------|------------------|
| Obeticholic acid 25mg daily vs Pioglitazone 30mg daily                            | 0 | No concerns   | Undetected | No concerns | Major concerns | No concerns    | No concerns | High quality     |
| Obeticholic acid 25mg daily vs Pioglitazone 45mg daily                            | 0 | No concerns   | Undetected | No concerns | Major concerns | No concerns    | No concerns | High quality     |
| Obeticholic acid 25mg daily vs Rosiglitazone 8mg and Losartan 50mg daily          | 0 | Some concerns | Undetected | No concerns | Major concerns | No concerns    | No concerns | Moderate quality |
| Obeticholic acid 25mg daily vs Rosiglitazone 8mg and Metformin 500mg BID          | 0 | Some concerns | Undetected | No concerns | Major concerns | No concerns    | No concerns | Moderate quality |
| Obeticholic acid 25mg daily vs Rosiglitazone 8mg daily                            | 0 | No concerns   | Undetected | No concerns | Major concerns | No concerns    | No concerns | High quality     |
| Obeticholic acid 25mg daily vs Sitagliptin 100mg daily                            | 0 | Some concerns | Undetected | No concerns | Major concerns | No concerns    | No concerns | Moderate quality |
| Obeticholic acid 25mg daily vs Telmisartan 40mg daily                             | 0 | Some concerns | Undetected | No concerns | Major concerns | No concerns    | No concerns | Moderate quality |
| Obeticholic acid 25mg daily vs UDCA 23mg/kg day                                   | 0 | Some concerns | Undetected | No concerns | Major concerns | No concerns    | No concerns | Moderate quality |
| Obeticholic acid 25mg daily vs Vitamin E 800 IU daily                             | 0 | No concerns   | Undetected | No concerns | Major concerns | No concerns    | No concerns | High quality     |
| Obeticholic acid 25mg daily vs Vitamin E 800 IU daily and Pioglitazone 45mg daily | 0 | No concerns   | Undetected | No concerns | Major concerns | No concerns    | No concerns | High quality     |
| Obeticholic acid 25mg daily vs Volixibat 10mg daily                               | 0 | No concerns   | Undetected | No concerns | No concerns    | Major concerns | No concerns | High quality     |
| Obeticholic acid 25mg daily vs Volixibat 20mg daily                               | 0 | No concerns   | Undetected | No concerns | No concerns    | Major concerns | No concerns | High quality     |
| Obeticholic acid 25mg daily vs Volixibat 5mg daily                                | 0 | No concerns   | Undetected | No concerns | Major concerns | No concerns    | No concerns | High quality     |
| Obeticholic acid 25mg daily vs omega 3 PUFA (EPA 50.4mg) TID                      | 0 | No concerns   | Undetected | No concerns | Major concerns | No concerns    | No concerns | High quality     |
| Pentoxifylline 400mg TID vs Pioglitazone 45mg daily                               | 0 | No concerns   | Undetected | No concerns | Major concerns | No concerns    | No concerns | High quality     |
| Pentoxifylline 400mg TID vs Rosiglitazone 8mg and Losartan 50mg daily             | 0 | Some concerns | Undetected | No concerns | Major concerns | No concerns    | No concerns | Moderate quality |
| Pentoxifylline 400mg TID vs Rosiglitazone 8mg and Metformin 500mg BID             | 0 | Some concerns | Undetected | No concerns | Major concerns | No concerns    | No concerns | Moderate quality |
| Pentoxifylline 400mg TID vs Rosiglitazone 8mg daily                               | 0 | No concerns   | Undetected | No concerns | Major concerns | No concerns    | No concerns | High quality     |
| Pentoxifylline 400mg TID vs Sitagliptin 100mg daily                               | 0 | Some concerns | Undetected | No concerns | Major concerns | No concerns    | No concerns | Moderate quality |
| Pentoxifylline 400mg TID vs Telmisartan 40mg daily                                | 0 | Some concerns | Undetected | No concerns | Major concerns | No concerns    | No concerns | Moderate quality |
| Pentoxifylline 400mg TID vs UDCA 23mg/kg day                                      | 0 | Some concerns | Undetected | No concerns | No concerns    | Major concerns | No concerns | Moderate quality |
| Pentoxifylline 400mg TID vs Vitamin E 800 IU daily                                | 0 | No concerns   | Undetected | No concerns | Major concerns | No concerns    | No concerns | High quality     |
| Pentoxifylline 400mg TID vs Vitamin E 800 IU daily and Pioglitazone 45mg daily    | 0 | No concerns   | Undetected | No concerns | Major concerns | No concerns    | No concerns | High quality     |

|                                                                               |   |               |            |             |                |                |             |                  |
|-------------------------------------------------------------------------------|---|---------------|------------|-------------|----------------|----------------|-------------|------------------|
| Pentoxifylline 400mg TID vs Volixibat 10mg daily                              | 0 | No concerns   | Undetected | No concerns | No concerns    | Major concerns | No concerns | High quality     |
| Pentoxifylline 400mg TID vs Volixibat 20mg daily                              | 0 | No concerns   | Undetected | No concerns | No concerns    | Major concerns | No concerns | High quality     |
| Pentoxifylline 400mg TID vs Volixibat 5mg daily                               | 0 | No concerns   | Undetected | No concerns | Major concerns | No concerns    | No concerns | High quality     |
| omega 3 PUFA (EPA 50.4mg) TID vs Pentoxifylline 400mg TID                     | 0 | No concerns   | Undetected | No concerns | Major concerns | No concerns    | No concerns | High quality     |
| Pioglitazone 30mg daily vs Pioglitazone 45mg daily                            | 0 | No concerns   | Undetected | No concerns | Major concerns | No concerns    | No concerns | High quality     |
| Pioglitazone 30mg daily vs Rosiglitazone 8mg and Losartan 50mg daily          | 0 | Some concerns | Undetected | No concerns | Major concerns | No concerns    | No concerns | Moderate quality |
| Pioglitazone 30mg daily vs Rosiglitazone 8mg and Metformin 500mg BID          | 0 | Some concerns | Undetected | No concerns | Major concerns | No concerns    | No concerns | Moderate quality |
| Pioglitazone 30mg daily vs Rosiglitazone 8mg daily                            | 0 | No concerns   | Undetected | No concerns | Major concerns | No concerns    | No concerns | High quality     |
| Pioglitazone 30mg daily vs Sitagliptin 100mg daily                            | 0 | Some concerns | Undetected | No concerns | Major concerns | No concerns    | No concerns | Moderate quality |
| Pioglitazone 30mg daily vs Telmisartan 40mg daily                             | 0 | Some concerns | Undetected | No concerns | Major concerns | No concerns    | No concerns | Moderate quality |
| Pioglitazone 30mg daily vs UDCA 23mg/kg day                                   | 0 | Some concerns | Undetected | No concerns | Major concerns | No concerns    | No concerns | Moderate quality |
| Pioglitazone 30mg daily vs Vitamin E 800 IU daily and Pioglitazone 45mg daily | 0 | No concerns   | Undetected | No concerns | Major concerns | No concerns    | No concerns | High quality     |
| Pioglitazone 30mg daily vs Volixibat 10mg daily                               | 0 | No concerns   | Undetected | No concerns | No concerns    | Major concerns | No concerns | High quality     |
| Pioglitazone 30mg daily vs Volixibat 20mg daily                               | 0 | No concerns   | Undetected | No concerns | No concerns    | Major concerns | No concerns | High quality     |
| Pioglitazone 30mg daily vs Volixibat 5mg daily                                | 0 | No concerns   | Undetected | No concerns | Major concerns | No concerns    | No concerns | High quality     |
| omega 3 PUFA (EPA 50.4mg) TID vs Pioglitazone 30mg daily                      | 0 | No concerns   | Undetected | No concerns | Major concerns | No concerns    | No concerns | High quality     |
| Pioglitazone 45mg daily vs Rosiglitazone 8mg and Losartan 50mg daily          | 0 | Some concerns | Undetected | No concerns | Major concerns | No concerns    | No concerns | Moderate quality |
| Pioglitazone 45mg daily vs Rosiglitazone 8mg and Metformin 500mg BID          | 0 | Some concerns | Undetected | No concerns | Major concerns | No concerns    | No concerns | Moderate quality |
| Pioglitazone 45mg daily vs Rosiglitazone 8mg daily                            | 0 | No concerns   | Undetected | No concerns | Major concerns | No concerns    | No concerns | High quality     |
| Pioglitazone 45mg daily vs Sitagliptin 100mg daily                            | 0 | Some concerns | Undetected | No concerns | Major concerns | No concerns    | No concerns | Moderate quality |
| Pioglitazone 45mg daily vs Telmisartan 40mg daily                             | 0 | Some concerns | Undetected | No concerns | Major concerns | No concerns    | No concerns | Moderate quality |
| Pioglitazone 45mg daily vs UDCA 23mg/kg day                                   | 0 | Some concerns | Undetected | No concerns | No concerns    | Major concerns | No concerns | Moderate quality |
| Pioglitazone 45mg daily vs Vitamin E 800 IU daily                             | 0 | No concerns   | Undetected | No concerns | Major concerns | No concerns    | No concerns | High quality     |



|                                                                               |   |               |            |             |                |                |             |                  |
|-------------------------------------------------------------------------------|---|---------------|------------|-------------|----------------|----------------|-------------|------------------|
| omega 3 PUFA (EPA 50.4mg) TID vs Rosiglitazone 8mg and Metformin 500mg BID    | 0 | Some concerns | Undetected | No concerns | Major concerns | No concerns    | No concerns | Moderate quality |
| Rosiglitazone 8mg daily vs Sitagliptin 100mg daily                            | 0 | Some concerns | Undetected | No concerns | Major concerns | No concerns    | No concerns | Moderate quality |
| Rosiglitazone 8mg daily vs Telmisartan 40mg daily                             | 0 | Some concerns | Undetected | No concerns | Major concerns | No concerns    | No concerns | Moderate quality |
| Rosiglitazone 8mg daily vs UDCA 23mg/kg day                                   | 0 | Some concerns | Undetected | No concerns | Major concerns | No concerns    | No concerns | Moderate quality |
| Rosiglitazone 8mg daily vs Vitamin E 800 IU daily                             | 0 | No concerns   | Undetected | No concerns | Major concerns | No concerns    | No concerns | High quality     |
| Rosiglitazone 8mg daily vs Vitamin E 800 IU daily and Pioglitazone 45mg daily | 0 | No concerns   | Undetected | No concerns | Major concerns | No concerns    | No concerns | High quality     |
| Rosiglitazone 8mg daily vs Volixibat 10mg daily                               | 0 | No concerns   | Undetected | No concerns | Major concerns | No concerns    | No concerns | High quality     |
| Rosiglitazone 8mg daily vs Volixibat 20mg daily                               | 0 | No concerns   | Undetected | No concerns | Major concerns | No concerns    | No concerns | High quality     |
| Rosiglitazone 8mg daily vs Volixibat 5mg daily                                | 0 | No concerns   | Undetected | No concerns | Major concerns | No concerns    | No concerns | High quality     |
| omega 3 PUFA (EPA 50.4mg) TID vs Rosiglitazone 8mg daily                      | 0 | No concerns   | Undetected | No concerns | Major concerns | No concerns    | No concerns | High quality     |
| Sitagliptin 100mg daily vs Telmisartan 40mg daily                             | 0 | Some concerns | Undetected | No concerns | Major concerns | No concerns    | No concerns | Moderate quality |
| Sitagliptin 100mg daily vs UDCA 23mg/kg day                                   | 0 | Some concerns | Undetected | No concerns | No concerns    | Major concerns | No concerns | Moderate quality |
| Sitagliptin 100mg daily vs Vitamin E 800 IU daily                             | 0 | Some concerns | Undetected | No concerns | Major concerns | No concerns    | No concerns | Moderate quality |
| Sitagliptin 100mg daily vs Vitamin E 800 IU daily and Pioglitazone 45mg daily | 0 | Some concerns | Undetected | No concerns | Major concerns | No concerns    | No concerns | Moderate quality |
| Sitagliptin 100mg daily vs Volixibat 10mg daily                               | 0 | Some concerns | Undetected | No concerns | No concerns    | Major concerns | No concerns | Moderate quality |
| Sitagliptin 100mg daily vs Volixibat 20mg daily                               | 0 | Some concerns | Undetected | No concerns | No concerns    | Major concerns | No concerns | Moderate quality |
| Sitagliptin 100mg daily vs Volixibat 5mg daily                                | 0 | Some concerns | Undetected | No concerns | Major concerns | No concerns    | No concerns | Moderate quality |
| omega 3 PUFA (EPA 50.4mg) TID vs Sitagliptin 100mg daily                      | 0 | Some concerns | Undetected | No concerns | Major concerns | No concerns    | No concerns | Moderate quality |
| Telmisartan 40mg daily vs UDCA 23mg/kg day                                    | 0 | Some concerns | Undetected | No concerns | Major concerns | No concerns    | No concerns | Moderate quality |
| Telmisartan 40mg daily vs Vitamin E 800 IU daily and Pioglitazone 45mg daily  | 0 | Some concerns | Undetected | No concerns | Major concerns | No concerns    | No concerns | Moderate quality |
| Telmisartan 40mg daily vs Volixibat 10mg daily                                | 0 | Some concerns | Undetected | No concerns | Major concerns | No concerns    | No concerns | Moderate quality |
| Telmisartan 40mg daily vs Volixibat 20mg daily                                | 0 | Some concerns | Undetected | No concerns | Major concerns | No concerns    | No concerns | Moderate quality |
| Telmisartan 40mg daily vs Volixibat 5mg daily                                 | 0 | Some concerns | Undetected | No concerns | Major concerns | No concerns    | No concerns | Moderate quality |
| omega 3 PUFA (EPA 50.4mg) TID vs Telmisartan 40mg daily                       | 0 | Some concerns | Undetected | No concerns | Major concerns | No concerns    | No concerns | Moderate quality |

|                                                                                     |                          |                          |                       |                     |                    |                      |                    |                          |
|-------------------------------------------------------------------------------------|--------------------------|--------------------------|-----------------------|---------------------|--------------------|----------------------|--------------------|--------------------------|
| UDCA 23mg/kg day vs Vitamin E 800 IU daily                                          | 0                        | No concerns              | Undetected            | No concerns         | No concerns        | Major concerns       | No concerns        | High quality             |
| UDCA 23mg/kg day vs Vitamin E 800 IU daily and Pioglitazone 45mg daily              | 0                        | No concerns              | Undetected            | No concerns         | No concerns        | Major concerns       | No concerns        | High quality             |
| UDCA 23mg/kg day vs Volixibat 10mg daily                                            | 0                        | No concerns              | Undetected            | No concerns         | Major concerns     | No concerns          | No concerns        | High quality             |
| UDCA 23mg/kg day vs Volixibat 20mg daily                                            | 0                        | No concerns              | Undetected            | No concerns         | Major concerns     | No concerns          | No concerns        | High quality             |
| UDCA 23mg/kg day vs Volixibat 5mg daily                                             | 0                        | No concerns              | Undetected            | No concerns         | Major concerns     | No concerns          | No concerns        | High quality             |
| omega 3 PUFA (EPA 50.4mg) TID vs UDCA 23mg/kg day                                   | 0                        | Some concerns            | Undetected            | No concerns         | Major concerns     | No concerns          | No concerns        | Moderate quality         |
| Vitamin E 800 IU daily vs Volixibat 10mg daily                                      | 0                        | No concerns              | Undetected            | No concerns         | No concerns        | Major concerns       | No concerns        | High quality             |
| Vitamin E 800 IU daily vs Volixibat 20mg daily                                      | 0                        | No concerns              | Undetected            | No concerns         | No concerns        | Major concerns       | No concerns        | High quality             |
| Vitamin E 800 IU daily vs Volixibat 5mg daily                                       | 0                        | No concerns              | Undetected            | No concerns         | Major concerns     | No concerns          | No concerns        | High quality             |
| omega 3 PUFA (EPA 50.4mg) TID vs Vitamin E 800 IU daily                             | 0                        | No concerns              | Undetected            | No concerns         | Major concerns     | No concerns          | No concerns        | High quality             |
| Vitamin E 800 IU daily and Pioglitazone 45mg daily vs Volixibat 10mg daily          | 0                        | No concerns              | Undetected            | No concerns         | No concerns        | Major concerns       | No concerns        | High quality             |
| Vitamin E 800 IU daily and Pioglitazone 45mg daily vs Volixibat 20mg daily          | 0                        | No concerns              | Undetected            | No concerns         | No concerns        | Major concerns       | No concerns        | High quality             |
| Vitamin E 800 IU daily and Pioglitazone 45mg daily vs Volixibat 5mg daily           | 0                        | No concerns              | Undetected            | No concerns         | No concerns        | Major concerns       | No concerns        | High quality             |
| omega 3 PUFA (EPA 50.4mg) TID vs Vitamin E 800 IU daily and Pioglitazone 45mg daily | 0                        | No concerns              | Undetected            | No concerns         | Major concerns     | No concerns          | No concerns        | High quality             |
| omega 3 PUFA (EPA 50.4mg) TID vs Volixibat 10mg daily                               | 0                        | No concerns              | Undetected            | No concerns         | Major concerns     | No concerns          | No concerns        | High quality             |
| omega 3 PUFA (EPA 50.4mg) TID vs Volixibat 20mg daily                               | 0                        | No concerns              | Undetected            | No concerns         | Major concerns     | No concerns          | No concerns        | High quality             |
| omega 3 PUFA (EPA 50.4mg) TID vs Volixibat 5mg daily                                | 0                        | No concerns              | Undetected            | No concerns         | Major concerns     | No concerns          | No concerns        | High quality             |
| <b>Mean change in fibrosis score</b>                                                |                          |                          |                       |                     |                    |                      |                    |                          |
| <b>Comparison</b>                                                                   | <b>Number of studies</b> | <b>Within-study bias</b> | <b>Reporting bias</b> | <b>Indirectness</b> | <b>Imprecision</b> | <b>Heterogeneity</b> | <b>Incoherence</b> | <b>Confidence rating</b> |
| Colesevelam 3.75g daily vs Placebo                                                  | 1                        | No concerns              | Undetected            | No concerns         | Major concerns     | No concerns          | No concerns        | High quality             |
| Liraglutide 1.8mg daily vs Placebo                                                  | 1                        | No concerns              | Suspected             | No concerns         | Major concerns     | No concerns          | No concerns        | Low quality              |
| Metadoxine 500mg BID vs Placebo                                                     | 1                        | Some concerns            | Undetected            | No concerns         | Major concerns     | No concerns          | No concerns        | Moderate quality         |
| Metformin 500mg daily vs Placebo                                                    | 1                        | Some concerns            | Suspected             | No concerns         | Major concerns     | No concerns          | No concerns        | Low quality              |
| Obeticholic acid 25mg daily vs Placebo                                              | 1                        | No concerns              | Undetected            | No concerns         | Major concerns     | No concerns          | No concerns        | High quality             |
| Pentoxifylline 400mg TID vs Pioglitazone 30mg daily                                 | 1                        | No concerns              | Undetected            | No concerns         | Major concerns     | No concerns          | No concerns        | High quality             |
| Pentoxifylline 400mg TID vs Placebo                                                 | 2                        | No concerns              | Suspected             | No concerns         | No concerns        | No concerns          | No concerns        | High quality             |
| Pioglitazone 30mg daily vs Placebo                                                  | 1                        | No concerns              | Undetected            | No concerns         | No concerns        | Major concerns       | No concerns        | High quality             |



|                                                                                        |   |                |            |             |                |                |                |                  |
|----------------------------------------------------------------------------------------|---|----------------|------------|-------------|----------------|----------------|----------------|------------------|
| Pioglitazone 30mg daily vs Vitamin E 800 IU daily                                      | 1 | No concerns    | Undetected | No concerns | Major concerns | No concerns    | No concerns    | High quality     |
| Pioglitazone 45mg daily vs Placebo                                                     | 1 | No concerns    | Undetected | No concerns | No concerns    | Major concerns | No concerns    | High quality     |
| Placebo vs Rosiglitazone 8mg daily                                                     | 1 | No concerns    | Undetected | No concerns | Major concerns | No concerns    | No concerns    | High quality     |
| Placebo vs Sitagliptin 100mg daily                                                     | 2 | Some concerns  | Undetected | No concerns | Major concerns | No concerns    | No concerns    | Moderate quality |
| Placebo vs Telmisartan 40mg daily                                                      | 1 | Major concerns | Suspected  | No concerns | No concerns    | No concerns    | No concerns    | Low quality      |
| Placebo vs UDCA 23mg/kg day                                                            | 1 | Some concerns  | Suspected  | No concerns | Major concerns | No concerns    | No concerns    | Low quality      |
| Placebo vs Vitamin E 800 IU daily                                                      | 2 | No concerns    | Undetected | No concerns | No concerns    | Major concerns | Major concerns | Low quality      |
| Placebo vs Vitamin E 800 IU daily and Pioglitazone 45mg daily                          | 1 | No concerns    | Undetected | No concerns | Major concerns | No concerns    | No concerns    | High quality     |
| omega 3 PUFA (EPA 50.4mg) TID vs Placebo                                               | 1 | No concerns    | Suspected  | No concerns | Major concerns | No concerns    | No concerns    | Low quality      |
| Rosiglitazone 8mg and Losartan 50mg daily vs Rosiglitazone 8mg and Metformin 500mg BID | 1 | Major concerns | Undetected | No concerns | Major concerns | No concerns    | No concerns    | Low quality      |
| Rosiglitazone 8mg and Losartan 50mg daily vs Rosiglitazone 8mg daily                   | 1 | Major concerns | Undetected | No concerns | Major concerns | No concerns    | No concerns    | Low quality      |
| Rosiglitazone 8mg and Metformin 500mg BID vs Rosiglitazone 8mg daily                   | 1 | Major concerns | Undetected | No concerns | Major concerns | No concerns    | No concerns    | Low quality      |
| Telmisartan 40mg daily vs Vitamin E 800 IU daily                                       | 1 | Some concerns  | Undetected | No concerns | Major concerns | No concerns    | No concerns    | Moderate quality |
| Vitamin E 800 IU daily vs Vitamin E 800 IU daily and Pioglitazone 45mg daily           | 1 | No concerns    | Undetected | No concerns | Major concerns | No concerns    | No concerns    | High quality     |
| Colesevelam 3.75g daily vs Liraglutide 1.8mg daily                                     | 0 | No concerns    | Undetected | No concerns | Major concerns | No concerns    | No concerns    | High quality     |
| Colesevelam 3.75g daily vs Metadoxine 500mg BID                                        | 0 | Some concerns  | Undetected | No concerns | Major concerns | No concerns    | No concerns    | Moderate quality |
| Colesevelam 3.75g daily vs Metformin 500mg daily                                       | 0 | Some concerns  | Undetected | No concerns | Major concerns | No concerns    | No concerns    | Moderate quality |
| Colesevelam 3.75g daily vs Obeticholic acid 25mg daily                                 | 0 | No concerns    | Undetected | No concerns | Major concerns | No concerns    | No concerns    | High quality     |
| Colesevelam 3.75g daily vs Pentoxifylline 400mg TID                                    | 0 | No concerns    | Undetected | No concerns | Major concerns | No concerns    | No concerns    | High quality     |
| Colesevelam 3.75g daily vs Pioglitazone 30mg daily                                     | 0 | No concerns    | Undetected | No concerns | Major concerns | No concerns    | No concerns    | High quality     |
| Colesevelam 3.75g daily vs Pioglitazone 45mg daily                                     | 0 | No concerns    | Undetected | No concerns | Major concerns | No concerns    | No concerns    | High quality     |
| Colesevelam 3.75g daily vs Rosiglitazone 8mg and Losartan 50mg daily                   | 0 | Some concerns  | Undetected | No concerns | Major concerns | No concerns    | No concerns    | Moderate quality |
| Colesevelam 3.75g daily vs Rosiglitazone 8mg and Metformin 500mg BID                   | 0 | Some concerns  | Undetected | No concerns | Major concerns | No concerns    | No concerns    | Moderate quality |
| Colesevelam 3.75g daily vs Rosiglitazone 8mg daily                                     | 0 | No concerns    | Undetected | No concerns | Major concerns | No concerns    | No concerns    | High quality     |
| Colesevelam 3.75g daily vs Sitagliptin 100mg daily                                     | 0 | Some concerns  | Undetected | No concerns | Major concerns | No concerns    | No concerns    | Moderate quality |
| Colesevelam 3.75g daily vs Telmisartan 40mg daily                                      | 0 | Some concerns  | Undetected | No concerns | Major concerns | No concerns    | No concerns    | Moderate quality |



|                                                                               |   |               |            |             |                |                |             |                  |
|-------------------------------------------------------------------------------|---|---------------|------------|-------------|----------------|----------------|-------------|------------------|
| Colesevelam 3.75g daily vs UDCA 23mg/kg day                                   | 0 | Some concerns | Undetected | No concerns | Major concerns | No concerns    | No concerns | Moderate quality |
| Colesevelam 3.75g daily vs Vitamin E 800 IU daily                             | 0 | No concerns   | Undetected | No concerns | Major concerns | No concerns    | No concerns | High quality     |
| Colesevelam 3.75g daily vs Vitamin E 800 IU daily and Pioglitazone 45mg daily | 0 | No concerns   | Undetected | No concerns | Major concerns | No concerns    | No concerns | High quality     |
| Colesevelam 3.75g daily vs omega 3 PUFA (EPA 50.4mg) TID                      | 0 | No concerns   | Undetected | No concerns | Major concerns | No concerns    | No concerns | High quality     |
| Liraglutide 1.8mg daily vs Metadoxine 500mg BID                               | 0 | Some concerns | Undetected | No concerns | Major concerns | No concerns    | No concerns | Moderate quality |
| Liraglutide 1.8mg daily vs Metformin 500mg daily                              | 0 | Some concerns | Undetected | No concerns | Major concerns | No concerns    | No concerns | Moderate quality |
| Liraglutide 1.8mg daily vs Obeticholic acid 25mg daily                        | 0 | No concerns   | Undetected | No concerns | Major concerns | No concerns    | No concerns | High quality     |
| Liraglutide 1.8mg daily vs Pentoxifylline 400mg TID                           | 0 | No concerns   | Undetected | No concerns | Major concerns | No concerns    | No concerns | High quality     |
| Liraglutide 1.8mg daily vs Pioglitazone 30mg daily                            | 0 | No concerns   | Undetected | No concerns | Major concerns | No concerns    | No concerns | High quality     |
| Liraglutide 1.8mg daily vs Pioglitazone 45mg daily                            | 0 | No concerns   | Undetected | No concerns | Major concerns | No concerns    | No concerns | High quality     |
| Liraglutide 1.8mg daily vs Rosiglitazone 8mg and Losartan 50mg daily          | 0 | Some concerns | Undetected | No concerns | Major concerns | No concerns    | No concerns | Moderate quality |
| Liraglutide 1.8mg daily vs Rosiglitazone 8mg and Metformin 500mg BID          | 0 | Some concerns | Undetected | No concerns | Major concerns | No concerns    | No concerns | Moderate quality |
| Liraglutide 1.8mg daily vs Rosiglitazone 8mg daily                            | 0 | No concerns   | Undetected | No concerns | Major concerns | No concerns    | No concerns | High quality     |
| Liraglutide 1.8mg daily vs Sitagliptin 100mg daily                            | 0 | Some concerns | Undetected | No concerns | Major concerns | No concerns    | No concerns | Moderate quality |
| Liraglutide 1.8mg daily vs Telmisartan 40mg daily                             | 0 | Some concerns | Undetected | No concerns | Major concerns | No concerns    | No concerns | Moderate quality |
| Liraglutide 1.8mg daily vs UDCA 23mg/kg day                                   | 0 | Some concerns | Undetected | No concerns | Major concerns | No concerns    | No concerns | Moderate quality |
| Liraglutide 1.8mg daily vs Vitamin E 800 IU daily                             | 0 | No concerns   | Undetected | No concerns | Major concerns | No concerns    | No concerns | High quality     |
| Liraglutide 1.8mg daily vs Vitamin E 800 IU daily and Pioglitazone 45mg daily | 0 | No concerns   | Undetected | No concerns | Major concerns | No concerns    | No concerns | High quality     |
| Liraglutide 1.8mg daily vs omega 3 PUFA (EPA 50.4mg) TID                      | 0 | No concerns   | Undetected | No concerns | Major concerns | No concerns    | No concerns | High quality     |
| Metadoxine 500mg BID vs Metformin 500mg daily                                 | 0 | Some concerns | Undetected | No concerns | Major concerns | No concerns    | No concerns | Moderate quality |
| Metadoxine 500mg BID vs Obeticholic acid 25mg daily                           | 0 | Some concerns | Undetected | No concerns | Major concerns | No concerns    | No concerns | Moderate quality |
| Metadoxine 500mg BID vs Pentoxifylline 400mg TID                              | 0 | Some concerns | Undetected | No concerns | No concerns    | Major concerns | No concerns | Moderate quality |
| Metadoxine 500mg BID vs Pioglitazone 30mg daily                               | 0 | Some concerns | Undetected | No concerns | Major concerns | No concerns    | No concerns | Moderate quality |
| Metadoxine 500mg BID vs Pioglitazone 45mg daily                               | 0 | Some concerns | Undetected | No concerns | Major concerns | No concerns    | No concerns | Moderate quality |
| Metadoxine 500mg BID vs Rosiglitazone 8mg and Losartan 50mg daily             | 0 | Some concerns | Undetected | No concerns | Major concerns | No concerns    | No concerns | Moderate quality |

|                                                                             |   |               |            |             |                |                |             |                  |
|-----------------------------------------------------------------------------|---|---------------|------------|-------------|----------------|----------------|-------------|------------------|
| Metadoxine 500mg BID vs Rosiglitazone 8mg and Metformin 500mg BID           | 0 | Some concerns | Undetected | No concerns | Major concerns | No concerns    | No concerns | Moderate quality |
| Metadoxine 500mg BID vs Rosiglitazone 8mg daily                             | 0 | Some concerns | Undetected | No concerns | Major concerns | No concerns    | No concerns | Moderate quality |
| Metadoxine 500mg BID vs Sitagliptin 100mg daily                             | 0 | Some concerns | Undetected | No concerns | Major concerns | No concerns    | No concerns | Moderate quality |
| Metadoxine 500mg BID vs Telmisartan 40mg daily                              | 0 | Some concerns | Undetected | No concerns | No concerns    | Major concerns | No concerns | Moderate quality |
| Metadoxine 500mg BID vs UDCA 23mg/kg day                                    | 0 | Some concerns | Undetected | No concerns | Major concerns | No concerns    | No concerns | Moderate quality |
| Metadoxine 500mg BID vs Vitamin E 800 IU daily                              | 0 | Some concerns | Undetected | No concerns | Major concerns | No concerns    | No concerns | Moderate quality |
| Metadoxine 500mg BID vs Vitamin E 800 IU daily and Pioglitazone 45mg daily  | 0 | No concerns   | Undetected | No concerns | Major concerns | No concerns    | No concerns | High quality     |
| Metadoxine 500mg BID vs omega 3 PUFA (EPA 50.4mg) TID                       | 0 | Some concerns | Undetected | No concerns | Major concerns | No concerns    | No concerns | Moderate quality |
| Metformin 500mg daily vs Obeticholic acid 25mg daily                        | 0 | Some concerns | Undetected | No concerns | Major concerns | No concerns    | No concerns | Moderate quality |
| Metformin 500mg daily vs Pentoxifylline 400mg TID                           | 0 | Some concerns | Undetected | No concerns | Major concerns | No concerns    | No concerns | Moderate quality |
| Metformin 500mg daily vs Pioglitazone 30mg daily                            | 0 | Some concerns | Undetected | No concerns | Major concerns | No concerns    | No concerns | Moderate quality |
| Metformin 500mg daily vs Pioglitazone 45mg daily                            | 0 | Some concerns | Undetected | No concerns | Major concerns | No concerns    | No concerns | Moderate quality |
| Metformin 500mg daily vs Rosiglitazone 8mg and Losartan 50mg daily          | 0 | Some concerns | Undetected | No concerns | Major concerns | No concerns    | No concerns | Moderate quality |
| Metformin 500mg daily vs Rosiglitazone 8mg and Metformin 500mg BID          | 0 | Some concerns | Undetected | No concerns | Major concerns | No concerns    | No concerns | Moderate quality |
| Metformin 500mg daily vs Rosiglitazone 8mg daily                            | 0 | Some concerns | Undetected | No concerns | Major concerns | No concerns    | No concerns | Moderate quality |
| Metformin 500mg daily vs Sitagliptin 100mg daily                            | 0 | Some concerns | Undetected | No concerns | Major concerns | No concerns    | No concerns | Moderate quality |
| Metformin 500mg daily vs Telmisartan 40mg daily                             | 0 | Some concerns | Undetected | No concerns | Major concerns | No concerns    | No concerns | Moderate quality |
| Metformin 500mg daily vs UDCA 23mg/kg day                                   | 0 | Some concerns | Undetected | No concerns | Major concerns | No concerns    | No concerns | Moderate quality |
| Metformin 500mg daily vs Vitamin E 800 IU daily                             | 0 | Some concerns | Undetected | No concerns | Major concerns | No concerns    | No concerns | Moderate quality |
| Metformin 500mg daily vs Vitamin E 800 IU daily and Pioglitazone 45mg daily | 0 | No concerns   | Undetected | No concerns | Major concerns | No concerns    | No concerns | High quality     |
| Metformin 500mg daily vs omega 3 PUFA (EPA 50.4mg) TID                      | 0 | Some concerns | Undetected | No concerns | Major concerns | No concerns    | No concerns | Moderate quality |
| Obeticholic acid 25mg daily vs Pentoxifylline 400mg TID                     | 0 | No concerns   | Undetected | No concerns | Major concerns | No concerns    | No concerns | High quality     |
| Obeticholic acid 25mg daily vs Pioglitazone 30mg daily                      | 0 | No concerns   | Undetected | No concerns | Major concerns | No concerns    | No concerns | High quality     |
| Obeticholic acid 25mg daily vs Pioglitazone 45mg daily                      | 0 | No concerns   | Undetected | No concerns | Major concerns | No concerns    | No concerns | High quality     |

|                                                                                   |   |               |            |             |                |                |             |                  |
|-----------------------------------------------------------------------------------|---|---------------|------------|-------------|----------------|----------------|-------------|------------------|
| Obeticholic acid 25mg daily vs Rosiglitazone 8mg and Losartan 50mg daily          | 0 | Some concerns | Undetected | No concerns | Major concerns | No concerns    | No concerns | Moderate quality |
| Obeticholic acid 25mg daily vs Rosiglitazone 8mg and Metformin 500mg BID          | 0 | Some concerns | Undetected | No concerns | Major concerns | No concerns    | No concerns | Moderate quality |
| Obeticholic acid 25mg daily vs Rosiglitazone 8mg daily                            | 0 | No concerns   | Undetected | No concerns | Major concerns | No concerns    | No concerns | High quality     |
| Obeticholic acid 25mg daily vs Sitagliptin 100mg daily                            | 0 | Some concerns | Undetected | No concerns | Major concerns | No concerns    | No concerns | Moderate quality |
| Obeticholic acid 25mg daily vs Telmisartan 40mg daily                             | 0 | Some concerns | Undetected | No concerns | Major concerns | No concerns    | No concerns | Moderate quality |
| Obeticholic acid 25mg daily vs UDCA 23mg/kg day                                   | 0 | Some concerns | Undetected | No concerns | Major concerns | No concerns    | No concerns | Moderate quality |
| Obeticholic acid 25mg daily vs Vitamin E 800 IU daily                             | 0 | No concerns   | Undetected | No concerns | Major concerns | No concerns    | No concerns | High quality     |
| Obeticholic acid 25mg daily vs Vitamin E 800 IU daily and Pioglitazone 45mg daily | 0 | No concerns   | Undetected | No concerns | Major concerns | No concerns    | No concerns | High quality     |
| Obeticholic acid 25mg daily vs omega 3 PUFA (EPA 50.4mg) TID                      | 0 | No concerns   | Undetected | No concerns | Major concerns | No concerns    | No concerns | High quality     |
| Pentoxifylline 400mg TID vs Pioglitazone 45mg daily                               | 0 | No concerns   | Undetected | No concerns | Major concerns | No concerns    | No concerns | High quality     |
| Pentoxifylline 400mg TID vs Rosiglitazone 8mg and Losartan 50mg daily             | 0 | Some concerns | Undetected | No concerns | No concerns    | Major concerns | No concerns | Moderate quality |
| Pentoxifylline 400mg TID vs Rosiglitazone 8mg and Metformin 500mg BID             | 0 | Some concerns | Undetected | No concerns | Major concerns | No concerns    | No concerns | Moderate quality |
| Pentoxifylline 400mg TID vs Rosiglitazone 8mg daily                               | 0 | No concerns   | Undetected | No concerns | No concerns    | Major concerns | No concerns | High quality     |
| Pentoxifylline 400mg TID vs Sitagliptin 100mg daily                               | 0 | Some concerns | Undetected | No concerns | No concerns    | Major concerns | No concerns | Moderate quality |
| Pentoxifylline 400mg TID vs Telmisartan 40mg daily                                | 0 | Some concerns | Undetected | No concerns | Major concerns | No concerns    | No concerns | Moderate quality |
| Pentoxifylline 400mg TID vs UDCA 23mg/kg day                                      | 0 | Some concerns | Undetected | No concerns | No concerns    | No concerns    | No concerns | High quality     |
| Pentoxifylline 400mg TID vs Vitamin E 800 IU daily                                | 0 | No concerns   | Undetected | No concerns | Major concerns | No concerns    | No concerns | High quality     |
| Pentoxifylline 400mg TID vs Vitamin E 800 IU daily and Pioglitazone 45mg daily    | 0 | No concerns   | Undetected | No concerns | Major concerns | No concerns    | No concerns | High quality     |
| omega 3 PUFA (EPA 50.4mg) TID vs Pentoxifylline 400mg TID                         | 0 | No concerns   | Undetected | No concerns | No concerns    | Major concerns | No concerns | High quality     |
| Pioglitazone 30mg daily vs Pioglitazone 45mg daily                                | 0 | No concerns   | Undetected | No concerns | Major concerns | No concerns    | No concerns | High quality     |
| Pioglitazone 30mg daily vs Rosiglitazone 8mg and Losartan 50mg daily              | 0 | Some concerns | Undetected | No concerns | No concerns    | Major concerns | No concerns | Moderate quality |
| Pioglitazone 30mg daily vs Rosiglitazone 8mg and Metformin 500mg BID              | 0 | Some concerns | Undetected | No concerns | Major concerns | No concerns    | No concerns | Moderate quality |

|                                                                                                 |   |               |            |             |                |                |             |                  |
|-------------------------------------------------------------------------------------------------|---|---------------|------------|-------------|----------------|----------------|-------------|------------------|
| Pioglitazone 30mg daily vs Rosiglitazone 8mg daily                                              | 0 | No concerns   | Undetected | No concerns | No concerns    | Major concerns | No concerns | High quality     |
| Pioglitazone 30mg daily vs Sitagliptin 100mg daily                                              | 0 | Some concerns | Undetected | No concerns | Major concerns | No concerns    | No concerns | Moderate quality |
| Pioglitazone 30mg daily vs Telmisartan 40mg daily                                               | 0 | Some concerns | Undetected | No concerns | Major concerns | No concerns    | No concerns | Moderate quality |
| Pioglitazone 30mg daily vs UDCA 23mg/kg day                                                     | 0 | Some concerns | Undetected | No concerns | No concerns    | Major concerns | No concerns | Moderate quality |
| Pioglitazone 30mg daily vs Vitamin E 800 IU daily and Pioglitazone 45mg daily                   | 0 | No concerns   | Undetected | No concerns | Major concerns | No concerns    | No concerns | High quality     |
| omega 3 PUFA (EPA 50.4mg) TID vs Pioglitazone 30mg daily                                        | 0 | No concerns   | Undetected | No concerns | Major concerns | No concerns    | No concerns | High quality     |
| Pioglitazone 45mg daily vs Rosiglitazone 8mg and Losartan 50mg daily                            | 0 | Some concerns | Undetected | No concerns | No concerns    | Major concerns | No concerns | Moderate quality |
| Pioglitazone 45mg daily vs Rosiglitazone 8mg and Metformin 500mg BID                            | 0 | Some concerns | Undetected | No concerns | Major concerns | No concerns    | No concerns | Moderate quality |
| Pioglitazone 45mg daily vs Rosiglitazone 8mg daily                                              | 0 | No concerns   | Undetected | No concerns | Major concerns | No concerns    | No concerns | High quality     |
| Pioglitazone 45mg daily vs Sitagliptin 100mg daily                                              | 0 | Some concerns | Undetected | No concerns | Major concerns | No concerns    | No concerns | Moderate quality |
| Pioglitazone 45mg daily vs Telmisartan 40mg daily                                               | 0 | Some concerns | Undetected | No concerns | Major concerns | No concerns    | No concerns | Moderate quality |
| Pioglitazone 45mg daily vs UDCA 23mg/kg day                                                     | 0 | Some concerns | Undetected | No concerns | No concerns    | Major concerns | No concerns | Moderate quality |
| Pioglitazone 45mg daily vs Vitamin E 800 IU daily                                               | 0 | No concerns   | Undetected | No concerns | Major concerns | No concerns    | No concerns | High quality     |
| Pioglitazone 45mg daily vs Vitamin E 800 IU daily and Pioglitazone 45mg daily                   | 0 | No concerns   | Undetected | No concerns | Major concerns | No concerns    | No concerns | High quality     |
| omega 3 PUFA (EPA 50.4mg) TID vs Pioglitazone 45mg daily                                        | 0 | No concerns   | Undetected | No concerns | Major concerns | No concerns    | No concerns | High quality     |
| Placebo vs Rosiglitazone 8mg and Losartan 50mg daily                                            | 0 | Some concerns | Undetected | No concerns | Major concerns | No concerns    | No concerns | Moderate quality |
| Placebo vs Rosiglitazone 8mg and Metformin 500mg BID                                            | 0 | Some concerns | Undetected | No concerns | Major concerns | No concerns    | No concerns | Moderate quality |
| Rosiglitazone 8mg and Losartan 50mg daily vs Sitagliptin 100mg daily                            | 0 | Some concerns | Undetected | No concerns | Major concerns | No concerns    | No concerns | Moderate quality |
| Rosiglitazone 8mg and Losartan 50mg daily vs Telmisartan 40mg daily                             | 0 | Some concerns | Undetected | No concerns | No concerns    | Major concerns | No concerns | Moderate quality |
| Rosiglitazone 8mg and Losartan 50mg daily vs UDCA 23mg/kg day                                   | 0 | Some concerns | Undetected | No concerns | Major concerns | No concerns    | No concerns | Moderate quality |
| Rosiglitazone 8mg and Losartan 50mg daily vs Vitamin E 800 IU daily                             | 0 | Some concerns | Undetected | No concerns | No concerns    | Major concerns | No concerns | Moderate quality |
| Rosiglitazone 8mg and Losartan 50mg daily vs Vitamin E 800 IU daily and Pioglitazone 45mg daily | 0 | Some concerns | Undetected | No concerns | Major concerns | No concerns    | No concerns | Moderate quality |
| omega 3 PUFA (EPA 50.4mg) TID vs Rosiglitazone 8mg and Losartan 50mg daily                      | 0 | Some concerns | Undetected | No concerns | Major concerns | No concerns    | No concerns | Moderate quality |

|                                                                                                 |   |               |            |             |                |                |             |                  |
|-------------------------------------------------------------------------------------------------|---|---------------|------------|-------------|----------------|----------------|-------------|------------------|
| Rosiglitazone 8mg and Metformin 500mg BID vs Sitagliptin 100mg daily                            | 0 | Some concerns | Undetected | No concerns | Major concerns | No concerns    | No concerns | Moderate quality |
| Rosiglitazone 8mg and Metformin 500mg BID vs Telmisartan 40mg daily                             | 0 | Some concerns | Undetected | No concerns | No concerns    | Major concerns | No concerns | Moderate quality |
| Rosiglitazone 8mg and Metformin 500mg BID vs UDCA 23mg/kg day                                   | 0 | Some concerns | Undetected | No concerns | Major concerns | No concerns    | No concerns | Moderate quality |
| Rosiglitazone 8mg and Metformin 500mg BID vs Vitamin E 800 IU daily                             | 0 | Some concerns | Undetected | No concerns | Major concerns | No concerns    | No concerns | Moderate quality |
| Rosiglitazone 8mg and Metformin 500mg BID vs Vitamin E 800 IU daily and Pioglitazone 45mg daily | 0 | Some concerns | Undetected | No concerns | Major concerns | No concerns    | No concerns | Moderate quality |
| omega 3 PUFA (EPA 50.4mg) TID vs Rosiglitazone 8mg and Metformin 500mg BID                      | 0 | Some concerns | Undetected | No concerns | Major concerns | No concerns    | No concerns | Moderate quality |
| Rosiglitazone 8mg daily vs Sitagliptin 100mg daily                                              | 0 | Some concerns | Undetected | No concerns | Major concerns | No concerns    | No concerns | Moderate quality |
| Rosiglitazone 8mg daily vs Telmisartan 40mg daily                                               | 0 | Some concerns | Undetected | No concerns | No concerns    | Major concerns | No concerns | Moderate quality |
| Rosiglitazone 8mg daily vs UDCA 23mg/kg day                                                     | 0 | Some concerns | Undetected | No concerns | Major concerns | No concerns    | No concerns | Moderate quality |
| Rosiglitazone 8mg daily vs Vitamin E 800 IU daily                                               | 0 | No concerns   | Undetected | No concerns | Major concerns | No concerns    | No concerns | High quality     |
| Rosiglitazone 8mg daily vs Vitamin E 800 IU daily and Pioglitazone 45mg daily                   | 0 | No concerns   | Undetected | No concerns | Major concerns | No concerns    | No concerns | High quality     |
| omega 3 PUFA (EPA 50.4mg) TID vs Rosiglitazone 8mg daily                                        | 0 | No concerns   | Undetected | No concerns | Major concerns | No concerns    | No concerns | High quality     |
| Sitagliptin 100mg daily vs Telmisartan 40mg daily                                               | 0 | Some concerns | Undetected | No concerns | No concerns    | Major concerns | No concerns | Moderate quality |
| Sitagliptin 100mg daily vs UDCA 23mg/kg day                                                     | 0 | Some concerns | Undetected | No concerns | Major concerns | No concerns    | No concerns | Moderate quality |
| Sitagliptin 100mg daily vs Vitamin E 800 IU daily                                               | 0 | Some concerns | Undetected | No concerns | Major concerns | No concerns    | No concerns | Moderate quality |
| Sitagliptin 100mg daily vs Vitamin E 800 IU daily and Pioglitazone 45mg daily                   | 0 | Some concerns | Undetected | No concerns | Major concerns | No concerns    | No concerns | Moderate quality |
| omega 3 PUFA (EPA 50.4mg) TID vs Sitagliptin 100mg daily                                        | 0 | Some concerns | Undetected | No concerns | Major concerns | No concerns    | No concerns | Moderate quality |
| Telmisartan 40mg daily vs UDCA 23mg/kg day                                                      | 0 | Some concerns | Undetected | No concerns | No concerns    | Major concerns | No concerns | Moderate quality |
| Telmisartan 40mg daily vs Vitamin E 800 IU daily and Pioglitazone 45mg daily                    | 0 | Some concerns | Undetected | No concerns | Major concerns | No concerns    | No concerns | Moderate quality |
| omega 3 PUFA (EPA 50.4mg) TID vs Telmisartan 40mg daily                                         | 0 | Some concerns | Undetected | No concerns | No concerns    | Major concerns | No concerns | Moderate quality |
| UDCA 23mg/kg day vs Vitamin E 800 IU daily                                                      | 0 | Some concerns | Undetected | No concerns | No concerns    | Major concerns | No concerns | Moderate quality |
| UDCA 23mg/kg day vs Vitamin E 800 IU daily and Pioglitazone 45mg daily                          | 0 | No concerns   | Undetected | No concerns | Major concerns | No concerns    | No concerns | High quality     |
| omega 3 PUFA (EPA 50.4mg) TID vs UDCA 23mg/kg day                                               | 0 | Some concerns | Undetected | No concerns | Major concerns | No concerns    | No concerns | Moderate quality |
| omega 3 PUFA (EPA 50.4mg) TID vs Vitamin E 800 IU daily                                         | 0 | No concerns   | Undetected | No concerns | Major concerns | No concerns    | No concerns | High quality     |

|                                                                                           |   |             |            |             |                |             |             |              |
|-------------------------------------------------------------------------------------------|---|-------------|------------|-------------|----------------|-------------|-------------|--------------|
| omega 3 PUFA (EPA 50.4mg) TID vs<br>Vitamin E 800 IU daily and Pioglitazone<br>45mg daily | 0 | No concerns | Undetected | No concerns | Major concerns | No concerns | No concerns | High quality |
|-------------------------------------------------------------------------------------------|---|-------------|------------|-------------|----------------|-------------|-------------|--------------|

## Appendix 13: NMA subgroup analysis after removal of clinical studies reporting all patients with cirrhosis at baseline

e-Figure 46:  $\geq 2$ -point decrease in NAFLD Activity Score [NAS]

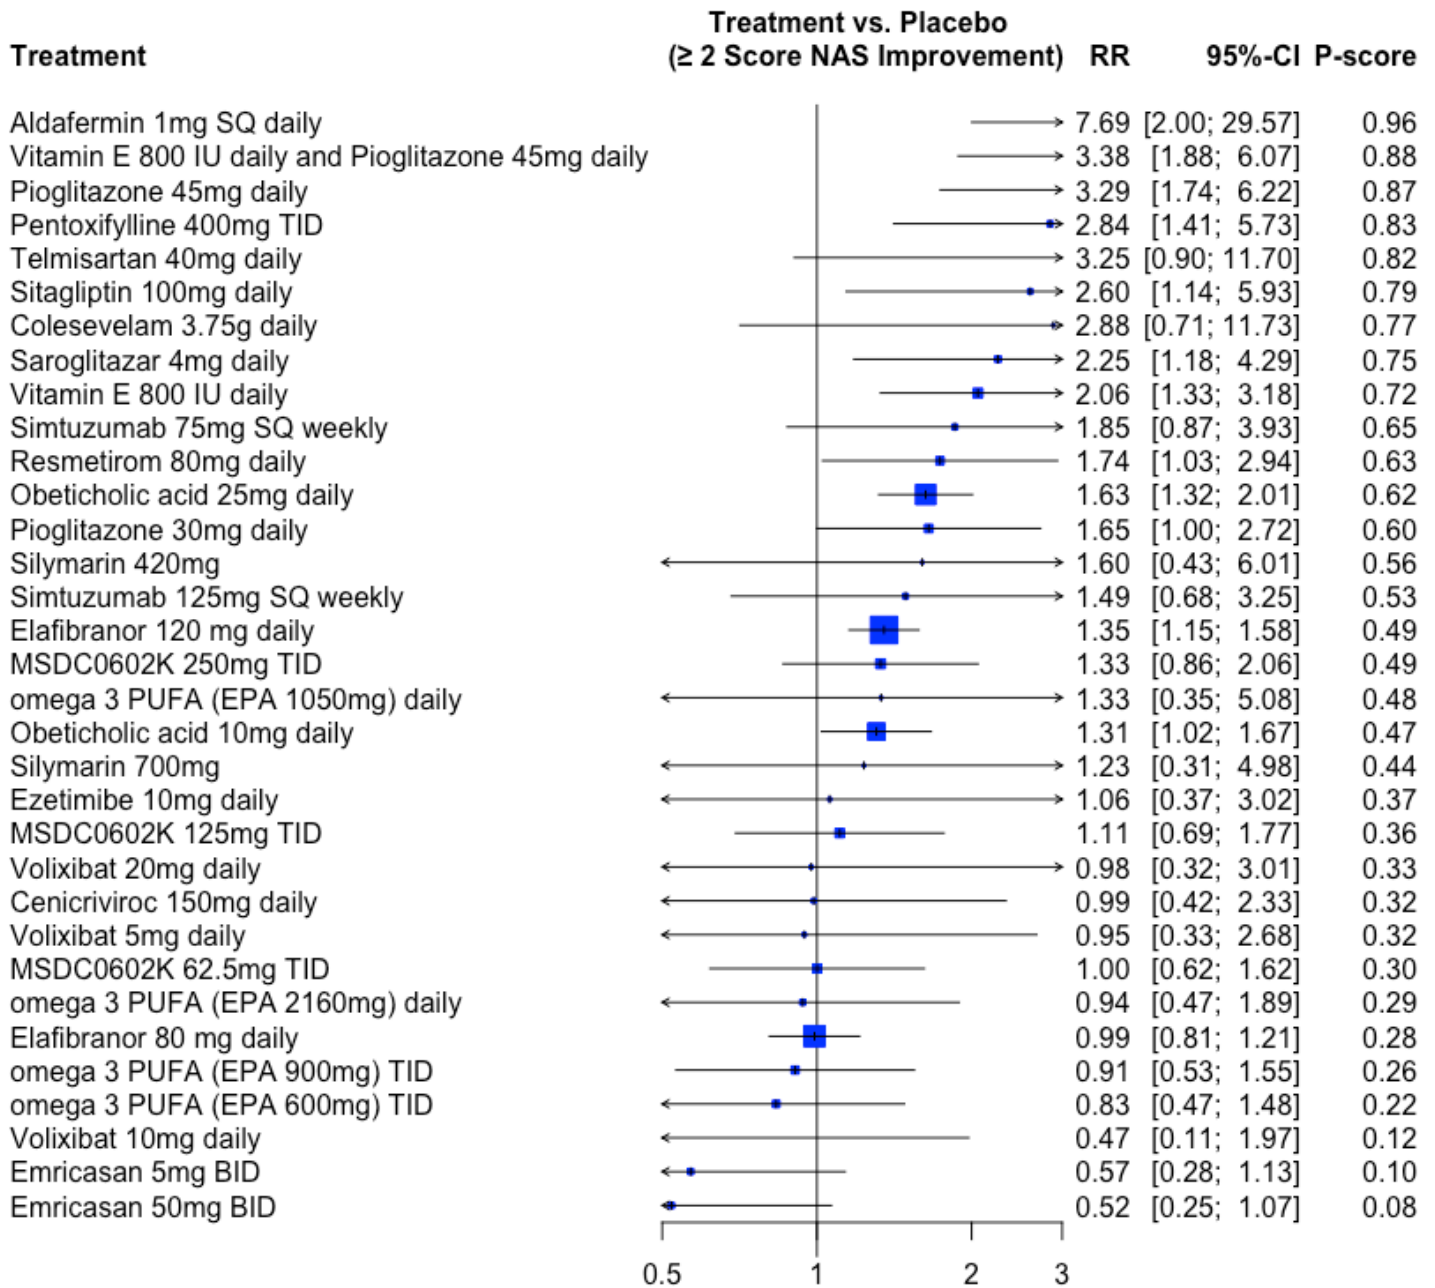

Forest plot for patients achieving  $\geq 2$ -point decrease in NAFLD Activity Score [NAS] based on subgroup analysis after all patients with reported cirrhosis at baseline were excluded. All treatments are reported in comparison to placebo and sorted in order of relative treatment rank. Relative treatment rank is derived from the P-score, which ranges from 1 (best) to 0 (worst). In other words, a P-score closer to 1 indicates a greater probability of achieving the highest ranking, whereas a P-score approaching 0 would indicate a greater probability of achieving the worst ranking.



e-Figure 47: NASH resolution without worsening fibrosis

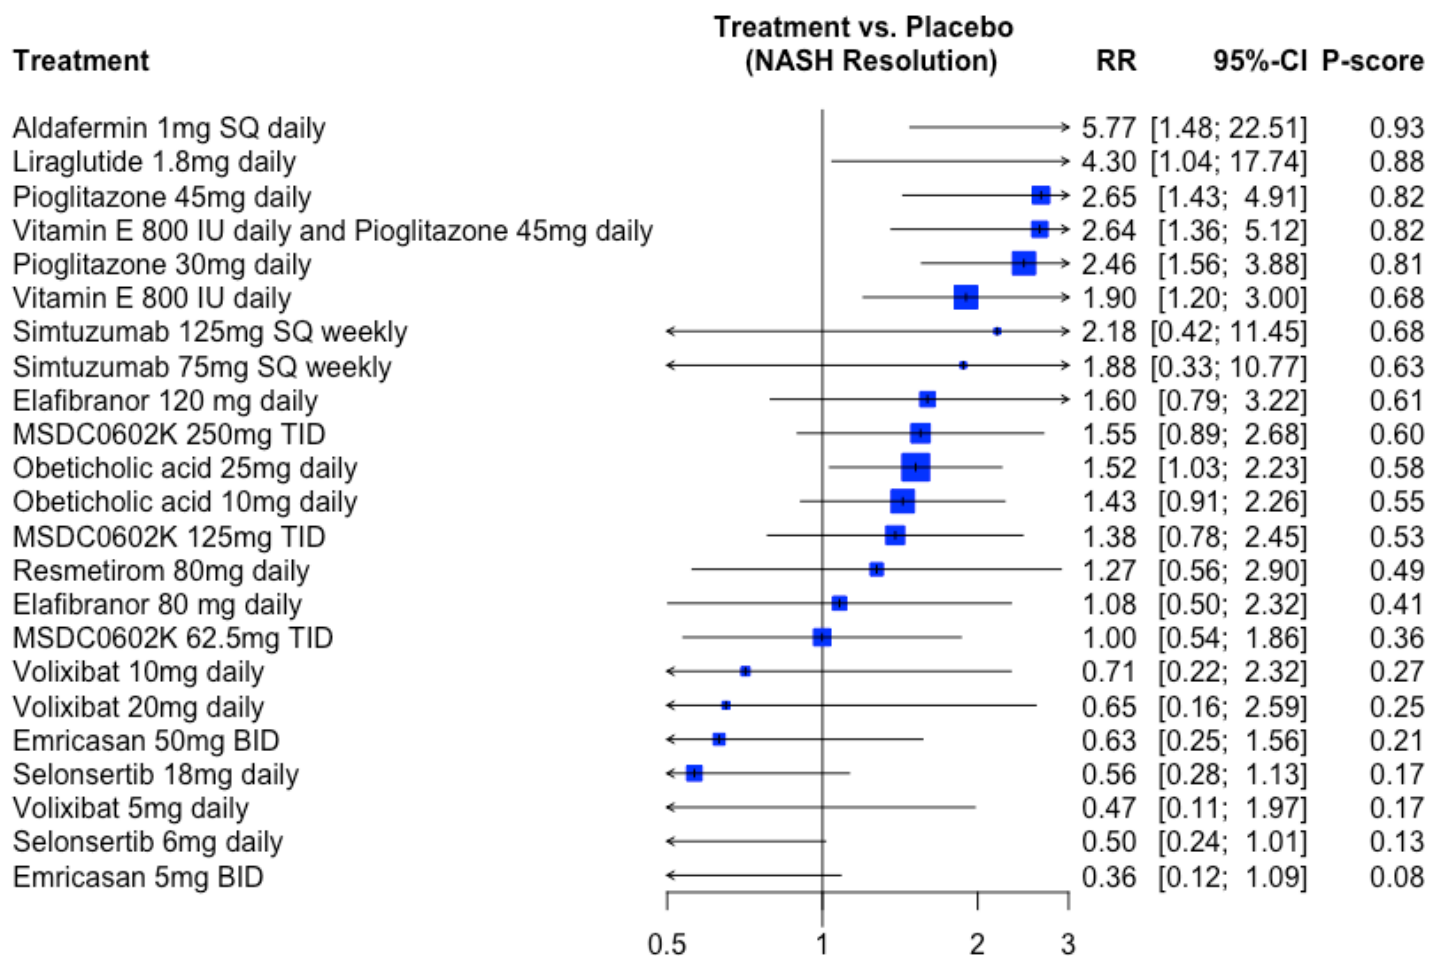

Forest plot for patients achieving NASH resolution without worsening fibrosis based on subgroup analysis after all patients with reported cirrhosis at baseline were excluded. All treatments are reported in comparison to placebo and sorted in order of relative treatment rank. Relative treatment rank is derived from the P-score, which ranges from 1 (best) to 0 (worst). In other words, a P-score closer to 1 indicates a greater probability of achieving the highest ranking, whereas a P-score approaching 0 would indicate a greater probability of achieving the worst ranking.



e-Figure 48: Fibrosis improvement without worsening NASH

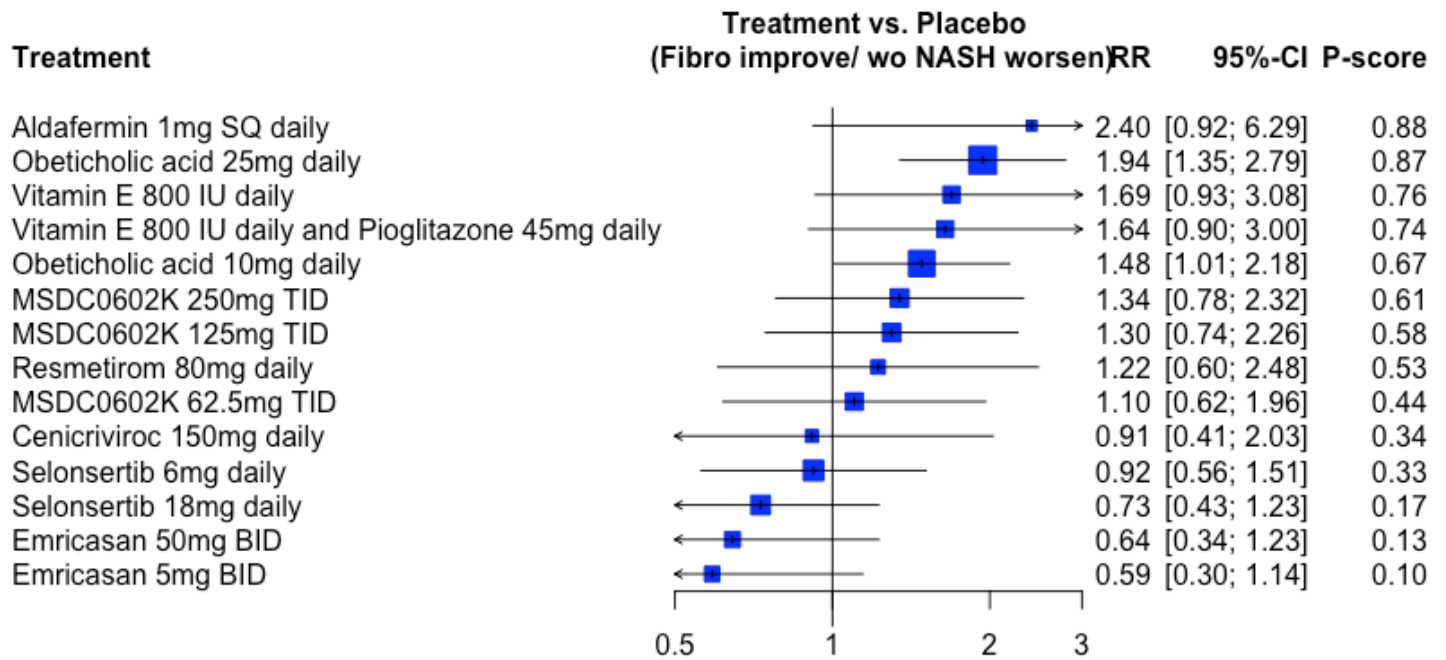

Forest plot for patients achieving improvement in fibrosis without worsening NASH based on subgroup analysis after all patients with reported cirrhosis at baseline were excluded. All treatments are reported in comparison to placebo and sorted in order of relative treatment rank. Relative treatment rank is derived from the P-score, which ranges from 1 (best) to 0 (worst). In other words, a P-score closer to 1 indicates a greater probability of achieving the highest ranking, whereas a P-score approaching 0 would indicate a greater probability of achieving the worst ranking.

e-Figure 49: Fibrosis improvement regardless of NASH progression

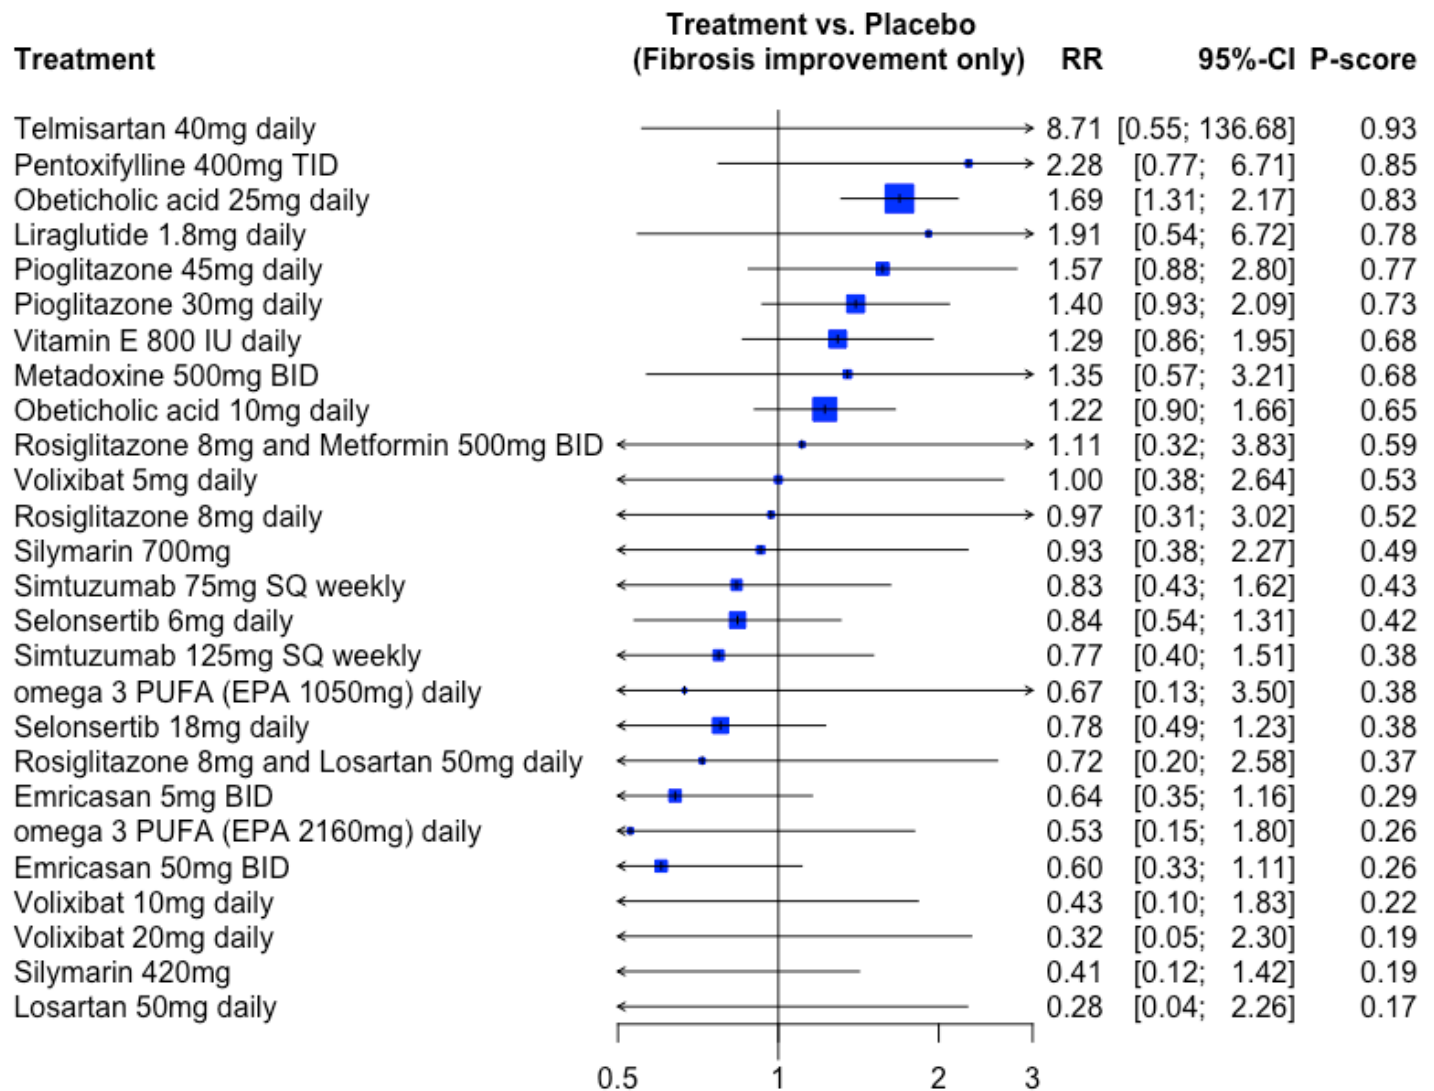

Forest plot for patients achieving improvement in fibrosis regardless of NASH progression based on subgroup analysis after all patients with reported cirrhosis at baseline were excluded. All treatments are reported in comparison to placebo and sorted in order of relative treatment rank. Relative treatment rank is derived from the P-score, which ranges from 1 (best) to 0 (worst). In other words, a P-score closer to 1 indicates a greater probability of achieving the highest ranking, whereas a P-score approaching 0 would indicate a greater probability of achieving the worst ranking.

e-Figure 50: Mean change in NAFLD Activity Score [NAS]

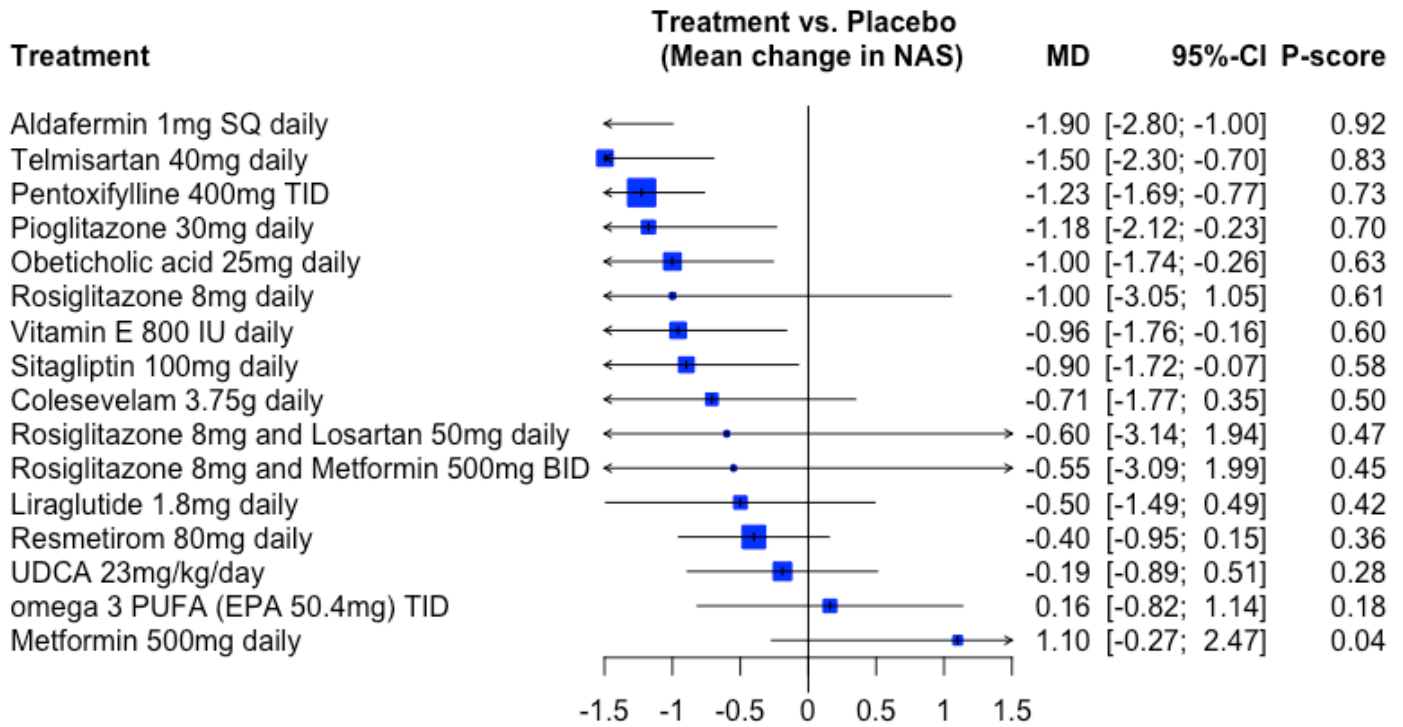

Forest plot for mean change in NAFLD Activity Score [NAS] based on subgroup analysis after all patients with reported cirrhosis at baseline were excluded. All treatments are reported in comparison to placebo and sorted in order of relative treatment rank. Relative treatment rank is derived from the P-score, which ranges from 1 (best) to 0 (worst). In other words, a P-score closer to 1 indicates a greater probability of achieving the highest ranking, whereas a P-score approaching 0 would indicate a greater probability of achieving the worst ranking.

e-Figure 51: Mean change in steatosis

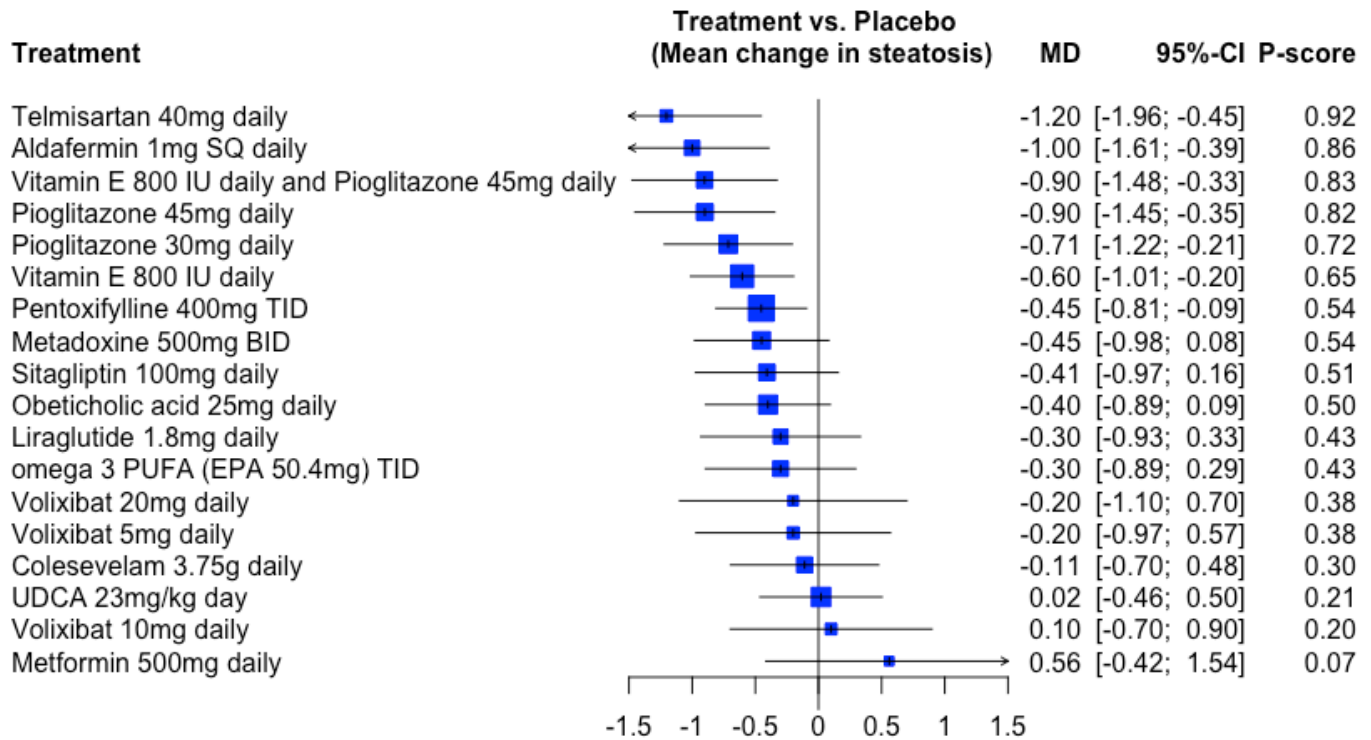

Forest plot for mean change in steatosis based on subgroup analysis after all patients with reported cirrhosis at baseline were excluded. All treatments are reported in comparison to placebo and sorted in order of relative treatment rank. Relative treatment rank is derived from the P-score, which ranges from 1 (best) to 0 (worst). In other words, a P-score closer to 1 indicates a greater probability of achieving the highest ranking, whereas a P-score approaching 0 would indicate a greater probability of achieving the worst ranking.

e-Figure 52: Mean change in lobular inflammation

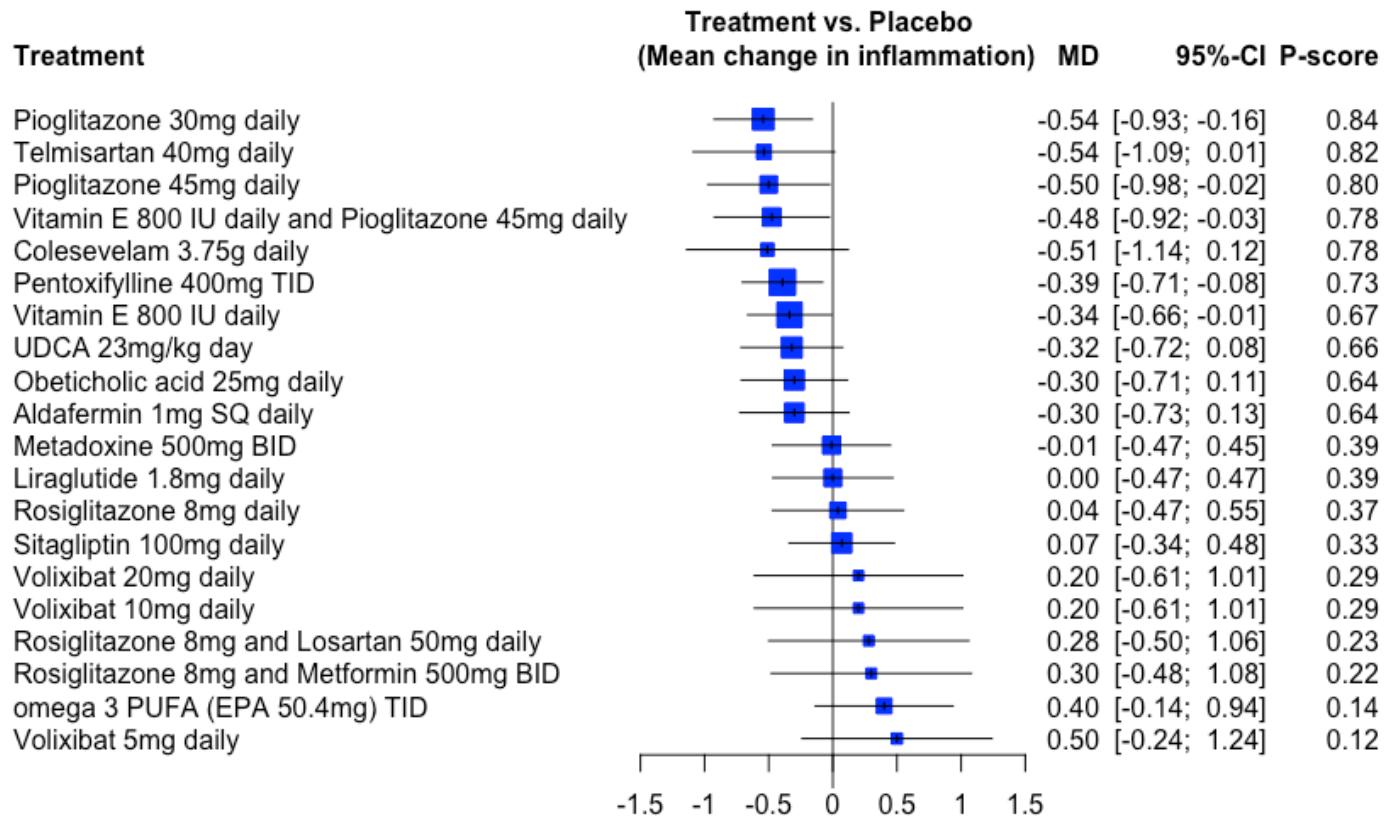

Forest plot for mean change in lobular inflammation based on subgroup analysis after all patients with reported cirrhosis at baseline were excluded. All treatments are reported in comparison to placebo and sorted in order of relative treatment rank. Relative treatment rank is derived from the P-score, which ranges from 1 (best) to 0 (worst). In other words, a P-score closer to 1 indicates a greater probability of achieving the highest ranking, whereas a P-score approaching 0 would indicate a greater probability of achieving the worst ranking.

e-Figure 53: Mean change in hepatocellular ballooning

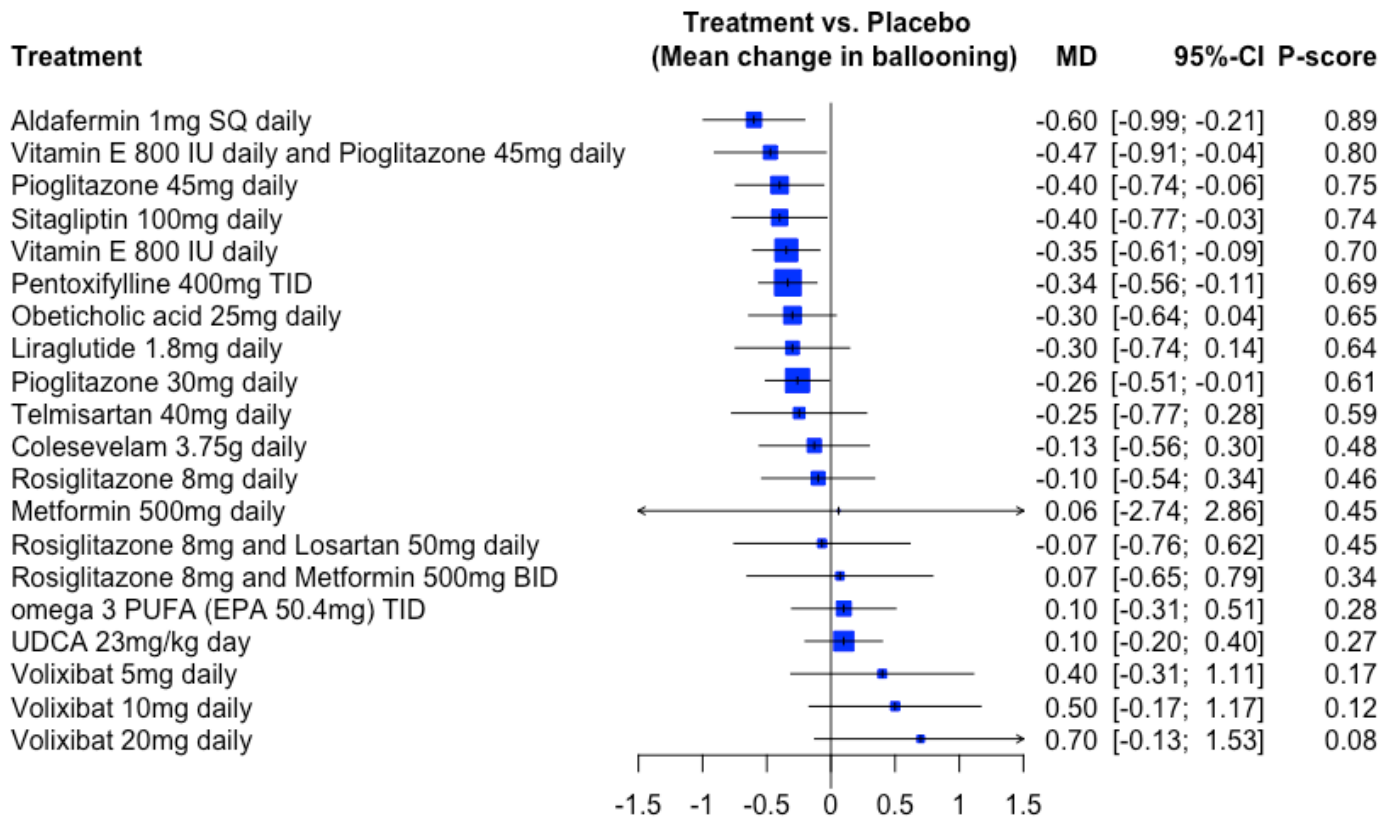

Forest plot for mean change in hepatocellular ballooning based on subgroup analysis after all patients with reported cirrhosis at baseline were excluded. All treatments are reported in comparison to placebo and sorted in order of relative treatment rank. Relative treatment rank is derived from the P-score, which ranges from 1 (best) to 0 (worst). In other words, a P-score closer to 1 indicates a greater probability of achieving the highest ranking, whereas a P-score approaching 0 would indicate a greater probability of achieving the worst ranking.

e-Figure 54: Mean change in fibrosis

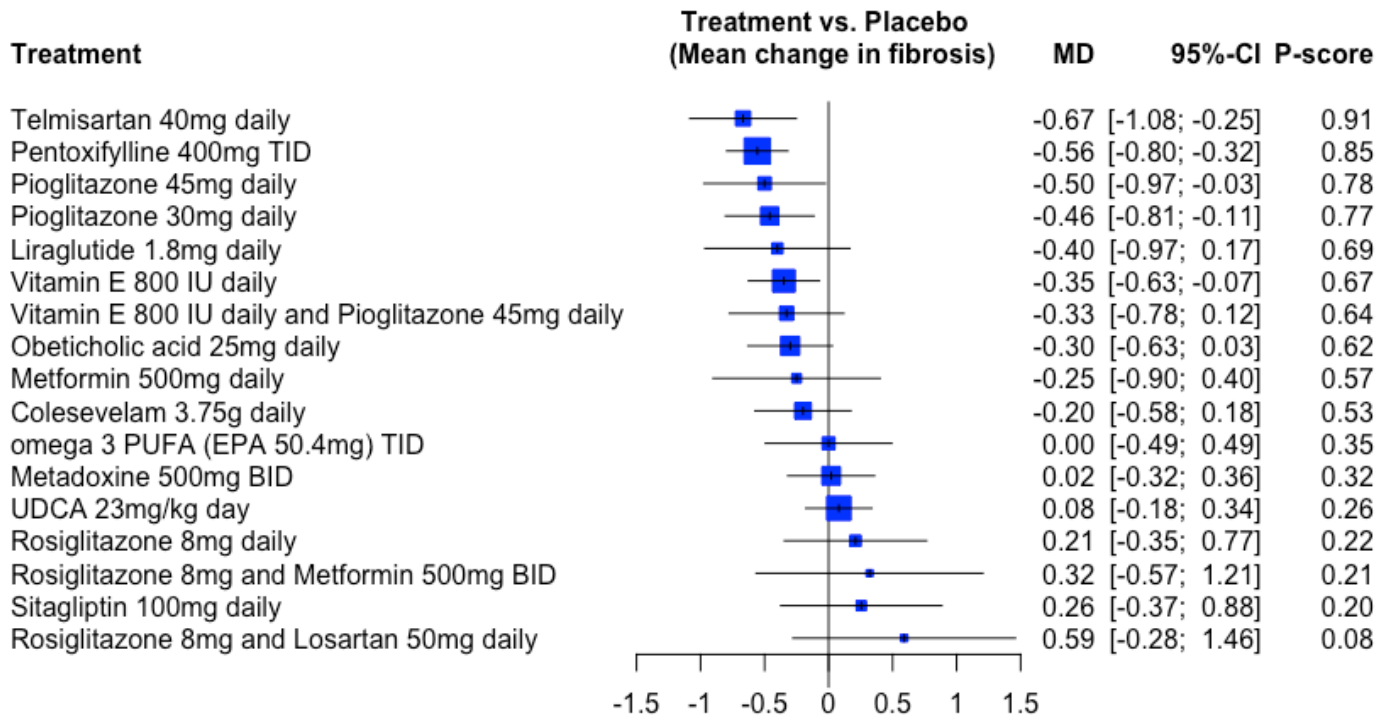

Forest plot for mean change in fibrosis based on subgroup analysis after all patients with reported cirrhosis at baseline were excluded. All treatments are reported in comparison to placebo and sorted in order of relative treatment rank. Relative treatment rank is derived from the P-score, which ranges from 1 (best) to 0 (worst). In other words, a P-score closer to 1 indicates a greater probability of achieving the highest ranking, whereas a P-score approaching 0 would indicate a greater probability of achieving the worst ranking.



## Appendix 14: NMA subgroup analysis after removal of clinical studies reporting all patients with diabetes mellitus at baseline

e-Figure 55:  $\geq 2$ -point decrease in NAFLD Activity Score [NAS]

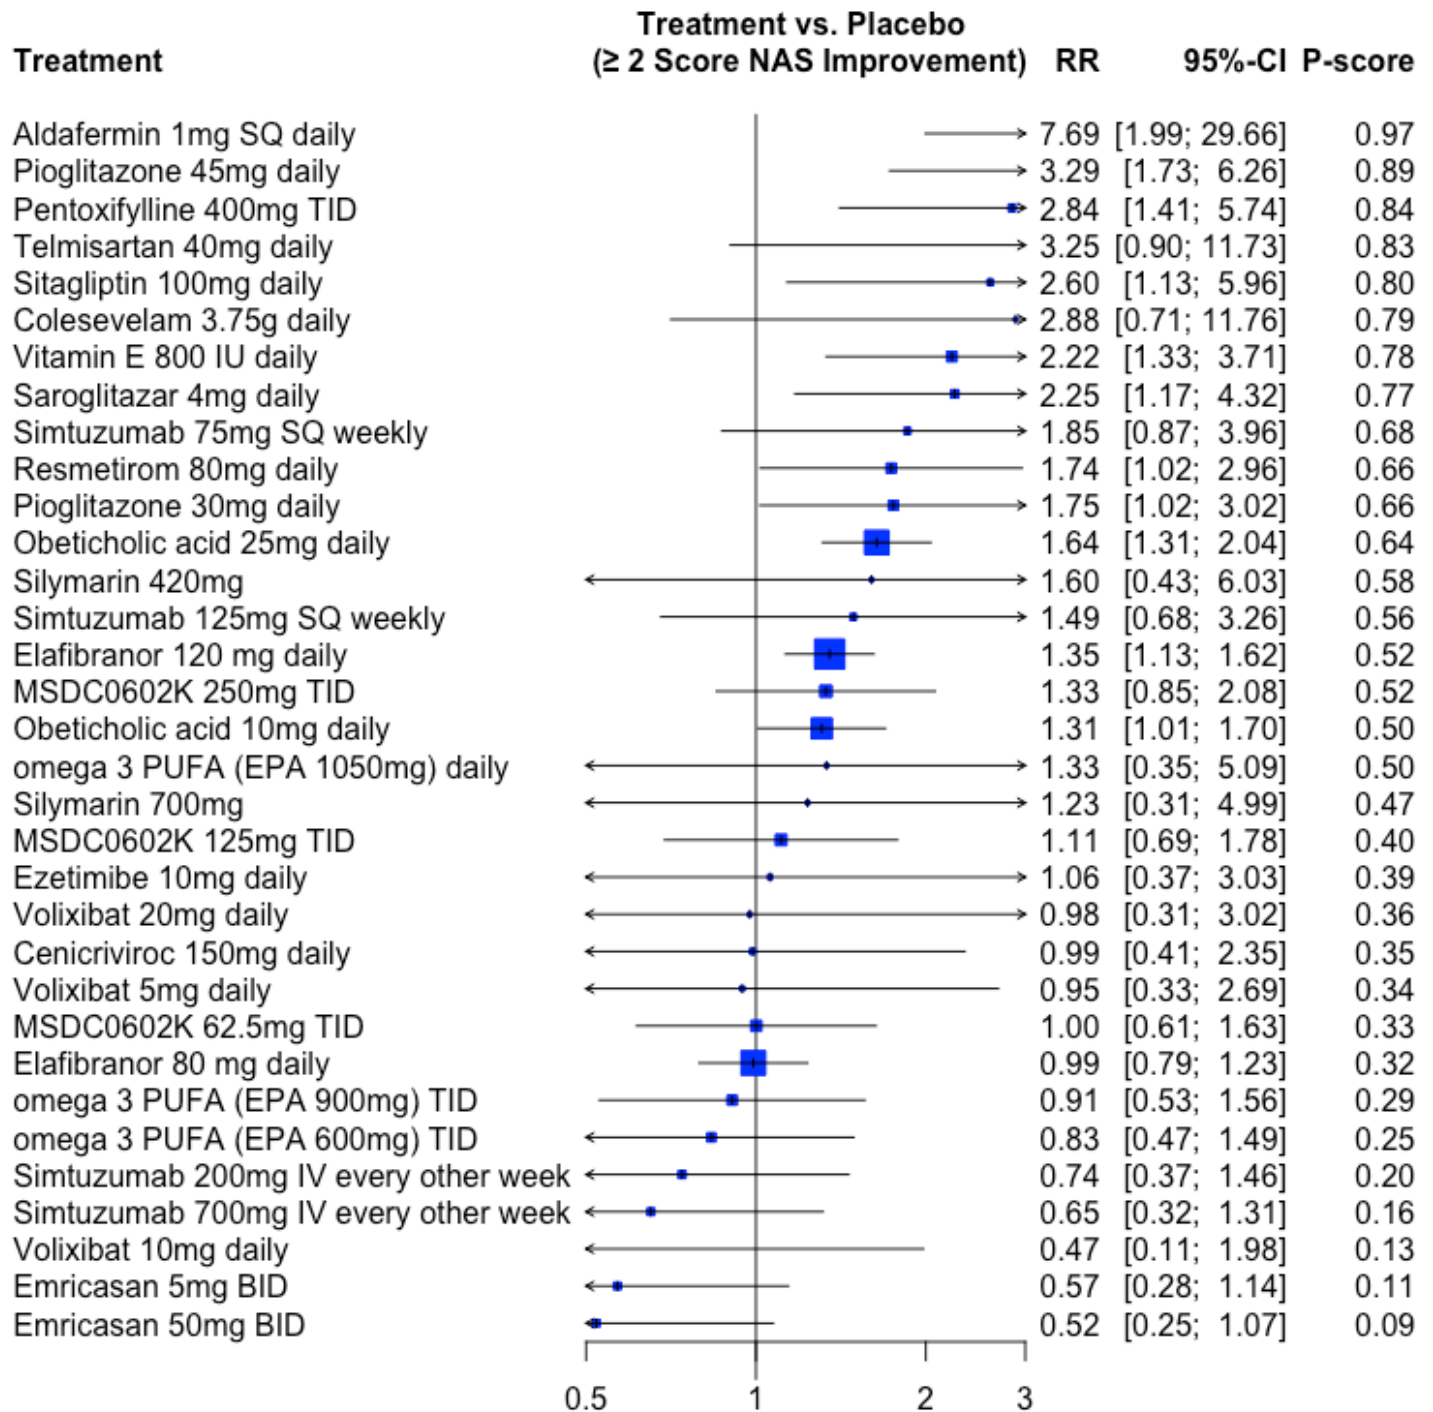

Forest plot for patients achieving  $\geq 2$ -point decrease in NAFLD Activity Score [NAS] based on subgroup analysis after all patients with reported diabetes mellitus at baseline were excluded. All treatments are reported in comparison to placebo and sorted in order of relative treatment rank. Relative treatment rank is derived from the P-score, which ranges from 1 (best) to 0 (worst). In other words, a P-score closer to 1 indicates a greater probability of achieving the highest ranking, whereas a P-score approaching 0 would indicate a greater probability of achieving the worst ranking.



e-Figure 56: NASH resolution without worsening fibrosis

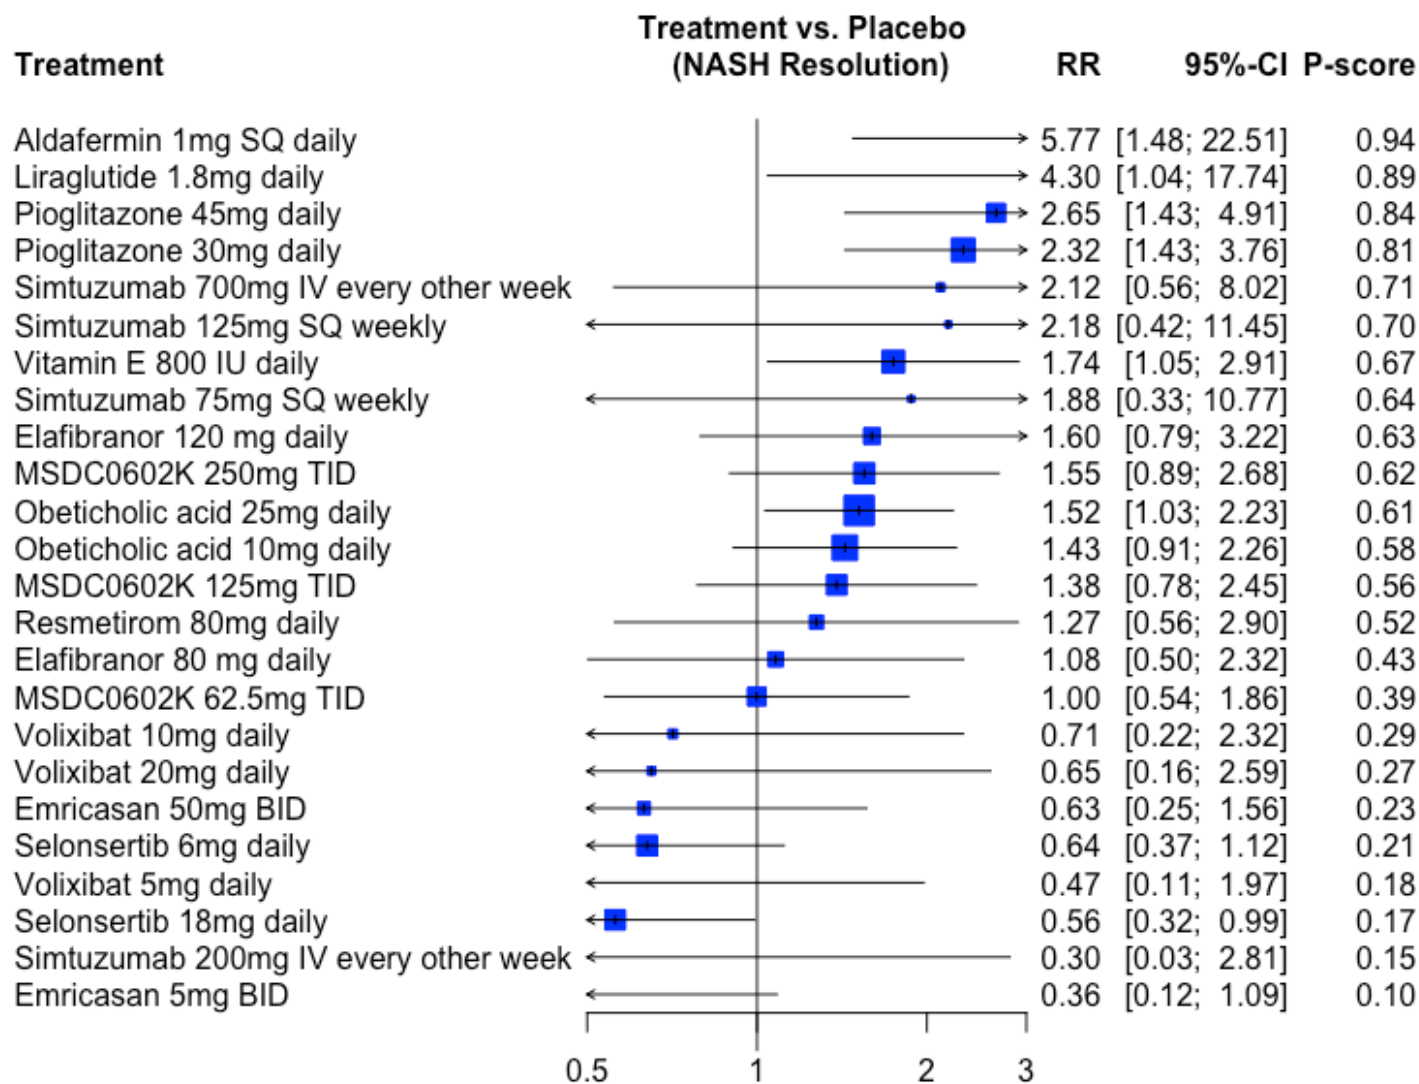

Forest plot for patients achieving NASH resolution without worsening fibrosis based on subgroup analysis after all patients with reported diabetes mellitus at baseline were excluded. All treatments are reported in comparison to placebo and sorted in order of relative treatment rank. Relative treatment rank is derived from the P-score, which ranges from 1 (best) to 0 (worst). In other words, a P-score closer to 1 indicates a greater probability of achieving the highest ranking, whereas a P-score approaching 0 would indicate a greater probability of achieving the worst ranking.

e-Figure 57: Fibrosis improvement without worsening NASH

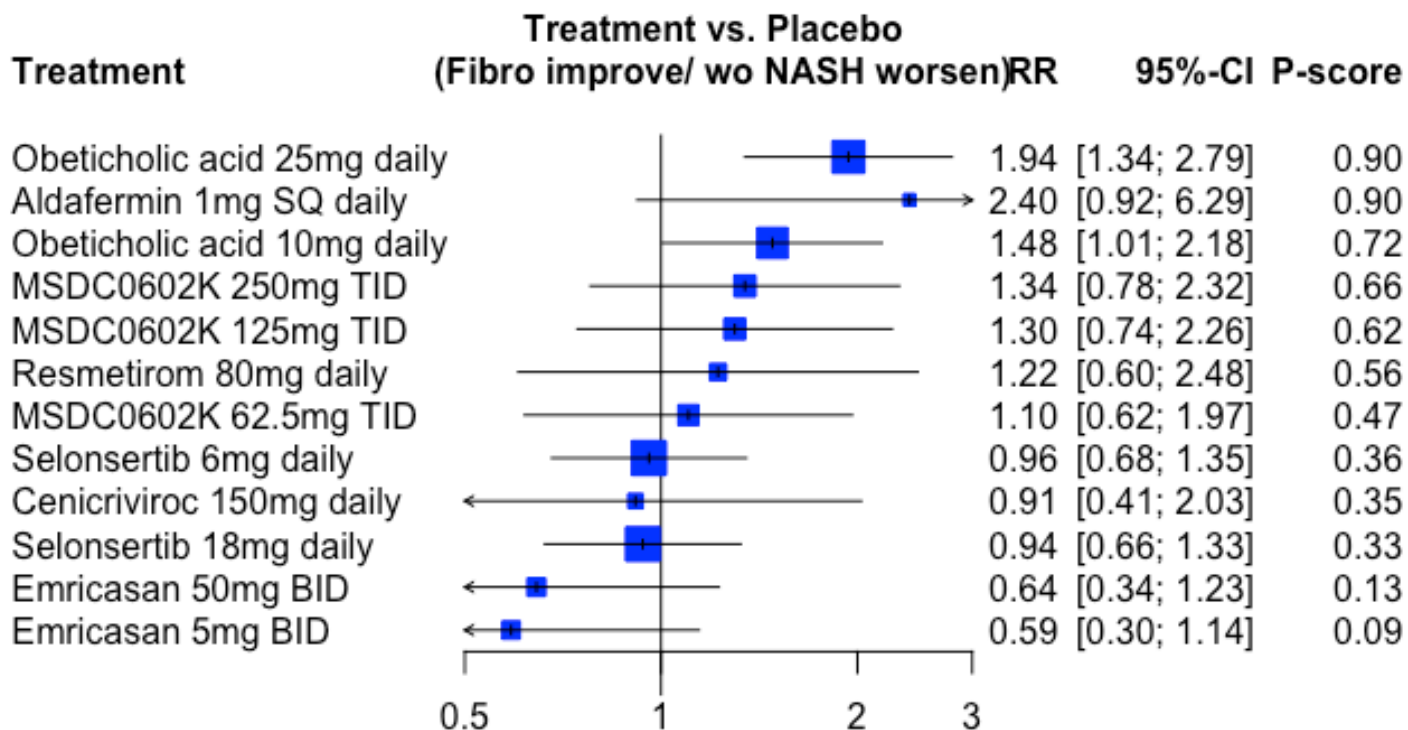

Forest plot for patients achieving improvement in fibrosis without worsening NASH based on subgroup analysis after all patients with reported diabetes mellitus at baseline were excluded. All treatments are reported in comparison to placebo and sorted in order of relative treatment rank. Relative treatment rank is derived from the P-score, which ranges from 1 (best) to 0 (worst). In other words, a P-score closer to 1 indicates a greater probability of achieving the highest ranking, whereas a P-score approaching 0 would indicate a greater probability of achieving the worst ranking.

e-Figure 58: Fibrosis improvement regardless of NASH progression

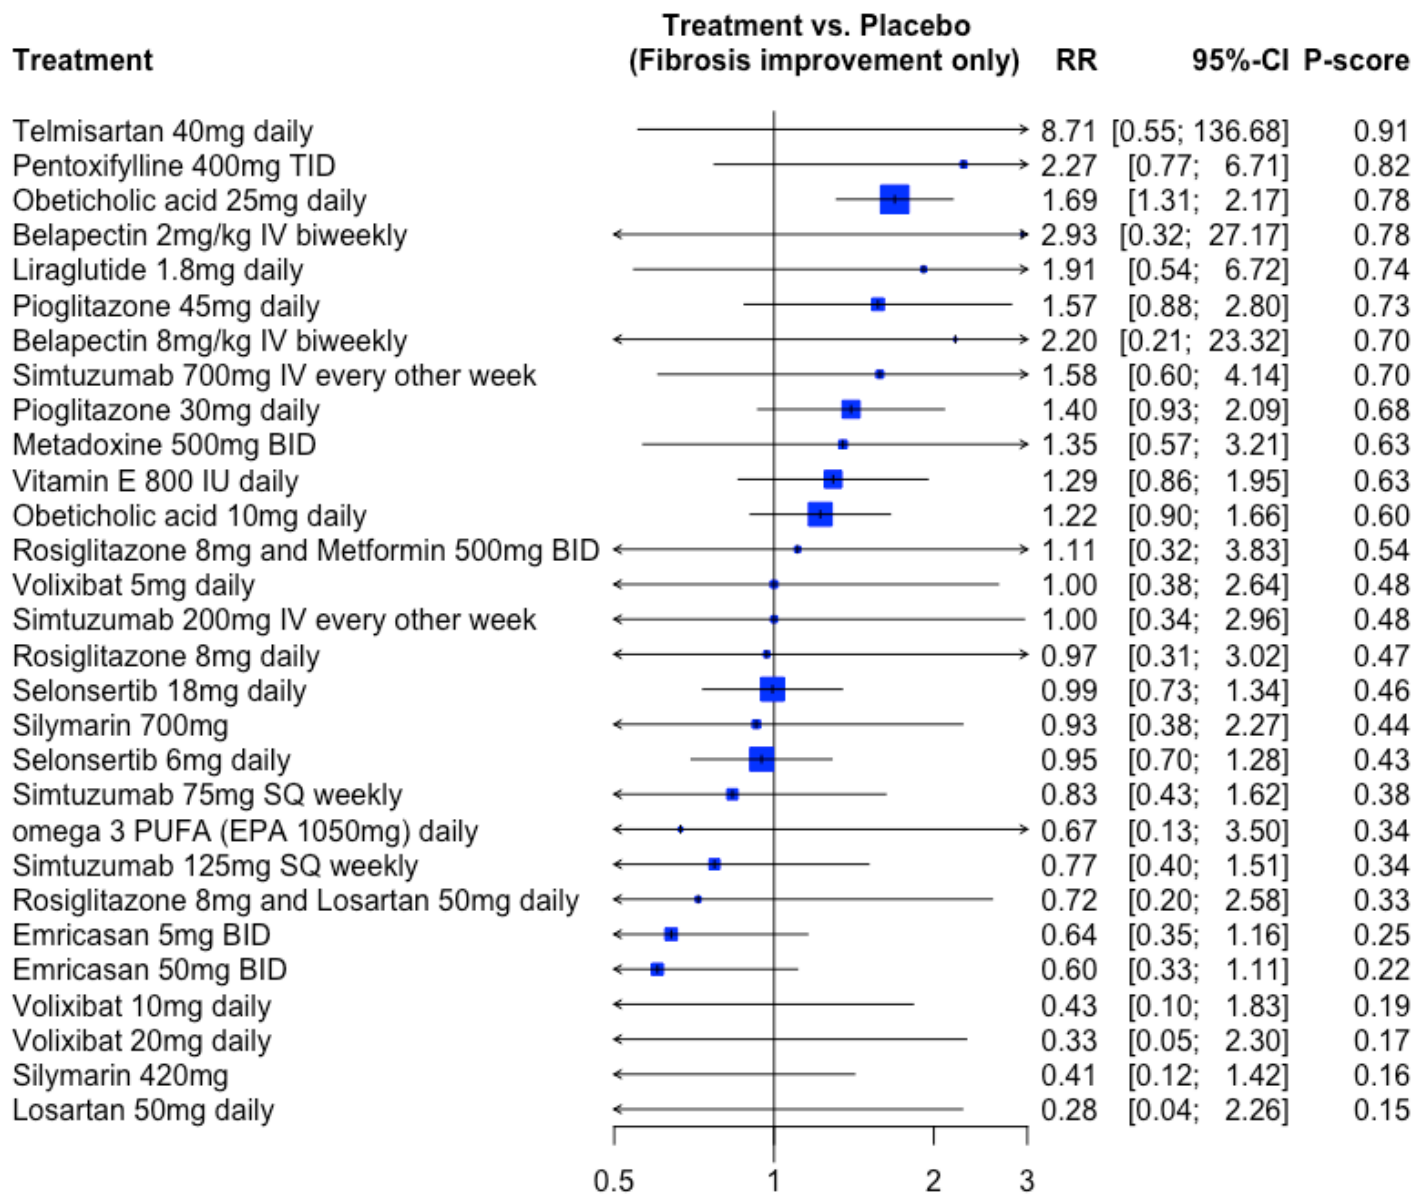

Forest plot for patients achieving improvement in fibrosis regardless of NASH progression based on subgroup analysis after all patients with reported diabetes mellitus at baseline were excluded. All treatments are reported in comparison to placebo and sorted in order of relative treatment rank. Relative treatment rank is derived from the P-score, which ranges from 1 (best) to 0 (worst). In other words, a P-score closer to 1 indicates a greater probability of achieving the highest ranking, whereas a P-score approaching 0 would indicate a greater probability of achieving the worst ranking.

e-Figure 59: Mean change in NAFLD Activity Score [NAS]

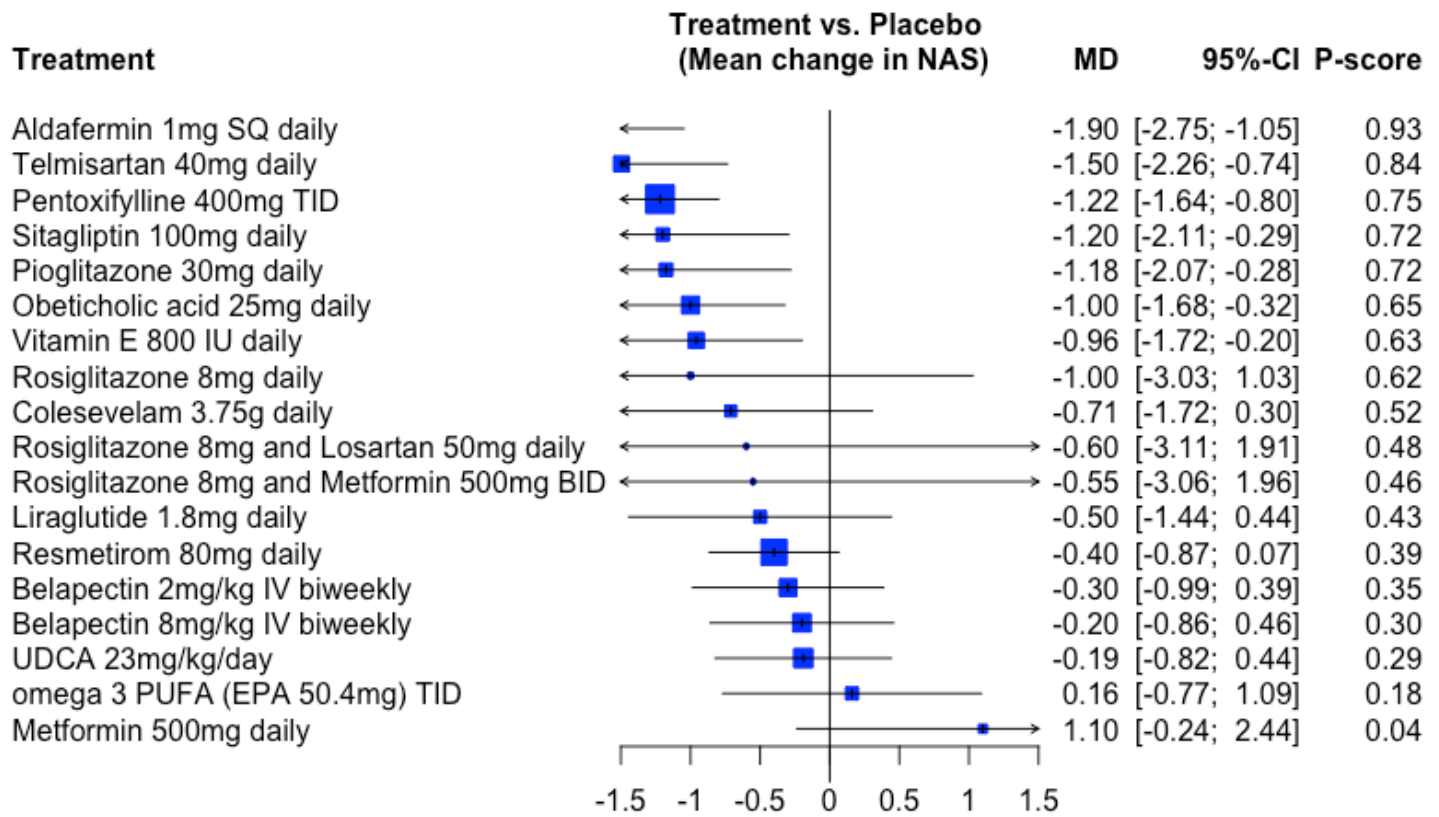

Forest plot for mean change in NAFLD Activity Score [NAS] based on subgroup analysis after all patients with reported diabetes mellitus at baseline were excluded. All treatments are reported in comparison to placebo and sorted in order of relative treatment rank. Relative treatment rank is derived from the P-score, which ranges from 1 (best) to 0 (worst). In other words, a P-score closer to 1 indicates a greater probability of achieving the highest ranking, whereas a P-score approaching 0 would indicate a greater probability of achieving the worst ranking.

e-Figure 60: Mean change in steatosis

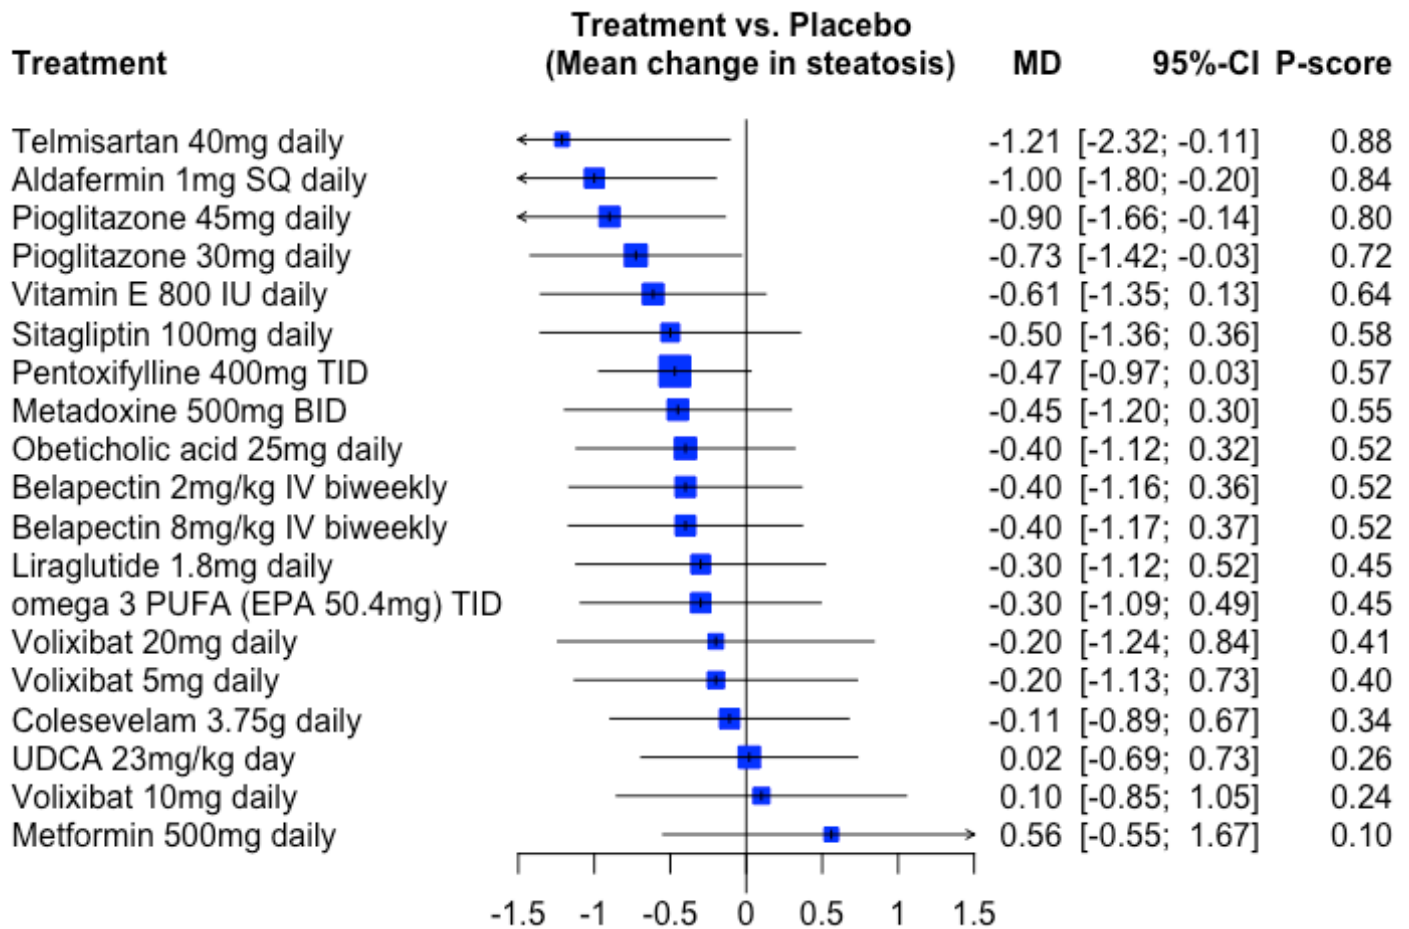

Forest plot for mean change in steatosis based on subgroup analysis after all patients with reported diabetes mellitus at baseline were excluded. All treatments are reported in comparison to placebo and sorted in order of relative treatment rank. Relative treatment rank is derived from the P-score, which ranges from 1 (best) to 0 (worst). In other words, a P-score closer to 1 indicates a greater probability of achieving the highest ranking, whereas a P-score approaching 0 would indicate a greater probability of achieving the worst ranking.

e-Figure 61: Mean change in lobular inflammation

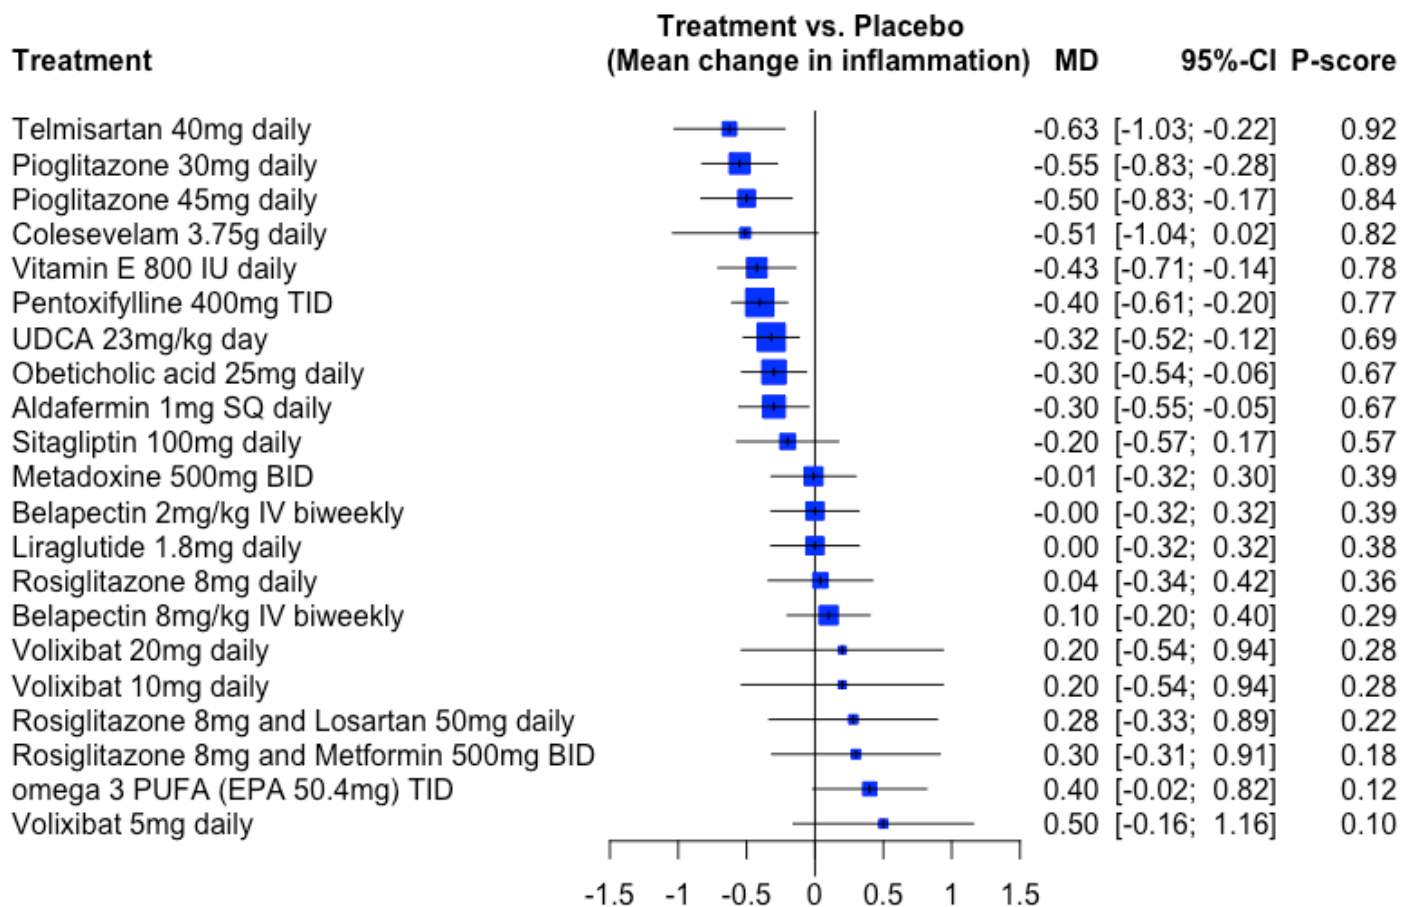

Forest plot for mean change in lobular inflammation based on subgroup analysis after all patients with reported diabetes mellitus at baseline were excluded. All treatments are reported in comparison to placebo and sorted in order of relative treatment rank. Relative treatment rank is derived from the P-score, which ranges from 1 (best) to 0 (worst). In other words, a P-score closer to 1 indicates a greater probability of achieving the highest ranking, whereas a P-score approaching 0 would indicate a greater probability of achieving the worst ranking.



e-Figure 62: Mean change in hepatocellular ballooning

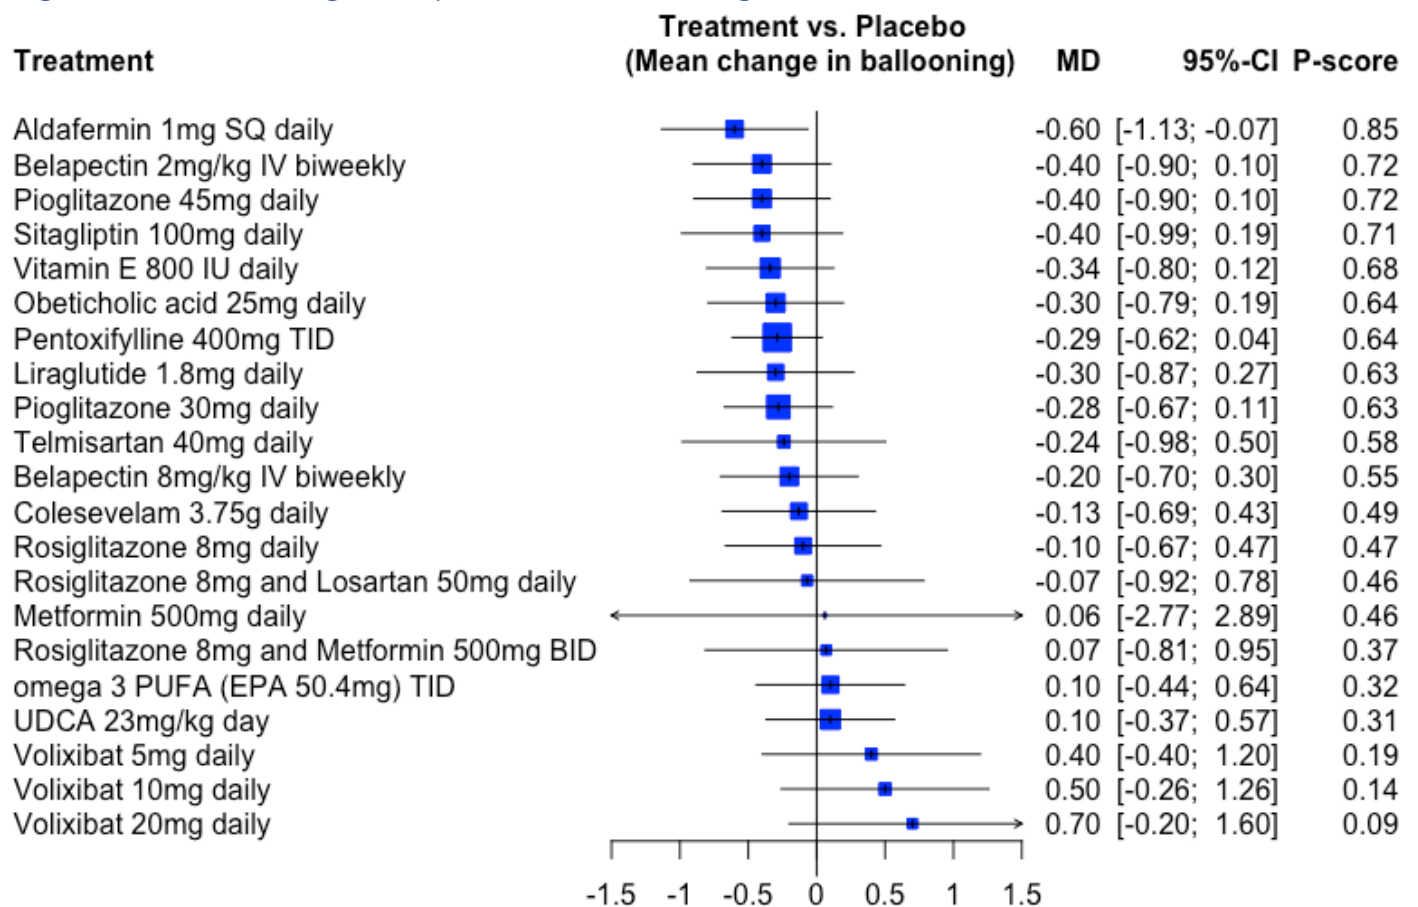

Forest plot for mean change in hepatocellular ballooning based on subgroup analysis after all patients with reported diabetes mellitus at baseline were excluded. All treatments are reported in comparison to placebo and sorted in order of relative treatment rank. Relative treatment rank is derived from the P-score, which ranges from 1 (best) to 0 (worst). In other words, a P-score closer to 1 indicates a greater probability of achieving the highest ranking, whereas a P-score approaching 0 would indicate a greater probability of achieving the worst ranking.



e-Figure 63: Mean change in fibrosis

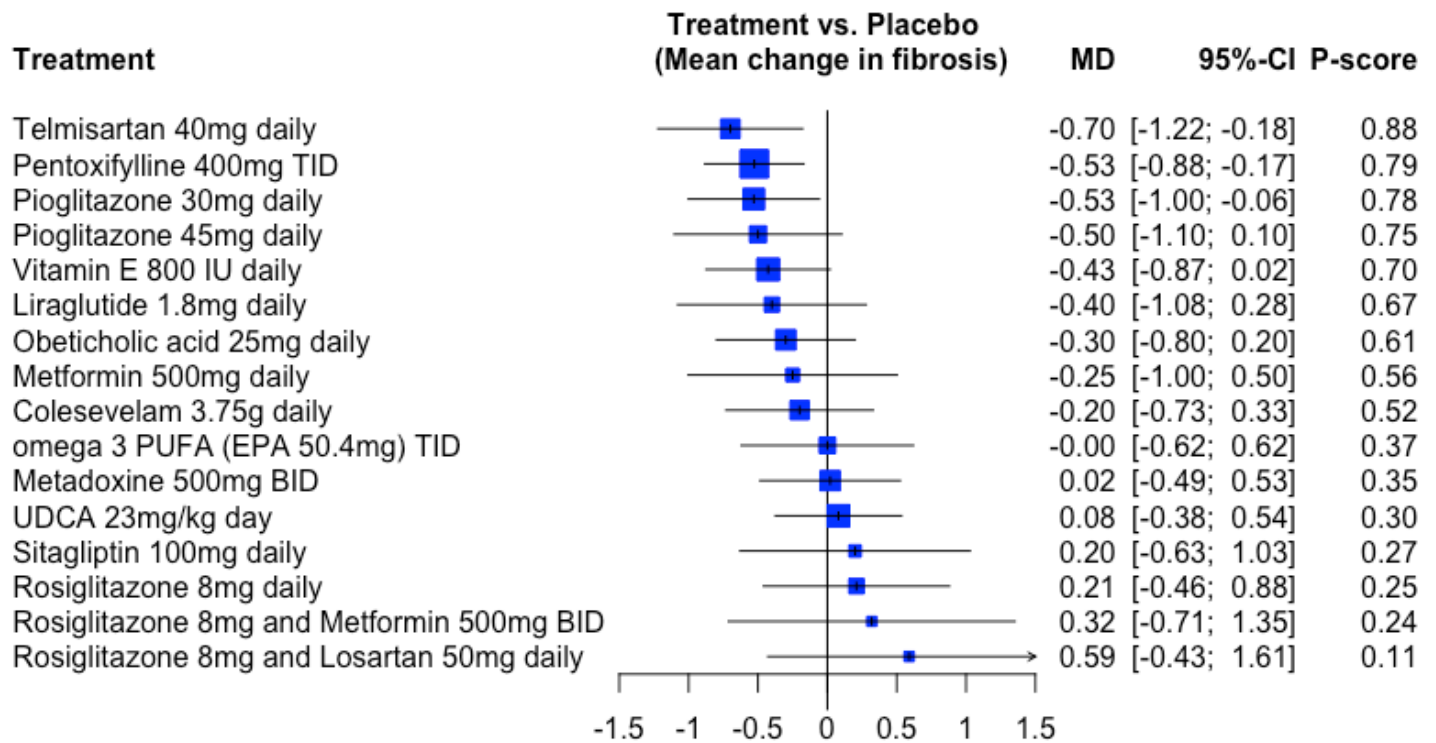

Forest plot for mean change in fibrosis based on subgroup analysis after all patients with reported diabetes mellitus at baseline were excluded. All treatments are reported in comparison to placebo and sorted in order of relative treatment rank. Relative treatment rank is derived from the P-score, which ranges from 1 (best) to 0 (worst). In other words, a P-score closer to 1 indicates a greater probability of achieving the highest ranking, whereas a P-score approaching 0 would indicate a greater probability of achieving the worst ranking.

## Appendix 15: NMA subgroup analysis after removal of clinical studies reporting length of treatment of six months or less

e-Figure 64:  $\geq 2$ -point decrease in NAFLD Activity Score [NAS]

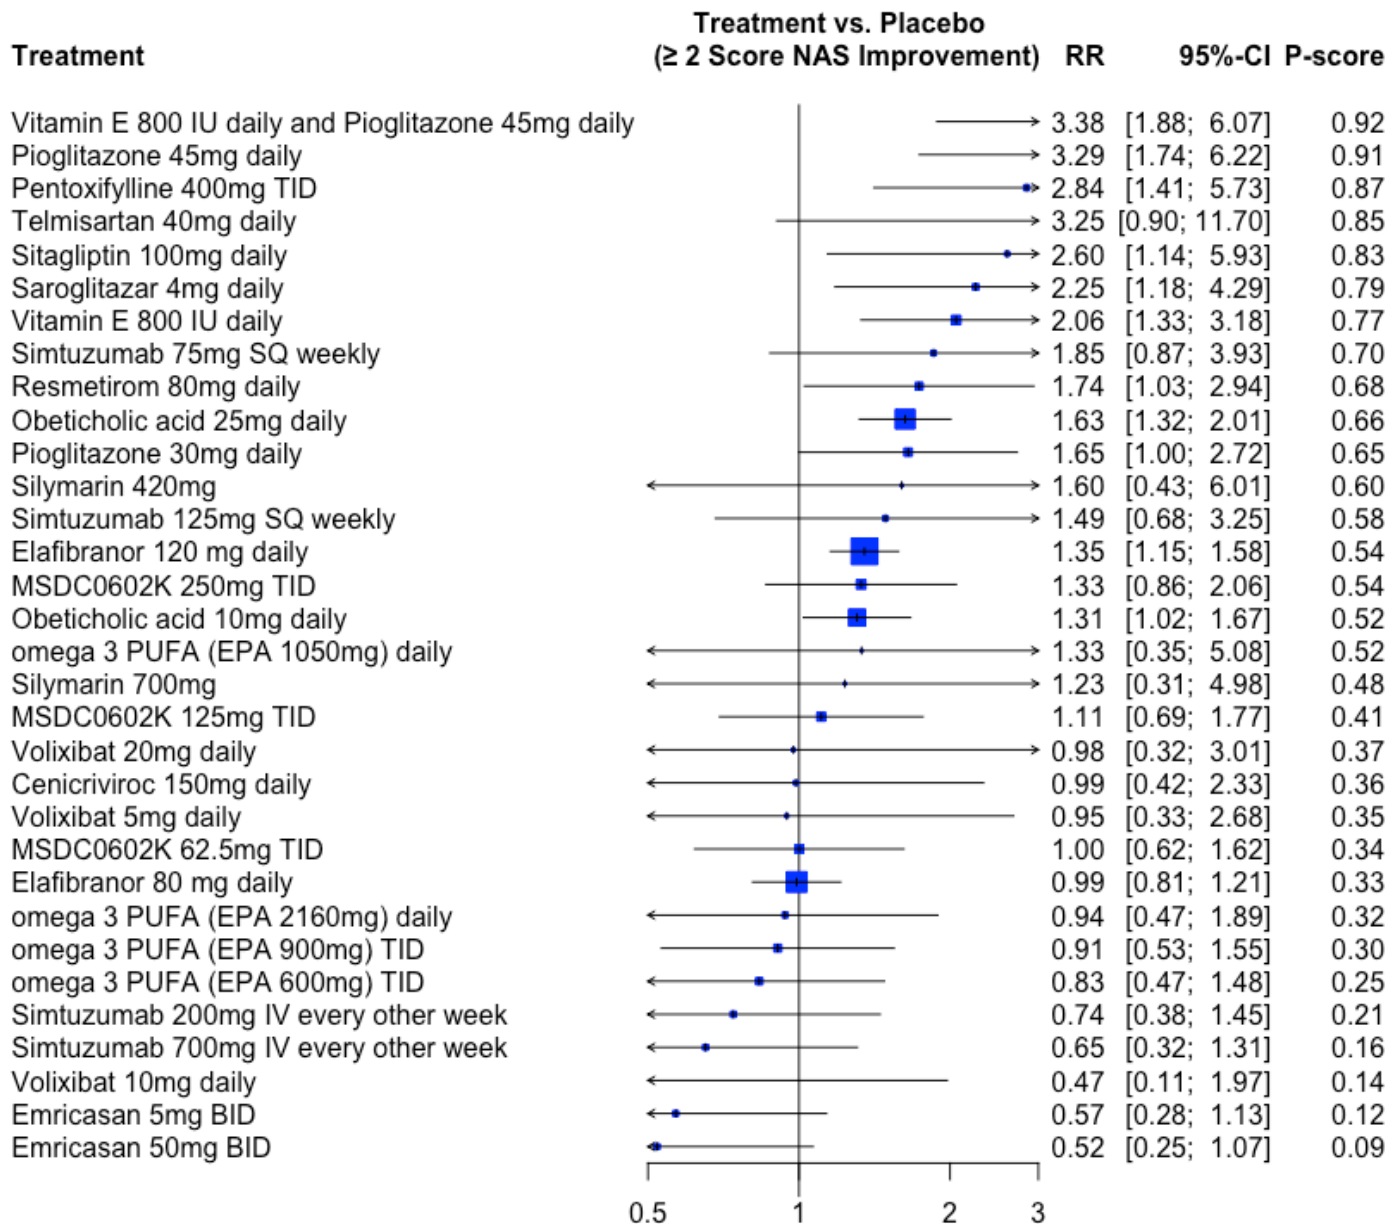

Forest plot for patients achieving  $\geq 2$ -point decrease in NAFLD Activity Score [NAS] based on subgroup analysis after excluding all patients with length of treatment reported at six months or less. All treatments are reported in comparison to placebo and sorted in order of relative treatment rank. Relative treatment rank is derived from the P-score, which ranges from 1 (best) to 0 (worst). In other words, a P-score closer to 1 indicates a greater probability of achieving the highest ranking, whereas a P-score approaching 0 would indicate a greater probability of achieving the worst ranking.

e-Figure 65: NASH resolution without worsening fibrosis

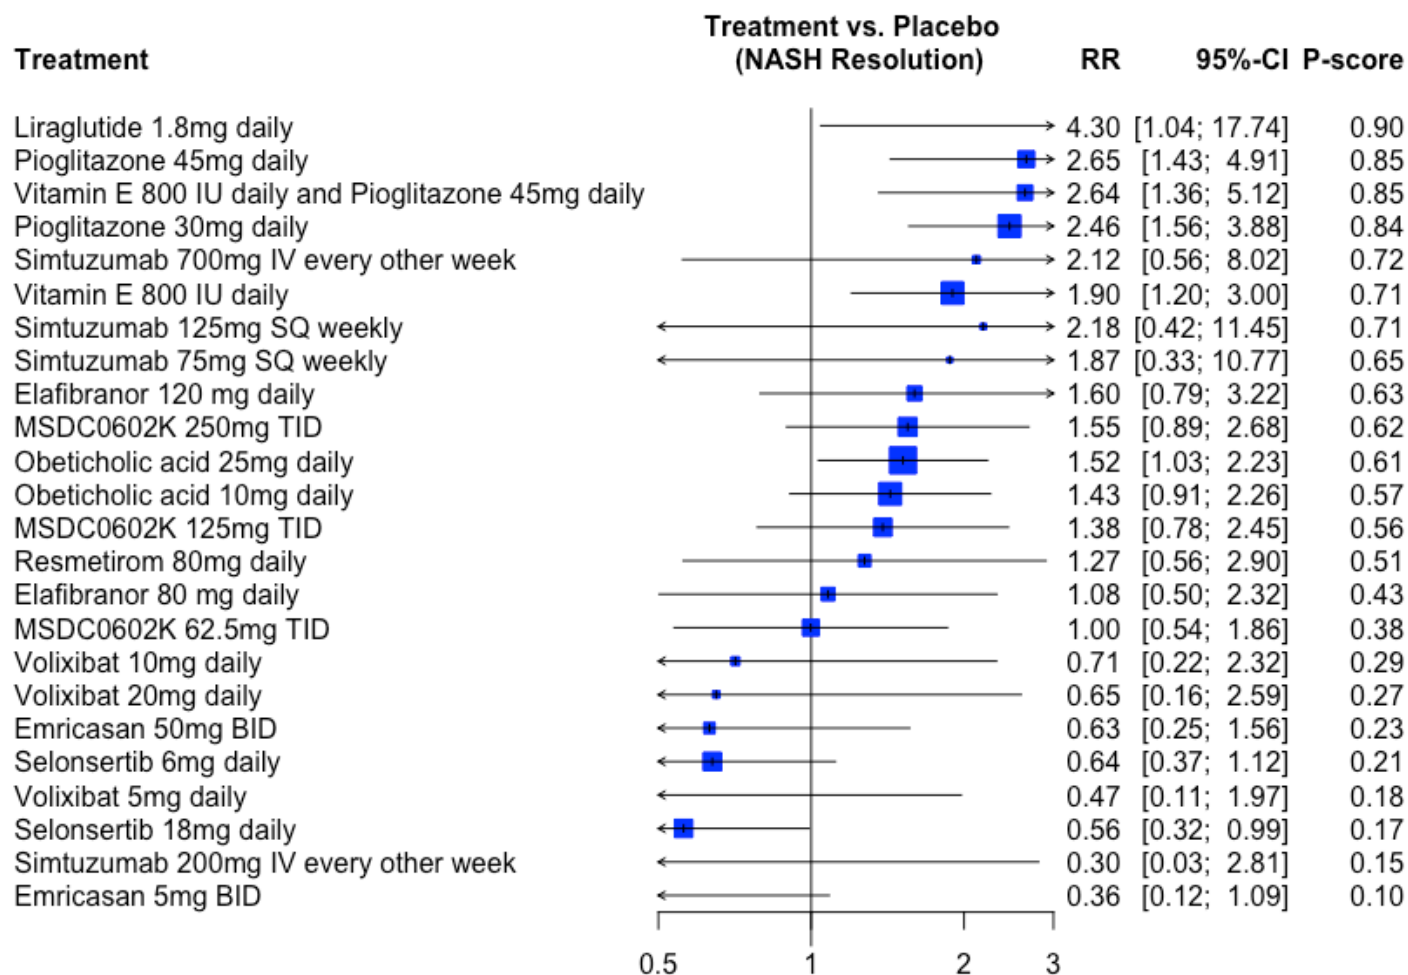

Forest plot for patients achieving NASH resolution without worsening fibrosis based on subgroup analysis after excluding all patients with length of treatment reported at six months or less. All treatments are reported in comparison to placebo and sorted in order of relative treatment rank. Relative treatment rank is derived from the P-score, which ranges from 1 (best) to 0 (worst). In other words, a P-score closer to 1 indicates a greater probability of achieving the highest ranking, whereas a P-score approaching 0 would indicate a greater probability of achieving the worst ranking.

e-Figure 66: Fibrosis improvement without worsening NASH

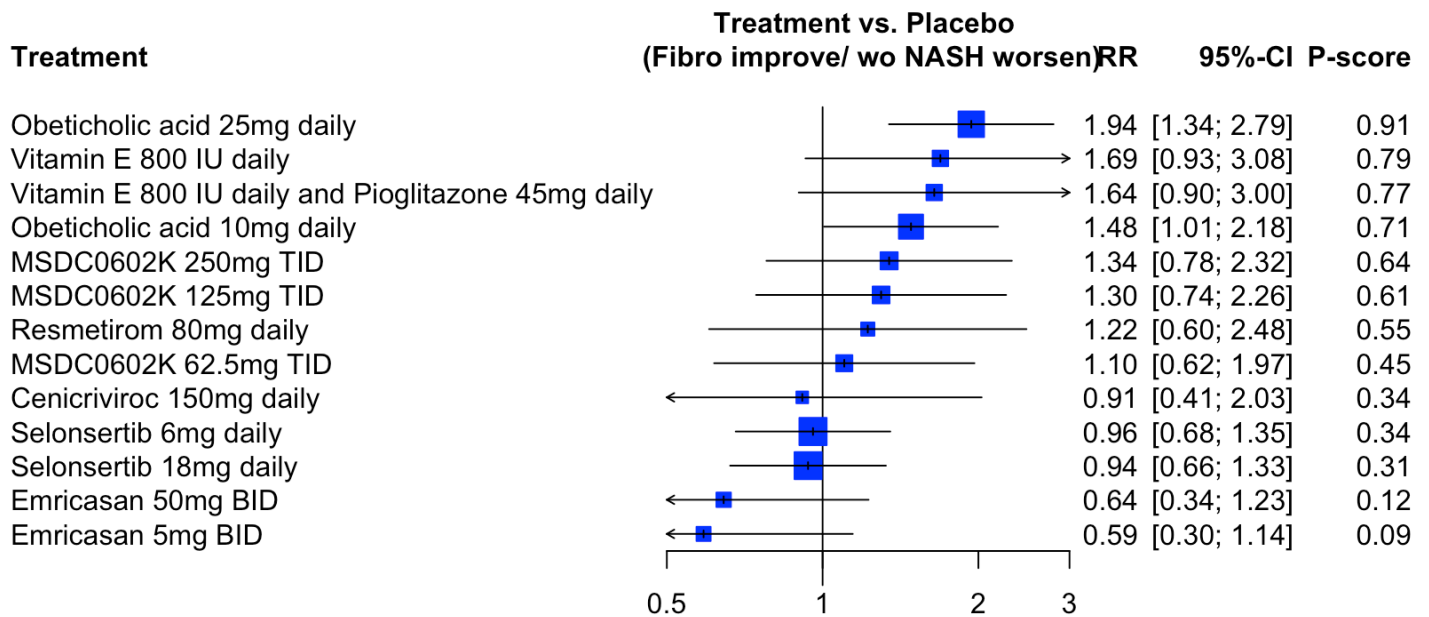

Forest plot for patients achieving improvement in fibrosis without worsening NASH based on subgroup analysis after excluding all patients with length of treatment reported at six months or less. All treatments are reported in comparison to placebo and sorted in order of relative treatment rank. Relative treatment rank is derived from the P-score, which ranges from 1 (best) to 0 (worst). In other words, a P-score closer to 1 indicates a greater probability of achieving the highest ranking, whereas a P-score approaching 0 would indicate a greater probability of achieving the worst ranking.

e-Figure 67: Fibrosis improvement regardless of NASH progression

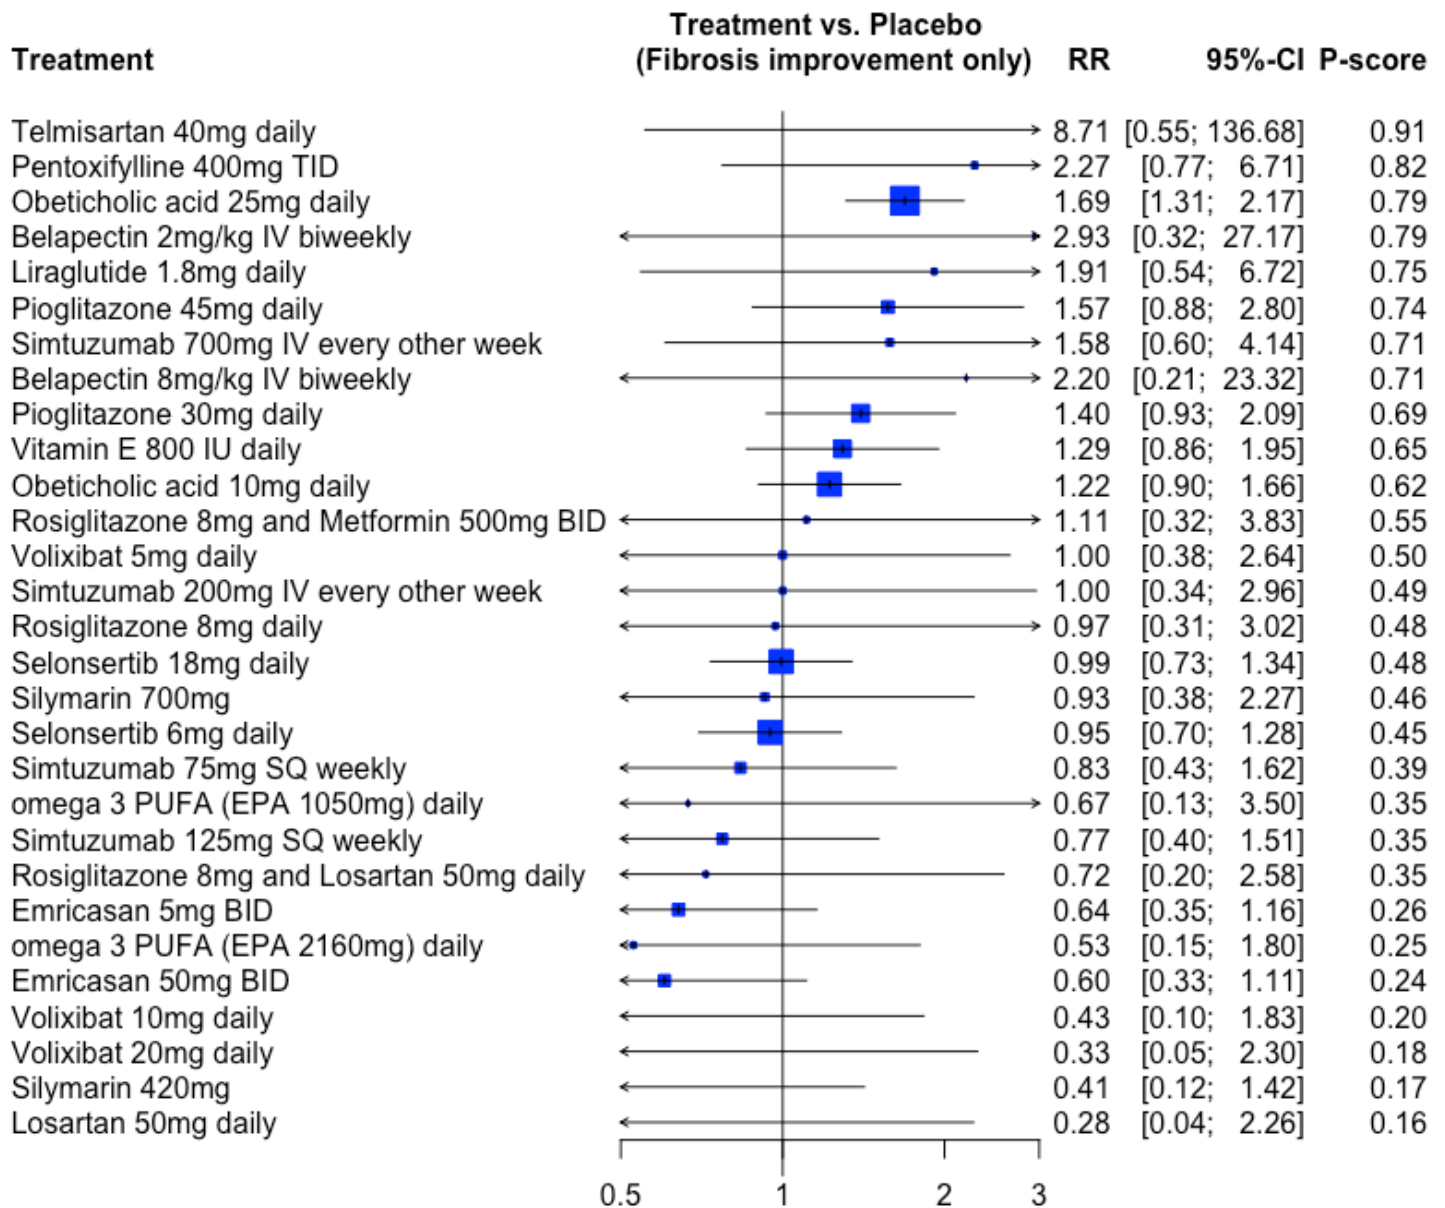

Forest plot for patients achieving improvement in fibrosis regardless of NASH progression based on subgroup analysis after excluding all patients with length of treatment reported at six months or less. All treatments are reported in comparison to placebo and sorted in order of relative treatment rank. Relative treatment rank is derived from the P-score, which ranges from 1 (best) to 0 (worst). In other words, a P-score closer to 1 indicates a greater probability of achieving the highest ranking, whereas a P-score approaching 0 would indicate a greater probability of achieving the worst ranking.

e-Figure 68: Mean change in NAFLD Activity Score [NAS]

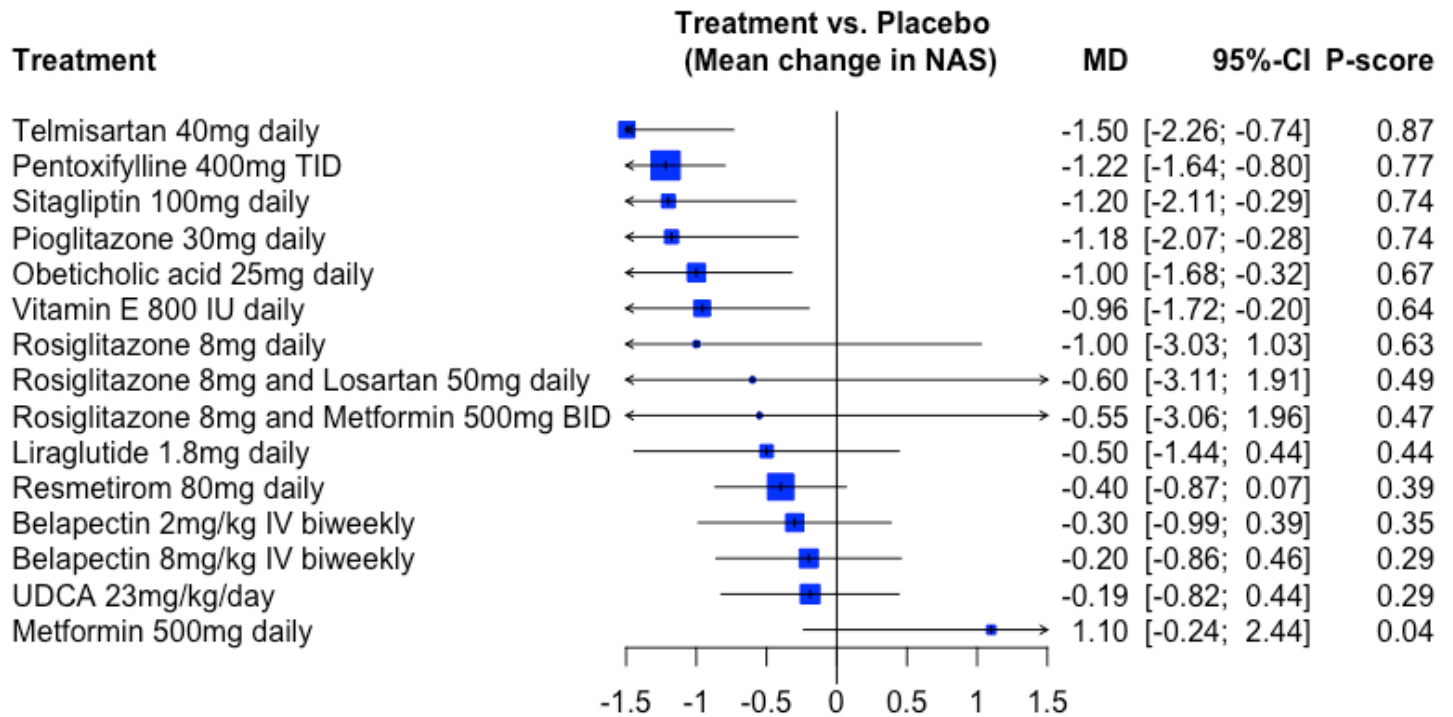

Forest plot for mean change in NAFLD Activity Score [NAS] based on subgroup analysis after excluding all patients with length of treatment reported at six months or less. All treatments are reported in comparison to placebo and sorted in order of relative treatment rank. Relative treatment rank is derived from the P-score, which ranges from 1 (best) to 0 (worst). In other words, a P-score closer to 1 indicates a greater probability of achieving the highest ranking, whereas a P-score approaching 0 would indicate a greater probability of achieving the worst ranking.



e-Figure 69: Mean change in steatosis

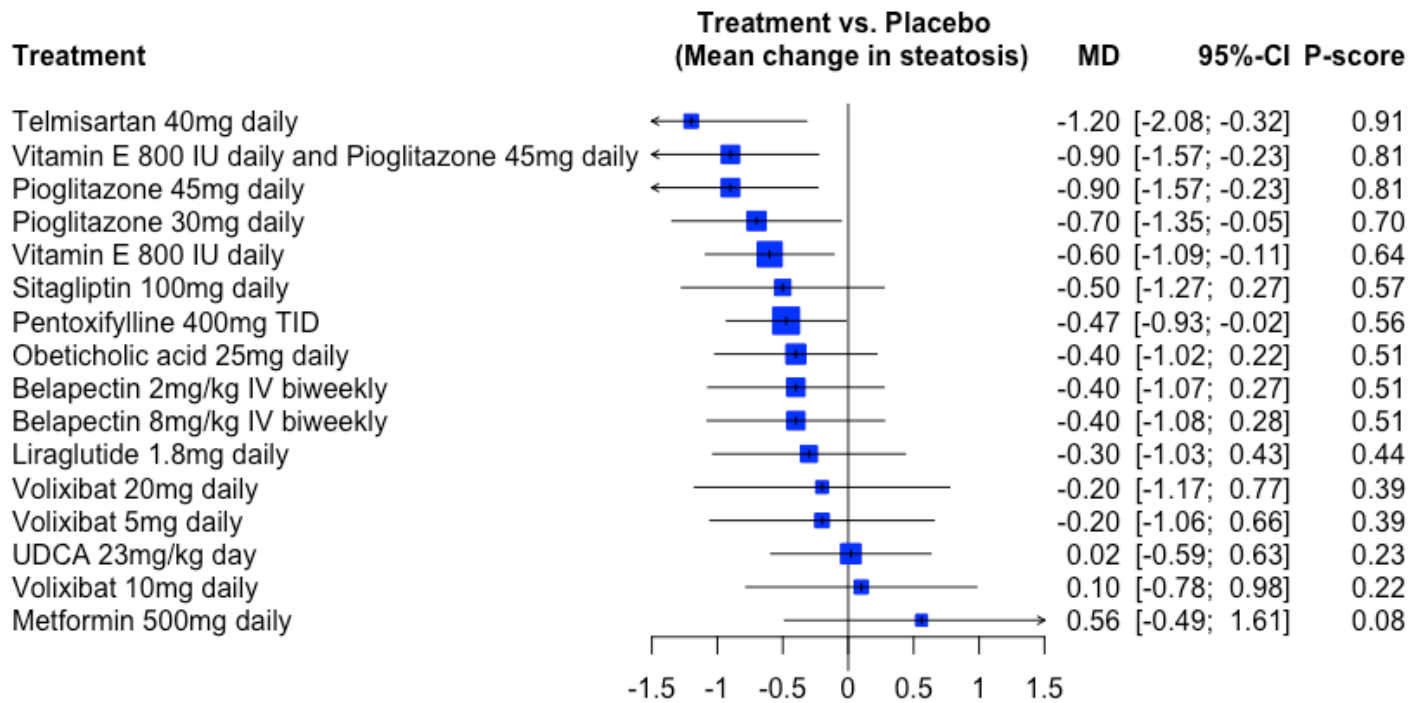

Forest plot for mean change in steatosis based on subgroup analysis after excluding all patients with length of treatment reported at six months or less. All treatments are reported in comparison to placebo and sorted in order of relative treatment rank. Relative treatment rank is derived from the P-score, which ranges from 1 (best) to 0 (worst). In other words, a P-score closer to 1 indicates a greater probability of achieving the highest ranking, whereas a P-score approaching 0 would indicate a greater probability of achieving the worst ranking.



e-Figure 70: Mean change in lobular inflammation

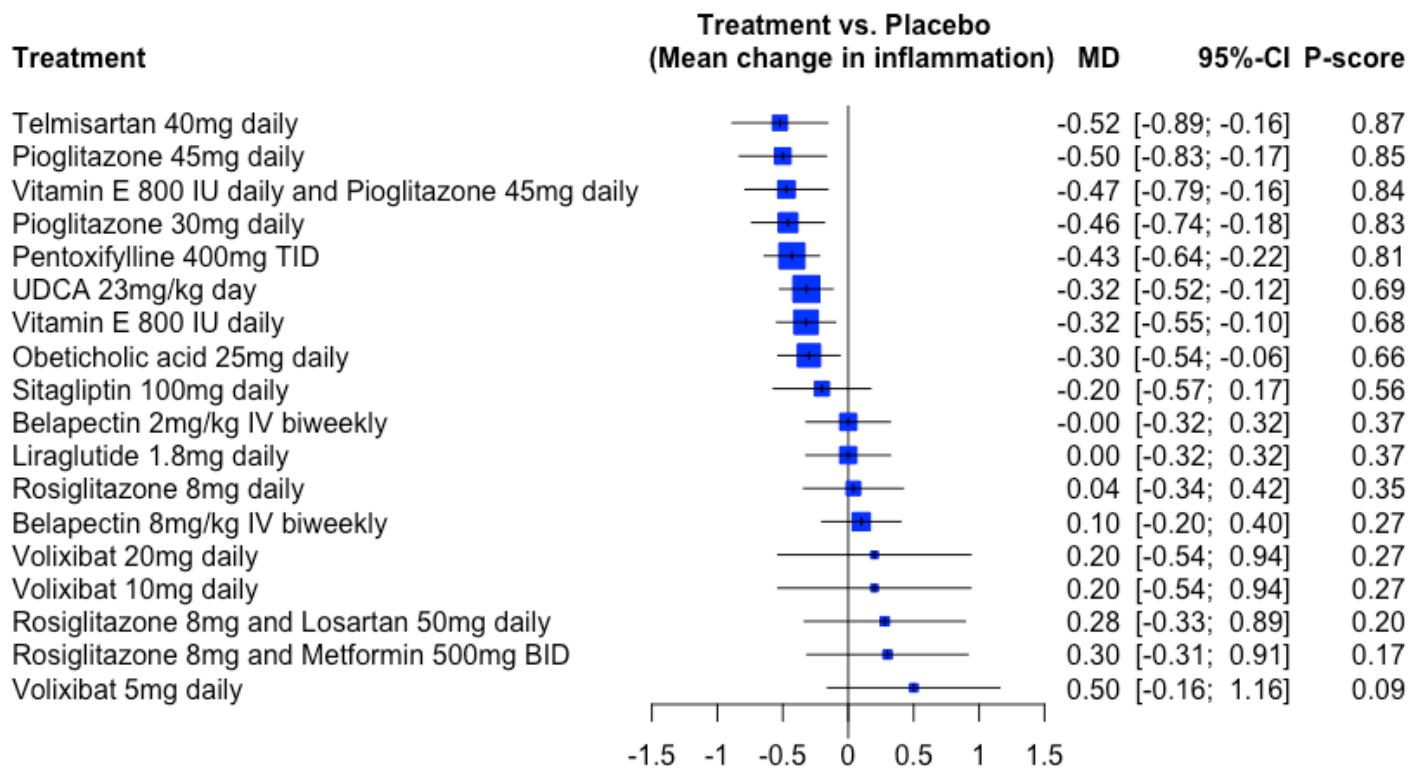

Forest plot for mean change in lobular inflammation based on subgroup analysis after excluding all patients with length of treatment reported at six months or less. All treatments are reported in comparison to placebo and sorted in order of relative treatment rank. Relative treatment rank is derived from the P-score, which ranges from 1 (best) to 0 (worst). In other words, a P-score closer to 1 indicates a greater probability of achieving the highest ranking, whereas a P-score approaching 0 would indicate a greater probability of achieving the worst ranking.

e-Figure 71: Mean change in hepatocellular ballooning

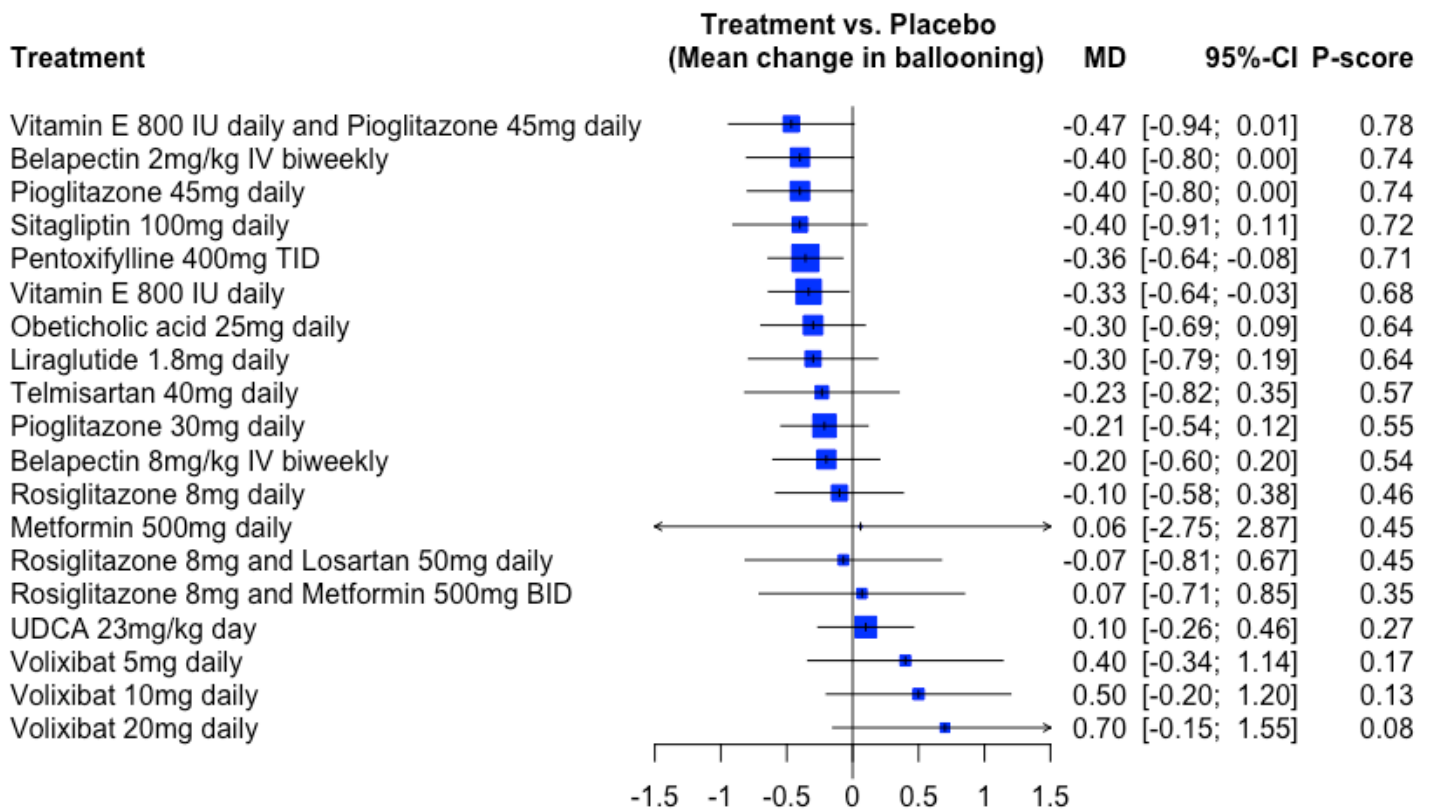

Forest plot for mean change in hepatocellular ballooning based on subgroup analysis after excluding all patients with length of treatment reported at six months or less. All treatments are reported in comparison to placebo and sorted in order of relative treatment rank. Relative treatment rank is derived from the P-score, which ranges from 1 (best) to 0 (worst). In other words, a P-score closer to 1 indicates a greater probability of achieving the highest ranking, whereas a P-score approaching 0 would indicate a greater probability of achieving the worst ranking.

e-Figure 72: Mean change in fibrosis

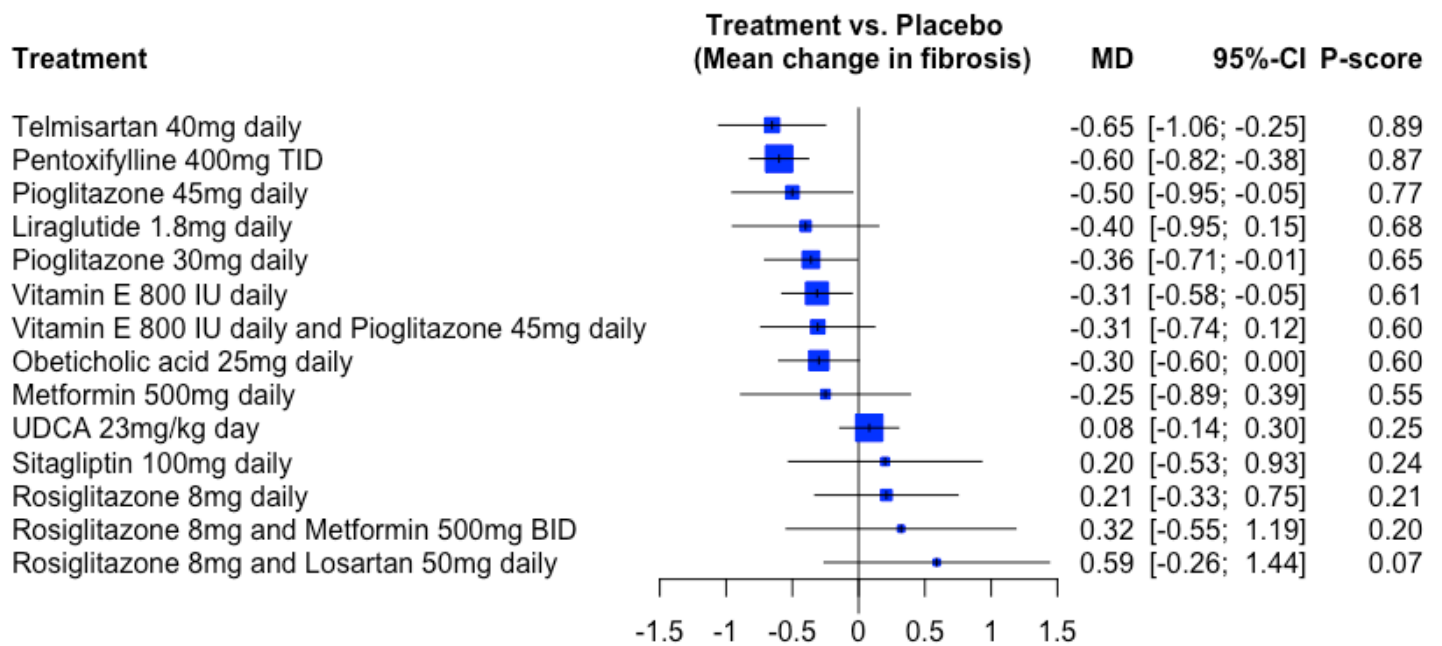

Forest plot for mean change in fibrosis based on subgroup analysis after excluding all patients with length of treatment reported at six months or less. All treatments are reported in comparison to placebo and sorted in order of relative treatment rank. Relative treatment rank is derived from the P-score, which ranges from 1 (best) to 0 (worst). In other words, a P-score closer to 1 indicates a greater probability of achieving the highest ranking, whereas a P-score approaching 0 would indicate a greater probability of achieving the worst ranking.

## Appendix 16: PRISMA checklist for reporting a systematic review and network meta-analysis

| Section/Topic             | Item # | Checklist Item                                                                                                                                                                                                                                                                                                                                                                                                                                                                                                                                                                                                                                                                                                                                                                          | Reported on Page # |
|---------------------------|--------|-----------------------------------------------------------------------------------------------------------------------------------------------------------------------------------------------------------------------------------------------------------------------------------------------------------------------------------------------------------------------------------------------------------------------------------------------------------------------------------------------------------------------------------------------------------------------------------------------------------------------------------------------------------------------------------------------------------------------------------------------------------------------------------------|--------------------|
| <b>TITLE</b>              |        |                                                                                                                                                                                                                                                                                                                                                                                                                                                                                                                                                                                                                                                                                                                                                                                         |                    |
| Title                     | 1      | Identify the report as a systematic review <i>incorporating a network meta-analysis (or related form of meta-analysis)</i> .                                                                                                                                                                                                                                                                                                                                                                                                                                                                                                                                                                                                                                                            | 1                  |
| <b>ABSTRACT</b>           |        |                                                                                                                                                                                                                                                                                                                                                                                                                                                                                                                                                                                                                                                                                                                                                                                         |                    |
| Structured summary        | 2      | Provide a structured summary including, as applicable:<br><b>Background:</b> main objectives<br><b>Methods:</b> data sources; study eligibility criteria, participants, and interventions; study appraisal; and <i>synthesis methods, such as network meta-analysis</i> .<br><b>Results:</b> number of studies and participants identified; summary estimates with corresponding confidence/credible intervals; <i>treatment rankings may also be discussed. Authors may choose to summarize pairwise comparisons against a chosen treatment included in their analyses for brevity.</i><br><b>Discussion/Conclusions:</b> limitations; conclusions and implications of findings.<br><b>Other:</b> primary source of funding; systematic review registration number with registry name. | 2                  |
| <b>INTRODUCTION</b>       |        |                                                                                                                                                                                                                                                                                                                                                                                                                                                                                                                                                                                                                                                                                                                                                                                         |                    |
| Rationale                 | 3      | Describe the rationale for the review in the context of what is already known, <i>including mention of why a network meta-analysis has been conducted</i> .                                                                                                                                                                                                                                                                                                                                                                                                                                                                                                                                                                                                                             | 4                  |
| Objectives                | 4      | Provide an explicit statement of questions being addressed, with reference to participants, interventions, comparisons, outcomes, and study design (PICOS).                                                                                                                                                                                                                                                                                                                                                                                                                                                                                                                                                                                                                             | 4                  |
| <b>METHODS</b>            |        |                                                                                                                                                                                                                                                                                                                                                                                                                                                                                                                                                                                                                                                                                                                                                                                         |                    |
| Protocol and registration | 5      | Indicate whether a review protocol exists and if and where it can be accessed (e.g., Web address); and, if available, provide registration information, including registration number.                                                                                                                                                                                                                                                                                                                                                                                                                                                                                                                                                                                                  | n/a                |
| Eligibility criteria      | 6      | Specify study characteristics (e.g., PICOS, length of follow-up) and report characteristics (e.g., years considered, language, publication status) used as criteria for eligibility, giving rationale. <i>Clearly describe eligible treatments included in the treatment network, and note whether any have been clustered or merged into the same node (with justification)</i> .                                                                                                                                                                                                                                                                                                                                                                                                      | 5-6;<br>Appendix 2 |
| Information sources       | 7      | Describe all information sources (e.g., databases with dates of coverage, contact with study authors to identify additional studies) in the search and date last searched.                                                                                                                                                                                                                                                                                                                                                                                                                                                                                                                                                                                                              | 5                  |
| Search                    | 8      | Present full electronic search strategy for at least one database, including any limits used, such that it could be repeated.                                                                                                                                                                                                                                                                                                                                                                                                                                                                                                                                                                                                                                                           | 5                  |
| Study selection           | 9      | State the process for selecting studies (i.e., screening, eligibility, included in systematic review, and, if applicable, included in the meta-analysis).                                                                                                                                                                                                                                                                                                                                                                                                                                                                                                                                                                                                                               | 5-7                |
| Data collection           | 10     | Describe method of data extraction from reports (e.g., piloted forms, independently, in duplicate) and any processes for obtaining and confirming                                                                                                                                                                                                                                                                                                                                                                                                                                                                                                                                                                                                                                       | 5-7                |

|                                          |           |                                                                                                                                                                                                                                                                                                                                                                                                                                                   |                                 |
|------------------------------------------|-----------|---------------------------------------------------------------------------------------------------------------------------------------------------------------------------------------------------------------------------------------------------------------------------------------------------------------------------------------------------------------------------------------------------------------------------------------------------|---------------------------------|
| process                                  |           | data from investigators.                                                                                                                                                                                                                                                                                                                                                                                                                          |                                 |
| Data items                               | 11        | List and define all variables for which data were sought (e.g., PICOS, funding sources) and any assumptions and simplifications made.                                                                                                                                                                                                                                                                                                             | 6-7                             |
| <b>Geometry of the network</b>           | <b>S1</b> | Describe methods used to explore the geometry of the treatment network under study and potential biases related to it. This should include how the evidence base has been graphically summarized for presentation, and what characteristics were compiled and used to describe the evidence base to readers.                                                                                                                                      | Appendix 3                      |
| Risk of bias within individual studies   | 12        | Describe methods used for assessing risk of bias of individual studies (including specification of whether this was done at the study or outcome level), and how this information is to be used in any data synthesis.                                                                                                                                                                                                                            | 8;<br>Appendix 6                |
| Summary measures                         | 13        | State the principal summary measures (e.g., risk ratio, difference in means). <i>Also describe the use of additional summary measures assessed, such as treatment rankings and surface under the cumulative ranking curve (SUCRA) values, as well as modified approaches used to present summary findings from meta-analyses.</i>                                                                                                                 | 8-9                             |
| Planned methods of analysis              | 14        | Describe the methods of handling data and combining results of studies for each network meta-analysis. This should include, but not be limited to: <ul style="list-style-type: none"> <li>• <i>Handling of multi-arm trials;</i></li> <li>• <i>Selection of variance structure;</i></li> <li>• <i>Selection of prior distributions in Bayesian analyses; and</i></li> <li>• <i>Assessment of model fit.</i></li> </ul>                            | 8-11                            |
| <b>Assessment of Inconsistency</b>       | <b>S2</b> | Describe the statistical methods used to evaluate the agreement of direct and indirect evidence in the treatment network(s) studied. Describe efforts taken to address its presence when found.                                                                                                                                                                                                                                                   | 9-10;<br>Appendices 7, 8, 9, 10 |
| Risk of bias across studies              | 15        | Specify any assessment of risk of bias that may affect the cumulative evidence (e.g., publication bias, selective reporting within studies).                                                                                                                                                                                                                                                                                                      | 8; Appendix 6                   |
| Additional analyses                      | 16        | Describe methods of additional analyses if done, indicating which were pre-specified. This may include, but not be limited to, the following: <ul style="list-style-type: none"> <li>• Sensitivity or subgroup analyses;</li> <li>• Meta-regression analyses;</li> <li>• <i>Alternative formulations of the treatment network; and</i></li> <li>• <i>Use of alternative prior distributions for Bayesian analyses (if applicable).</i></li> </ul> | 10-11;<br>Appendices 13, 14, 15 |
| <b>RESULTS†</b>                          |           |                                                                                                                                                                                                                                                                                                                                                                                                                                                   |                                 |
| Study selection                          | 17        | Give numbers of studies screened, assessed for eligibility, and included in the review, with reasons for exclusions at each stage, ideally with a flow diagram.                                                                                                                                                                                                                                                                                   | 11; Figure 1                    |
| <b>Presentation of network structure</b> | <b>S3</b> | Provide a network graph of the included studies to enable visualization of the geometry of the treatment network.                                                                                                                                                                                                                                                                                                                                 | Appendix 3                      |
| <b>Summary of network geometry</b>       | <b>S4</b> | Provide a brief overview of characteristics of the treatment network. This may include commentary on the abundance of trials and randomized patients for the different interventions and pairwise comparisons in the network, gaps of                                                                                                                                                                                                             | Appendix 3                      |

|                                      |           |                                                                                                                                                                                                                                                                                                                                                                                                                                                              |                               |
|--------------------------------------|-----------|--------------------------------------------------------------------------------------------------------------------------------------------------------------------------------------------------------------------------------------------------------------------------------------------------------------------------------------------------------------------------------------------------------------------------------------------------------------|-------------------------------|
|                                      |           | evidence in the treatment network, and potential biases reflected by the network structure.                                                                                                                                                                                                                                                                                                                                                                  |                               |
| Study characteristics                | 18        | For each study, present characteristics for which data were extracted (e.g., study size, PICOS, follow-up period) and provide the citations.                                                                                                                                                                                                                                                                                                                 | Appendices 1 & 2              |
| Risk of bias within studies          | 19        | Present data on risk of bias of each study and, if available, any outcome level assessment.                                                                                                                                                                                                                                                                                                                                                                  | Appendix 6                    |
| Results of individual studies        | 20        | For all outcomes considered (benefits or harms), present, for each study: 1) simple summary data for each intervention group, and 2) effect estimates and confidence intervals. <i>Modified approaches may be needed to deal with information from larger networks.</i>                                                                                                                                                                                      | 11-17                         |
| Synthesis of results                 | 21        | Present results of each meta-analysis done, including confidence/credible intervals. <i>In larger networks, authors may focus on comparisons versus a particular comparator (e.g. placebo or standard care), with full findings presented in an appendix. League tables and forest plots may be considered to summarize pairwise comparisons.</i> If additional summary measures were explored (such as treatment rankings), these should also be presented. | Table 2 & 3; Appendices 4 & 5 |
| <b>Exploration for inconsistency</b> | <b>S5</b> | Describe results from investigations of inconsistency. This may include such information as measures of model fit to compare consistency and inconsistency models, <i>P</i> values from statistical tests, or summary of inconsistency estimates from different parts of the treatment network.                                                                                                                                                              | 16; Appendices 7, 8, 9, 10    |
| Risk of bias across studies          | 22        | Present results of any assessment of risk of bias across studies for the evidence base being studied.                                                                                                                                                                                                                                                                                                                                                        | Appendix 6                    |
| Results of additional analyses       | 23        | Give results of additional analyses, if done (e.g., sensitivity or subgroup analyses, meta-regression analyses, <i>alternative network geometries studied, alternative choice of prior distributions for Bayesian analyses, and so forth</i> ).                                                                                                                                                                                                              | 17; Appendix 13, 14, 15       |
| <b>DISCUSSION</b>                    |           |                                                                                                                                                                                                                                                                                                                                                                                                                                                              |                               |
| Summary of evidence                  | 24        | Summarize the main findings, including the strength of evidence for each main outcome; consider their relevance to key groups (e.g., healthcare providers, users, and policy-makers).                                                                                                                                                                                                                                                                        | 17-18                         |
| Limitations                          | 25        | Discuss limitations at study and outcome level (e.g., risk of bias), and at review level (e.g., incomplete retrieval of identified research, reporting bias). <i>Comment on the validity of the assumptions, such as transitivity and consistency. Comment on any concerns regarding network geometry (e.g., avoidance of certain comparisons).</i>                                                                                                          | 19-20                         |
| Conclusions                          | 26        | Provide a general interpretation of the results in the context of other evidence, and implications for future research.                                                                                                                                                                                                                                                                                                                                      | 20-21                         |
| <b>FUNDING</b>                       |           |                                                                                                                                                                                                                                                                                                                                                                                                                                                              |                               |
| Funding                              | 27        | Describe sources of funding for the systematic review and other support (e.g., supply of data); role of funders for the systematic review. This should also include information regarding whether funding has been received from manufacturers of treatments in the network and/or whether some of the authors are content experts with professional conflicts of interest that could affect use of treatments in the network.                               | 1                             |

Reference: Hutton B, Salanti G, Caldwell DM, et al. The PRISMA extension statement for reporting of systematic reviews incorporating network meta-analyses of health care interventions: checklist and explanations. *Ann Intern Med* 2015;162:777-84.
